# Supplementary material for: Myosin with hypertrophic cardiac mutation R712L has a decreased working stroke which is rescued by omecamtiv mecarbil
Source: eLife journal article supplement (doi:10.7554/elife.63691), 2021-02-19
Supplement: fig1-data1 [file Fig1B Source Data.xlsx]

## Sheet: Sheet1
	WT	R712L
0.025	0.00104676	0.122308
0.075	0.00453594	0.099651
0.125	0.00465224	0.133723
0.175	0.00546639	0.130985
0.225	0.00290765	0.141204
0.275	0.0038381	0.118123
0.325	0.0018609	0.0810436
0.375	0.00244243	0.0636123
0.425	0.00616422	0.0411099
0.475	0.0038381	0.0223482
0.525	0.00639684	0.0162357
0.575	0.0138404	0.00836852
0.625	0.00976971	0.0102775
0.675	0.0118632	0.00206321
0.725	0.0117469	0.00227531
0.775	0.0134915	0.0013112
0.825	0.00546639	0.00202464
0.875	0.00662945	0.00175469
0.925	0.0196557	0.00115694
0.975	0.0261689	0.000424211
1.025	0.041405
1.075	0.0573389
1.125	0.0946732
1.175	0.0733892
1.225	0.116422
1.275	0.106071
1.325	0.10421
1.375	0.0685043
1.425	0.0705978
1.475	0.0538497
1.525	0.0230286
1.575	0.00441963
1.625	0.00930449
1.675	0.0119795
1.725	0.000697837
1.775	0.00232612
