# Supplementary material for: Myosin with hypertrophic cardiac mutation R712L has a decreased working stroke which is rescued by omecamtiv mecarbil
Source: eLife journal article supplement (doi:10.7554/elife.63691), 2021-02-19
Supplement: fig1-data1 [file Fig1C Source Data.xlsx]

## Sheet: WT
	WT (mean)	WT (SD)
10	1.026	0.26
20	1.382	0.277
24	1.075	0.204
35	1.416	0.262
40	1.5	0.312
47	1.296	0.182
60	1.518	0.209
80	1.551	0.161
90	1.618	0.236
100	1.452	0.178

## Sheet: R712L
	R712L (mean)	R712L (SD)
40	0.22	0.115
54	0.35	0.16
60	0.275	0.09
67	0.4	0.12
80	0.23	0.105
90	0.32	0.12
100	0.3	0.11
