# Supplementary material for: Myosin with hypertrophic cardiac mutation R712L has a decreased working stroke which is rescued by omecamtiv mecarbil
Source: eLife journal article supplement (doi:10.7554/elife.63691), 2021-02-19
Supplement: fig2-data1 [file Fig2A Source Data.xlsx]

## Sheet: Sheet1
Time (ns)	R712L_Inclination	R712L_Azimuth	WT_Inclination	WT_Azimuth
0	0.000148059	0.000496912	8.81836e-05	0.000811137
1	-2.65246	-0.0823229	-1.70503	1.17092
2	-2.4155	0.440815	-5.98663	5.14352
3	-1.74564	1.5111	-2.92179	6.72394
4	-6.4264	-1.00378	-0.291808	3.2658
5	-5.48969	8.02502	-2.47801	5.50774
6	-6.607	1.19968	-0.722203	1.33459
7	-3.37544	1.94408	-3.86056	-2.53468
8	-1.93566	3.65766	-4.8469	-6.84938
9	-4.28152	0.336171	-2.95039	-3.81397
10	-3.35325	-0.636544	-1.49084	-1.10843
11	1.52505	1.80202	-1.13173	0.757013
12	0.101258	-0.315338	-1.05019	-2.50225
13	-0.403884	-4.82456	-3.41636	-2.92935
14	0.0254906	-7.9243	-0.477761	-8.37828
15	-0.235511	-6.03693	-5.58975	-4.71328
16	0.131488	-9.1948	-6.68736	-3.10237
17	0.856152	-7.49483	-6.79515	-4.35728
18	1.1153	-8.04901	-8.63018	0.738345
19	4.6266	-2.06954	-8.81197	-0.376416
20	0.996881	-6.32595	-9.1292	-1.88491
21	0.695528	-9.87387	-14.6522	-2.00083
22	0.129954	-8.01741	-14.3356	-0.867618
23	1.26059	-6.40597	-12.1188	-3.06829
24	-2.32839	-5.11894	-9.64751	-1.67342
25	-1.26007	-5.27574	-9.80229	-7.97286
26	-3.16325	-0.264625	-11.8763	-7.84679
27	-5.83545	-3.29426	-8.89285	-11.3118
28	-3.0266	-2.90356	-7.07521	-9.36517
29	-3.01695	1.28962	-4.18649	-6.06721
30	-2.78285	-0.301806	-6.62584	-7.70218
31	-3.88216	-4.62465	-7.21292	-5.91217
32	-3.26593	-2.82443	-6.00842	-8.19439
33	-2.50879	-5.87632	-6.96588	-3.9653
34	-0.558201	4.15603	-2.84971	-5.18243
35	-6.66614	5.85671	-4.94019	-7.9851
36	-5.00726	4.46936	-3.68973	-3.30955
37	-0.18586	6.41353	-4.1114	-8.7405
38	-0.763388	-0.756621	0.387736	-4.15565
39	-1.56992	-1.2116	-4.00887	-4.85962
40	-3.82771	-0.591359	-2.1581	-3.98035
41	-1.50876	-2.72621	-2.32009	-3.61658
42	-3.62555	1.7995	-4.20221	-0.844303
43	-3.55179	-0.640076	-7.35714	-5.54563
44	-5.24727	3.79623	-4.93495	-5.70902
45	-6.78781	5.63151	-7.7991	-3.06421
46	-1.34051	5.29534	-6.73748	-2.49614
47	-0.341282	3.74683	-2.30054	-1.89344
48	-0.867161	4.52755	-4.05594	-1.59955
49	2.19171	3.0699	-2.74024	-6.92625
50	-0.0257493	1.82855	-6.24297	-3.62238
51	-2.4372	0.181677	-4.96275	-2.77228
52	-3.55431	-1.72594	-5.51535	-1.39131
53	-4.76655	0.383961	-9.86274	0.211674
54	-0.773452	-0.809323	-13.367	-2.34024
55	-2.73584	-0.768047	-9.24413	-1.39582
56	-3.80432	2.05488	-8.40355	-5.46147
57	2.26878	-2.25922	-7.09366	-7.92658
58	2.03052	2.02352	-11.1342	-6.26433
59	-1.72194	1.31172	-6.59455	-8.13111
60	-4.67512	0.552028	-3.14511	-6.67652
61	-5.54687	2.11284	-5.41355	-8.7438
62	-4.79626	1.401	-5.00497	-4.09127
63	-5.63362	-3.53687	-2.49643	0.310002
64	-5.16861	-2.85809	-3.89988	-2.4408
65	-4.40035	0.501846	-3.9824	-4.97968
66	-0.377653	-3.04911	-2.78101	-6.01801
67	-0.954261	-3.42185	-4.64295	-9.5079
68	2.25335	-5.85822	-2.06197	-9.24401
69	-0.0268769	-6.20341	-1.07199	-7.1091
70	2.31521	-4.77403	1.48806	-5.56093
71	5.30546	-3.49752	-0.204013	-7.09835
72	1.21567	-1.95603	0.33592	-6.95752
73	0.302646	-0.0987424	-0.284868	-4.64114
74	1.06667	-2.26767	1.00257	-3.68939
75	0.461094	-1.25622	4.50176	-3.5065
76	2.0035	0.504444	7.05562	-2.54813
77	2.95354	-1.15062	7.0735	-3.09778
78	-2.77692	2.59794	5.28626	-3.2334
79	-0.364495	-4.10759	2.14805	-6.1335
80	-0.512039	-3.40626	3.90226	-1.46646
81	-1.21656	-3.31639	3.70629	-2.33833
82	0.887073	0.416192	1.12716	-2.47325
83	1.50392	-2.63166	1.27597	-5.28817
84	1.32654	-2.14314	2.78638	-1.57054
85	3.24594	3.08829	4.21531	-2.64471
86	2.07822	-2.76046	-0.968093	-5.41494
87	3.73555	4.1695	2.04122	-4.3917
88	3.58217	-1.4255	1.37571	-6.03635
89	7.36215	-2.93269	3.12753	-3.86068
90	5.21503	-5.43649	0.623628	-3.65298
91	6.57031	-8.35621	5.20203	-5.77213
92	6.90498	-7.74844	2.22954	-5.32408
93	3.88779	-5.98551	3.81905	-2.9804
94	2.93132	-8.52625	3.22751	-5.28714
95	4.38504	-3.93405	3.80981	-2.97899
96	8.07606	-6.45378	-0.778301	-0.436076
97	6.99172	-5.21601	-2.05123	-5.20722
98	10.8387	-6.74259	-0.630073	-4.2042
99	8.03826	-9.96129	0.690601	0.522971
100	4.1184	-2.98915	0.338724	-7.29223
101	7.06346	-7.46126	0.145548	-6.54639
102	8.28787	-6.95731	0.0651105	-5.09921
103	10.1354	-10.149	2.06863	-5.08407
104	9.66369	-6.93077	3.96833	-4.82134
105	9.24933	-3.98438	2.25109	-4.24352
106	8.50597	-7.60363	4.78048	-5.25694
107	8.69573	-10.8752	4.50666	-3.24796
108	5.18236	-6.62994	6.2615	-3.07499
109	3.04202	-6.48705	2.58957	-5.18525
110	2.65646	-4.20177	5.18482	-4.15677
111	2.32816	-6.52773	3.65996	-5.41284
112	6.24691	-4.81302	7.73122	-7.27448
113	5.56185	-10.2319	8.61024	-5.32672
114	4.88144	-6.01067	9.11805	-6.16296
115	4.51158	-4.30542	8.22289	-4.00771
116	3.98282	-0.910311	10.9372	-2.29918
117	4.40009	-1.07389	8.64491	-7.23617
118	1.99743	-7.5202	10.9692	-4.22353
119	4.90163	-6.86893	12.0156	-2.4659
120	7.25101	-5.20101	12.8403	-3.20141
121	4.93513	-5.72808	10.9089	-2.12036
122	8.85435	-5.94081	10.7113	-2.72826
123	12.0784	-9.59689	10.4463	-3.32546
124	10.2752	-7.21954	9.4831	-3.96199
125	10.9993	-9.25177	10.444	-3.21704
126	14.6352	-8.03373	11.067	0.671104
127	12.0238	-6.54223	9.82577	-1.20319
128	10.7861	-8.69241	10.2123	0.205392
129	10.9522	-6.23485	8.24458	-0.419467
130	13.4716	-6.34251	10.0748	-2.45051
131	15.3838	-3.94653	10.0142	-0.997064
132	16.788	-8.45851	9.80853	-1.01082
133	17.6931	-7.69804	12.8242	-3.05958
134	17.5912	-12.7547	10.5178	-6.77664
135	16.3294	-8.05692	11.3891	-3.50325
136	15.1344	-7.64749	11.4475	-4.06988
137	12.4409	-9.9593	9.38253	-4.35419
138	11.8172	-2.99139	7.91708	-7.18454
139	13.5779	-7.76694	8.17074	-6.586
140	16.8062	-6.19728	7.75823	-3.1142
141	14.7211	-8.81218	7.91346	-5.60891
142	17.2351	-5.37848	5.95754	-3.88892
143	17.6504	-7.4191	9.42209	-3.97346
144	17.9825	-7.24701	10.6713	-1.10851
145	20.8386	-4.65105	7.42022	-1.7733
146	19.967	-9.07292	9.20102	-2.17413
147	21.4277	-7.87089	8.18752	-0.747154
148	19.5026	-7.97104	6.65493	-3.28137
149	21.1187	-7.18031	10.3243	-3.56169
150	27.9346	-2.60473	8.50091	-3.68246
151	25.2394	-2.44438	13.1846	-0.799653
152	24.2884	-6.37013	13.4635	-0.606868
153	28.0595	-5.65659	14.0891	-0.102983
154	27.3619	-7.60594	16.8524	-4.73002
155	29.3713	-4.58456	14.8966	-2.19293
156	27.2967	-9.24056	14.9731	-5.85283
157	29.7447	-7.41268	15.1486	-6.32794
158	29.7369	-11.1329	17.0175	-6.75409
159	30.396	-12.2258	17.3617	-8.66374
160	30.5392	-12.9022	17.6511	-6.64883
161	31.7715	-12.9871	16.5172	-9.98626
162	32.7259	-11.2308	16.6669	-6.41943
163	33.3221	-13.6318	17.8451	-8.62348
164	31.1221	-13.9072	18.1258	-10.1697
165	32.566	-13.0093	18.1856	-7.71907
166	34.2425	-15.2127	17.7059	-4.9623
167	34.5486	-10.5731	19.1375	-8.04979
168	34.5574	-5.56303	18.9735	-5.9371
169	35.1376	-6.6889	17.1133	-8.42109
170	32.9837	-7.0969	16.8035	-10.2471
171	37.6097	-9.4185	16.0844	-11.5805
172	34.2214	-8.15069	16.7896	-10.8077
173	37.7967	-7.57231	18.8438	-9.77063
174	39.5839	-11.3973	16.8684	-9.42152
175	39.6867	-11.1535	19.3227	-9.26794
176	41.3874	-12.1858	19.3451	-11.5066
177	41.2349	-12.2723	20.5871	-11.625
178	41.6009	-11.9959	22.4685	-13.8308
179	40.8251	-11.3201	20.7081	-10.4126
180	38.6525	-9.80512	20.1307	-11.9884
181	36.4911	-10.0409	19.7572	-13.1086
182	36.0758	-10.0494	19.1427	-11.9639
183	40.0109	-9.91687	21.0927	-10.7913
184	40.0253	-12.1418	20.585	-11.9844
185	39.2605	-10.0954	20.0446	-9.64443
186	39.4343	-12.5064	17.7792	-12.8347
187	40.4487	-11.5594	17.8448	-13.2518
188	41.9409	-10.8694	20.6619	-9.98581
189	43.1492	-8.56545	22.0789	-11.4009
190	41.1427	-10.1103	22.9812	-9.47963
191	39.7494	-10.8386	21.4569	-13.7666
192	40.5433	-12.8812	23.9687	-10.7677
193	44.3648	-14.8668	23.4468	-11.2705
194	42.5084	-15.5613	24.4725	-10.8701
195	43.0735	-14.5176	21.5231	-7.80021
196	40.817	-14.5006	22.5258	-7.63333
197	41.3513	-14.9843	22.717	-7.77905
198	41.2743	-15.0522	23.1417	-5.90438
199	40.6197	-13.342	21.7509	-3.75409
200	41.4567	-14.6737	22.1229	-2.35116
201	41.091	-10.6351	20.7837	-3.30622
202	41.6747	-12.8637	24.4163	-3.29328
203	40.9293	-13.3255	22.3556	-7.03069
204	38.7552	-13.3401	21.198	-8.03546
205	37.7851	-14.2646	21.2976	-3.14414
206	37.0625	-16.7608	18.4199	-4.31777
207	36.9453	-18.2356	18.2506	-3.9217
208	38.7013	-14.2661	18.2093	-4.43376
209	37.9841	-16.0753	16.4855	-2.35421
210	34.6617	-13.2319	16.6723	-1.91029
211	38.004	-14.6118	19.5927	-2.11606
212	38.6901	-15.411	18.233	-1.1259
213	36.068	-16.8361	15.6958	-0.53809
214	37.4258	-17.2059	17.7114	-0.336665
215	39.2507	-14.5628	17.9577	1.40811
216	35.432	-18.9172	17.8622	2.58427
217	35.578	-16.1064	20.2698	0.645854
218	35.3735	-19.8922	18.8811	-0.552117
219	33.9264	-20.3236	18.3301	-0.438355
220	30.6374	-18.0975	19.7285	3.20612
