# Supplementary material for: Myosin with hypertrophic cardiac mutation R712L has a decreased working stroke which is rescued by omecamtiv mecarbil
Source: eLife journal article supplement (doi:10.7554/elife.63691), 2021-02-19
Supplement: fig3-data1 [file Fig3B Source Data.xlsx]

## Sheet: Forward Ensembles
**Timescale = 0.4 ms
WT	R712L
0.375599	-0.101721
0.0409248	0.0593391
0.111193	0.0254851
0.621012	0.401126
0.24331	-0.0373044
0.360149	-0.0954955
0.492662	-0.0240684
0.111029	0.0558376
0.0801393	-0.0507243
0.601505	-0.132243
0.608895	0.139939
0.271683	0.0612991
0.471016	0.508703
0.536027	0.613289
0.356401	0.48429
0.543537	-0.111679
0.590852	0.293437
0.604907	0.530091
0.355091	0.0109624
0.538365	0.550227
0.597203	0.384134
0.467436	0.233952
0.150595	0.196463
0.611094	0.429819
0.398615	-0.18089
0.148034	0.106381
0.0343799	-0.23546
0.00253843	0.182795
0.461059	0.161498
0.610901	0.0675806
0.508359	0.474256
0.586633	0.551004
0.527598	-0.0397399
0.237147	0.0899835
0.764577	0.394218
0.549732	0.0350727
0.55742	-0.178653
0.579249	0.50634
0.438604	0.311173
0.910022	0.496012
1.00061	-0.0974397
0.72702	0.236351
0.669022	-0.125307
0.579652	0.0145725
1.00333	0.228748
0.957945	-0.32761
0.519143	-0.133389
0.339681	0.019648
0.71228	-0.0029218
0.852145	0.256876
0.952879	0.264998
0.88632	0.18721
0.795572	-0.13845
0.787053	-0.265374
0.562543	-0.177141
1.06374	-0.209719
1.18493	0.133997
0.809194	0.463543
0.733758	0.376278
0.303614	0.102812
0.484019	-0.155802
0.429418	0.137417
0.56721	0.0178955
0.86417	-0.537359
0.675528	-0.111275
0.707548	-0.219735
0.568054	-0.236122
0.506649	0.182641
0.555631	-0.152284
0.131788	0.194736
-0.115529	0.0998868
0.350968	0.137065
0.50493	0.0892998
0.467615	0.145084
0.416155	-0.0284102
0.393623	-0.663207
0.227212	-0.196712
0.456654	0.144916
0.601808	0.0684086
0.033747	0.170519
0.37098	0.252472
0.774234	0.314106
0.686841	0.304718
0.483998	-0.0847739
0.214238	0.179468
0.257621	0.462712
0.388981	0.172574
0.251516	-0.220995
-0.0790525	-0.323669
-0.282336	-0.03548
-0.13276	-0.196637
0.069764	-0.0602279
0.0537165	-0.0719729
0.22811	0.0395654
0.59416	-0.0851916
0.0910071	-0.0314663
0.388899	0.349627
0.332306	0.188692
0.305264	-0.23221
0.130148	-0.481903
0.265106	0.165907
0.444757	0.0830293
0.0769272	0.176363
0.301051	-0.0796572
0.36396	0.171466
0.280351	0.400314
0.261718	0.374063
0.414723	-0.0325462
0.718983	0.169058
0.589791	0.361383
0.922495	0.204128
0.657886	0.249412
0.537974	-0.461264
0.831587	0.0796604
0.48737	0.233752
0.580849	-0.0958681
0.410443	0.230418
-0.00259386	0.122574
0.213406	0.0848415
1.02845	0.287
0.299541	0.206797
0.334692	-0.067584
0.560189	0.151421
0.665786	-0.324418
0.608664	0.245984
0.43528	0.186036
0.565857	0.184109
0.752057	0.431239
0.138429	-0.083695
0.281753	0.0904151
0.495693	-0.155263
0.775816	0.0828595
0.304424	0.524586
0.43362	0.391276
0.46676	0.0189388
0.360307	-0.254655
0.300094	0.276003
0.432912	-0.0480708
0.359484	-0.326773
0.331095	-0.194349
0.4193	-0.241036
0.742165	-0.102497
0.333439	-0.00777141
0.0920106	-0.0424117
0.253332	0.0914905
0.670815	-0.267822
0.313433	-0.458021
0.354206	0.225075
0.705985	0.203679
0.58673	0.141481
0.348372	-0.109238
0.525629	-0.188984
0.268788	0.402878
-0.110065	0.200086
0.335794	-0.0680926
1.02737	0.437172
0.60624	0.31622
0.569703	0.362145
0.832997	0.479468
0.534906	0.152587
0.322783	0.373094
0.758809	0.191776
0.463646	-0.0282867
0.794482	-0.0704995
0.66098	0.0389961
0.662079	0.237297
0.599732	0.354644
1.10937	0.538106
0.430304	0.20815
0.16541	-0.0795654
0.702605	0.0841886
0.639086	-0.0317164
0.791253	0.309174
0.342144	0.359093
0.412839	0.0703797
0.710072	0.11888
0.747211	-0.147219
0.201052	0.104334
0.343021	-0.473139
0.518078	0.0133621
0.722017	-0.359495
0.587378	-0.217973
0.84406	-0.074575
0.895713	-0.320167
0.592811	-0.100245
0.417797	0.0135557
0.405409	-0.098135
0.262616	0.0255027
0.655945	-0.199908
0.535826	0.125248
0.394779	-0.35107
0.694445	-0.200681
0.196448	-0.0724939
0.367125	-0.124721
0.634905	-0.219751
0.524604	-0.302866
0.66942	-0.127297
0.367742	0.194795
0.51921	0.54802
0.477609	0.261848
0.164392	0.208219
0.438273	-0.03248
0.120446	0.423486
0.610528	0.444269
0.664417	0.112995
0.625178	0.224204
0.485396	-0.0894678
0.441403	-0.0726308
0.400677	0.3655
0.856104	0.0433074
0.830261	-0.228618
0.29649	0.0448373
0.255253	-0.487195
0.872526	0.0286935
0.632647	-0.103932
0.488112	-0.615814
0.543242	0.143761
0.670842	0.154072
0.420765	-0.430468
0.88002	0.120999
0.681532	0.57473
0.411385	0.343673
0.592796	0.148277
0.631305	0.19226
0.713219	0.321356
0.990566	0.412548
0.632939	0.231175
0.798581	-0.196112
0.264931	-0.0213097
0.111534	-0.127902
0.219111	0.371111
0.236638	0.257078
0.317326	0.0514695
0.823416	0.059684
0.61335	0.330516
0.768535	0.123431
0.174633	0.297875
0.448688	-0.0819672
1.04667	0.0660154
0.68219	0.572046
0.212716	0.448416
0.439008	0.211267
0.341245	-0.1802
0.889512	0.14374
0.729436	-0.241054
0.197471	0.269883
0.675517	0.170802
0.750188	0.0921129
0.417625	0.113166
0.641051	-0.147249
0.715387	-0.0988156
0.458176	-0.017321
0.509174	-0.0716622
0.410734	-0.527598
0.53066	-0.302362
0.82756	0.148327
0.764414	0.275292
0.765988	-0.0318373
0.759876	-0.0878702
0.72042	0.207396
0.837717	0.0683042
0.564246	0.665894
0.362369	0.109822
0.185259	0.127556
0.727171	-0.201975
0.630544	0.0322692
0.871443	0.238269
0.422454	0.384809
0.560773	0.0907355
0.134141	0.29683
0.655122	0.409954
0.326497	0.282555
0.330231	0.379078
0.590716	-0.188189
0.586016	0.177024
0.678854	0.116436
0.402788	-0.397595
0.421844	-0.310797
0.666351	0.0918757
0.637116	0.128536
0.280047	0.0806156
0.313321	1.02957
0.681383	0.41812
0.423399	0.0479006
0.271421	0.273096
0.142958	0.0450239
0.644189	-0.0814136
0.627611	0.356522
0.599451	-0.0502101
0.509317	0.46106
0.485833	-0.0491277
0.26764	-0.195665
0.159257	-0.0426373
0.539693	0.00550803
0.791713	-0.0721371
0.196261	0.176017
-0.0515033	0.561032
0.282784	-0.039758
0.324959	-0.234862
-0.00416064	-0.345859
0.433127	-0.0849887
0.218263	-0.394767
0.407193	0.221962
0.171898	-0.345403
0.314172	-0.0534165
0.292241	0.171444
0.551795	-0.165125
0.383052	0.369018
0.461557	0.23911
0.482082	0.184038
0.22233	0.326844
0.605482	-0.228683
0.725765	-0.315889
0.240851	0.184113
0.286028	-0.0905524
0.434156	0.185027
0.387635	0.648449
0.502997	0.125272
0.602673	-0.307196
0.58873	-0.285583
0.470361	0.315043
-0.0806657	0.497791
0.134136	0.202622
-0.0357528	0.264963
0.382935	0.280314
0.426256	0.0552346
0.100292	-0.247894
0.0958293	-0.0594348
0.230381	0.153043
0.0624915	-0.0566974
0.56356	-0.120073
0.337234	0.532829
0.264672	0.270645
0.253572	0.452538
0.230849	-0.15894
0.747243	-0.0473043
1.00026	0.294344
0.770194	0.47373
0.625885	0.300479
0.471854	0.199658
0.517572	-0.0115131
0.449079	0.0866822
0.266653	0.0548257
0.468905	0.130732
0.169064	-0.0895034
0.0703191	-0.672718
0.319902	-0.139314
0.499662	0.363236
0.589082	-0.107535
0.636305	0.136077
0.669887	0.392855
0.869372	0.166923
-0.00902679	0.144805
0.435168	0.0847626
0.0238787	0.36934
0.11627	0.43038
0.301814	0.316592
0.022783	-0.225738
0.0603731	-0.033487
0.43805	-0.497933
0.43551	-0.49404
0.331575	-0.392717
0.66523	-0.00153184
0.566002	0.0291063
0.216982	0.0423718
0.414159	0.0500874
0.806541	0.0663981
0.505061	0.0242122
0.598187	0.166637
0.394336	-0.0898822
0.704557	0.226919
0.545359	0.605343
0.450058	0.247303
0.613391	0.131045
0.297045	0.222765
-0.121917	0.0649881
0.34398	0.43015
0.500338	0.505516
0.197969	0.30599
0.00491019	-0.12587
0.25105	0.0231803
0.255528	0.114633
0.35267	-0.219384
0.136959	0.0872097
0.576214	0.0592833
0.909671	-0.180729
0.354611	0.254367
0.356595	0.307951
0.647399	0.490848
0.410993	0.129824
0.320567	0.244137
0.0874003	0.456881
0.623984	0.295446
0.174796	0.280835
0.330332	0.682992
0.357079	0.455643
-0.0489694	0.047831
0.12619	0.102876
0.359008	0.455313
0.752253	0.597079
0.644546	0.000437574
0.241675	-0.0266237
0.0516474	0.157791
0.100136	-0.205504
1.00003	-0.128149
0.605728	-0.0272409
0.294755	-0.266351
0.464224	0.0109316
0.438149	0.0111506
0.361966	0.186336
0.740337	0.42106
0.279374	0.364662
0.047131	0.228783
-0.0801068	0.223964
0.299347	0.19047
0.406951	0.291992
0.329649	-0.103241
0.190223	0.104068
0.317094	0.185612
-0.0259239	0.179049
0.447405	0.14137
0.55705	0.388133
0.36896	0.0606455
0.817434	-0.0978303
0.318846	0.0459892
0.231575	-0.061259
0.392639	0.352361
0.249764	-0.101076
0.83464	0.194041
0.448617	-0.00541499
0.291163	-0.108409
0.584765	0.102114
0.324233	0.0840417
0.225171	0.0619931
0.375654	0.08851
0.370649	0.320917
0.876879	0.596522
0.25091	0.269058
0.505209	0.136299
0.608771	-0.0817531
0.491079	0.0155122
0.590011	-0.344963
0.282531	-0.119999
0.27628	0.147519
0.0764836	-0.0126943
0.196347	0.160771
0.668245	0.436129
0.252208	-0.105696
0.571224	-0.0629092
0.284151	0.178146
0.347536	-0.433709
0.0943844	-0.0366624
0.319492	-0.146148
0.147796	-0.149402
0.466915	-0.0300241
0.596794	0.0178482
0.193882	0.0791702
0.0714125	-0.479516
-0.00876853	-0.208041
0.0614846	0.263885
0.145982	-0.109017
0.463193	-0.273215
0.368223	-0.414847
-0.126328	0.0355777
-0.0295996	-0.126282
0.13014	-0.00750604
0.242785	0.349704
0.273806	0.566783
0.447063	0.192223
0.467531	0.363096
0.398081	-0.12987
0.0644192	-0.328531
0.239605	0.320236
0.287903	-0.219482
0.246728	0.0760892
0.386912	0.0351579
0.132699	-0.00487832
-0.142829	0.152199
0.289336	0.317892
0.527758	-0.0465278
0.460056	0.101759
0.0595333	0.181721
0.659529	0.407129
0.121205	0.335124
0.202903	0.118799
0.244595	0.113422
0.272158	-0.372012
0.136527	-0.0697152
-0.0458054	0.262386
0.572909	0.0197576
0.2072	0.172802
0.0277808	0.0127882
-0.209684	-0.142513
0.23632	-0.100437
0.78652	-0.108896
0.387675	0.212507
0.0171324	-0.0290531
0.13707	0.110898
-0.270221	0.286279
-0.308269	-0.0873773
0.0791017	-0.379287
0.242649	0.165758
0.186295	-0.0579301
0.045236	0.0773166
0.341433	0.240602
0.424213	0.139207
-0.13666	0.143223
0.071903	0.453928
0.272297	0.183068
0.08769	0.037579
0.194373	-0.0613265
0.431413	-0.419765
0.114476	-0.164139
-0.0682425	0.234294
0.183846	0.295119
-0.119138	0.294669
0.0669235	0.253278
0.378248	0.516539
0.221587	0.364041
0.497388	0.199729
0.0958624	-0.313334
0.0973564	-0.130305
0.113388	0.0238974
0.727359	-0.561075
0.785488	0.306719
0.325882	0.353473
0.405586	0.0292232
-0.106383	0.239153
0.149206	0.268207
-0.0667371	0.427996
-0.15846	0.0865525
0.0917836	-0.307999
0.551023	0.348776
-0.0840706	0.0907288
0.24897	0.185994
0.170396	0.189254
-0.0112728	-0.208837
-0.818845	-0.0514091
-0.256791	0.608066
-0.0664332	0.395512
0.356646	0.264505
0.418238	0.281486
-0.07705	0.118164
0.152494	-0.0557448
0.273413	0.374826
-0.141762	0.0529033
-0.348258	0.257845
-0.167016	0.447666
0.0135387	0.666065
-0.0118624	0.209906
0.246355	0.273482
0.202675	0.194866
-0.0993639	0.269416
-0.0639377	-0.345164
0.279083	0.150095
0.522343	-0.162745
0.38556	0.455982
0.254821	0.378365
0.359766	0.618941
0.241698	0.469272
0.646552	0.42325
0.0225974	-0.0762854
0.157795	0.091188
-0.158669	0.394547
0.122549	0.514135
0.336254	0.506775
0.259712	-0.10018
0.334682	0.505995
0.168576	0.241814
0.458461	-0.307395
0.277659	-0.413831
0.716493	-0.345582
0.0373659	-0.260593
0.276001	0.332349
0.162911	0.411538
0.10583	0.143911
0.550319	-0.0826051
0.912739	0.146571
-0.348899	-0.0569577
-0.0283633	0.0780938
0.243883	0.438016
0.200077	0.196375
0.380413	0.101212
0.323956	-0.0912325
0.525268	0.158177
0.481871	0.382124
-0.0843073	0.156389
0.00586769	0.0807367
0.145981	0.261151
0.646572	0.0653916
0.0555549	0.296614
0.277301	-0.0258134
0.581642	-0.126681
0.171109	-0.0343179
0.104718	0.124402
0.395444	0.135633
0.312516	0.339703
0.310571	0.391249
0.552245	0.158256
0.367796	0.158127
-0.128942	-0.208021
0.271724	0.156758
0.842152	0.237802
0.271415	-0.182042
0.315479	-0.178016
0.26641	0.0144469
-0.275168	0.310617
0.0573555	0.737085
0.214526	0.416079
0.536339	0.199318
0.388609	0.211231
0.265877	0.262046
0.48002	0.197683
0.218541	-0.0262839
0.190702	-0.421482
0.656584	-0.112496
0.569358	0.270635
0.723881	-0.249461
0.65929	0.128742
0.2979	0.520233
0.181646	-0.0823239
0.483192	-0.284384
0.72041	0.185071
0.325876	-0.38447
0.331258	-0.276187
0.0850823	0.152864
0.245957	-0.225861
0.459306	-0.120879
0.36222	-0.106516
0.280586	0.204772
0.190631	-0.00205274
-0.100318	-0.176298
-0.115099	-0.176887
0.373776	-0.161994
0.32978	-0.0259261
0.487454	0.347283
0.231274	0.329566
0.0706673	0.110013
0.632074	-0.12736
0.364871	-0.155856
0.238522	0.142089
-0.0126263	0.137421
0.325036	0.0733882
0.428831	-0.0568487
0.198259	-0.0601604
0.407528	-0.217403
0.312419	-0.436407
0.690365	0.329885
0.447591	-0.0492868
-0.0474235	0.193099
0.100222	0.0965762
0.338177	0.120577
0.584713	-0.0104063
0.223085	-0.156682
0.332625	-0.232275
0.407362	-0.0296336
0.0944294	0.304766
0.332864	0.815317
0.75254	-0.0566433
0.407314	-0.186976
0.59229	0.0517156
0.504898	-0.077977
0.324333	0.118773
0.416782	-0.0570943
-0.042792	0.114187
0.474486	0.301015
0.202687	-0.566667
0.225198	-0.465355
0.427604	-0.0239351
0.576852	-0.192805
0.759778	-0.128285
0.220682	0.157019
0.483126	-0.322818
0.422885	-0.459249
-0.182402	-0.0530675
0.44621	0.138762
0.608944	0.206375
0.09144	0.242175
0.0204057	0.166999
0.330108	0.366663
0.290301	0.400938
0.250195	0.370575
0.0256043	-0.101072
0.426619	0.00924131
0.21539	-0.0182851
0.335035	0.217584
0.623962	0.142074
0.246898	-0.455248
0.318787	-0.399274
0.387335	-0.0299723
0.0737158	0.264708
0.323918	-0.175918
0.376684	0.11337
0.179496	-0.138122
0.388199	0.0725858
0.549758	-0.053555
-0.169103	-0.113999
0.345194	0.277126
0.378837	-0.0959331
0.478223	0.302614
0.505355	0.390293
0.602995	0.160918
0.378725	-0.195011
0.203895	0.119173
0.66173	0.352476
0.167643	0.264383
0.305856	-0.00567104
0.588718	0.255943
0.761023	0.102044
0.522874	-0.0765048
0.151622	-0.393991
0.429531	-0.445356
0.162321	0.320199
0.322265	0.141396
0.506899	0.238126
0.165	0.251401
0.408978	0.349681
-0.0659191	0.0986674
0.124958	0.296189
0.0666261	0.227612
0.0899315	0.155419
0.101533	-0.135362
0.172415	-0.0720556
0.552025	-0.113392
0.611841	0.0160679
0.299941	-0.00993336
0.757296	-0.129041
0.599337	0.0252228
0.349897	0.231682
0.390441	0.0331254
-0.00290296	0.0577169
0.297061	0.286361
0.279879	0.032569
0.161931	0.269354
0.243399	0.0947105
0.12708	-0.0102522
-0.00527341	0.255631
0.577432	0.114307
0.293173	0.00419387
0.677552	0.590483
0.735305	0.366629
0.197087	-0.0230429
0.258026	0.20377
0.215977	-0.148462
0.505718	-0.135582
0.521504	0.0800207
0.62237	0.0894357
0.0325543	0.536251
0.0455469	0.108405
0.491861	0.0474501
0.5547	0.0293374
0.268925	0.0785317
-0.0730272	0.282023
-0.173263	0.211567
-0.00439261	0.472728
0.189699	0.510435
0.239251	0.188384
0.0730735	0.23065
0.084816	0.341268
0.747962	0.405679
0.364351	0.416015
0.229138	-0.0818963
-0.0383828	0.248656
0.328545	-0.0653656
0.083432	0.146673
0.120412	0.235987
-0.366821	0.532858
-0.660107	0.373064
0.000535942	-0.0708797
-0.146582	0.479196
0.291817	0.280335
-0.160448	0.201399
-0.014925	0.0724563
-0.322421	-0.0166133
-0.0732832	0.300465
0.173691	-0.0743249
0.0702384	0.124217
0.205384	0.138959
0.321395	0.0873802
0.206973	-0.419931
0.465672	0.294281
0.186359	0.244597
0.0144947	0.0634834
0.364733	0.157157
0.11493	-0.0417824
-0.108222	0.178761
-0.148555	0.0589361
0.42261	0.206945
0.293676	0.224667
-0.136378	0.282923
-0.140273	-0.286751
0.357527	-0.492592
0.342711	-0.347647
-0.400295	0.22789
-0.139378	0.381723
0.188101	0.0539861
0.337782	-0.236625
0.704272	0.258557
0.768121	0.185306
0.269315	0.050852
0.635221	0.11467
0.187042	0.161548
0.09235	0.416758
0.255921	0.692747
0.455442	0.377516
0.633244	0.14569
0.243516	0.07448
-0.0148634	0.248384
0.225679	-0.0875777
0.083325	0.12307
0.451808	-0.173936
0.213228	0.122337
-0.0102074	0.171018
0.715169	0.292234
0.289692	0.0886395
0.320731	0.187444
0.543877	-0.0779427
0.14048	-0.190763
0.293834	0.0662759
0.31189	-0.2896
0.134143	-0.096699
0.144111	0.167125
0.140266	-0.0865653
0.770299	0.100748
0.474536	0.106537
0.824458	-0.358246
0.682237	0.265374
0.377879	0.293989
0.400779	0.211715
0.166151	0.272126
0.647981	0.104179
0.94923	-0.209206
0.976272	-0.337004
0.0439978	-0.218127
-0.000743238	0.278988
0.474949	0.518067
0.798615	-0.106105
0.231649	0.125505
0.679599	0.606815
0.342512	0.374911
0.206971	0.0367564
0.716513	0.0111085
0.881014	-0.0584619
0.460747	0.432863
0.26813	0.450868
0.184074	0.169608
0.194471	0.0954401
0.440492	0.100333
0.629061	-0.160915
0.399418	0.273991
0.359062	0.310577
0.31001	0.0313216
-0.0462458	0.399574
0.659428	0.134401
0.427735	0.209383
0.299863	0.0957781
0.589721	0.270975
0.182059	0.0813629
0.479777	0.0101898
0.0759074	0.0529365
0.216557	-0.264604
0.487658	-0.287095
0.443959	0.156533
0.850312	-0.0489685
0.614979	0.275305
0.332375	0.429371
0.256477	-0.131111
0.154134	0.464581
0.850774	0.59545
-0.044978	0.514147
-0.0659072	0.651552
0.0052497	-0.146066
0.762708	0.108855
0.120719	0.050497
0.350841	0.20988
0.640779	0.190685
-0.419037	0.143957
0.533082	-0.189907
0.225346	0.198746
-0.353772	-0.0899337
0.256985	0.00103077
0.0973311	-0.208515
0.290784	0.0873128
0.15639	0.196493
0.342149	-0.0319681
0.297696	0.236478
0.635284	0.0865343
0.440709	-0.00631631
0.26499	0.00227944
0.250657	-0.0167378
0.54274	0.147697
0.685574	0.413984
0.227825	0.0423766
0.610755	-0.107402
0.205568	-0.146274
0.224861	0.0803723
0.070709	0.287238
0.407289	0.346421
0.423611	0.44323
0.560664	0.423785
0.254979	0.301087
0.648814	-0.165558
0.857118	-0.390915
0.854515	-0.468543
0.221181	0.0372608
0.402068	-0.142603
0.41063	0.305959
-0.115419	0.224845
-0.11117	0.222932
0.538252	-0.455519
0.565491	-0.384797
0.285562	0.37094
0.42434	0.0734921
0.283371	0.180842
0.52957	-0.137544
0.496167	0.27265
0.232892	0.374903
0.281245	0.0716921
0.731037	0.237419
0.661478	0.451877
0.401059	0.205746
0.485653	0.0221214
0.542035	-0.0134519
0.696814	0.403703
0.872695	0.670517
0.734421	-0.0473262
0.384027	-0.267298
0.40439	0.14037
0.687822	0.333565
0.893462	0.294359
0.630399	-0.186131
0.75567	0.471083
0.407281	0.209736
0.808668	0.0176325
0.614414	-0.22071
0.115842	-0.317202
0.470557	0.134923
0.325664	0.458812
0.281756	0.209547
0.0597931	0.324985
0.732946	-0.00809016
0.516714	0.288555
0.334167	-0.0298713
0.407229	0.236504
0.103194	0.0523197
0.419198	-0.161345
0.448242	0.367548
0.194258	-0.0167632
0.493439	0.173683
0.369851	0.141982
-0.13969	0.119049
0.150272	-0.189753
0.110781	0.203165
0.244812	-0.0783906
0.372228	0.161406
0.985446	0.183236
0.822901	0.238161
0.234	0.0227486
0.467045	0.0847515
0.618363	0.266631
0.257217	0.0566091
0.595137	-0.0474519
0.753228	0.0140775
0.827441	0.0992863
1.1418	0.159999
1.26066	0.170046
1.45237	0.0229271
1.33321	0.36163
1.2231	0.23021
1.66845	0.334469
1.15363	0.56385
0.556707	0.183372
1.11057	0.28476
1.05167	0.463793
1.21715	0.0205358
0.763333	-0.128207
1.0649	-0.0569597
0.972907	0.344706
0.99747	0.0396962
1.17886	0.281142
1.19615	0.6675
0.738418	-0.0737318
0.838851	0.283506
0.849398	0.3658
0.970021	0.309113
1.05975	0.355259
0.875685	0.128237
1.11633	0.267731
0.986585	0.329415
1.16281	0.266054
0.303339	0.412707
0.844356	0.211354
1.04714	0.609435
1.19306	0.362791
1.18994	0.648347
2.00989	0.774825
2.26822	0.694885
2.53077	0.855219
2.33098	0.398445
2.66055	0.432498
3.24479	0.89559
3.19119	1.00923
3.01511	1.0058
3.24757	0.848782
3.23341	0.493121
3.67013	0.586131
3.46134	0.914688
3.40934	0.64709
3.93995	0.700535
4.19084	1.4809
4.04609	0.996039
3.57823	0.828431
3.4364	1.04856
3.57987	1.03389
3.9661	0.961265
3.87206	0.992281
3.80205	0.96914
3.91276	0.775939
3.80876	1.01517
4.09583	0.909026
4.06426	0.872004
3.9863	0.769524
4.11245	1.07367
4.1382	0.959841
3.81717	1.12295
4.02605	1.34325
3.87462	1.15018
3.95163	1.58219
3.95784	1.33198
4.13608	1.20873
3.96856	1.21954
4.05297	1.09751
4.18316	1.11186
4.07545	1.25652
4.20065	1.26686
4.20023	1.33597
4.14576	1.36725
4.25768	1.2962
4.16369	1.23099
4.01995	1.38789
4.03308	0.990766
4.21416	1.24523
4.38338	1.32313
4.37779	1.01567
4.31703	0.943337
4.42104	1.01181
4.50915	1.06997
4.32658	0.957167
4.15784	0.88588
4.07079	0.900866
3.69694	1.16164
4.02185	1.12142
3.93958	1.03772
4.15812	1.25002
4.10815	1.14609
4.11989	0.983701
4.1963	1.27583
4.38868	1.01914
4.10398	1.05787
3.879	1.26822
3.87103	1.09543
4.10547	0.985489
3.98092	0.894117
3.88831	0.933631
3.93818	1.17919
4.00448	1.2515
3.85068	1.17627
4.16936	1.36472
4.32685	1.26076
4.2363	1.38935
4.10983	1.37637
4.12658	1.12209
4.19746	1.05618
4.16472	1.09549
4.25656	1.02577
4.46269	1.18712
4.69149	1.30421
4.46739	1.25196
4.62538	1.22388
4.78876	1.34951
4.5853	1.46529
4.45567	1.7461
4.44607	1.48584
4.29058	1.42323
4.27085	1.31197
4.55057	1.18534
4.4972	1.11369
4.8245	1.30011
4.56272	1.18119
4.49628	1.22862
4.33116	1.27908
4.45411	1.19506
4.34731	1.21441
4.1302	1.41275
4.2186	1.37114
4.58938	1.46447
4.10717	1.56169
4.15403	1.46408
4.59321	1.29489
4.48681	1.29954
4.44701	1.27175
4.35176	1.34012
4.60792	1.37424
4.37656	1.31434
4.462	1.51109
4.31182	1.44372
4.4693	1.53683
4.32686	1.38738
4.27337	1.51582
4.40752	1.51728
4.34102	1.09967
4.31134	1.34443
4.26831	1.26973
4.34821	1.32103
4.40142	1.1274
4.37541	1.3138
4.44118	1.4547
4.47949	1.43932
4.27483	1.3543
4.46924	1.44913
4.51658	1.48428
4.74901	1.29693
4.66595	1.22558
4.59096	1.39644
4.42113	1.1237
4.37793	1.11171
4.65292	1.28722
4.56288	1.22468
4.59975	1.0078
4.67216	1.17497
4.5571	1.26258
4.65185	1.31776
4.6644	1.28125
4.40493	1.14388
4.38064	1.30048
4.3791	1.27949
4.77601	1.32884
4.84531	1.35561
4.55254	1.44264
4.79829	1.57723
4.79078	1.6232
4.31927	1.57768
4.55628	1.53617
4.85182	1.34246
4.66358	1.33783
4.74415	1.34048
4.6568	1.26671
4.55364	1.42942
4.80182	1.2719
4.66525	1.63661
4.73802	1.46852
4.78779	1.47201
4.66408	1.4413
5.04459	1.47589
4.80475	1.44542
4.69978	1.29941
4.60778	1.48572
4.73403	1.26375
4.56039	1.18935
4.46693	1.26184
4.3918	1.26831
4.41634	1.10366
4.24285	1.20533
4.24746	1.10495
4.32141	1.34067
4.23572	1.17477
4.34941	1.25275
4.43503	1.17413
4.45498	1.07318
4.32474	1.19425
4.40932	1.17513
4.50539	1.30092
4.58696	1.19869
4.52467	1.16256
4.16971	1.25659
4.26581	1.12427
4.54113	1.39
4.34585	1.44841
4.1599	1.20091
4.17626	1.22411
4.49353	1.33694
4.55942	1.32113
4.58124	1.17786
4.80784	1.1769
4.64634	1.17518
4.52591	1.29463
4.61735	1.21391
4.70182	1.27967
4.44437	1.27033
4.2206	1.44673
4.22216	1.35075
4.39237	1.2913
4.4825	1.34455
4.75705	1.18232
4.15473	1.19873
4.23824	1.14531
4.53835	1.27425
4.49692	1.30876
4.72081	1.22979
4.7062	1.20886
4.66244	1.17913
4.29441	1.16085
4.34504	1.17248
4.29893	1.24657
4.47494	1.29649
4.49193	1.09653
4.49095	1.16595
4.57379	1.41754
4.60934	1.41914
4.48031	1.20234
4.46167	1.41203
4.404	1.34563
4.55491	1.23364
4.51482	1.28237
4.51616	1.30332
4.45171	1.28802
4.46475	1.22866
4.37236	1.18572
4.40328	1.13511
4.43468	1.14602
4.48602	1.26186
4.18713	1.23638
4.31586	1.36264
4.45647	1.26857
4.59217	1.21771
4.64699	1.20919
4.62689	1.26578
4.55232	1.2958
4.60799	1.13464
4.59532	1.20427
4.67378	1.19733
4.5259	1.22828
4.36769	1.19692
4.30981	1.38944
4.38078	1.34236
4.3495	1.39094
4.26819	1.40624
4.16768	1.26449
4.37068	1.3104
4.27814	1.25713
4.39163	1.19751
4.58142	1.35121
4.33059	1.42602
4.2701	1.32976
4.68047	1.34066
4.61477	1.365
4.52467	1.39206
4.46893	1.38121
4.24284	1.13646
4.37182	1.16933
4.48656	1.16137
4.55099	1.2525
4.50641	1.18563
4.22195	1.09026
4.43925	1.38826
4.52171	1.34744
4.43982	1.23359
4.37095	1.21823
4.37406	1.25719
4.33602	1.2816
4.45478	1.23135
3.98975	1.2326
4.22033	1.24839
4.40813	1.15482
4.30069	1.23505
4.32252	1.26161
4.39442	1.3746
4.44462	1.33209
4.45909	1.31006
4.32178	1.30361
4.46866	1.18964
4.52374	1.23447
4.28398	1.20971
4.52835	1.21173
4.49558	1.16867
4.60971	1.26422
4.59948	1.28715
4.37302	1.30899
4.52095	1.09876
4.40791	1.15296
4.38224	1.29288
4.33576	1.09312
4.45485	1.26749
4.26797	1.28393
4.18723	1.16053
4.36417	1.05307
4.39719	1.19344
4.07659	1.13094
4.3752	1.14891
4.31737	1.34512
4.39401	1.3072
4.50302	1.18718
4.34756	1.32093
4.37684	1.32635
4.35144	1.35691
4.33899	1.31517
4.28445	1.28166
4.38738	1.13082
4.62325	1.27038
4.46145	1.13426
4.32639	1.13333
4.35585	1.09992
4.33281	1.18109
4.38495	1.18928
4.23201	1.15815
4.27745	1.14022
4.41172	1.1879
4.41271	1.15682
4.87596	1.12673
4.52735	1.14174
4.27029	1.01353
4.45353	1.01192
4.33256	1.08896
4.34626	1.00324
4.37473	1.00753
4.39804	0.918933
4.40848	1.02301
4.39223	1.0111
4.44602	1.15928
4.61345	1.17788
4.39933	1.25098
4.39052	1.16199
4.45229	1.04021
4.59904	1.19479
4.47219	1.22598
4.29843	1.12159
4.34698	1.05297
4.4467	1.04683
4.3062	1.05702
4.09363	0.95783
4.06814	1.0311
4.1531	1.13806
4.27173	1.09925
4.32019	1.0535
4.38172	1.15074
4.46725	1.22503
4.41607	1.26924
4.50315	1.23264
4.43758	1.25659
4.19773	1.2711
4.32223	1.09712
4.26731	1.08268
4.26363	1.06217
4.37913	1.12058
4.18579	1.0793
4.23842	1.15375
4.42576	1.3023
4.48513	1.18605
4.46694	1.20049
4.57331	1.19762
4.4262	1.30276
4.62755	1.24781
4.4568	1.21284
4.24772	1.20388
4.14654	1.19211
4.30385	1.23185
4.21439	1.35355
4.28276	1.21094
4.41716	1.34407
4.4473	1.28182
4.50327	1.28824
4.30069	1.1237
4.38593	1.17381
4.34882	1.19788
4.28097	1.23021
4.18902	1.22936
4.11509	1.1746
4.25547	1.0889
4.09623	1.08541
4.3652	1.0797
4.40101	1.15044
4.32102	1.18038
4.36411	1.0773
4.30135	1.10229
4.11951	1.23801
4.26513	1.175
4.40109	1.17169
4.28605	1.11509
4.20802	1.22323
4.08759	1.1984
4.23005	1.1068
4.31976	0.947096
4.05808	1.06216
4.07266	1.08622
4.30671	1.15942
4.32486	1.14879
4.37785	1.03683
4.26015	1.20793
4.34547	1.22653
4.44568	1.18702
4.49028	1.22468
4.49099	1.24565
4.50745	1.26308
4.4019	1.16858
4.38658	1.19268
4.38423	1.14454
4.52069	1.26423
4.41116	1.07908
4.30907	1.06587
4.34752	1.00055
4.23778	1.20594
4.38486	1.14996
4.19943	1.15589
4.26336	1.25583
4.27284	1.16982
4.34859	1.09912
4.29564	1.05662
4.16915	1.24548
4.25375	1.25878
4.25085	1.18985
4.20765	1.31022
4.19458	1.19626
4.23605	1.16014
4.20742	1.13053
4.30579	1.12409
4.21803	1.12241
4.16821	1.2537
4.27898	1.13735
4.22198	1.08639
4.39245	1.11954
4.15571	1.20152
4.33524	1.28119
4.3569	1.20647
4.307	1.28589
4.34737	1.39601
4.11239	1.31349
4.28686	1.39005
4.18639	1.32376
4.22533	1.44459
4.39482	1.32891
4.32904	1.31528
4.50897	1.41082
4.4041	1.38189
4.25096	1.3319
4.12395	1.19971
4.17639	1.29696
4.10143	1.37576
4.07258	1.27384
4.11348	1.31385
4.27872	1.29862
4.28231	1.22977
4.35753	1.23331
4.35036	1.35998
4.312	1.32676
4.34748	1.38855
4.21424	1.40605
4.00423	1.35765
4.14928	1.40762
4.15233	1.32969
4.12542	1.38504
4.22153	1.35355
4.30281	1.31597
4.42427	1.26111
4.32679	1.30637
4.32904	1.27014
4.37184	1.22605
4.35419	1.33557
4.46166	1.30498
4.43359	1.24684
4.29	1.23199
4.19357	1.27947
4.31825	1.21777
4.38402	1.15953
4.38601	1.34189
4.20816	1.33435
4.2557	1.34476
4.30478	1.28499
4.41605	1.33435
4.22315	1.3524
4.25482	1.35093
4.28393	1.3652
4.16039	1.24486
4.09199	1.15199
4.0602	1.26043
4.32992	1.28283
4.4289	1.25314
4.29399	1.41644
4.3057	1.39131
4.3125	1.37817
4.30535	1.36276
4.20891	1.31434
4.31921	1.38645
4.37707	1.36863
4.41461	1.35647
4.30094	1.31943
4.47957	1.22664
4.35146	1.34678
4.4018	1.26663
4.38869	1.29768
4.36082	1.25026
4.28418	1.20133
4.46599	1.32384
4.51529	1.17065
4.45741	1.19731
4.4766	1.19251
4.40982	1.23049
4.4617	1.3008
4.27457	1.1595
4.37012	1.32565
4.52288	1.20149
4.51883	1.19669
4.36967	1.33055
4.4253	1.2358
4.42543	1.21604
4.30519	1.22748
4.45968	1.18355
4.34331	1.13455
4.36933	1.2134
4.38881	1.18194
4.35457	1.22077
4.2898	1.16788
4.34483	1.18849
4.41547	1.28765
4.21914	1.20082
4.29643	1.25814
4.38897	1.25826
4.31339	1.29909
4.34481	1.27035
4.31887	1.39148
4.26426	1.29526
4.35012	1.30677
4.39087	1.2391
4.3908	1.24836
4.45382	1.24781
4.35721	1.30608
4.31081	1.35136
4.41043	1.33041
4.30122	1.35984
4.40701	1.33839
4.4431	1.22546
4.29088	1.24208
4.40558	1.27106
4.38699	1.31911
4.499	1.29429
4.44464	1.20815
4.38482	1.20646
4.46029	1.30417
4.46182	1.31418
4.44838	1.32753
4.37475	1.25544
4.47078	1.22845
4.2897	1.31304
4.28064	1.23096
4.36989	1.21064
4.36646	1.32264
4.49548	1.28818
4.49425	1.21705
4.48245	1.2401
4.35865	1.14707
4.39879	1.13632
4.40562	1.24692
4.29849	1.16843
4.34954	1.21974
4.42991	1.16426
4.28998	1.197
4.30114	1.24756
4.3114	1.21299
4.16795	1.21498
4.26701	1.23381
4.37601	1.25663
4.56479	1.20491
4.3852	1.24072
4.4783	1.23096
4.40772	1.17842
4.36448	1.16307
4.33138	1.15682
4.37916	1.24987
4.32993	1.31348
4.39484	1.30194
4.33704	1.27416
4.42352	1.27331
4.53109	1.25526
4.40386	1.24497
4.39977	1.21106
4.34509	1.24557
4.3216	1.28791
4.45331	1.30804
4.43524	1.26341
4.37013	1.23259
4.34172	1.32158
4.3537	1.28902
4.42208	1.28261
4.37394	1.26916
4.47003	1.2667
4.43956	1.18986
4.32226	1.14473
4.37806	1.18522
4.51007	1.25247
4.47828	1.26301
4.38198	1.25514
4.44723	1.21139
4.46448	1.31233
4.37498	1.29173
4.44042	1.29841
4.35044	1.26851
4.28008	1.32932
4.34281	1.24655
4.38042	1.32805
4.33634	1.25137
4.35614	1.17397
4.31565	1.18513
4.19839	1.1666
4.29397	1.18031
4.40019	1.20357
4.44239	1.19728
4.45549	1.15645
4.36217	1.1447
4.33533	1.19033
4.31498	1.19589
4.20185	1.17623
4.29533	1.20356
4.33314	1.19287
4.27204	1.23751
4.37136	1.28792
4.2988	1.23128
4.26501	1.30979
4.31582	1.31237
4.3716	1.29365
4.44295	1.32768
4.37099	1.27246
4.26905	1.3081
4.29931	1.25166
4.32341	1.24873
4.33543	1.31623
4.26801	1.26489
4.23157	1.21282
4.40263	1.26448
4.32438	1.24513
4.2804	1.29866
4.28622	1.32629
4.27113	1.35442
4.26984	1.33445
4.22182	1.2546
4.22242	1.28332
4.30526	1.19845
4.15027	1.25969
4.20455	1.2641
4.26219	1.188
4.32222	1.15831
4.3586	1.23729
4.32715	1.3066
4.31193	1.26987
4.41837	1.23963
4.3231	1.28516
4.40934	1.2878
4.38102	1.32264
4.44007	1.33512
4.35842	1.23331
4.41144	1.25099
4.38702	1.28948
4.3528	1.31359
4.39375	1.33144
4.40379	1.29314
4.33324	1.25954
4.39306	1.31616
4.46207	1.34769
4.40466	1.36829
4.4092	1.28813
4.35223	1.23601
4.41248	1.26537
4.4341	1.26209
4.47217	1.21773
4.44652	1.24989
4.46436	1.22253
4.4255	1.21323
4.48814	1.23277
4.39089	1.23066
4.50378	1.24178
4.59124	1.19049
4.45827	1.16178
4.51302	1.2266
4.37591	1.24478
4.35348	1.21916
4.3934	1.21524
4.36115	1.24185
4.19198	1.20322
4.33134	1.1681
4.45175	1.20366
4.44959	1.19935
4.48496	1.19869
4.39811	1.24674
4.25623	1.28248
4.23339	1.25945
4.3517	1.23499
4.33283	1.2261
4.39139	1.22718
4.33087	1.24135
4.37268	1.22541
4.3099	1.19285
4.28826	1.22516
4.39499	1.19899
4.31148	1.23217
4.27238	1.22723
4.33615	1.26198
4.3587	1.297
4.43621	1.27387
4.37722	1.26672
4.29375	1.24176
4.38892	1.25514
4.33689	1.21565
4.33913	1.22951
4.39706	1.20407
4.28949	1.22265
4.36332	1.23078
4.30866	1.19823
4.45957	1.22882
4.50434	1.21004
4.41087	1.21416
4.42327	1.21465
4.29671	1.20481
4.31138	1.21891
4.36987	1.26705
4.38009	1.24146
4.36038	1.23795
4.43027	1.25755
4.37629	1.24432
4.35996	1.18589
4.33963	1.23622
4.33236	1.25565
4.38476	1.24384
4.35116	1.23087
4.32056	1.18896
4.28828	1.21418
4.3786	1.2404
4.33097	1.22209
4.23668	1.21766
4.28049	1.18836
4.27942	1.2203
4.32947	1.21706
4.40554	1.26209
4.30858	1.22249
4.26276	1.22374
4.29757	1.26743
4.28157	1.22337
4.29596	1.21057
4.41324	1.21354
4.33072	1.26082
4.29335	1.27701
4.37465	1.22121
4.40785	1.29984
4.51616	1.29092
4.42222	1.26389
4.38798	1.24506
4.33377	1.24442
4.38812	1.22912
4.38481	1.27741
4.30649	1.2622
4.32388	1.24171
4.25985	1.19051
4.30405	1.20077
4.36813	1.16647
4.32084	1.23557
4.24268	1.21575
4.26499	1.18029
4.32361	1.18779
4.30178	1.18369
4.43001	1.17062
4.39831	1.1594
4.41707	1.20505
4.44305	1.18828
4.32597	1.2206
4.41651	1.21775
4.42214	1.22834
4.42495	1.18262
4.46742	1.21382
4.37261	1.18591
4.36186	1.17988
4.37913	1.19945
4.3953	1.24359
4.31325	1.22583
4.42501	1.21252
4.36922	1.20231
4.31309	1.23488
4.32856	1.23234
4.31645	1.19781
4.26483	1.21229
4.26343	1.22247
4.28733	1.19204
4.17841	1.22202
4.13778	1.2339
4.23624	1.24493
4.23596	1.24757
4.29854	1.23146
4.24952	1.26679
4.29922	1.25401
4.27428	1.20594
4.27807	1.25799
4.24929	1.26133
4.35599	1.25085
4.33685	1.18716
4.40136	1.2317
4.37017	1.24367
4.39265	1.20615
4.32355	1.24784
4.38811	1.24621
4.34988	1.25145
4.40829	1.25389
4.3258	1.24612
4.39089	1.23139
4.34144	1.23702
4.33095	1.22481
4.3227	1.25014
4.28913	1.16548
4.21901	1.20681
4.22226	1.20931
4.2542	1.19322
4.28974	1.1884
4.27953	1.20853
4.31635	1.18989
4.26999	1.19229
4.29487	1.20188
4.29238	1.22874
4.22916	1.25792
4.34953	1.23589
4.29745	1.26717
4.28828	1.23953
4.23452	1.23885
4.23092	1.24642
4.22524	1.21212
4.21696	1.18335
4.32581	1.24487
4.33006	1.24946
4.27695	1.25587
4.27442	1.25636
4.32219	1.20654
4.34165	1.24615
4.31345	1.19178
4.19356	1.18949
4.32179	1.21275
4.24722	1.21488
4.30053	1.21888
4.30078	1.21393
4.3351	1.16991
4.37939	1.16792
4.34939	1.19614
4.32802	1.22313
4.3366	1.24792
4.33279	1.20269
4.38206	1.2218
4.3087	1.22749
4.37594	1.24504
4.34939	1.22441
4.317	1.20677
4.26341	1.20467
4.29713	1.24776
4.28757	1.23342
4.33604	1.20349
4.30379	1.24099
4.33925	1.22408
4.40902	1.22629
4.26609	1.16278
4.22217	1.20363
4.27516	1.19552
4.29433	1.16646
4.26148	1.19565
4.27447	1.20391
4.24612	1.18065
4.2488	1.18624
4.26469	1.19137
4.27567	1.19536
4.34669	1.17706
4.34677	1.16362
4.32036	1.17002
4.37135	1.19075
4.40693	1.20087
4.42582	1.19466
4.38445	1.15375
4.40889	1.17819
4.36671	1.18667
4.40605	1.23356
4.41844	1.21722
4.38364	1.23788
4.328	1.2422
4.25386	1.20616
4.31113	1.20342
4.34617	1.21638
4.37036	1.2368
4.32992	1.24557
4.32739	1.20487
4.28908	1.19476
4.23448	1.21826
4.21683	1.19042
4.24627	1.18685
4.23952	1.22024
4.23719	1.23563
4.29287	1.19702
4.34373	1.22178
4.37067	1.20132
4.39447	1.21017
4.3067	1.19303
4.26521	1.1861
4.33172	1.187
4.34301	1.19522
4.26794	1.20885
4.28276	1.24637
4.34012	1.22164
4.38184	1.24418
4.39192	1.21856
4.28086	1.18
4.32535	1.20314
4.36906	1.19602
4.29933	1.15878
4.2845	1.16669
4.22581	1.16736
4.20304	1.21065
4.21806	1.18444
4.18431	1.18633
4.25238	1.19747
4.22742	1.22589
4.26454	1.23448
4.2767	1.23258
4.35673	1.20816
4.34518	1.19277
4.18491	1.18209
4.27817	1.16072
4.30994	1.1148
4.25024	1.16195
4.2284	1.16029
4.30079	1.18078
4.32852	1.18906
4.3211	1.18188
4.31486	1.20011
4.37001	1.20577
4.3159	1.23526
4.25699	1.21885
4.27988	1.20626
4.35132	1.20108
4.30071	1.17009
4.3284	1.1542
4.30624	1.16718
4.32805	1.16421
4.31093	1.20666
4.30965	1.17631
4.39933	1.23812
4.38827	1.26471
4.3352	1.20564
4.32983	1.17219
4.34203	1.23809
4.4236	1.24726
4.30515	1.1913
4.33266	1.17536
4.28989	1.17971
4.33474	1.23868
4.38132	1.20763
4.40306	1.22568
4.29263	1.23725
4.35767	1.18892
4.37451	1.19375
4.38636	1.20805
4.22408	1.1751
4.42993	1.19193
4.44672	1.21321
4.38887	1.21418
4.39726	1.21484
4.31877	1.19317
4.30339	1.23928
4.31731	1.22315
4.33337	1.21568
4.30323	1.20863
4.35531	1.21398
4.34825	1.19861
4.31893	1.20242
4.29739	1.19251
4.3135	1.1754
4.38198	1.22342
4.4	1.21463
4.37675	1.22891
4.38311	1.18529
4.40285	1.17828
4.36869	1.18515
4.34761	1.19007
4.41674	1.20328
4.35163	1.19841
4.3693	1.23159
4.36656	1.20365
4.29876	1.20891
4.29085	1.21623
4.34287	1.21753
4.33762	1.21935
4.35368	1.18013
4.3815	1.14468
4.37199	1.19185
4.43948	1.18463
4.42487	1.17021
4.38302	1.20581
4.41529	1.22409
4.38396	1.18924
4.37877	1.16646
4.34735	1.18271
4.39935	1.20877
4.36939	1.2363
4.4068	1.24543
4.39555	1.21984
4.38977	1.23002
4.3914	1.22605
4.36286	1.17616
4.37943	1.16076
4.31929	1.17895
[truncated: 1,503 more rows]

## Sheet: Reverse Ensembles
**Timescale = 0.4 ms
WT	R712L
3.32095	1.2223
3.32095	1.22144
3.32095	1.22298
3.32095	1.22314
3.32095	1.22128
3.32095	1.2218
3.32095	1.22122
3.32095	1.21987
3.32095	1.22019
3.32095	1.22104
3.32095	1.22191
3.32095	1.22256
3.32095	1.22226
3.32095	1.22162
3.32095	1.22264
3.32095	1.22202
3.32095	1.22191
3.32095	1.22254
3.32095	1.22282
3.32095	1.22292
3.32095	1.2223
3.32095	1.2221
3.32095	1.22213
3.32095	1.22212
3.32095	1.22238
3.32095	1.22253
3.32095	1.22252
3.32095	1.22314
3.32095	1.2235
3.32095	1.22328
3.32095	1.22429
3.32095	1.22296
3.32095	1.22158
3.32095	1.22231
3.32095	1.2219
3.32095	1.22192
3.32095	1.22138
3.32095	1.22152
3.32095	1.22058
3.32095	1.22106
3.32095	1.22321
3.32095	1.22197
3.32095	1.2218
3.32095	1.2219
3.32095	1.22269
3.32095	1.22339
3.32095	1.22246
3.32095	1.22191
3.32095	1.22135
3.32095	1.22144
3.32095	1.22172
3.32095	1.2218
3.32095	1.22276
3.32095	1.22265
3.32095	1.22201
3.32095	1.22116
3.32095	1.22179
3.32095	1.22188
3.32095	1.22193
3.32095	1.2219
3.32095	1.22252
3.32095	1.22189
3.32095	1.22178
3.32095	1.2224
3.32095	1.2223
3.32095	1.22272
3.32095	1.22234
3.32095	1.22197
3.32095	1.22151
3.32095	1.22241
3.32095	1.22275
3.32095	1.2224
3.32095	1.22165
3.32095	1.22274
3.32095	1.22218
3.32095	1.22239
3.32095	1.22214
3.32095	1.2221
3.32095	1.2243
3.32095	1.22209
3.32095	1.22283
3.32095	1.22257
3.32095	1.22239
3.32095	1.22289
3.32095	1.22167
3.32095	1.22043
3.32095	1.2214
3.32095	1.22125
3.32095	1.22154
3.32095	1.22156
3.32095	1.22236
3.32095	1.22164
3.32095	1.22115
3.32095	1.22011
3.32095	1.21991
3.32095	1.22115
3.32095	1.22085
3.32095	1.22121
3.32095	1.22198
3.32095	1.22185
3.32095	1.2232
3.32095	1.22278
3.32095	1.22293
3.32095	1.22218
3.32095	1.22189
3.32095	1.22331
3.32095	1.22282
3.32095	1.22252
3.32095	1.22217
3.32095	1.22208
3.32095	1.22185
3.32095	1.22294
3.32095	1.22379
3.32095	1.22353
3.32095	1.22392
3.32095	1.22172
3.32095	1.22037
3.32095	1.22102
3.32095	1.22267
3.32095	1.22239
3.32095	1.22149
3.32095	1.22067
3.32095	1.22176
3.32095	1.22187
3.32095	1.22138
3.32095	1.2213
3.32095	1.22259
3.32095	1.22268
3.32095	1.22138
3.32095	1.22315
3.32095	1.22281
3.32095	1.22096
3.32095	1.2212
3.32095	1.22203
3.32095	1.22176
3.32095	1.22144
3.32095	1.22273
3.32095	1.22298
3.32095	1.22301
3.32095	1.22257
3.32095	1.2219
3.32095	1.22146
3.32095	1.22211
3.32095	1.22215
3.32095	1.22314
3.32095	1.22186
3.32095	1.22229
3.32095	1.22325
3.32095	1.223
3.32095	1.22324
3.32095	1.22339
3.32095	1.22258
3.32095	1.22316
3.32095	1.22212
3.32095	1.2222
3.32095	1.22241
3.32095	1.22265
3.32095	1.22307
3.32095	1.22235
3.32095	1.22111
3.32095	1.22145
3.32095	1.22154
3.32095	1.22207
3.32095	1.22284
3.32095	1.22182
3.32095	1.22267
3.32095	1.22292
3.32095	1.22287
3.32095	1.22178
3.32095	1.22126
3.32095	1.22228
3.32095	1.22168
3.32095	1.22186
3.32095	1.22194
3.32095	1.22071
3.32095	1.22126
3.32095	1.22257
3.32095	1.22255
3.32095	1.22193
3.32095	1.22093
3.32095	1.22213
3.32095	1.22272
3.32095	1.22294
3.32095	1.22322
3.32095	1.22246
3.32095	1.22311
3.32095	1.22267
3.32095	1.22299
3.32095	1.22239
3.32095	1.22176
3.32095	1.2224
3.32095	1.22143
3.32095	1.22124
3.32095	1.22157
3.32095	1.22094
3.32095	1.2203
3.32095	1.22186
3.32095	1.22217
3.32095	1.22225
3.32095	1.22261
3.32095	1.22195
3.32095	1.22149
3.32095	1.22158
3.32095	1.22161
3.32095	1.22187
3.32095	1.22121
3.32095	1.22256
3.32095	1.22234
3.32095	1.22111
3.32095	1.22135
3.32095	1.22222
3.32095	1.22281
3.32095	1.22173
3.32095	1.22136
3.32095	1.22231
3.32095	1.22305
3.32095	1.22114
3.32095	1.22164
3.32095	1.22151
3.32095	1.22127
3.32095	1.22217
3.32095	1.22198
3.32095	1.22183
3.32095	1.22227
3.32095	1.22323
3.32095	1.22256
3.32095	1.22193
3.32095	1.22279
3.32095	1.22164
3.32095	1.22203
3.32095	1.22092
3.32095	1.22039
3.32095	1.22102
3.32095	1.22224
3.32095	1.22223
3.32095	1.22306
3.32095	1.22284
3.32095	1.22292
3.32095	1.22202
3.32095	1.22095
3.32095	1.22108
3.32095	1.22193
3.32095	1.22182
3.32095	1.2225
3.32095	1.2215
3.32095	1.22223
3.32095	1.22235
3.32095	1.22112
3.32095	1.22275
3.32095	1.22271
3.32095	1.22188
3.32095	1.22302
3.32095	1.22204
3.32095	1.22186
3.32095	1.22164
3.32095	1.22175
3.32095	1.22369
3.32095	1.22287
3.32095	1.22326
3.32095	1.22175
3.32095	1.22205
3.32095	1.22268
3.32095	1.22162
3.32095	1.22187
3.32095	1.22267
3.32095	1.22399
3.32095	1.22437
3.32095	1.22315
3.32095	1.22361
3.32095	1.22252
3.32095	1.2222
3.32095	1.22294
3.32095	1.22237
3.32095	1.22214
3.32095	1.22184
3.32095	1.22207
3.32095	1.22274
3.32095	1.22173
3.32095	1.22099
3.32095	1.22075
3.32095	1.22031
3.32095	1.22109
3.32095	1.22142
3.32095	1.22294
3.32095	1.22145
3.32095	1.22145
3.32095	1.2217
3.32095	1.22171
3.32095	1.22203
3.32095	1.22226
3.32095	1.2215
3.32095	1.22241
3.32095	1.22245
3.32095	1.22107
3.32095	1.22211
3.32095	1.22266
3.32095	1.22257
3.32095	1.22219
3.32095	1.22217
3.32095	1.22398
3.32095	1.22237
3.32095	1.2222
3.32095	1.22274
3.32095	1.22253
3.32095	1.22273
3.32095	1.22257
3.32095	1.22157
3.32095	1.2231
3.32095	1.22233
3.32095	1.22234
3.32095	1.22167
3.32095	1.2222
3.32095	1.22135
3.32095	1.22264
3.32095	1.22114
3.32095	1.22166
3.32095	1.22233
3.32095	1.22267
3.32095	1.2222
3.32095	1.2225
3.32095	1.22236
3.32095	1.22205
3.32095	1.22281
3.32095	1.22165
3.32095	1.22267
3.32095	1.22293
3.32095	1.22202
3.32095	1.22117
3.32095	1.22186
3.32095	1.22196
3.32095	1.22145
3.32095	1.22176
3.32095	1.22249
3.32095	1.22176
3.32095	1.22208
3.32095	1.22207
3.32095	1.22262
3.32095	1.22243
3.32095	1.22193
3.32095	1.22172
3.32095	1.22206
3.32095	1.22185
3.32095	1.22195
3.32095	1.22198
3.32095	1.2217
3.32095	1.22334
3.32095	1.22289
3.32095	1.22243
3.32095	1.22242
3.32095	1.22294
3.32095	1.22199
3.32095	1.22238
3.32095	1.22298
3.32095	1.22295
3.32095	1.22269
3.32095	1.22249
3.32095	1.22153
3.32095	1.22206
3.32095	1.22272
3.32095	1.22251
3.32095	1.22354
3.32095	1.22368
3.32095	1.22329
3.32095	1.22195
3.32095	1.22185
3.32095	1.22222
3.32095	1.22115
3.32095	1.22204
3.32095	1.22247
3.32095	1.22258
3.32095	1.22299
3.32095	1.22235
3.32095	1.2227
3.32095	1.22283
3.32095	1.22172
3.32095	1.22187
3.32095	1.22229
3.32095	1.22278
3.32095	1.2206
3.32095	1.22048
3.32095	1.22164
3.32095	1.22099
3.32095	1.22183
3.32095	1.22187
3.32095	1.22171
3.32095	1.22211
3.32095	1.22201
3.32095	1.2217
3.32095	1.22237
3.32095	1.22132
3.32095	1.22068
3.32095	1.22144
3.32095	1.22147
3.32095	1.22171
3.32095	1.22149
3.32095	1.21979
3.32095	1.22135
3.32095	1.22066
3.32095	1.22166
3.32095	1.22042
3.32095	1.22074
3.32095	1.22155
3.32095	1.22158
3.32095	1.2223
3.32095	1.22146
3.32095	1.22151
3.32095	1.22201
3.32095	1.22156
3.32095	1.22213
3.32095	1.22302
3.32095	1.22272
3.32095	1.22216
3.32095	1.22244
3.32095	1.2222
3.32095	1.22211
3.32095	1.2222
3.32095	1.22231
3.32095	1.2224
3.32095	1.22267
3.32095	1.22229
3.32095	1.22201
3.32095	1.22076
3.32095	1.22097
3.32095	1.22057
3.32095	1.22085
3.32095	1.22239
3.32095	1.22261
3.32095	1.22199
3.32095	1.22127
3.32095	1.22191
3.32095	1.22255
3.32095	1.22116
3.32095	1.22097
3.32095	1.22082
3.32095	1.22191
3.32095	1.22065
3.32095	1.22183
3.32095	1.22147
3.32095	1.22233
3.32095	1.22279
3.32095	1.22318
3.32095	1.22337
3.32095	1.22184
3.32095	1.22239
3.32095	1.22239
3.32095	1.22245
3.32095	1.22336
3.32095	1.22194
3.32095	1.2225
3.32095	1.22139
3.32095	1.22116
3.32095	1.22207
3.32095	1.22226
3.32095	1.22219
3.32095	1.22164
3.32095	1.22136
3.32095	1.2222
3.32095	1.22147
3.32095	1.22125
3.32095	1.22308
3.32095	1.22195
3.32095	1.22161
3.32095	1.22179
3.32095	1.22241
3.32095	1.2225
3.32095	1.22218
3.32095	1.22304
3.32095	1.22331
3.32095	1.22253
3.32095	1.22202
3.32095	1.22252
3.32095	1.22214
3.32095	1.2215
3.32095	1.22293
3.32095	1.2224
3.32095	1.22332
3.32095	1.22342
3.32095	1.22321
3.32095	1.22281
3.32095	1.22228
3.32095	1.22279
3.32095	1.22219
3.32095	1.22234
3.32095	1.22174
3.32095	1.22299
3.32095	1.22226
3.32095	1.22206
3.32095	1.22196
3.32095	1.22206
3.32095	1.22217
3.32095	1.22226
3.32095	1.22084
3.32095	1.22249
3.32095	1.22269
3.32095	1.22152
3.32095	1.2215
3.32095	1.22242
3.32095	1.22225
3.32095	1.22204
3.32095	1.22193
3.32095	1.22177
3.32095	1.22221
3.32095	1.22297
3.32095	1.22216
3.32095	1.22197
3.32095	1.2232
3.32095	1.22197
3.32095	1.22243
3.32095	1.22245
3.32095	1.22412
3.32095	1.22409
3.32095	1.2235
3.32095	1.22295
3.32095	1.22298
3.32095	1.2224
3.32095	1.22264
3.32095	1.22393
3.32095	1.22312
3.32095	1.22296
3.32095	1.22297
3.32095	1.22266
3.32095	1.22305
3.32095	1.22323
3.32095	1.22315
3.32095	1.22285
3.32095	1.22301
3.32095	1.22267
3.32095	1.22276
3.32095	1.2222
3.32095	1.22206
3.32095	1.22319
3.32095	1.22268
3.32095	1.22238
3.32095	1.22189
3.32095	1.22304
3.32095	1.22206
3.32095	1.22253
3.32095	1.22201
3.32095	1.22273
3.32095	1.22256
3.32095	1.22261
3.32095	1.22265
3.32095	1.22276
3.32095	1.22318
3.32095	1.22292
3.32095	1.22326
3.32095	1.22312
3.32095	1.22295
3.32095	1.22236
3.32095	1.22391
3.32095	1.2227
3.32095	1.2223
3.32095	1.22194
3.32095	1.2222
3.32095	1.22247
3.32095	1.22274
3.32095	1.22407
3.32095	1.22317
3.32095	1.22383
3.32095	1.2229
3.32095	1.22319
3.32095	1.22435
3.32095	1.2241
3.32095	1.22282
3.32095	1.2216
3.32095	1.22146
3.32095	1.22173
3.32095	1.22309
3.32095	1.22277
3.32095	1.22384
3.32095	1.22415
3.32095	1.22354
3.32095	1.22312
3.32095	1.22353
3.32095	1.22258
3.32095	1.22216
3.32095	1.22285
3.32095	1.22349
3.32095	1.22221
3.32095	1.22376
3.32096	1.224
3.32091	1.22384
3.32106	1.22367
3.32067	1.22358
3.3215	1.22357
3.31967	1.22356
3.32901	1.22343
3.32622	1.22441
3.32343	1.22425
3.33009	1.22223
3.33029	1.22262
3.32999	1.22353
3.33811	1.22219
3.32807	1.22351
3.33078	1.22301
3.33132	1.22307
3.32502	1.2227
3.32827	1.22283
3.33404	1.22213
3.3386	1.2215
3.34323	1.22332
3.34153	1.22516
3.33821	1.22396
3.34653	1.23175
3.33339	1.22662
3.33996	1.22989
3.3326	1.21921
3.34593	1.22674
3.33877	1.2231
3.32769	1.21478
3.32106	1.21664
3.32669	1.20911
3.33094	1.21676
3.33802	1.2305
3.33523	1.22694
3.3376	1.22529
3.34579	1.22836
3.34114	1.23221
3.33104	1.22705
3.331	1.22217
3.33412	1.22277
3.33314	1.21393
3.33367	1.2158
3.33647	1.2127
3.34237	1.22904
3.33384	1.22414
3.33074	1.22124
3.33857	1.23104
3.33637	1.22761
3.34323	1.22624
3.342	1.22696
3.33301	1.22882
3.33772	1.22579
3.33554	1.21905
3.34015	1.2262
3.3408	1.22209
3.34363	1.21923
3.34448	1.2283
3.34808	1.22504
3.34869	1.22833
3.34319	1.22755
3.3397	1.22697
3.34441	1.22641
3.32835	1.21658
3.33322	1.22118
3.333	1.22082
3.33361	1.22
3.3355	1.22
3.33524	1.22175
3.33834	1.21729
3.33941	1.22112
3.33189	1.22746
3.33265	1.22094
3.33611	1.2291
3.3321	1.22639
3.33243	1.2364
3.33575	1.23818
3.33092	1.23533
3.32735	1.23271
3.34687	1.2258
3.34838	1.23538
3.34597	1.23284
3.34547	1.22834
3.34308	1.2313
3.34422	1.2293
3.33862	1.21999
3.34072	1.21959
3.34109	1.21873
3.34057	1.22453
3.33463	1.22527
3.33839	1.22607
3.3306	1.2216
3.33611	1.225
3.34101	1.21949
3.33578	1.21135
3.33473	1.21197
3.33966	1.22207
3.33154	1.22683
3.32505	1.21814
3.33517	1.2261
3.33771	1.23588
3.32739	1.22159
3.33437	1.22631
3.3288	1.23424
3.33289	1.22723
3.33317	1.22533
3.33527	1.22361
3.33532	1.2214
3.33313	1.2294
3.33952	1.22755
3.33358	1.22381
3.3374	1.22861
3.33019	1.21778
3.33216	1.2177
3.34216	1.22823
3.34762	1.22852
3.34103	1.23143
3.3399	1.23492
3.34271	1.22514
3.33183	1.21878
3.3339	1.22103
3.33788	1.22528
3.3374	1.22329
3.33979	1.23511
3.33301	1.23094
3.32713	1.22643
3.33052	1.22355
3.33855	1.22021
3.33701	1.22201
3.3336	1.22212
3.3346	1.22049
3.32645	1.21847
3.33198	1.22084
3.33529	1.22399
3.33587	1.22399
3.32818	1.22871
3.32631	1.22514
3.33581	1.22372
3.33622	1.22146
3.34139	1.21761
3.33595	1.21771
3.33497	1.21898
3.33263	1.21433
3.3347	1.21936
3.33624	1.22039
3.33788	1.21651
3.34243	1.21717
3.33785	1.2211
3.33853	1.2179
3.33553	1.2146
3.33631	1.21044
3.3346	1.21221
3.34222	1.20901
3.34082	1.21084
3.34651	1.2185
3.34301	1.21891
3.34513	1.22129
3.34278	1.2164
3.33968	1.224
3.33826	1.22267
3.33717	1.2177
3.33532	1.21511
3.34009	1.214
3.33557	1.21601
3.33415	1.21652
3.34095	1.20765
3.34087	1.22275
3.33876	1.22123
3.34142	1.21966
3.33713	1.22802
3.34031	1.22112
3.34409	1.22685
3.33873	1.22785
3.33754	1.23179
3.33903	1.23443
3.3344	1.22596
3.33368	1.22902
3.33448	1.23074
3.33677	1.23031
3.33803	1.22917
3.33429	1.23447
3.33832	1.23315
3.34427	1.22202
3.34631	1.23062
3.33179	1.22448
3.33006	1.22717
3.3306	1.21725
3.33272	1.22296
3.34268	1.23398
3.32882	1.22819
3.33198	1.22224
3.33781	1.22177
3.34041	1.23335
3.34577	1.22515
3.34649	1.2309
3.3431	1.21573
3.34748	1.21693
3.34574	1.22974
3.34901	1.23002
3.35173	1.23038
3.33913	1.23255
3.33973	1.22888
3.33091	1.23823
3.32723	1.23743
3.33602	1.2336
3.3253	1.23831
3.33299	1.23805
3.33205	1.23738
3.32653	1.2226
3.34159	1.21933
3.34137	1.22591
3.34449	1.2196
3.35089	1.22186
3.34114	1.22639
3.35149	1.23305
3.3405	1.23639
3.34102	1.22586
3.33344	1.22888
3.33047	1.22408
3.34178	1.21617
3.33665	1.21596
3.33732	1.20824
3.34209	1.20996
3.3429	1.22088
3.34141	1.22453
3.3405	1.22189
3.33605	1.22786
3.33778	1.22325
3.3365	1.22117
3.34458	1.21902
3.34029	1.22106
3.33977	1.23155
3.33437	1.2237
3.33611	1.23702
3.33759	1.22365
3.34313	1.22174
3.33942	1.22191
3.33645	1.22101
3.33646	1.228
3.33398	1.23638
3.33021	1.22935
3.33394	1.22791
3.33081	1.23297
3.33311	1.22214
3.33483	1.22494
3.33412	1.2251
3.32772	1.22083
3.33358	1.22067
3.32922	1.2203
3.32771	1.22305
3.34059	1.21974
3.33437	1.21843
3.33473	1.22217
3.33951	1.2242
3.32941	1.22123
3.34022	1.22245
3.3312	1.21775
3.33334	1.22605
3.3337	1.22628
3.33413	1.22411
3.32976	1.23359
3.33147	1.22715
3.33349	1.23119
3.33027	1.23209
3.34051	1.22586
3.33721	1.22949
3.34262	1.23022
3.33722	1.23632
3.33098	1.22382
3.33321	1.22846
3.32942	1.22779
3.33237	1.22894
3.33461	1.22456
3.33884	1.22609
3.3401	1.22913
3.34482	1.22935
3.33766	1.23094
3.33414	1.22754
3.33578	1.2295
3.3403	1.23039
3.33877	1.22885
3.33401	1.22258
3.33082	1.21494
3.33283	1.21792
3.33404	1.2237
3.33252	1.22343
3.33201	1.21923
3.33601	1.22465
3.34085	1.22647
3.33647	1.22922
3.33883	1.23346
3.34229	1.22875
3.34353	1.22807
3.34452	1.22811
3.34098	1.2226
3.33373	1.21441
3.33734	1.2184
3.33138	1.22244
3.3326	1.22401
3.34585	1.22832
3.33327	1.23107
3.34167	1.22792
3.34068	1.22796
3.34297	1.22659
3.3381	1.2302
3.33038	1.23504
3.33442	1.22136
3.33838	1.22249
3.34098	1.22207
3.34243	1.22245
3.33934	1.21765
3.34221	1.21332
3.3458	1.22884
3.33742	1.22822
3.33787	1.22709
3.33932	1.22769
3.33975	1.22198
3.33837	1.22851
3.34195	1.22899
3.33564	1.22731
3.33257	1.22698
3.325	1.22619
3.3391	1.23213
3.334	1.22535
3.33585	1.22602
3.32899	1.22391
3.32782	1.23316
3.34397	1.23247
3.34569	1.22847
3.336	1.23593
3.33562	1.22709
3.33836	1.22168
3.33548	1.22078
3.33756	1.21735
3.3352	1.22174
3.32668	1.22111
3.32639	1.21495
3.33142	1.23001
3.34383	1.22416
3.3316	1.22396
3.32713	1.22478
3.33416	1.23314
3.32815	1.23518
3.33196	1.22755
3.32992	1.23661
3.34108	1.23095
3.33782	1.2323
3.32389	1.23269
3.33107	1.23524
3.32427	1.2275
3.32487	1.22896
3.33704	1.21705
3.33318	1.22134
3.33661	1.2201
3.33553	1.22225
3.33213	1.22226
3.33348	1.22536
3.32677	1.22109
3.32876	1.22811
3.3304	1.22231
3.32653	1.21921
3.33719	1.22173
3.33488	1.21956
3.3447	1.22025
3.33983	1.21361
3.33744	1.22106
3.33169	1.22909
3.32374	1.22621
3.33333	1.2405
3.33254	1.23191
3.33167	1.22937
3.32823	1.22555
3.32692	1.21424
3.32441	1.23231
3.32534	1.22606
3.33204	1.2236
3.33078	1.22585
3.31576	1.23194
3.32685	1.22962
3.3299	1.22394
3.3331	1.22478
3.33892	1.22702
3.32643	1.23103
3.32633	1.22996
3.33459	1.22493
3.33547	1.22943
3.33482	1.22391
3.33711	1.22493
3.32826	1.22435
3.32754	1.22313
3.34114	1.21376
3.34399	1.22123
3.34138	1.23165
3.34514	1.22963
3.33797	1.22426
3.33507	1.22623
3.32906	1.22796
3.33631	1.23195
3.32964	1.2285
3.32866	1.23497
3.33499	1.22881
3.33018	1.23469
3.33674	1.2363
3.32162	1.22971
3.32681	1.22601
3.3197	1.2135
3.32099	1.22245
3.33532	1.22567
3.33661	1.22771
3.32437	1.23219
3.33009	1.23426
3.33875	1.22904
3.33454	1.2332
3.34667	1.24402
3.34164	1.23027
3.32943	1.2155
3.3336	1.21643
3.33316	1.21042
3.33005	1.21348
3.33213	1.2254
3.34114	1.22526
3.33502	1.21916
3.34043	1.22847
3.34361	1.22911
3.33941	1.22882
3.34078	1.23019
3.33021	1.23364
3.33447	1.2358
3.33036	1.22295
3.32599	1.21435
3.33577	1.22046
3.33492	1.22404
3.33433	1.23084
3.34094	1.23143
3.34271	1.22734
3.34254	1.23202
3.33642	1.23245
3.34154	1.22425
3.33144	1.22238
3.33523	1.23243
3.3433	1.2197
3.3298	1.21669
3.33209	1.22355
3.34148	1.22825
3.33676	1.22653
3.33163	1.22063
3.32922	1.23515
3.33115	1.22885
3.32878	1.22322
3.34029	1.22709
3.34483	1.2227
3.34184	1.22666
3.33771	1.2185
3.34749	1.21263
3.34539	1.21056
3.35143	1.22447
3.35165	1.22086
3.34714	1.22766
3.34318	1.23123
3.33426	1.22672
3.33581	1.2274
3.34032	1.22493
3.33623	1.22538
3.33553	1.22267
3.32474	1.22784
3.33226	1.22766
3.33481	1.2331
3.3253	1.24131
3.32423	1.23521
3.33216	1.21752
3.33413	1.21703
3.32066	1.22653
3.32671	1.22099
3.34459	1.22572
3.33065	1.21901
3.33525	1.22027
3.3357	1.21859
3.3364	1.21693
3.34093	1.22082
3.34229	1.22316
3.33736	1.23272
3.33708	1.23278
3.34044	1.22802
3.33672	1.22087
3.33758	1.23139
3.33268	1.22401
3.33776	1.22232
3.33126	1.22702
3.33474	1.22236
3.34634	1.21922
3.34216	1.22022
3.33595	1.22584
3.33623	1.22999
3.33053	1.22957
3.33536	1.22374
3.34214	1.21797
3.34002	1.22702
3.33655	1.22848
3.34432	1.2047
3.3453	1.21848
3.33329	1.22904
3.33474	1.21783
3.32434	1.20753
3.33261	1.2122
3.33082	1.21814
3.33967	1.20523
3.33423	1.20837
3.34421	1.21273
3.333	1.21087
3.3313	1.20526
3.33132	1.2031
3.33265	1.21791
3.32987	1.22646
3.33649	1.21749
3.33605	1.21634
3.33958	1.21868
3.33453	1.20616
3.33116	1.21216
3.34104	1.21368
3.33192	1.22512
3.33732	1.23029
3.33025	1.22218
3.33572	1.22217
3.33118	1.22213
3.33363	1.21358
3.34061	1.21427
3.33742	1.20734
3.33622	1.20869
3.34112	1.20622
3.34512	1.20394
3.33691	1.20406
3.33575	1.21443
3.34903	1.21098
3.33962	1.21204
3.33262	1.2143
3.33107	1.22014
3.33432	1.2262
3.32514	1.21225
3.32587	1.22167
3.33091	1.21442
3.33969	1.21548
3.33059	1.21377
3.3224	1.20877
3.3319	1.20788
3.3265	1.20539
3.32739	1.19238
3.33452	1.20149
3.33247	1.19542
3.33118	1.2121
3.33418	1.22302
3.32649	1.21287
3.33032	1.20391
3.3422	1.21546
3.33853	1.206
3.33376	1.21461
3.32675	1.22594
3.32248	1.2356
3.32349	1.2363
3.3173	1.21621
3.32087	1.20372
3.33077	1.21491
3.32506	1.20505
3.32495	1.19903
3.33778	1.20265
3.34449	1.21069
3.32888	1.21767
3.32433	1.22358
3.33814	1.20989
3.32462	1.22152
3.3316	1.21722
3.3293	1.21255
3.33377	1.21278
3.33571	1.19499
3.33612	1.19726
3.34277	1.20419
3.33913	1.19628
3.33838	1.21826
3.33221	1.20909
3.33938	1.21458
3.33583	1.21137
3.33706	1.2214
3.33983	1.22667
3.32979	1.21727
3.32933	1.22436
3.33403	1.22414
3.33849	1.23302
3.33452	1.21659
3.33438	1.19953
3.33962	1.21319
3.33458	1.20974
3.34135	1.21768
3.33982	1.23411
3.34945	1.22454
3.33958	1.23781
3.33745	1.2317
3.33065	1.20492
3.32828	1.2088
3.34131	1.20027
3.33178	1.20895
3.33381	1.2092
3.32684	1.22645
3.32825	1.22034
3.33704	1.21377
3.33017	1.2162
3.34061	1.20905
3.3346	1.21974
3.33366	1.21576
3.33094	1.20405
3.33096	1.22453
3.32913	1.22876
3.32811	1.22028
3.3362	1.21417
3.33269	1.21443
3.33713	1.21452
3.33597	1.21887
3.34115	1.23075
3.34221	1.21489
3.33424	1.20281
3.33575	1.22916
3.33999	1.23239
3.34432	1.22619
3.33319	1.22463
3.33585	1.22673
3.33093	1.22907
3.34062	1.22155
3.34551	1.23095
3.33592	1.21339
3.3454	1.23243
3.33824	1.21365
3.33562	1.20348
3.33294	1.21303
3.32998	1.20092
3.33487	1.19709
3.32812	1.21538
3.32481	1.23178
3.32827	1.20404
3.32879	1.21586
3.33511	1.23442
3.34315	1.22108
3.32823	1.21395
3.33578	1.21325
3.34243	1.2196
3.33826	1.21663
3.335	1.21333
3.33703	1.1941
3.3315	1.21541
3.32637	1.21784
3.33845	1.20228
3.33833	1.21104
3.34731	1.21434
3.34624	1.20541
3.33698	1.21885
3.34132	1.2254
3.32997	1.2127
3.33582	1.20896
3.33869	1.21887
3.33008	1.22183
3.32952	1.20924
3.33613	1.20429
3.33456	1.20846
3.33868	1.19692
3.33215	1.20749
3.33788	1.2134
3.32936	1.21204
3.32839	1.21837
3.32829	1.21793
3.32413	1.21315
3.32074	1.22217
3.3232	1.21724
3.33495	1.21402
3.33357	1.21994
3.33071	1.22027
3.33548	1.22232
3.3386	1.20866
3.3372	1.21433
3.32845	1.21777
3.32427	1.22551
3.32133	1.24937
3.33074	1.21334
3.33022	1.22402
3.32798	1.22609
3.34015	1.22304
3.32754	1.20892
3.32219	1.2074
3.32251	1.20708
3.32901	1.21159
3.32466	1.21886
3.329	1.22023
3.33616	1.21164
3.32852	1.2158
3.32781	1.21751
3.33333	1.20782
3.34058	1.20741
3.33917	1.21799
3.34032	1.22347
3.34165	1.22185
3.3429	1.2245
3.34123	1.21777
3.33931	1.20636
3.34318	1.20481
3.33481	1.20221
3.33198	1.20649
3.32892	1.20775
3.33746	1.20971
3.32957	1.21535
3.32899	1.22168
3.32955	1.21886
3.33434	1.23472
3.33737	1.22699
3.33422	1.21153
3.32976	1.20068
3.33474	1.20096
3.33541	1.19145
3.33997	1.20511
3.34214	1.19892
3.35143	1.2061
3.34643	1.21146
3.33809	1.20553
3.32399	1.213
3.32486	1.22366
3.32872	1.2184
3.33141	1.2092
3.33386	1.22106
3.3292	1.21908
3.33552	1.20801
3.34245	1.21126
3.33567	1.20137
3.33464	1.20445
3.33087	1.19269
3.33271	1.20711
3.33164	1.21192
3.33579	1.21409
3.3307	1.21102
3.32855	1.21544
3.33562	1.22
3.33251	1.21307
3.32433	1.21559
3.3365	1.21479
3.33674	1.2124
3.33558	1.20325
3.34403	1.19595
3.34033	1.2051
3.33014	1.19321
3.32879	1.20936
3.32795	1.19645
3.32944	1.20839
3.32687	1.22499
3.33139	1.21218
3.33059	1.21479
3.32682	1.2234
3.33461	1.2232
3.33341	1.22599
3.32955	1.22886
3.33164	1.23142
3.33316	1.21831
3.33325	1.22303
3.33585	1.21281
3.32908	1.21574
3.32868	1.21934
3.32986	1.20694
3.33372	1.21059
3.33486	1.21542
3.33364	1.21959
3.3268	1.21913
3.32788	1.22865
3.33883	1.23617
3.33379	1.21703
3.33864	1.21047
3.32989	1.21505
3.33687	1.1914
3.34154	1.18172
3.33239	1.19704
3.33413	1.20509
3.32587	1.21028
3.33204	1.21916
3.33595	1.22256
3.32718	1.21009
3.33343	1.20666
3.33103	1.20989
3.33687	1.20819
3.33521	1.21091
3.33361	1.20067
3.34358	1.20328
3.33592	1.20781
3.33387	1.21575
3.33299	1.21063
3.32994	1.21073
3.33199	1.21298
3.33466	1.20342
3.33953	1.20686
3.33367	1.22007
3.331	1.21257
3.33055	1.20934
3.32713	1.2188
3.33244	1.21695
3.33024	1.19586
3.32192	1.19678
3.32599	1.22768
3.32356	1.23529
3.32685	1.24407
3.31478	1.22916
3.3355	1.203
3.32859	1.20794
3.32303	1.21449
3.33788	1.20266
3.3435	1.19945
3.3474	1.22692
3.35533	1.22649
3.35661	1.21972
3.32359	1.21981
3.32138	1.22362
3.35143	1.22024
3.33992	1.21229
3.34598	1.20281
3.33884	1.20201
3.36034	1.21482
3.35788	1.20513
3.33697	1.1997
3.33192	1.20305
3.33235	1.20067
3.33278	1.19398
3.33474	1.19189
3.32591	1.19785
3.37103	1.19411
3.34954	1.19218
3.31601	1.19673
3.33096	1.20125
3.32383	1.19938
3.32205	1.19069
3.35105	1.20113
3.33395	1.20128
3.32484	1.22055
3.33077	1.21475
3.31327	1.20961
3.32374	1.22247
3.31896	1.22239
3.34253	1.20948
3.33155	1.20685
3.31958	1.21327
3.33855	1.21522
3.3388	1.20951
3.3349	1.21019
3.33168	1.21212
3.31623	1.21959
3.32088	1.2146
3.32108	1.21185
3.32688	1.21099
3.34261	1.21335
3.33011	1.20404
3.34851	1.20989
3.35119	1.19443
3.35208	1.20337
3.34568	1.19737
3.33286	1.1933
3.33074	1.18738
3.34338	1.18892
3.34307	1.19682
3.34269	1.20022
3.32636	1.21872
3.33486	1.21574
3.33749	1.2245
3.33854	1.22163
3.349	1.23119
3.33454	1.23091
3.33606	1.22295
3.34517	1.22153
3.32444	1.22242
3.33733	1.21872
3.35072	1.21437
3.35533	1.2168
3.34468	1.20954
3.3398	1.21
3.3502	1.19561
3.34801	1.21228
3.34738	1.21148
3.33943	1.22012
3.3423	1.23691
3.34849	1.21569
3.341	1.21593
3.3434	1.21369
3.35646	1.21936
3.35357	1.1981
3.35915	1.21311
3.33701	1.22318
3.33714	1.20822
3.3422	1.21874
3.35084	1.21438
3.35289	1.21218
3.36341	1.21037
3.37588	1.21595
3.35509	1.206
3.35487	1.20092
3.34703	1.20299
3.34694	1.21815
3.34612	1.23099
3.36167	1.22782
3.33164	1.21816
3.32734	1.22511
3.34991	1.2238
3.36605	1.22988
3.34968	1.21141
3.35151	1.2193
3.3338	1.22008
3.33369	1.21532
3.3482	1.2182
3.33762	1.21406
3.33563	1.19767
3.32591	1.19584
3.33329	1.18856
3.33989	1.19726
3.33807	1.20227
3.31933	1.20203
3.31068	1.20515
3.32181	1.22102
3.33657	1.20772
3.33137	1.19862
3.32653	1.1995
3.33851	1.21767
3.33252	1.21832
3.31408	1.22394
3.32559	1.22785
3.32164	1.20758
3.32797	1.22385
3.33686	1.21403
3.34775	1.21533
3.34114	1.21527
3.35366	1.23563
3.34816	1.2256
3.35971	1.21605
3.35022	1.23149
3.3536	1.2066
3.34818	1.20531
3.34328	1.20481
3.34669	1.20566
3.33993	1.20547
3.36261	1.19914
3.34967	1.22919
3.35182	1.20114
3.33867	1.21006
3.34125	1.20303
3.34869	1.18244
3.34553	1.19202
3.33366	1.2026
3.3218	1.21632
3.31391	1.19986
3.32004	1.21082
3.32579	1.21787
3.33241	1.2134
3.34528	1.2287
3.34776	1.21452
3.35642	1.20557
3.33408	1.2117
3.33567	1.21068
3.32677	1.20361
3.34246	1.1982
3.34612	1.21288
3.32396	1.20394
3.32726	1.21462
3.32562	1.2142
3.33053	1.22208
3.32371	1.21817
3.3244	1.21652
3.32522	1.22381
3.32929	1.22577
3.33092	1.23695
3.32874	1.21889
3.33932	1.20773
3.34091	1.21466
3.34491	1.21461
3.33829	1.22991
3.33758	1.22501
3.33946	1.23026
3.35757	1.23209
3.34963	1.22606
3.33881	1.22221
3.3309	1.21766
3.34204	1.22189
3.33072	1.21001
3.35145	1.21179
3.34125	1.21254
3.35495	1.21715
3.34462	1.20643
3.33522	1.21689
3.33307	1.21855
3.35248	1.20957
3.34787	1.21945
3.33781	1.2389
3.32911	1.23754
3.34583	1.22048
3.33041	1.2149
3.33238	1.21478
3.32049	1.2091
3.32029	1.21885
3.3261	1.20583
3.32099	1.19554
3.32062	1.20898
3.34843	1.22616
3.33683	1.23278
3.32976	1.23299
3.34152	1.21825
3.32309	1.22401
3.33928	1.22002
3.33481	1.20393
3.32036	1.21593
3.33389	1.21608
3.33319	1.22716
3.34411	1.22591
3.34177	1.219
3.35234	1.22046
3.33317	1.2192
3.35238	1.22144
3.34936	1.21486
3.3391	1.22583
3.35034	1.23181
3.32579	1.23558
3.34798	1.22618
3.33303	1.22565
3.3282	1.21668
3.33475	1.22402
3.33466	1.22115
3.33457	1.22099
3.3314	1.21672
3.33617	1.22565
3.33294	1.23524
3.32492	1.2433
3.30793	1.24105
3.31925	1.24738
3.32278	1.22501
3.31426	1.21171
3.33045	1.22218
3.32677	1.20856
3.33037	1.21357
3.33155	1.21493
3.31526	1.21856
3.32048	1.20614
3.33127	1.20652
3.34673	1.21641
3.33694	1.21805
3.33473	1.21249
3.33177	1.22256
3.34128	1.21818
3.33083	1.23317
3.34931	1.23951
3.33588	1.22026
3.35082	1.21773
3.34142	1.2152
3.34305	1.22375
3.34905	1.22937
3.34473	1.22684
3.33053	1.23969
3.32373	1.23172
3.34189	1.23227
3.33089	1.21455
3.3339	1.20768
3.33418	1.24118
3.33158	1.23485
3.33932	1.24567
3.34753	1.25446
3.35503	1.23793
3.34441	1.23766
3.32764	1.24033
3.3416	1.22009
3.35044	1.21599
3.34688	1.21954
3.34712	1.2227
3.33788	1.21135
3.34762	1.2351
3.37549	1.23238
3.35072	1.21239
3.33459	1.23055
3.38722	1.22396
3.34607	1.22071
3.34897	1.20599
3.35123	1.18341
3.34877	1.21445
3.32935	1.2237
3.3416	1.23731
3.35509	1.23126
3.33293	1.22862
3.35771	1.22411
3.36665	1.21488
3.35954	1.20366
3.34901	1.20644
3.33332	1.21082
3.36936	1.21822
3.3757	1.21346
3.35988	1.19951
3.34554	1.20421
3.35916	1.21102
3.32995	1.21745
3.36504	1.21597
3.36417	1.21698
3.36393	1.22614
3.36886	1.22373
3.35091	1.21258
3.36198	1.19694
3.35543	1.2082
3.33912	1.20309
3.3583	1.21906
3.35033	1.22118
3.33999	1.20855
3.34936	1.2278
3.33969	1.2189
3.36401	1.21051
3.36522	1.21007
3.3709	1.20819
3.36333	1.21263
3.36172	1.21882
3.35259	1.23246
3.34362	1.23008
3.35876	1.2147
3.3522	1.21295
3.37656	1.2058
3.35651	1.20055
3.36831	1.21822
3.35611	1.22479
3.3811	1.22341
3.34538	1.2282
3.36608	1.22755
3.37992	1.23491
3.35995	1.21866
3.36297	1.22637
3.34812	1.21407
3.35507	1.20835
3.36312	1.20647
3.37552	1.21962
3.37012	1.20446
3.34649	1.19885
3.32679	1.20594
3.32419	1.21392
3.32329	1.21682
3.33686	1.22194
3.31791	1.22195
3.33443	1.22142
3.3545	1.23352
3.34212	1.24256
3.31965	1.2283
3.29499	1.24079
3.32503	1.23442
3.317	1.23391
3.29863	1.22256
3.3159	1.23365
3.33353	1.20138
3.31913	1.19874
3.35042	1.20476
3.33471	1.23722
3.36583	1.22568
3.35988	1.23024
3.35466	1.23584
3.33706	1.23318
3.31206	1.22289
3.31349	1.22991
3.32687	1.24627
3.33313	1.22768
3.34845	1.22975
3.34655	1.2297
3.3597	1.22212
3.35824	1.21714
3.36443	1.24299
3.37233	1.24216
3.35702	1.2369
3.34655	1.23438
3.3494	1.23386
3.37909	1.23076
3.35996	1.20211
3.34061	1.19499
3.35988	1.20061
3.34161	1.2054
3.33255	1.22051
3.35304	1.20284
3.35676	1.20295
3.34326	1.23416
3.34913	1.23949
3.32998	1.23084
3.33657	1.22704
3.33691	1.20553
3.315	1.20997
3.37165	1.23229
3.33164	1.23207
3.31185	1.22774
3.35181	1.22915
3.33606	1.23991
3.33734	1.26549
3.36045	1.23918
3.33398	1.24473
3.35086	1.23658
3.3705	1.2193
3.3252	1.23482
3.33745	1.22057
3.35533	1.22471
3.34924	1.21211
3.32994	1.22311
3.33269	1.23521
3.33443	1.23204
3.30198	1.23807
3.31442	1.24239
3.35992	1.24662
3.32619	1.24338
3.32505	1.23026
3.35387	1.22051
3.34256	1.2177
3.34739	1.22154
3.32095	1.22176
3.3397	1.19689
3.32327	1.21377
3.32131	1.23032
3.34969	1.21697
3.3411	1.21403
3.34511	1.2158
3.32363	1.24296
3.35739	1.2471
3.38023	1.23842
3.35308	1.25398
3.35738	1.2422
3.3496	1.24702
3.32085	1.24909
3.33434	1.23574
3.36242	1.218
3.34505	1.20835
3.35438	1.21957
3.354	1.22154
3.37457	1.22052
3.36979	1.21015
3.38091	1.21239
3.38479	1.22627
3.37006	1.23384
3.39413	1.22252
3.37759	1.22269
3.37557	1.24908
3.39061	1.23614
3.36615	1.24066
3.37353	1.24002
3.39834	1.2393
3.38256	1.21653
3.38816	1.21317
3.39332	1.24174
3.37153	1.24623
3.37402	1.22296
3.38456	1.23231
3.37371	1.24529
3.36338	1.24715
3.35621	1.23478
3.37245	1.21543
3.377	1.23579
3.36397	1.21833
3.37779	1.21908
3.37751	1.2204
3.33818	1.23748
3.3725	1.25577
3.35346	1.24084
3.36034	1.23607
3.38562	1.22917
3.39149	1.22542
3.39042	1.24602
3.40616	1.23739
3.40547	1.23145
3.40299	1.24007
3.42386	1.23428
3.39401	1.25563
3.38529	1.23685
3.36889	1.2593
3.37391	1.23957
3.39767	1.21879
3.34354	1.23962
3.38143	1.22308
3.38509	1.23705
3.37583	1.22232
3.41309	1.22566
3.41555	1.22382
3.41938	1.21655
3.37847	1.22496
3.36998	1.24771
3.36593	1.2399
3.36675	1.24609
3.361	1.24308
3.3996	1.25262
3.33312	1.26278
3.34895	1.24072
3.33348	1.24989
3.35791	1.26444
3.3468	1.23803
3.32793	1.25215
3.34542	1.24499
3.35294	1.26118
3.35236	1.24643
3.37983	1.25652
3.34234	1.25291
3.3568	1.23656
3.29313	1.21212
3.33456	1.2338
3.3527	1.23335
3.33423	1.23015
3.333	1.24039
3.32064	1.24086
3.34777	1.25998
3.37315	1.23652
3.34221	1.21085
3.35021	1.21887
3.36096	1.23362
3.37469	1.2582
3.37442	1.24759
3.37979	1.2524
3.35103	1.28562
3.34208	1.2638
3.36586	1.22521
3.342	1.25349
3.34512	1.26308
3.32921	1.26264
3.35483	1.22556
3.38515	1.23152
3.42278	1.23713
3.40415	1.20521
3.37165	1.21736
3.37277	1.19621
3.34981	1.20045
3.35732	1.22383
3.37824	1.24603
3.35908	1.22452
3.38031	1.22088
3.39054	1.2399
3.38335	1.25173
3.35082	1.26325
3.33352	1.24079
3.34472	1.25405
3.32905	1.25774
3.30976	1.25499
3.35175	1.26631
3.35419	1.2522
3.34653	1.24954
3.36078	1.22178
3.31929	1.2389
3.37038	1.25929
3.34783	1.25692
3.33263	1.22317
3.36357	1.24153
3.37362	1.22524
3.43839	1.24103
3.41175	1.21442
3.38667	1.22461
3.38134	1.22569
3.33761	1.19482
3.39767	1.21693
3.3604	1.21786
3.35002	1.23869
3.32865	1.2628
3.32497	1.22089
3.32722	1.23623
3.34819	1.215
3.34359	1.21828
3.35563	1.23124
3.34406	1.23758
3.35687	1.24828
3.37855	1.26098
3.37992	1.25496
3.39896	1.26443
3.40133	1.24763
3.37746	1.23535
3.38083	1.23074
3.33133	1.24227
3.37535	1.22465
3.40379	1.22434
3.3772	1.23177
3.38846	1.24348
3.37988	1.23165
3.36104	1.23775
3.36041	1.21839
3.33272	1.22055
3.34043	1.25513
3.37538	1.23261
3.35658	1.2445
3.34938	1.21988
3.3725	1.21524
3.36871	1.23405
3.37776	1.2244
3.33095	1.22657
3.37045	1.21934
3.39531	1.21018
3.37111	1.22393
3.36182	1.23585
3.37267	1.25386
3.35201	1.24342
3.34827	1.25513
3.3223	1.23351
3.35998	1.22415
3.35283	1.23787
3.36503	1.22248
3.37356	1.23282
3.39338	1.23013
3.38941	1.26012
3.37848	1.27772
3.37889	1.2545
3.39257	1.23415
3.40559	1.22807
3.43111	1.20825
3.404	1.24266
3.3992	1.24301
3.42065	1.23117
3.36687	1.24887
3.4132	1.23655
3.40467	1.22268
3.39464	1.20688
3.43786	1.23073
3.38734	1.22098
3.40933	1.22486
3.40998	1.23065
3.40462	1.23337
3.40491	1.21443
3.4114	1.19989
3.38238	1.20456
3.38934	1.18991
3.40695	1.20216
3.36415	1.20953
3.35136	1.23955
3.39115	1.24487
3.3967	1.23229
3.40699	1.24164
3.40754	1.23316
3.4084	1.20865
[truncated: 2,278 more rows]
