# Supplementary material for: Myosin with hypertrophic cardiac mutation R712L has a decreased working stroke which is rescued by omecamtiv mecarbil
Source: eLife journal article supplement (doi:10.7554/elife.63691), 2021-02-19
Supplement: fig3-data1 [file Fig3C Source Data.xlsx]

## Sheet: WT - 1uM ATP
	WT, 1 µM ATP Data
0.020108	0
0.020108	0.0019802
0.020124	0.0039604
0.02018	0.00594059
0.020208	0.00792079
0.020212	0.00990099
0.020248	0.0118812
0.020328	0.0138614
0.020492	0.0158416
0.020564	0.0178218
0.020584	0.019802
0.02064	0.0217822
0.020656	0.0237624
0.020972	0.0257426
0.02108	0.0277228
0.021132	0.029703
0.02114	0.0316832
0.021156	0.0336634
0.021284	0.0356436
0.021296	0.0376238
0.021332	0.039604
0.021384	0.0415842
0.021644	0.0435644
0.021648	0.0455446
0.021952	0.0475248
0.021968	0.049505
0.022032	0.0514851
0.022156	0.0534653
0.022188	0.0554455
0.022236	0.0574257
0.022304	0.0594059
0.02258	0.0613861
0.022584	0.0633663
0.0226	0.0653465
0.022624	0.0673267
0.023	0.0693069
0.023036	0.0712871
0.023172	0.0732673
0.023388	0.0752475
0.023708	0.0772277
0.023816	0.0792079
0.024096	0.0811881
0.024384	0.0831683
0.024648	0.0851485
0.024804	0.0871287
0.024956	0.0891089
0.025068	0.0910891
0.025236	0.0930693
0.0258	0.0950495
0.025964	0.0970297
0.026096	0.0990099
0.026164	0.10099
0.02628	0.10297
0.02754	0.10495
0.027936	0.106931
0.02804	0.108911
0.02814	0.110891
0.028384	0.112871
0.028584	0.114851
0.028784	0.116832
0.028812	0.118812
0.029288	0.120792
0.029308	0.122772
0.029584	0.124752
0.029932	0.126733
0.029988	0.130693
0.030228	0.132673
0.030332	0.134653
0.030336	0.136634
0.03066	0.138614
0.030964	0.140594
0.0314	0.142574
0.031468	0.144554
0.031844	0.146535
0.032152	0.148515
0.032468	0.150495
0.032508	0.152475
0.032624	0.154455
0.032728	0.156436
0.033428	0.158416
0.03362	0.160396
0.034064	0.162376
0.03414	0.164356
0.034232	0.166337
0.034292	0.168317
0.034308	0.170297
0.035132	0.172277
0.0354	0.174257
0.036152	0.176238
0.036204	0.178218
0.037864	0.180198
0.037932	0.182178
0.03872	0.184158
0.038844	0.186139
0.039108	0.188119
0.039168	0.190099
0.039804	0.192079
0.039812	0.194059
0.039844	0.19604
0.0411	0.19802
0.041184	0.2
0.041328	0.20198
0.04156	0.20396
0.042032	0.205941
0.042476	0.207921
0.043044	0.209901
0.043276	0.211881
0.043492	0.213861
0.043508	0.215842
0.043716	0.217822
0.043816	0.219802
0.044268	0.221782
0.044636	0.223762
0.045764	0.225743
0.045832	0.227723
0.046172	0.229703
0.046352	0.231683
0.046656	0.233663
0.046868	0.235644
0.047896	0.237624
0.048196	0.239604
0.048296	0.241584
0.04832	0.243564
0.04888	0.245545
0.049144	0.247525
0.049928	0.249505
0.050452	0.251485
0.050856	0.253465
0.0511	0.255446
0.0514	0.257426
0.051688	0.259406
0.051944	0.261386
0.052032	0.263366
0.052704	0.265347
0.052892	0.267327
0.053232	0.269307
0.053248	0.271287
0.053824	0.273267
0.05424	0.275248
0.05474	0.277228
0.055612	0.279208
0.055628	0.281188
0.056816	0.283168
0.057196	0.285149
0.057792	0.287129
0.058728	0.289109
0.058944	0.291089
0.059052	0.293069
0.059184	0.29505
0.059416	0.29703
0.059664	0.29901
0.060836	0.30099
0.06092	0.30297
0.061616	0.30495
0.062456	0.306931
0.063016	0.308911
0.063756	0.310891
0.064456	0.312871
0.064616	0.314851
0.065088	0.316832
0.067304	0.318812
0.067452	0.320792
0.067652	0.322772
0.067676	0.324752
0.06808	0.326733
0.068552	0.328713
0.068636	0.330693
0.069048	0.332673
0.069148	0.334653
0.069252	0.336634
0.069688	0.338614
0.07004	0.340594
0.070096	0.342574
0.0704	0.344554
0.0734	0.346535
0.073436	0.348515
0.074864	0.350495
0.076716	0.352475
0.077308	0.354455
0.078324	0.356436
0.078548	0.358416
0.079212	0.360396
0.079272	0.362376
0.079772	0.364356
0.079776	0.366337
0.08142	0.368317
0.081692	0.370297
0.082268	0.372277
0.082544	0.374257
0.083084	0.376238
0.083464	0.378218
0.086756	0.380198
0.087516	0.382178
0.088604	0.384158
0.088612	0.386139
0.089436	0.388119
0.089924	0.390099
0.089956	0.392079
0.0905	0.394059
0.09052	0.39604
0.090728	0.39802
0.091444	0.4
0.09214	0.40198
0.09222	0.40396
0.093208	0.405941
0.093332	0.407921
0.09374	0.409901
0.093764	0.411881
0.093808	0.415842
0.093908	0.417822
0.094108	0.419802
0.095552	0.421782
0.095676	0.423762
0.096916	0.425743
0.097088	0.427723
0.097184	0.429703
0.0973	0.431683
0.097648	0.433663
0.09786	0.435644
0.097916	0.437624
0.098528	0.439604
0.098784	0.441584
0.100484	0.443564
0.1015	0.445545
0.10186	0.447525
0.103132	0.449505
0.103172	0.451485
0.103588	0.453465
0.10376	0.455446
0.103776	0.457426
0.105216	0.459406
0.105704	0.461386
0.105732	0.463366
0.105984	0.465347
0.107204	0.467327
0.107948	0.469307
0.108648	0.471287
0.109152	0.473267
0.109356	0.475248
0.109532	0.477228
0.111904	0.479208
0.113804	0.481188
0.113984	0.483168
0.115648	0.485149
0.11614	0.487129
0.1172	0.489109
0.117476	0.491089
0.118696	0.493069
0.119624	0.49505
0.120144	0.49703
0.120852	0.49901
0.121192	0.50099
0.122648	0.50297
0.123692	0.50495
0.124252	0.506931
0.124268	0.508911
0.124972	0.510891
0.125308	0.512871
0.1254	0.514851
0.125828	0.516832
0.12588	0.518812
0.126404	0.520792
0.126812	0.522772
0.12688	0.524752
0.127272	0.526733
0.127424	0.528713
0.1282	0.530693
0.129688	0.532673
0.131236	0.534653
0.132024	0.536634
0.13264	0.538614
0.13276	0.540594
0.133016	0.542574
0.133416	0.544554
0.133732	0.546535
0.133992	0.548515
0.134292	0.550495
0.134896	0.552475
0.135324	0.554455
0.135448	0.556436
0.135636	0.558416
0.135816	0.560396
0.136672	0.562376
0.13694	0.564356
0.137316	0.566337
0.138428	0.568317
0.13882	0.570297
0.1391	0.572277
0.142828	0.574257
0.143528	0.576238
0.143684	0.578218
0.144372	0.580198
0.145876	0.582178
0.146328	0.584158
0.147076	0.586139
0.148084	0.588119
0.148312	0.590099
0.148316	0.592079
0.148952	0.594059
0.15084	0.59604
0.151072	0.59802
0.151828	0.6
0.153852	0.60198
0.155172	0.60396
0.155624	0.605941
0.15726	0.607921
0.157584	0.609901
0.158232	0.611881
0.158304	0.613861
0.159784	0.615842
0.160604	0.617822
0.162176	0.619802
0.163092	0.621782
0.166428	0.623762
0.166452	0.625743
0.166516	0.627723
0.166732	0.629703
0.166792	0.631683
0.167528	0.633663
0.168824	0.635644
0.16892	0.637624
0.170268	0.639604
0.170808	0.641584
0.171388	0.643564
0.17184	0.645545
0.173432	0.647525
0.174968	0.649505
0.17516	0.651485
0.175452	0.653465
0.177752	0.655446
0.177828	0.657426
0.17846	0.659406
0.179344	0.661386
0.17964	0.663366
0.18064	0.665347
0.181324	0.667327
0.18202	0.669307
0.182704	0.671287
0.183344	0.673267
0.1848	0.675248
0.186516	0.677228
0.18794	0.679208
0.189044	0.681188
0.189688	0.683168
0.190684	0.685149
0.190704	0.687129
0.191288	0.689109
0.191408	0.691089
0.191908	0.693069
0.192336	0.69505
0.194556	0.69703
0.196728	0.69901
0.19686	0.70099
0.198508	0.70297
0.200544	0.70495
0.201444	0.706931
0.201516	0.708911
0.202136	0.710891
0.20364	0.712871
0.204648	0.714851
0.204868	0.716832
0.205368	0.718812
0.205704	0.720792
0.20574	0.722772
0.206028	0.724752
0.206216	0.726733
0.207384	0.728713
0.20766	0.730693
0.209812	0.732673
0.214232	0.734653
0.214468	0.736634
0.21492	0.738614
0.216976	0.740594
0.218124	0.742574
0.21854	0.744554
0.220116	0.746535
0.220864	0.748515
0.2249	0.750495
0.22556	0.752475
0.229868	0.754455
0.231648	0.756436
0.232868	0.758416
0.234132	0.760396
0.234516	0.762376
0.235492	0.764356
0.2364	0.766337
0.236424	0.768317
0.236704	0.770297
0.2374	0.772277
0.237704	0.774257
0.2379	0.776238
0.24092	0.778218
0.241312	0.780198
0.24274	0.782178
0.24334	0.784158
0.245448	0.786139
0.24548	0.788119
0.248284	0.790099
0.248316	0.792079
0.249492	0.794059
0.250392	0.79604
0.253072	0.79802
0.253248	0.8
0.255724	0.80198
0.255976	0.80396
0.256508	0.805941
0.257704	0.807921
0.259824	0.809901
0.260556	0.811881
0.260768	0.813861
0.261168	0.815842
0.261632	0.817822
0.262256	0.819802
0.266564	0.821782
0.269956	0.823762
0.271988	0.825743
0.274348	0.827723
0.274988	0.829703
0.27602	0.831683
0.278524	0.833663
0.280972	0.835644
0.283916	0.837624
0.284068	0.839604
0.28668	0.841584
0.28924	0.843564
0.28952	0.845545
0.290428	0.847525
0.29304	0.849505
0.295676	0.851485
0.296036	0.853465
0.302012	0.855446
0.306336	0.857426
0.306608	0.859406
0.31238	0.861386
0.321684	0.863366
0.322076	0.865347
0.32328	0.867327
0.331424	0.869307
0.332176	0.871287
0.340764	0.873267
0.341416	0.875248
0.344052	0.877228
0.346804	0.879208
0.348512	0.881188
0.35066	0.883168
0.357668	0.885149
0.362104	0.887129
0.365972	0.889109
0.366908	0.891089
0.3677	0.893069
0.368156	0.89505
0.370796	0.89703
0.3709	0.89901
0.380388	0.90099
0.383956	0.90297
0.385732	0.90495
0.388272	0.906931
0.389472	0.908911
0.396004	0.910891
0.400316	0.912871
0.42228	0.914851
0.422896	0.916832
0.428832	0.918812
0.437556	0.920792
0.438612	0.922772
0.439316	0.924752
0.440816	0.926733
0.441032	0.928713
0.443992	0.930693
0.449184	0.932673
0.449972	0.934653
0.454344	0.936634
0.460292	0.938614
0.46372	0.940594
0.467728	0.942574
0.471108	0.944554
0.474384	0.946535
0.484688	0.948515
0.489244	0.950495
0.49068	0.952475
0.495228	0.954455
0.498124	0.956436
0.514824	0.958416
0.52122	0.960396
0.525152	0.962376
0.5263	0.964356
0.528708	0.966337
0.536592	0.968317
0.547692	0.970297
0.585404	0.972277
0.588108	0.974257
0.601064	0.976238
0.607792	0.978218
0.609328	0.980198
0.6129	0.982178
0.617136	0.984158
0.637548	0.986139
0.672552	0.988119
0.696272	0.990099
0.710548	0.992079
0.733144	0.994059
0.755024	0.99604
0.82596	0.99802
0.83934	1

## Sheet: WT - 1000uM ATP
	WT, 1000 µM ATP Data
0.02004	0
0.02004	0.00118343
0.020064	0.00236686
0.0201	0.00473373
0.02022	0.00591716
0.020276	0.00710059
0.020344	0.00828402
0.020428	0.00946746
0.020452	0.0106509
0.020484	0.0130178
0.020488	0.0142012
0.020496	0.0153846
0.0205	0.016568
0.020504	0.0177515
0.020552	0.0189349
0.02058	0.0201183
0.020588	0.0213018
0.0206	0.0224852
0.020616	0.0236686
0.020636	0.0248521
0.020696	0.0260355
0.02072	0.0272189
0.020744	0.0284024
0.020756	0.0295858
0.020784	0.0307692
0.020788	0.0319527
0.020836	0.0331361
0.020864	0.0343195
0.020872	0.035503
0.020888	0.0366864
0.020908	0.0378698
0.020912	0.0390533
0.020928	0.0414201
0.020956	0.0426036
0.020976	0.043787
0.020984	0.0449704
0.020992	0.0461538
0.021048	0.0473373
0.021052	0.0485207
0.02106	0.0497041
0.021096	0.0508876
0.021152	0.052071
0.02118	0.0532544
0.021192	0.0544379
0.021204	0.0556213
0.021228	0.0568047
0.021268	0.0579882
0.02128	0.0591716
0.021288	0.060355
0.021292	0.0615385
0.021296	0.0627219
0.021312	0.0639053
0.02136	0.0650888
0.021384	0.0662722
0.021396	0.0674556
0.021412	0.0686391
0.021416	0.0710059
0.021424	0.0721893
0.021444	0.0733728
0.021484	0.0757396
0.02156	0.0769231
0.021568	0.0781065
0.021588	0.0792899
0.021656	0.0804734
0.02168	0.0816568
0.021772	0.0828402
0.021796	0.0840237
0.02186	0.0852071
0.021888	0.087574
0.021912	0.0887574
0.021916	0.0899408
0.021956	0.0911243
0.022016	0.0923077
0.02208	0.0934911
0.022088	0.0946746
0.022164	0.095858
0.022232	0.0970414
0.022236	0.0982249
0.022252	0.0994083
0.022288	0.100592
0.022292	0.101775
0.022444	0.102959
0.022464	0.104142
0.022476	0.105325
0.022492	0.106509
0.02252	0.107692
0.022544	0.108876
0.022656	0.110059
0.02266	0.111243
0.022708	0.112426
0.022736	0.113609
0.022808	0.114793
0.022828	0.115976
0.022892	0.11716
0.0229	0.118343
0.022916	0.119527
0.022992	0.12071
0.023	0.123077
0.023004	0.12426
0.023024	0.125444
0.023032	0.126627
0.023052	0.127811
0.023104	0.128994
0.023108	0.130178
0.023232	0.131361
0.023248	0.132544
0.023256	0.133728
0.023348	0.134911
0.023384	0.136095
0.023404	0.138462
0.023416	0.139645
0.02342	0.140828
0.02346	0.142012
0.023504	0.143195
0.023512	0.144379
0.023544	0.145562
0.023576	0.146746
0.023584	0.147929
0.0236	0.149112
0.023628	0.150296
0.023632	0.151479
0.023672	0.152663
0.023676	0.15503
0.023696	0.156213
0.0237	0.157396
0.023716	0.15858
0.023724	0.159763
0.02376	0.160947
0.023812	0.16213
0.023836	0.163314
0.023876	0.164497
0.023916	0.16568
0.023972	0.166864
0.024008	0.168047
0.02404	0.169231
0.02412	0.170414
0.024136	0.171598
0.024168	0.172781
0.024176	0.173964
0.024196	0.175148
0.024208	0.176331
0.024212	0.177515
0.024224	0.178698
0.024228	0.179882
0.024236	0.181065
0.024256	0.182249
0.024368	0.183432
0.024392	0.184615
0.024396	0.185799
0.02444	0.186982
0.024452	0.188166
0.024464	0.189349
0.024504	0.191716
0.024512	0.192899
0.02452	0.194083
0.02462	0.195266
0.024636	0.19645
0.024692	0.197633
0.024724	0.198817
0.024736	0.2
0.024748	0.201183
0.024788	0.202367
0.024792	0.20355
0.024832	0.204734
0.024844	0.205917
0.024936	0.207101
0.02502	0.208284
0.0251	0.209467
0.025176	0.210651
0.025196	0.211834
0.025208	0.213018
0.025232	0.214201
0.025264	0.215385
0.025268	0.216568
0.025324	0.217751
0.025332	0.218935
0.02536	0.220118
0.025368	0.221302
0.025384	0.222485
0.025424	0.223669
0.025428	0.224852
0.025468	0.226036
0.025496	0.227219
0.025536	0.228402
0.025564	0.229586
0.02566	0.230769
0.025716	0.231953
0.025752	0.233136
0.025772	0.23432
0.02578	0.235503
0.025792	0.236686
0.02584	0.23787
0.025844	0.239053
0.025856	0.240237
0.026104	0.24142
0.026184	0.242604
0.026196	0.243787
0.026208	0.246154
0.026212	0.247337
0.026252	0.248521
0.026316	0.249704
0.026376	0.250888
0.026428	0.253254
0.026512	0.254438
0.026528	0.255621
0.026532	0.256805
0.026616	0.257988
0.026644	0.259172
0.02666	0.261538
0.02668	0.262722
0.026804	0.263905
0.026824	0.265089
0.026844	0.266272
0.026868	0.269822
0.0269	0.271006
0.026904	0.272189
0.027	0.273373
0.027036	0.274556
0.02718	0.27574
0.027204	0.276923
0.027216	0.278107
0.02726	0.27929
0.027284	0.280473
0.027292	0.281657
0.027324	0.28284
0.027352	0.285207
0.02736	0.286391
0.027364	0.287574
0.027376	0.288757
0.027448	0.289941
0.02748	0.291124
0.027484	0.292308
0.02752	0.293491
0.027592	0.294675
0.02764	0.295858
0.027652	0.297041
0.027664	0.298225
0.0277	0.299408
0.027704	0.301775
0.027788	0.302959
0.02794	0.304142
0.027972	0.305325
0.028032	0.306509
0.028048	0.307692
0.028052	0.308876
0.0281	0.310059
0.028116	0.312426
0.028144	0.313609
0.028268	0.315976
0.02828	0.31716
0.02834	0.318343
0.028344	0.319527
0.028352	0.32071
0.028364	0.321893
0.028428	0.323077
0.028444	0.32426
0.028468	0.325444
0.028508	0.326627
0.028528	0.327811
0.02854	0.328994
0.028568	0.331361
0.02858	0.332544
0.028592	0.333728
0.028648	0.336095
0.028656	0.337278
0.028664	0.338462
0.028668	0.339645
0.028676	0.340828
0.028692	0.342012
0.028788	0.343195
0.028824	0.344379
0.028884	0.345562
0.028896	0.346746
0.028968	0.347929
0.028988	0.349112
0.029024	0.350296
0.029048	0.351479
0.029052	0.352663
0.029084	0.353846
0.02914	0.356213
0.029148	0.357396
0.029236	0.35858
0.029284	0.359763
0.029336	0.360947
0.029348	0.36213
0.029352	0.363314
0.029472	0.364497
0.029496	0.36568
0.029528	0.366864
0.029548	0.368047
0.02958	0.369231
0.029604	0.370414
0.029656	0.371598
0.029676	0.372781
0.029684	0.373964
0.029724	0.375148
0.029792	0.376331
0.029796	0.377515
0.029932	0.378698
0.030004	0.379882
0.03002	0.381065
0.030128	0.382249
0.03014	0.383432
0.030144	0.384615
0.030152	0.385799
0.030192	0.386982
0.030208	0.388166
0.03022	0.389349
0.03024	0.390533
0.030248	0.391716
0.030408	0.392899
0.030452	0.394083
0.030464	0.395266
0.030476	0.39645
0.03048	0.397633
0.030488	0.398817
0.0305	0.4
0.030524	0.401183
0.030564	0.402367
0.030612	0.40355
0.030676	0.404734
0.030748	0.405917
0.030772	0.407101
0.030872	0.408284
0.030988	0.409467
0.030996	0.411834
0.03102	0.413018
0.031024	0.414201
0.031052	0.415385
0.0311	0.416568
0.031172	0.417751
0.0312	0.418935
0.03122	0.420118
0.031284	0.421302
0.031296	0.422485
0.031352	0.423669
0.031504	0.424852
0.03158	0.427219
0.031648	0.428402
0.03166	0.429586
0.031676	0.430769
0.031688	0.431953
0.031696	0.435503
0.031752	0.436686
0.031768	0.43787
0.031772	0.439053
0.03182	0.440237
0.031944	0.44142
0.031964	0.442604
0.031996	0.443787
0.032012	0.44497
0.03204	0.446154
0.032128	0.447337
0.032148	0.448521
0.032156	0.449704
0.032328	0.450888
0.032344	0.452071
0.032364	0.453254
0.032472	0.454438
0.032492	0.455621
0.03252	0.456805
0.032524	0.457988
0.03258	0.459172
0.032688	0.460355
0.0327	0.461538
0.032724	0.462722
0.032744	0.463905
0.032752	0.465089
0.032824	0.466272
0.03284	0.467456
0.032888	0.468639
0.033216	0.469822
0.03322	0.471006
0.033256	0.472189
0.03326	0.474556
0.03332	0.47574
0.03334	0.476923
0.03336	0.478107
0.033532	0.47929
0.033572	0.480473
0.033584	0.481657
0.033588	0.48284
0.0336	0.484024
0.033656	0.485207
0.033804	0.486391
0.033928	0.487574
0.033964	0.488757
0.034016	0.489941
0.034068	0.491124
0.034104	0.492308
0.0342	0.493491
0.034352	0.494675
0.034396	0.495858
0.034412	0.497041
0.034468	0.498225
0.034544	0.499408
0.034588	0.500592
0.034628	0.501775
0.034668	0.502959
0.034704	0.504142
0.034712	0.505325
0.034764	0.506509
0.03482	0.507692
0.034856	0.508876
0.034976	0.510059
0.03504	0.511243
0.035044	0.512426
0.035056	0.513609
0.035116	0.514793
0.035128	0.515976
0.035152	0.51716
0.035192	0.518343
0.03522	0.519527
0.035224	0.52071
0.035256	0.521893
0.03526	0.523077
0.035288	0.525444
0.035356	0.526627
0.035392	0.527811
0.035424	0.528994
0.035428	0.530178
0.035496	0.531361
0.035544	0.532544
0.035548	0.533728
0.03556	0.534911
0.03558	0.536095
0.035592	0.537278
0.035624	0.538462
0.035636	0.539645
0.035724	0.540828
0.035776	0.542012
0.035788	0.543195
0.03594	0.544379
0.035944	0.545562
0.03598	0.546746
0.036028	0.547929
0.036064	0.549112
0.03614	0.550296
0.036232	0.551479
0.036332	0.552663
0.036336	0.553846
0.036372	0.55503
0.036508	0.556213
0.036556	0.557396
0.036572	0.55858
0.036636	0.559763
0.036652	0.560947
0.03666	0.56213
0.036748	0.563314
0.036884	0.564497
0.036892	0.56568
0.037	0.566864
0.03702	0.568047
0.037028	0.569231
0.03712	0.570414
0.03724	0.571598
0.037272	0.572781
0.037328	0.573964
0.03734	0.575148
0.037388	0.576331
0.037424	0.577515
0.037472	0.578698
0.037524	0.579882
0.037612	0.581065
0.037624	0.582249
0.037752	0.583432
0.037764	0.584615
0.037772	0.585799
0.037824	0.586982
0.03784	0.588166
0.037868	0.589349
0.037884	0.590533
0.038012	0.591716
0.038132	0.592899
0.03818	0.594083
0.038212	0.595266
0.038224	0.59645
0.0384	0.597633
0.038452	0.598817
0.038524	0.6
0.038628	0.601183
0.038636	0.602367
0.038648	0.60355
0.038692	0.604734
0.038768	0.605917
0.038796	0.607101
0.03886	0.608284
0.038916	0.609467
0.03894	0.610651
0.038944	0.611834
0.039064	0.613018
0.039068	0.614201
0.039316	0.615385
0.03932	0.616568
0.039432	0.617751
0.039468	0.618935
0.039504	0.620118
0.039656	0.621302
0.039708	0.622485
0.03978	0.623669
0.039784	0.624852
0.039788	0.626036
0.039812	0.627219
0.039824	0.628402
0.03988	0.629586
0.03992	0.630769
0.039956	0.631953
0.0401	0.633136
0.040232	0.63432
0.040352	0.635503
0.04036	0.636686
0.040368	0.63787
0.040456	0.639053
0.040536	0.640237
0.040584	0.64142
0.040848	0.642604
0.041024	0.643787
0.04106	0.64497
0.041112	0.646154
0.041156	0.647337
0.04122	0.648521
0.041236	0.649704
0.041396	0.652071
0.041456	0.653254
0.041516	0.654438
0.041596	0.655621
0.041616	0.656805
0.041688	0.657988
0.041748	0.659172
0.041752	0.660355
0.0419	0.661538
0.042064	0.662722
0.04222	0.663905
0.04252	0.665089
0.042588	0.666272
0.042712	0.667456
0.042772	0.668639
0.042896	0.669822
0.043028	0.671006
0.04304	0.672189
0.043064	0.674556
0.043096	0.67574
0.043124	0.676923
0.0432	0.678107
0.043268	0.67929
0.0433	0.680473
0.043396	0.681657
0.043416	0.68284
0.043624	0.684024
0.043704	0.685207
0.043784	0.686391
0.04382	0.687574
0.04384	0.688757
0.043992	0.689941
0.044064	0.691124
0.044152	0.692308
0.044408	0.693491
0.04448	0.694675
0.044492	0.695858
0.04452	0.697041
0.044552	0.698225
0.044616	0.699408
0.04474	0.700592
0.044816	0.701775
0.044944	0.702959
0.045092	0.704142
0.045104	0.705325
0.04516	0.706509
0.045268	0.707692
0.04538	0.708876
0.045428	0.710059
0.045508	0.711243
0.04554	0.712426
0.045572	0.713609
0.045636	0.714793
0.045736	0.715976
0.045812	0.71716
0.045868	0.718343
0.045976	0.719527
0.046	0.72071
0.046288	0.721893
0.046444	0.723077
0.046448	0.72426
0.0465	0.725444
0.04652	0.726627
0.046652	0.727811
0.046696	0.728994
0.046896	0.730178
0.046972	0.731361
0.04718	0.732544
0.047256	0.733728
0.04728	0.734911
0.04734	0.736095
0.047444	0.737278
0.047456	0.738462
0.047484	0.739645
0.047492	0.742012
0.047516	0.743195
0.047672	0.744379
0.047692	0.745562
0.047736	0.746746
0.0481	0.747929
0.048284	0.749112
0.048308	0.750296
0.048384	0.751479
0.048428	0.752663
0.0486	0.753846
0.04866	0.75503
0.048876	0.756213
0.049004	0.757396
0.049036	0.75858
0.049188	0.759763
0.049272	0.760947
0.049484	0.76213
0.04976	0.763314
0.049848	0.764497
0.049976	0.76568
0.050064	0.766864
0.05012	0.768047
0.0502	0.769231
0.050952	0.770414
0.05112	0.771598
0.051132	0.772781
0.051228	0.773964
0.051268	0.775148
0.051272	0.776331
0.051396	0.777515
0.051436	0.778698
0.051524	0.779882
0.05164	0.781065
0.051856	0.782249
0.052092	0.783432
0.052396	0.784615
0.05252	0.785799
0.052628	0.786982
0.052648	0.788166
0.052716	0.789349
0.052868	0.790533
0.052892	0.791716
0.0529	0.792899
0.053124	0.794083
0.053196	0.795266
0.053236	0.79645
0.053276	0.797633
0.053336	0.798817
0.053408	0.8
0.053452	0.801183
0.05352	0.802367
0.05366	0.80355
0.053672	0.804734
0.053852	0.805917
0.054124	0.807101
0.054208	0.808284
0.054256	0.809467
0.054416	0.810651
0.054636	0.811834
0.055004	0.813018
0.05534	0.814201
0.055452	0.815385
0.05552	0.816568
0.056168	0.817751
0.05636	0.818935
0.056536	0.820118
0.056656	0.821302
0.056828	0.822485
0.05714	0.823669
0.057204	0.824852
0.057444	0.826036
0.057464	0.827219
0.057632	0.828402
0.057668	0.829586
0.058116	0.830769
0.058456	0.833136
0.058684	0.83432
0.058812	0.835503
0.05894	0.836686
0.059064	0.83787
0.059072	0.839053
0.059716	0.840237
0.060156	0.84142
0.060284	0.842604
0.060316	0.843787
0.060476	0.84497
0.060712	0.846154
0.060788	0.847337
0.060976	0.848521
0.061228	0.849704
0.061252	0.850888
0.0614	0.852071
0.061652	0.853254
0.061784	0.854438
0.061832	0.855621
0.062	0.856805
0.062352	0.857988
0.062384	0.859172
0.06252	0.860355
0.06254	0.861538
0.062864	0.862722
0.063236	0.863905
0.063248	0.865089
0.063264	0.866272
0.0634	0.867456
0.063708	0.868639
0.06384	0.869822
0.063924	0.871006
0.063988	0.872189
0.06444	0.873373
0.064952	0.874556
0.065112	0.87574
0.06512	0.876923
0.065828	0.878107
0.066132	0.87929
0.066236	0.880473
0.066368	0.881657
0.06648	0.88284
0.066508	0.884024
0.066596	0.886391
0.066616	0.887574
0.066968	0.888757
0.067184	0.889941
0.067608	0.891124
0.068168	0.892308
0.068184	0.893491
0.068712	0.894675
0.068924	0.895858
0.070476	0.897041
0.070484	0.898225
0.071904	0.899408
0.07228	0.900592
0.073928	0.901775
0.074004	0.902959
0.074368	0.904142
0.074448	0.905325
0.074528	0.906509
0.074592	0.907692
0.074828	0.908876
0.07506	0.910059
0.075224	0.911243
0.076172	0.912426
0.076304	0.913609
0.076744	0.914793
0.077128	0.915976
0.077416	0.91716
0.077864	0.918343
0.078048	0.919527
0.07834	0.92071
0.078808	0.921893
0.078956	0.923077
0.079304	0.92426
0.07978	0.925444
0.080668	0.926627
0.083184	0.927811
0.083584	0.928994
0.084516	0.930178
0.085228	0.931361
0.086384	0.932544
0.086708	0.933728
0.08706	0.934911
0.087616	0.936095
0.089604	0.937278
0.090576	0.938462
0.09612	0.939645
0.097844	0.940828
0.098156	0.942012
0.099208	0.943195
0.09954	0.944379
0.102384	0.945562
0.102976	0.946746
0.103132	0.947929
0.104192	0.949112
0.106276	0.950296
0.106892	0.951479
0.110564	0.952663
0.111016	0.953846
0.113016	0.95503
0.113488	0.956213
0.115068	0.957396
0.1152	0.95858
0.117204	0.959763
0.119904	0.960947
0.121004	0.96213
0.122908	0.963314
0.123636	0.964497
0.12734	0.96568
0.134124	0.966864
0.136196	0.968047
0.141736	0.969231
0.14352	0.970414
0.143556	0.971598
0.14546	0.972781
0.14582	0.973964
0.147048	0.975148
0.147928	0.976331
0.159084	0.977515
0.17004	0.978698
0.172772	0.979882
0.181952	0.981065
0.18928	0.982249
0.195228	0.983432
0.210104	0.984615
0.231308	0.985799
0.259652	0.986982
0.271456	0.988166
0.286512	0.989349
0.29148	0.990533
0.310524	0.991716
0.336788	0.992899
0.33836	0.994083
0.407568	0.995266
0.428244	0.99645
0.44394	0.997633
0.544936	0.998817
0.575864	1
1	1
