# Supplementary material for: Myosin with hypertrophic cardiac mutation R712L has a decreased working stroke which is rescued by omecamtiv mecarbil
Source: eLife journal article supplement (doi:10.7554/elife.63691), 2021-02-19
Supplement: fig3-data1 [file Fig3D Source Data.xlsx]

## Sheet: R712L - 1uM ATP
	R712L 1 µM ATP Data	R712L 1000 µM ATP Data
0.020052	0
0.020052	0.00030248
0.02006	0.000604961
0.020128	0.000907441
0.020224	0.00120992
0.02036	0.0015124
0.020416	0.00181488
0.020548	0.00211736
0.02064	0.00241984
0.020696	0.00272232
0.020708	0.0030248
0.020716	0.00332728
0.020744	0.00362976
0.020832	0.00393224
0.02084	0.00423472
0.020892	0.00453721
0.020896	0.00483969
0.020904	0.00514217
0.02092	0.00544465
0.020924	0.00574713
0.020928	0.00604961
0.02096	0.00635209
0.020972	0.00665457
0.020984	0.00695705
0.021044	0.00725953
0.021056	0.00756201
0.02108	0.00786449
0.021096	0.00816697
0.021104	0.00846945
0.021124	0.00907441
0.021132	0.00937689
0.021176	0.00967937
0.02118	0.00998185
0.021192	0.0102843
0.021224	0.0105868
0.021244	0.0108893
0.021248	0.0111918
0.0213	0.0114943
0.021304	0.0117967
0.021316	0.0120992
0.02138	0.0124017
0.021388	0.0127042
0.021404	0.0130067
0.021424	0.0136116
0.021444	0.0139141
0.021448	0.0142166
0.021484	0.0145191
0.021504	0.0148215
0.02152	0.015124
0.021588	0.0154265
0.021664	0.015729
0.021692	0.0160315
0.021704	0.0163339
0.021708	0.0166364
0.021796	0.0169389
0.0218	0.0172414
0.021812	0.0175439
0.02182	0.0178463
0.021824	0.0181488
0.02184	0.0184513
0.021844	0.0187538
0.021848	0.0190563
0.021884	0.0193587
0.02192	0.0199637
0.021944	0.0202662
0.022052	0.0205687
0.022056	0.0208711
0.022112	0.0211736
0.02218	0.0214761
0.022248	0.0217786
0.02226	0.0220811
0.022312	0.0223835
0.022364	0.022686
0.022376	0.0229885
0.022396	0.023291
0.02242	0.0235935
0.022468	0.0238959
0.0225	0.0241984
0.022504	0.0245009
0.022528	0.0248034
0.022556	0.0251059
0.022592	0.0254083
0.022636	0.0257108
0.02264	0.0260133
0.0227	0.0263158
0.022768	0.0266183
0.022784	0.0269208
0.022816	0.0272232
0.022856	0.0275257
0.02286	0.0278282
0.022904	0.0281307
0.022916	0.0284332
0.022928	0.0287356
0.022952	0.0290381
0.022964	0.0293406
0.022968	0.0296431
0.022992	0.0299456
0.023056	0.030248
0.023068	0.0305505
0.023072	0.030853
0.02308	0.0311555
0.023092	0.0320629
0.023096	0.0323654
0.023124	0.0326679
0.023128	0.0329704
0.023156	0.0332728
0.023176	0.0335753
0.023232	0.0338778
0.023304	0.0341803
0.023396	0.0344828
0.023416	0.0347852
0.02342	0.0350877
0.023448	0.0356927
0.023544	0.0359952
0.0236	0.0362976
0.023648	0.0366001
0.023652	0.0369026
0.023672	0.0372051
0.023716	0.0375076
0.023752	0.03781
0.023772	0.0381125
0.023796	0.038415
0.023908	0.0387175
0.023924	0.0393224
0.023972	0.0396249
0.024004	0.0399274
0.024016	0.0402299
0.02404	0.0405324
0.024052	0.0408348
0.024072	0.0411373
0.024092	0.0414398
0.02422	0.0417423
0.024332	0.0420448
0.02436	0.0423472
0.02438	0.0426497
0.024432	0.0429522
0.024436	0.0432547
0.024444	0.0435572
0.024456	0.0438596
0.024508	0.0441621
0.024524	0.0444646
0.024548	0.0447671
0.024576	0.0450696
0.024736	0.0453721
0.024756	0.0456745
0.0248	0.045977
0.024816	0.0462795
0.024896	0.046582
0.024904	0.0468845
0.024916	0.0474894
0.025	0.0477919
0.025028	0.0480944
0.025044	0.0483969
0.025048	0.0486993
0.02506	0.0490018
0.025076	0.0493043
0.025132	0.0496068
0.025168	0.0499093
0.025184	0.0502117
0.025188	0.0505142
0.025196	0.0508167
0.025208	0.0511192
0.025216	0.0514217
0.025288	0.0517241
0.025296	0.0520266
0.025304	0.0523291
0.025308	0.0526316
0.025312	0.0529341
0.025316	0.0532365
0.025368	0.053539
0.025416	0.0538415
0.025432	0.054144
0.025452	0.0544465
0.02546	0.0547489
0.025464	0.0550514
0.025488	0.0553539
0.02554	0.0559589
0.025568	0.0562613
0.025636	0.0565638
0.025652	0.0568663
0.025736	0.0574713
0.025764	0.0577737
0.02578	0.0580762
0.025788	0.0583787
0.025828	0.0586812
0.025868	0.0589837
0.025876	0.0592861
0.025992	0.0595886
0.026012	0.0598911
0.026068	0.0601936
0.02608	0.0604961
0.026092	0.0607985
0.026112	0.061101
0.026116	0.0614035
0.026212	0.061706
0.02622	0.0620085
0.026224	0.0623109
0.026228	0.0626134
0.02624	0.0629159
0.026252	0.0632184
0.026256	0.0635209
0.026292	0.0638234
0.026312	0.0641258
0.026336	0.0644283
0.0264	0.0647308
0.026512	0.0650333
0.026572	0.0653358
0.0266	0.0656382
0.026628	0.0659407
0.026668	0.0662432
0.026684	0.0665457
0.026756	0.0668482
0.026828	0.0671506
0.026848	0.0674531
0.026856	0.0677556
0.026868	0.0680581
0.026888	0.0683606
0.027012	0.068663
0.027032	0.0689655
0.027076	0.069268
0.02714	0.0695705
0.027212	0.069873
0.027328	0.0701754
0.027376	0.0704779
0.02744	0.0707804
0.027464	0.0710829
0.027472	0.0713854
0.027504	0.0716878
0.027548	0.0719903
0.027588	0.0722928
0.027676	0.0725953
0.02772	0.0728978
0.027748	0.0732002
0.027804	0.0735027
0.027828	0.0738052
0.027848	0.0741077
0.028008	0.0744102
0.028024	0.0747126
0.028032	0.0750151
0.028128	0.0753176
0.0282	0.0756201
0.028212	0.0759226
0.028224	0.076225
0.028264	0.0765275
0.028376	0.07683
0.028508	0.0771325
0.028536	0.077435
0.028544	0.0777374
0.028548	0.0780399
0.028628	0.0783424
0.028648	0.0786449
0.028684	0.0789474
0.0287	0.0792498
0.02874	0.0795523
0.028748	0.0801573
0.028772	0.0804598
0.0288	0.0807623
0.02892	0.0810647
0.02896	0.0813672
0.02908	0.0816697
0.029128	0.0819722
0.02914	0.0822747
0.029152	0.0825771
0.029184	0.0828796
0.029196	0.0831821
0.0292	0.0834846
0.029336	0.0837871
0.029392	0.0840895
0.029432	0.084392
0.029484	0.0846945
0.0295	0.084997
0.029516	0.0852995
0.029536	0.0856019
0.029568	0.0859044
0.029584	0.0862069
0.029648	0.0865094
0.029732	0.0868119
0.029752	0.0871143
0.029756	0.0874168
0.0298	0.0877193
0.029852	0.0880218
0.029892	0.0883243
0.029896	0.0886267
0.02998	0.0889292
0.030012	0.0892317
0.030056	0.0895342
0.030068	0.0901391
0.030084	0.0904416
0.0301	0.0907441
0.030152	0.0910466
0.030156	0.0913491
0.030204	0.0916515
0.03026	0.0922565
0.030284	0.092559
0.03032	0.0928615
0.030324	0.0931639
0.03044	0.0934664
0.030508	0.0937689
0.0306	0.0940714
0.030608	0.0943739
0.03062	0.0946763
0.030624	0.0949788
0.030648	0.0952813
0.030676	0.0955838
0.0307	0.0961887
0.030704	0.0964912
0.030744	0.0967937
0.030884	0.0973987
0.030892	0.0977011
0.030928	0.0980036
0.030956	0.0983061
0.030964	0.0986086
0.031028	0.0989111
0.031084	0.099516
0.031092	0.0998185
0.031208	0.100121
0.03124	0.100423
0.0313	0.100726
0.031328	0.101028
0.03134	0.101331
0.031352	0.101633
0.031544	0.101936
0.031656	0.102238
0.031832	0.102541
0.031848	0.102843
0.03188	0.103146
0.031948	0.103448
0.031976	0.103751
0.032024	0.104053
0.032052	0.104356
0.032056	0.104658
0.032108	0.104961
0.03212	0.105263
0.032144	0.105566
0.032376	0.105868
0.03258	0.106171
0.032584	0.106473
0.032652	0.106776
0.032676	0.107078
0.032684	0.107381
0.032868	0.107683
0.032908	0.108288
0.032912	0.10859
0.032916	0.108893
0.032928	0.109195
0.032936	0.109498
0.032992	0.1098
0.03302	0.110103
0.033212	0.110405
0.033276	0.110708
0.033352	0.11101
0.03348	0.111313
0.03352	0.111615
0.033528	0.111918
0.033556	0.11222
0.033596	0.112523
0.033716	0.112825
0.033724	0.113128
0.033744	0.113733
0.033764	0.114035
0.033788	0.114338
0.03384	0.11464
0.033908	0.114943
0.033928	0.115245
0.033932	0.115547
0.03394	0.11585
0.034016	0.116152
0.03402	0.116455
0.034112	0.116757
0.034232	0.11706
0.034288	0.117362
0.0343	0.117665
0.03434	0.117967
0.034368	0.11827
0.034372	0.118572
0.034432	0.118875
0.034484	0.119177
0.034624	0.11948
0.034696	0.119782
0.034736	0.120085
0.034752	0.120387
0.03476	0.12069
0.034764	0.120992
0.034776	0.121295
0.034888	0.121597
0.035008	0.1219
0.03504	0.122202
0.035048	0.122505
0.03512	0.122807
0.035132	0.123109
0.035212	0.123412
0.035236	0.123714
0.035304	0.124017
0.035396	0.124319
0.03548	0.124622
0.035544	0.124924
0.035568	0.125227
0.03562	0.125529
0.035724	0.125832
0.035728	0.126134
0.035816	0.126437
0.035872	0.126739
0.035952	0.127042
0.035992	0.127344
0.036092	0.127647
0.036112	0.127949
0.036116	0.128252
0.036128	0.128554
0.036132	0.128857
0.036152	0.129159
0.036176	0.129462
0.036268	0.129764
0.03632	0.130067
0.036332	0.130672
0.03636	0.130974
0.036404	0.131276
0.036464	0.131579
0.03664	0.131881
0.036652	0.132184
0.036656	0.132486
0.036664	0.132789
0.036688	0.133091
0.036716	0.133394
0.036744	0.133999
0.03676	0.134301
0.036764	0.134604
0.036784	0.134906
0.03698	0.135209
0.037048	0.135511
0.037144	0.135814
0.037212	0.136116
0.037256	0.136419
0.037324	0.136721
0.037388	0.137024
0.037404	0.137629
0.037544	0.137931
0.037628	0.138234
0.037664	0.138536
0.037724	0.138838
0.037728	0.139443
0.037824	0.139746
0.037828	0.140048
0.03796	0.140351
0.038012	0.140653
0.038016	0.140956
0.03804	0.141258
0.03808	0.141561
0.038096	0.141863
0.0381	0.142166
0.038192	0.142468
0.038204	0.142771
0.038244	0.143073
0.03834	0.143376
0.038356	0.143678
0.038376	0.143981
0.038428	0.144283
0.038504	0.144586
0.038524	0.144888
0.038552	0.145191
0.038564	0.145493
0.038688	0.145796
0.038704	0.146098
0.038708	0.1464
0.038728	0.146703
0.03878	0.147005
0.038792	0.147308
0.038816	0.14761
0.038836	0.148215
0.03884	0.148518
0.038884	0.14882
0.038956	0.149123
0.038984	0.149425
0.03908	0.149728
0.039084	0.15003
0.0391	0.150333
0.039276	0.150635
0.03928	0.150938
0.039368	0.15124
0.039372	0.151543
0.039464	0.151845
0.0395	0.152148
0.039548	0.152753
0.039556	0.153055
0.03964	0.153358
0.039652	0.15366
0.03968	0.153962
0.039696	0.154265
0.039708	0.154567
0.039756	0.15487
0.039788	0.155172
0.03982	0.155475
0.03988	0.155777
0.039916	0.15608
0.03996	0.156382
0.040092	0.156685
0.040236	0.156987
0.040368	0.15729
0.04038	0.157592
0.040404	0.157895
0.040464	0.158197
0.040484	0.158802
0.040488	0.159105
0.040496	0.159407
0.040652	0.15971
0.040692	0.160012
0.0407	0.160315
0.040716	0.160617
0.040764	0.16092
0.040792	0.161222
0.040964	0.161525
0.041008	0.161827
0.041044	0.162432
0.041096	0.162734
0.041116	0.163037
0.041144	0.163339
0.04122	0.163642
0.041404	0.164247
0.041436	0.164549
0.041512	0.164852
0.04156	0.165154
0.041592	0.165457
0.041624	0.165759
0.041632	0.166062
0.04166	0.166364
0.04184	0.166667
0.041844	0.166969
0.04186	0.167272
0.041936	0.167574
0.041944	0.167877
0.041952	0.168179
0.042004	0.168482
0.042028	0.168784
0.042052	0.169087
0.042088	0.169389
0.042108	0.169691
0.042212	0.169994
0.042312	0.170296
0.042364	0.170599
0.042456	0.170901
0.042492	0.171204
0.042552	0.171506
0.042668	0.171809
0.042696	0.172111
0.042728	0.172414
0.042744	0.172716
0.04276	0.173019
0.042936	0.173321
0.043016	0.173624
0.043032	0.173926
0.043128	0.174229
0.043204	0.174531
0.043208	0.174834
0.043284	0.175136
0.04334	0.175439
0.043352	0.175741
0.043388	0.176044
0.0435	0.176346
0.0436	0.176649
0.043776	0.176951
0.043908	0.177253
0.043988	0.177556
0.043992	0.177858
0.044064	0.178161
0.044068	0.178463
0.044076	0.178766
0.044132	0.179068
0.044148	0.179371
0.044188	0.179673
0.044288	0.179976
0.04436	0.180278
0.044468	0.180581
0.044504	0.180883
0.044508	0.181186
0.044516	0.181488
0.044584	0.181791
0.044632	0.182093
0.044692	0.182396
0.044736	0.182698
0.044756	0.183001
0.044804	0.183303
0.04486	0.183606
0.04488	0.183908
0.0449	0.184211
0.044916	0.184513
0.044976	0.184815
0.045044	0.185118
0.045148	0.18542
0.045248	0.185723
0.045264	0.186025
0.045304	0.186328
0.045392	0.18663
0.045416	0.186933
0.045444	0.187235
0.045468	0.187538
0.04548	0.18784
0.045504	0.188143
0.045536	0.188445
0.045612	0.188748
0.045628	0.18905
0.045688	0.189353
0.045716	0.189655
0.045748	0.189958
0.045768	0.19026
0.045812	0.190563
0.045828	0.190865
0.045916	0.191168
0.046072	0.19147
0.046132	0.191773
0.04616	0.192075
0.046228	0.192377
0.046256	0.19268
0.046264	0.192982
0.046348	0.193285
0.046408	0.193587
0.046432	0.19389
0.046448	0.194192
0.04652	0.194495
0.046524	0.194797
0.046532	0.1951
0.046712	0.195402
0.046736	0.195705
0.046768	0.196007
0.046784	0.19631
0.046824	0.196612
0.046884	0.196915
0.0469	0.197217
0.04694	0.19752
0.047028	0.197822
0.047076	0.198125
0.047104	0.198427
0.047144	0.19873
0.047188	0.199032
0.04728	0.199335
0.047316	0.199637
0.047356	0.19994
0.047408	0.200242
0.047432	0.200544
0.047444	0.200847
0.047556	0.201149
0.047756	0.201452
0.047924	0.201754
0.048056	0.202057
0.048064	0.202359
0.048108	0.202662
0.048156	0.202964
0.048172	0.203267
0.048288	0.203569
0.048308	0.203872
0.048372	0.204174
0.048376	0.204477
0.048412	0.205082
0.04842	0.205384
0.048536	0.205687
0.048564	0.205989
0.04858	0.206292
0.048616	0.206594
0.048632	0.206897
0.048684	0.207199
0.048784	0.207502
0.048788	0.207804
0.048844	0.208106
0.049016	0.208409
0.049076	0.208711
0.049176	0.209014
0.049244	0.209316
0.049288	0.209619
0.04938	0.209921
0.049428	0.210224
0.049544	0.210526
0.04956	0.210829
0.049584	0.211131
0.049596	0.211434
0.049696	0.211736
0.049712	0.212039
0.049756	0.212341
0.049764	0.212644
0.049824	0.212946
0.049836	0.213249
0.049868	0.213551
0.05	0.213854
0.050068	0.214156
0.050192	0.214459
0.050364	0.214761
0.050384	0.215064
0.050392	0.215366
0.0504	0.215668
0.05044	0.215971
0.050516	0.216273
0.050532	0.216576
0.050592	0.216878
0.050728	0.217181
0.050732	0.217483
0.050844	0.217786
0.050848	0.218088
0.050852	0.218391
0.05086	0.218693
0.050864	0.218996
0.050884	0.219298
0.050952	0.219601
0.050996	0.219903
0.051028	0.220206
0.051056	0.220508
0.051152	0.221113
0.05122	0.221416
0.051256	0.221718
0.051284	0.222021
0.051316	0.222323
0.051352	0.222626
0.051384	0.222928
0.051412	0.22323
0.051448	0.223533
0.051488	0.223835
0.051492	0.224138
0.051596	0.22444
0.051608	0.224743
0.051656	0.225045
0.0517	0.22565
0.051776	0.225953
0.0519	0.226255
0.05194	0.226558
0.051988	0.22686
0.052008	0.227163
0.052012	0.227465
0.052056	0.227768
0.052144	0.22807
0.052172	0.228373
0.052212	0.228675
0.05222	0.228978
0.052228	0.22928
0.052232	0.229583
0.052276	0.229885
0.052284	0.230188
0.052312	0.23049
0.05234	0.230792
0.05238	0.231095
0.052428	0.231397
0.052456	0.2317
0.052468	0.232002
0.052476	0.232305
0.052504	0.232607
0.05254	0.23291
0.052588	0.233212
0.052744	0.233515
0.052892	0.233817
0.052952	0.23412
0.05296	0.234422
0.052984	0.234725
0.053108	0.235027
0.053128	0.23533
0.053148	0.235632
0.0532	0.235935
0.053268	0.236237
0.053344	0.23654
0.053368	0.236842
0.053408	0.237145
0.05344	0.237447
0.053524	0.23775
0.053648	0.238052
0.05368	0.238355
0.053692	0.238657
0.053704	0.238959
0.053864	0.239262
0.053908	0.239564
0.053932	0.239867
0.05402	0.240169
0.054068	0.240472
0.054088	0.240774
0.05424	0.241077
0.054252	0.241379
0.05426	0.241682
0.054348	0.241984
0.054452	0.242287
0.054508	0.242589
0.054608	0.242892
0.054764	0.243194
0.054788	0.243497
0.054812	0.243799
0.05484	0.244102
0.05488	0.244404
0.054936	0.244707
0.054952	0.245009
0.054956	0.245312
0.054976	0.245614
0.055	0.245917
0.055016	0.246219
0.055044	0.246521
0.055056	0.246824
0.055092	0.247126
0.055136	0.247731
0.0552	0.248034
0.055228	0.248336
0.055348	0.248639
0.055508	0.248941
0.055532	0.249244
0.05558	0.249546
0.05562	0.249849
0.055624	0.250151
0.055632	0.250454
0.055648	0.251059
0.055724	0.251361
0.055744	0.251966
0.055752	0.252269
0.055808	0.252571
0.055812	0.252874
0.055824	0.253176
0.055856	0.253479
0.055908	0.253781
0.056068	0.254083
0.05632	0.254386
0.056324	0.254688
0.056368	0.254991
0.056408	0.255293
0.056444	0.255596
0.05646	0.255898
0.05654	0.256201
0.056584	0.256503
0.056596	0.256806
0.056604	0.257108
0.056612	0.257411
0.05662	0.257713
0.05698	0.258016
0.057072	0.258318
0.05712	0.258923
0.057208	0.259226
0.05728	0.259528
0.057372	0.259831
0.057496	0.260133
0.05752	0.260436
0.057656	0.260738
0.057736	0.261041
0.057744	0.261343
0.057828	0.261645
0.057952	0.261948
0.058012	0.26225
0.058048	0.262553
0.058064	0.262855
0.058216	0.263158
0.058232	0.26346
0.058508	0.263763
0.058528	0.264065
0.058536	0.264368
0.058548	0.26467
0.058568	0.264973
0.058688	0.265275
0.058816	0.26588
0.058828	0.266485
0.05884	0.266788
0.058896	0.26709
0.058904	0.267393
0.058912	0.267695
0.059064	0.267998
0.05914	0.268603
0.059144	0.268905
0.0592	0.269208
0.059244	0.26951
0.059272	0.269812
0.059464	0.270115
0.05956	0.270417
0.059576	0.27072
0.0596	0.271022
0.059736	0.271325
0.059776	0.271627
0.059788	0.27193
0.059856	0.272232
0.059904	0.272535
0.05998	0.272837
0.060052	0.27314
0.060076	0.273442
0.0601	0.273745
0.060136	0.274047
0.060172	0.27435
0.060312	0.274652
0.060364	0.274955
0.06058	0.275257
0.060588	0.27556
0.06062	0.275862
0.060632	0.276165
0.060644	0.276467
0.060748	0.27677
0.0608	0.277072
0.060836	0.277374
0.060972	0.277677
0.061052	0.277979
0.061056	0.278282
0.061164	0.278584
0.061184	0.278887
0.061252	0.279189
0.061276	0.279492
0.061308	0.279794
0.061328	0.280399
0.061444	0.280702
0.061504	0.281004
0.06154	0.281307
0.061664	0.281609
0.061724	0.281912
0.061736	0.282214
0.06174	0.282517
0.061772	0.282819
0.061816	0.283122
0.061828	0.283424
0.061972	0.283727
0.062012	0.284029
0.062072	0.284332
0.062088	0.284634
0.062148	0.284936
0.062184	0.285239
0.062208	0.285541
0.062212	0.285844
0.062268	0.286146
0.062292	0.286449
0.062388	0.286751
0.062404	0.287054
0.062456	0.287356
0.062484	0.287659
0.062584	0.287961
0.062608	0.288264
0.062708	0.288566
0.06272	0.288869
0.062724	0.289171
0.06274	0.289474
0.06278	0.289776
0.062808	0.290079
0.062868	0.290381
0.062952	0.290684
0.062956	0.290986
0.063032	0.291289
0.063048	0.291591
0.063052	0.291894
0.063188	0.292498
0.063252	0.292801
0.0634	0.293406
0.063452	0.293708
0.063548	0.294011
0.063664	0.294313
0.06372	0.294616
0.063764	0.294918
0.063796	0.295221
0.0639	0.295523
0.063928	0.295826
0.063976	0.296128
0.064052	0.296431
0.064076	0.296733
0.064092	0.297036
0.0641	0.297338
0.064116	0.297641
0.064136	0.297943
0.064184	0.298246
0.064232	0.298548
0.064352	0.298851
0.064404	0.299153
0.064412	0.299456
0.064468	0.299758
0.06448	0.30006
0.064484	0.300363
0.064496	0.300665
0.064516	0.300968
0.064584	0.30127
0.064628	0.301573
0.06466	0.301875
0.064696	0.302178
0.0647	0.302783
0.064796	0.303085
0.064808	0.303388
0.064828	0.30369
0.064896	0.303993
0.064904	0.304295
0.065048	0.304598
0.065068	0.3049
0.065128	0.305203
0.065152	0.305505
0.06516	0.305808
0.065236	0.30611
0.065244	0.306413
0.065248	0.306715
0.065272	0.307018
0.065296	0.307623
0.065524	0.307925
0.065752	0.308227
0.065756	0.30853
0.065764	0.308832
0.065916	0.309135
0.065928	0.309437
0.066036	0.30974
0.06614	0.310042
0.066248	0.310345
0.06632	0.310647
0.066324	0.31095
0.066424	0.311252
0.066464	0.311555
0.066496	0.311857
0.066548	0.31216
0.066616	0.312462
0.066624	0.312765
0.066628	0.313067
0.066644	0.31337
0.066684	0.313975
0.066724	0.314277
0.066844	0.31458
0.066888	0.315185
0.06702	0.315487
0.06704	0.315789
0.06724	0.316092
0.067304	0.316394
0.067428	0.316697
0.067432	0.316999
0.067468	0.317302
0.06756	0.317604
0.06758	0.317907
0.067632	0.318209
0.067648	0.318512
0.067732	0.318814
0.067824	0.319117
0.067868	0.319419
0.067876	0.319722
0.067884	0.320024
0.067968	0.320327
0.068004	0.320629
0.068024	0.320932
0.068244	0.321234
0.068272	0.321537
0.068388	0.321839
0.068412	0.322142
0.06842	0.322444
0.06844	0.322747
0.068572	0.323049
0.0689	0.323654
0.068932	0.323956
0.068972	0.324259
0.069068	0.324561
0.069128	0.324864
0.06928	0.325166
0.069452	0.325469
0.069568	0.325771
0.06972	0.326074
0.0698	0.326376
0.069812	0.326679
0.069856	0.326981
0.069872	0.327284
0.069896	0.327586
0.069988	0.327889
0.070112	0.328191
0.07022	0.328494
0.070228	0.328796
0.070232	0.329099
0.070292	0.329401
0.070364	0.329704
0.070488	0.330006
0.070496	0.330309
0.070576	0.330611
0.070728	0.330913
0.07088	0.331216
0.070916	0.331518
0.070996	0.331821
0.07128	0.332123
0.07134	0.332426
0.07138	0.333031
0.071404	0.333333
0.071464	0.333636
0.071492	0.333938
0.071516	0.334241
0.07152	0.334543
0.071568	0.334846
0.071604	0.335148
0.071612	0.335451
0.071724	0.335753
0.071732	0.336056
0.071768	0.336358
0.071824	0.336661
0.071832	0.336963
0.071872	0.337266
0.071928	0.337568
0.071976	0.337871
0.07202	0.338173
0.07204	0.338475
0.072136	0.338778
0.07214	0.339383
0.072168	0.339685
0.072244	0.339988
0.072272	0.340593
0.07242	0.340895
0.07248	0.341198
0.072568	0.341803
0.0726	0.342105
0.072624	0.342408
0.072852	0.34271
0.0729	0.343013
0.072904	0.343315
0.072916	0.343618
0.07304	0.34392
0.073088	0.344223
0.073124	0.344525
0.073224	0.344828
0.073244	0.34513
0.073356	0.345433
0.07346	0.345735
0.073512	0.346038
0.073536	0.34634
0.073548	0.346642
0.0736	0.346945
0.073732	0.347247
0.07414	0.34755
0.074168	0.347852
0.074412	0.348155
0.07442	0.348457
0.074772	0.34876
0.074844	0.349062
0.074892	0.349365
0.074916	0.349667
0.074952	0.34997
0.075012	0.350272
0.075076	0.350575
0.07512	0.350877
0.075252	0.35118
0.075384	0.351482
0.07542	0.351785
0.075436	0.352087
0.075476	0.35239
0.07548	0.352692
0.075496	0.352995
0.075508	0.353297
0.07558	0.3536
0.075688	0.353902
0.075704	0.354204
0.07582	0.354507
0.07586	0.354809
0.075932	0.355112
0.076008	0.355414
0.076056	0.355717
0.076088	0.356019
0.076096	0.356322
0.07614	0.356624
0.076152	0.356927
0.076172	0.357229
0.076308	0.357532
0.076352	0.357834
0.076504	0.358137
0.076536	0.358439
0.07656	0.358742
0.076716	0.359044
0.076772	0.359347
0.076928	0.359649
0.076956	0.359952
0.076964	0.360254
0.077128	0.360557
0.07728	0.360859
0.077448	0.361162
0.077508	0.361464
0.077524	0.361766
0.077536	0.362069
0.077576	0.362371
0.077632	0.362674
0.07774	0.363279
0.077812	0.363581
0.077948	0.363884
0.078136	0.364186
0.07814	0.364489
0.078192	0.364791
0.0782	0.365094
0.078216	0.365396
0.078308	0.365699
0.078352	0.366001
0.078372	0.366304
0.078532	0.366606
0.078632	0.366909
0.07864	0.367211
0.078728	0.367514
0.078748	0.367816
0.078792	0.368119
0.078892	0.368421
0.07898	0.368724
0.079004	0.369026
0.079096	0.369328
0.079144	0.369631
0.079224	0.369933
0.0793	0.370236
0.079348	0.370538
0.07938	0.370841
0.079444	0.371143
0.079588	0.371446
0.079668	0.371748
0.079692	0.372051
0.079704	0.372656
0.079712	0.372958
0.079716	0.373563
0.07976	0.374168
0.079832	0.374471
0.079896	0.374773
0.079976	0.375076
0.080008	0.375378
0.080096	0.375681
0.080116	0.375983
0.080128	0.376286
0.080132	0.376588
0.080224	0.376891
0.080228	0.377193
0.080304	0.377495
0.080368	0.3781
0.080448	0.378403
0.080648	0.378705
0.080712	0.379008
0.080728	0.37931
0.080744	0.379613
0.080796	0.379915
0.080808	0.380218
0.081048	0.38052
0.081068	0.380823
0.0811	0.381125
0.081112	0.381428
0.081128	0.38173
0.081256	0.382033
0.081296	0.382335
0.081388	0.38294
0.081448	0.383243
0.081472	0.383545
0.081532	0.383848
0.081548	0.38415
0.08164	0.384453
0.081652	0.384755
0.081788	0.385057
0.081856	0.38536
0.081876	0.385662
0.08212	0.385965
0.082136	0.386267
0.082224	0.38657
0.082256	0.386872
0.082348	0.387175
0.082464	0.387477
0.082548	0.38778
0.082588	0.388082
0.08262	0.388385
0.082628	0.388687
0.082688	0.38899
0.082788	0.389292
0.082872	0.389595
0.082888	0.389897
0.082928	0.3902
0.082968	0.390502
0.083008	0.390805
0.08306	0.391107
0.083076	0.39141
0.083104	0.391712
0.083168	0.392015
0.083212	0.392317
0.083248	0.392619
0.083384	0.392922
0.0834	0.393224
0.083428	0.393527
0.083468	0.393829
0.083536	0.394132
0.083636	0.394434
0.083748	0.394737
0.08384	0.395039
0.0839	0.395342
0.084036	0.395644
0.084084	0.396249
0.084112	0.396552
0.084116	0.396854
0.084128	0.397157
0.084176	0.397459
0.084184	0.397762
0.084192	0.398064
0.084264	0.398367
0.084292	0.398669
0.084324	0.398972
0.08442	0.399274
0.08446	0.399577
0.084564	0.399879
0.084608	0.400484
0.084624	0.400786
0.084628	0.401089
0.084636	0.401391
0.084728	0.401694
0.084832	0.401996
0.084904	0.402601
0.084944	0.403206
0.085032	0.403811
0.085084	0.404114
0.085108	0.404416
0.085112	0.404719
0.085128	0.405021
0.085228	0.405324
0.085408	0.405626
0.085432	0.405929
0.08558	0.406231
0.085592	0.406534
0.085644	0.406836
0.085708	0.407139
0.085812	0.407441
0.085828	0.407743
0.085864	0.408046
0.08602	0.408348
0.086056	0.408651
0.086064	0.408953
0.086244	0.409256
0.086268	0.409558
0.086436	0.409861
0.08656	0.410163
0.086632	0.410466
0.086664	0.410768
0.086712	0.411071
0.086744	0.411373
0.086816	0.411676
0.086828	0.411978
0.086868	0.412281
0.086888	0.412583
0.086928	0.412886
0.08704	0.413188
0.08706	0.413491
0.087092	0.413793
0.087104	0.414096
0.08722	0.414398
0.087224	0.414701
0.087436	0.415003
0.087444	0.415306
0.087484	0.415608
0.087544	0.41591
0.087624	0.416213
0.087628	0.416515
0.087632	0.416818
0.087856	0.41712
0.087936	0.417423
0.08816	0.417725
0.088228	0.418028
0.088268	0.41833
0.088304	0.418633
0.088336	0.418935
0.088368	0.419238
0.08842	0.41954
0.0885	0.419843
0.088632	0.420145
0.08876	0.420448
0.088788	0.42075
0.08892	0.421053
0.088968	0.421355
0.088984	0.421658
0.089	0.42196
0.089116	0.422263
0.0894	0.422565
0.08942	0.422868
0.089432	0.42317
0.089452	0.423472
0.08956	0.423775
0.089612	0.424077
0.089704	0.42438
0.089744	0.424682
0.089832	0.424985
0.089864	0.425287
0.089952	0.42559
0.089964	0.425892
0.09002	0.426195
0.090036	0.426497
0.090252	0.4268
0.090388	0.427405
0.090452	0.427707
0.090544	0.42801
0.090556	0.428615
0.090612	0.428917
0.09074	0.42922
0.090776	0.429522
0.09088	0.429825
0.090908	0.43043
0.090924	0.431034
0.09096	0.431337
0.09098	0.431639
0.09122	0.431942
0.0913	0.432244
0.091352	0.432547
0.091364	0.432849
0.091404	0.433152
0.091416	0.433454
0.091428	0.433757
0.091456	0.434059
0.091488	0.434362
0.091492	0.434664
0.091524	0.434967
0.091556	0.435269
0.091668	0.435572
0.0917	0.435874
0.091716	0.436177
0.091904	0.436479
0.091992	0.436782
0.09214	0.437084
0.092188	0.437387
0.09242	0.437689
0.092512	0.437992
0.092568	0.438596
0.092572	0.438899
0.092616	0.439201
0.092668	0.439504
0.092724	0.439806
0.092732	0.440109
0.0929	0.440411
0.092928	0.440714
0.093016	0.441016
0.09318	0.441319
0.093212	0.441621
0.093236	0.441924
0.093248	0.442226
0.093632	0.442529
0.093652	0.442831
0.093668	0.443134
0.093748	0.443436
0.09382	0.443739
0.093888	0.444041
0.093948	0.444344
0.093996	0.444646
0.09404	0.444949
0.094056	0.445251
0.094084	0.445554
0.0943	0.445856
0.094324	0.446158
0.094536	0.446461
0.09458	0.446763
0.094852	0.447066
0.094908	0.447368
0.095016	0.447671
0.09514	0.447973
0.095196	0.448276
0.095352	0.448578
0.095364	0.448881
0.095608	0.449183
0.09564	0.449486
0.09574	0.449788
0.095788	0.450091
0.095896	0.450393
0.095912	0.450696
0.09594	0.450998
0.096	0.451301
0.096144	0.451603
0.096344	0.451906
0.096348	0.452208
0.096364	0.452511
0.09638	0.452813
0.096524	0.453116
0.0966	0.453418
0.09666	0.453721
0.096668	0.454023
0.096708	0.454325
0.096716	0.454628
0.09678	0.45493
0.096892	0.455233
0.096928	0.455535
0.096936	0.455838
0.097148	0.45614
0.097272	0.456443
0.097312	0.456745
0.09736	0.457048
0.097568	0.45735
0.097616	0.457653
0.097688	0.457955
0.097808	0.458258
0.097876	0.45856
0.097884	0.458863
0.097968	0.459165
0.097984	0.459468
0.09808	0.45977
0.09812	0.460073
0.098244	0.460375
0.09834	0.460678
0.098392	0.46098
0.098452	0.461283
0.098516	0.461585
0.098552	0.461887
0.09858	0.46219
0.098584	0.462492
0.098588	0.462795
0.098596	0.463097
0.09862	0.4634
0.09868	0.463702
0.098704	0.464005
0.09882	0.464307
0.098832	0.46461
0.098924	0.464912
0.09894	0.465215
0.099008	0.465517
0.099108	0.46582
0.099348	0.466122
0.09946	0.466425
0.099516	0.466727
0.099644	0.46703
0.099956	0.467332
0.100016	0.467635
0.100144	0.467937
0.100196	0.46824
0.1002	0.468542
0.100224	0.468845
0.100248	0.469147
0.100396	0.469449
0.100464	0.469752
0.100472	0.470054
0.100508	0.470357
0.100556	0.470659
0.100608	0.470962
0.100612	0.471264
0.100788	0.471567
0.100804	0.471869
0.100828	0.472172
0.10092	0.472474
0.1011	0.472777
0.101128	0.473079
0.101148	0.473382
0.10132	0.473684
0.101452	0.473987
0.101564	0.474289
0.101624	0.474592
0.101776	0.474894
0.1018	0.475499
0.101848	0.475802
0.101864	0.476104
0.101944	0.476407
0.101976	0.476709
0.1021	0.477011
0.102144	0.477314
0.102196	0.477616
0.102232	0.477919
0.102244	0.478221
0.102248	0.478524
0.102508	0.478826
0.102672	0.479129
0.1027	0.479431
0.102844	0.479734
0.103148	0.480036
0.103204	0.480339
0.103288	0.480641
0.10334	0.480944
0.103388	0.481246
0.1034	0.481549
0.103448	0.481851
0.103528	0.482154
0.103584	0.482456
0.10378	0.482759
0.10382	0.483061
0.103836	0.483364
0.103928	0.483666
0.103976	0.483969
0.103988	0.484271
0.104004	0.484876
0.104016	0.485178
0.104108	0.485481
0.104112	0.485783
0.104196	0.486086
0.104316	0.486388
0.10432	0.486691
0.104416	0.486993
0.1046	0.487296
0.104752	0.487598
0.104812	0.487901
0.104832	0.488203
0.104876	0.488506
0.104904	0.488808
0.105052	0.489111
0.10518	0.489413
0.105224	0.489716
0.10532	0.490018
0.105436	0.490321
0.105496	0.490623
0.105512	0.490926
0.105608	0.491228
0.105904	0.491531
0.105992	0.491833
0.106148	0.492136
0.1062	0.492438
0.1063	0.49274
0.106348	0.493345
0.106444	0.493648
0.106452	0.49395
0.106648	0.494253
0.106832	0.494555
0.106932	0.494858
0.107044	0.49516
0.107108	0.495463
0.107148	0.495765
0.107164	0.496068
0.107236	0.49637
0.107392	0.496673
0.107432	0.496975
0.10744	0.497278
0.107476	0.49758
0.107484	0.497883
0.107492	0.498185
0.107592	0.498488
0.107836	0.49879
0.107908	0.499093
0.10792	0.499395
0.10814	0.499698
0.108268	0.5
0.108296	0.500302
0.108516	0.500605
0.108624	0.500907
0.108632	0.50121
0.108692	0.501512
0.108708	0.501815
0.108812	0.502117
0.10888	0.50242
0.10924	0.502722
0.109308	0.503025
0.10936	0.503327
0.109444	0.50363
0.109468	0.503932
0.109504	0.504235
0.109528	0.504537
0.109664	0.50484
0.10968	0.505142
0.109712	0.505445
0.10972	0.505747
0.109744	0.50605
0.109924	0.506352
0.109988	0.506655
0.11002	0.506957
0.110024	0.50726
0.110176	0.507562
0.110228	0.507864
0.110328	0.508167
0.110556	0.508469
0.11056	0.508772
0.110588	0.509074
0.110596	0.509377
0.11062	0.509679
0.11074	0.509982
0.110764	0.510284
0.1108	0.510587
0.11088	0.510889
0.110988	0.511192
0.111036	0.511494
0.111176	0.511797
0.111264	0.512099
0.111304	0.512402
0.111384	0.512704
0.111592	0.513007
0.111764	0.513309
0.111796	0.513612
0.111848	0.513914
0.111928	0.514217
0.112288	0.514519
0.112356	0.514822
0.112364	0.515124
0.112372	0.515426
0.112576	0.515729
0.112676	0.516334
0.112828	0.516636
0.113152	0.516939
0.113212	0.517241
0.113276	0.517846
0.113468	0.518149
0.113524	0.518451
0.113564	0.518754
0.113656	0.519056
0.113796	0.519359
0.113816	0.519661
0.114084	0.519964
0.114136	0.520266
0.114276	0.520569
0.114404	0.520871
0.114424	0.521174
0.11446	0.521476
0.114464	0.521779
0.11468	0.522081
0.11472	0.522384
0.114732	0.522686
0.114788	0.522989
0.11488	0.523291
0.11492	0.523593
0.11494	0.523896
0.114976	0.524198
0.114988	0.524501
0.11512	0.524803
0.115208	0.525106
0.115396	0.525408
0.1155	0.525711
0.115536	0.526013
0.115568	0.526316
0.115608	0.526618
0.115744	0.526921
0.115784	0.527223
0.115832	0.527526
0.115852	0.527828
0.116108	0.528131
0.116116	0.528433
0.116124	0.528736
0.11618	0.529038
0.116292	0.529341
0.1163	0.529643
0.116356	0.529946
0.116388	0.530248
0.116392	0.530551
0.116604	0.530853
0.116688	0.531155
0.116752	0.531458
0.116956	0.53176
0.11702	0.532063
0.117072	0.532365
0.117088	0.532668
0.117296	0.53297
0.117364	0.533273
0.117392	0.533575
0.117448	0.533878
0.11748	0.53418
0.117484	0.534483
0.117584	0.534785
0.1177	0.535088
0.11772	0.53539
0.117868	0.535693
0.117872	0.535995
0.118172	0.536298
0.118176	0.5366
0.11824	0.536903
0.118416	0.537205
0.118552	0.537508
0.118568	0.53781
0.118576	0.538113
0.11864	0.538415
0.11866	0.538717
0.118832	0.53902
0.118868	0.539322
0.118964	0.539625
0.119008	0.539927
0.119204	0.54023
0.11932	0.540532
0.119568	0.540835
0.119692	0.541137
0.119704	0.54144
0.11974	0.541742
0.119792	0.542045
0.119884	0.542347
0.120092	0.54265
0.120244	0.542952
0.120316	0.543255
0.120332	0.543557
0.12034	0.54386
0.120364	0.544162
0.120368	0.544465
0.120372	0.544767
0.120452	0.54507
0.120584	0.545372
0.120664	0.545675
0.120736	0.545977
0.120752	0.546279
0.12078	0.546582
0.121036	0.546884
0.121064	0.547187
0.121088	0.547489
0.121108	0.547792
0.121192	0.548094
0.121228	0.548397
0.121328	0.548699
0.12134	0.549002
0.121356	0.549304
0.121376	0.549607
0.121456	0.549909
0.121536	0.550212
0.121652	0.550514
0.121704	0.550817
0.121724	0.551119
0.121736	0.551422
0.121756	0.551724
0.121832	0.552632
0.122028	0.552934
0.12206	0.553237
0.122176	0.553539
0.1222	0.553842
0.122356	0.554144
0.12236	0.554446
0.12244	0.554749
0.122708	0.555051
0.122936	0.555354
0.122976	0.555656
0.12304	0.555959
0.123112	0.556261
0.123224	0.556564
0.123308	0.556866
0.123444	0.557169
0.123452	0.557471
0.123488	0.557774
0.123528	0.558076
0.123544	0.558379
0.12356	0.558681
0.123736	0.558984
0.123788	0.559286
0.123896	0.559589
0.12392	0.559891
0.123936	0.560194
0.123992	0.560496
0.124104	0.560799
0.1242	0.561101
0.124236	0.561404
0.12426	0.561706
0.124276	0.562008
0.124456	0.562311
0.124536	0.562613
0.124672	0.562916
0.124724	0.563218
0.124728	0.563521
0.124792	0.563823
0.124964	0.564126
0.125188	0.564428
0.125192	0.564731
0.1253	0.565033
0.125364	0.565336
0.125384	0.565638
0.125496	0.565941
0.125596	0.566243
0.125632	0.566546
0.125824	0.566848
0.125848	0.567151
0.125936	0.567453
0.126012	0.567756
0.126056	0.568058
0.126112	0.568361
0.126204	0.568663
0.126244	0.568966
0.126636	0.569268
0.126668	0.56957
0.126672	0.569873
0.126828	0.570175
0.127048	0.570478
0.127164	0.57078
0.12718	0.571083
0.127296	0.571385
0.127376	0.571688
0.127404	0.57199
0.127472	0.572293
0.127476	0.572595
0.127612	0.572898
0.127772	0.5732
0.12778	0.573503
0.127828	0.573805
0.127888	0.574108
0.127968	0.57441
0.128012	0.574713
0.12824	0.575015
0.128244	0.575318
0.128312	0.57562
0.128428	0.575923
0.128516	0.576225
0.1286	0.576528
0.128756	0.57683
0.128872	0.577132
0.129104	0.577435
0.129388	0.577737
0.129564	0.57804
0.129668	0.578342
0.129776	0.578645
0.129848	0.578947
0.129984	0.57925
0.130096	0.579552
0.13014	0.579855
0.130248	0.580157
0.130296	0.58046
0.130404	0.580762
0.130464	0.581065
0.130504	0.581367
0.130772	0.58167
0.130848	0.581972
0.131068	0.582275
0.13108	0.582577
0.131112	0.58288
0.131144	0.583182
0.131208	0.583485
0.131288	0.583787
0.131492	0.58409
0.131496	0.584392
0.131876	0.584694
0.131928	0.584997
0.132004	0.585299
0.132136	0.585602
0.132208	0.585904
0.132328	0.586207
0.132508	0.586509
0.132604	0.586812
0.132656	0.587114
0.132684	0.587417
0.132744	0.587719
0.132828	0.588022
0.132868	0.588324
0.132968	0.588627
0.132996	0.588929
0.133024	0.589232
0.133184	0.589837
0.133356	0.590139
0.13338	0.590442
0.133424	0.590744
0.133632	0.591047
0.133656	0.591349
0.1337	0.591652
0.133892	0.591954
0.13412	0.592257
0.134204	0.592559
0.13428	0.592861
0.134292	0.593164
0.134296	0.593466
0.134348	0.593769
0.134396	0.594071
0.134424	0.594374
0.134624	0.594676
0.134748	0.594979
0.134804	0.595584
0.13486	0.595886
0.135176	0.596189
0.13522	0.596491
0.13524	0.596794
0.135708	0.597096
0.135716	0.597399
0.135728	0.597701
0.135792	0.598004
0.13586	0.598306
0.135932	0.598609
0.136096	0.598911
0.136108	0.599214
0.136232	0.599516
0.13628	0.599819
0.136304	0.600121
0.136316	0.600423
0.136548	0.600726
0.136556	0.601028
0.136852	0.601331
0.136932	0.601633
0.137068	0.601936
0.137148	0.602238
0.137192	0.602541
0.13728	0.602843
0.137632	0.603146
0.137696	0.603448
0.137984	0.603751
0.137996	0.604053
0.138348	0.604356
0.138372	0.604658
0.138416	0.604961
0.138552	0.605263
0.138556	0.605566
0.138848	0.605868
0.13888	0.606171
0.13896	0.606473
0.13924	0.606776
0.139268	0.607078
0.13934	0.607381
0.13936	0.607683
0.139476	0.607985
0.139664	0.608288
0.139684	0.60859
0.139796	0.608893
0.1398	0.609195
0.139888	0.609498
0.140692	0.6098
0.140868	0.610103
0.140912	0.610405
0.141048	0.610708
0.141104	0.61101
0.141128	0.611313
0.141172	0.611615
0.14132	0.611918
0.141376	0.61222
0.141416	0.612523
0.141548	0.612825
0.141616	0.613128
0.14164	0.613733
0.141712	0.614035
0.14218	0.614338
0.142264	0.61464
0.14236	0.614943
0.142388	0.615245
0.14254	0.615547
0.14268	0.61585
0.142684	0.616152
0.142712	0.616455
0.142768	0.616757
0.142812	0.61706
0.14292	0.617362
0.143024	0.617665
0.143168	0.617967
0.14318	0.61827
0.143268	0.618572
0.143496	0.618875
0.143604	0.619177
0.143656	0.61948
0.143896	0.619782
0.143984	0.620085
0.144056	0.620387
0.14406	0.62069
0.144136	0.620992
0.14414	0.621295
0.144208	0.621597
0.144212	0.6219
0.14436	0.622202
0.144592	0.622505
0.14462	0.622807
0.144844	0.623109
0.144988	0.623412
0.14512	0.624017
0.14514	0.624319
0.145276	0.624622
0.145304	0.624924
0.145416	0.625227
0.145524	0.625529
0.145668	0.625832
0.145856	0.626134
0.145868	0.626739
0.146064	0.627042
0.146144	0.627344
0.146232	0.627647
[truncated: 3,523 more rows]

## Sheet: R712L - 1000uM ATP
	R712L 1000 µM ATP
0.02	0
0.020098	0.00512976
0.020196	0.0102263
0.020294	0.0152899
0.020392	0.0203207
0.02049	0.025319
0.0205881	0.030285
0.0206861	0.0352188
0.0207841	0.0401208
0.0208821	0.044991
0.0209801	0.0498299
0.0210781	0.0546374
0.0211761	0.0594139
0.0212741	0.0641596
0.0213721	0.0688746
0.0214701	0.0735592
0.0215682	0.0782135
0.0216662	0.0828378
0.0217642	0.0874323
0.0218622	0.0919972
0.0219602	0.0965326
0.0220582	0.101039
0.0221562	0.105516
0.0222542	0.109964
0.0223522	0.114384
0.0224502	0.118775
0.0225483	0.123138
0.0226463	0.127473
0.0227443	0.13178
0.0228423	0.136059
0.0229403	0.140311
0.0230383	0.144535
0.0231363	0.148732
0.0232343	0.152902
0.0233323	0.157046
0.0234303	0.161162
0.0235284	0.165253
0.0236264	0.169317
0.0237244	0.173355
0.0238224	0.177367
0.0239204	0.181353
0.0240184	0.185314
0.0241164	0.189249
0.0242144	0.193159
0.0243124	0.197044
0.0244104	0.200904
0.0245085	0.204739
0.0246065	0.20855
0.0247045	0.212336
0.0248025	0.216099
0.0249005	0.219837
0.0249985	0.223551
0.0250965	0.227241
0.0251945	0.230908
0.0252925	0.234551
0.0253905	0.238171
0.0254885	0.241768
0.0255866	0.245342
0.0256846	0.248893
0.0257826	0.252421
0.0258806	0.255927
0.0259786	0.25941
0.0260766	0.262872
0.0261746	0.266311
0.0262726	0.269728
0.0263706	0.273123
0.0264686	0.276497
0.0265667	0.279849
0.0266647	0.28318
0.0267627	0.28649
0.0268607	0.289779
0.0269587	0.293046
0.0270567	0.296293
0.0271547	0.29952
0.0272527	0.302725
0.0273507	0.305911
0.0274487	0.309076
0.0275468	0.312221
0.0276448	0.315346
0.0277428	0.318451
0.0278408	0.321536
0.0279388	0.324602
0.0280368	0.327649
0.0281348	0.330676
0.0282328	0.333684
0.0283308	0.336673
0.0284288	0.339643
0.0285269	0.342594
0.0286249	0.345526
0.0287229	0.34844
0.0288209	0.351335
0.0289189	0.354213
0.0290169	0.357071
0.0291149	0.359912
0.0292129	0.362735
0.0293109	0.36554
0.0294089	0.368328
0.029507	0.371097
0.029605	0.37385
0.029703	0.376585
0.029801	0.379302
0.029899	0.382003
0.029997	0.384686
0.030095	0.387353
0.030193	0.390003
0.030291	0.392636
0.030389	0.395252
0.030487	0.397852
0.0305851	0.400436
0.0306831	0.403004
0.0307811	0.405555
0.0308791	0.40809
0.0309771	0.41061
0.0310751	0.413113
0.0311731	0.415601
0.0312711	0.418073
0.0313691	0.42053
0.0314671	0.422971
0.0315652	0.425398
0.0316632	0.427808
0.0317612	0.430204
0.0318592	0.432585
0.0319572	0.434951
0.0320552	0.437302
0.0321532	0.439638
0.0322512	0.44196
0.0323492	0.444267
0.0324472	0.44656
0.0325453	0.448839
0.0326433	0.451103
0.0327413	0.453353
0.0328393	0.45559
0.0329373	0.457812
0.0330353	0.46002
0.0331333	0.462215
0.0332313	0.464396
0.0333293	0.466563
0.0334273	0.468717
0.0335254	0.470858
0.0336234	0.472985
0.0337214	0.475099
0.0338194	0.4772
0.0339174	0.479288
0.0340154	0.481363
0.0341134	0.483425
0.0342114	0.485474
0.0343094	0.487511
0.0344074	0.489535
0.0345055	0.491547
0.0346035	0.493546
0.0347015	0.495532
0.0347995	0.497507
0.0348975	0.499469
0.0349955	0.501419
0.0350935	0.503357
0.0351915	0.505283
0.0352895	0.507197
0.0353875	0.5091
0.0354855	0.51099
0.0355836	0.512869
0.0356816	0.514737
0.0357796	0.516593
0.0358776	0.518437
0.0359756	0.520271
0.0360736	0.522093
0.0361716	0.523904
0.0362696	0.525703
0.0363676	0.527492
0.0364656	0.52927
0.0365637	0.531036
0.0366617	0.532792
0.0367597	0.534537
0.0368577	0.536272
0.0369557	0.537996
0.0370537	0.539709
0.0371517	0.541412
0.0372497	0.543105
0.0373477	0.544787
0.0374457	0.546459
0.0375438	0.548121
0.0376418	0.549772
0.0377398	0.551414
0.0378378	0.553045
0.0379358	0.554667
0.0380338	0.556279
0.0381318	0.557881
0.0382298	0.559473
0.0383278	0.561056
0.0384258	0.562629
0.0385239	0.564192
0.0386219	0.565746
0.0387199	0.567291
0.0388179	0.568826
0.0389159	0.570352
0.0390139	0.571868
0.0391119	0.573376
0.0392099	0.574874
0.0393079	0.576364
0.0394059	0.577844
0.039504	0.579316
0.039602	0.580778
0.0397	0.582232
0.039798	0.583677
0.039896	0.585113
0.039994	0.586541
0.040092	0.58796
0.04019	0.589371
0.040288	0.590773
0.040386	0.592167
0.040484	0.593552
0.0405821	0.594929
0.0406801	0.596298
0.0407781	0.597659
0.0408761	0.599011
0.0409741	0.600356
0.0410721	0.601692
0.0411701	0.603021
0.0412681	0.604341
0.0413661	0.605654
0.0414641	0.606959
0.0415622	0.608256
0.0416602	0.609545
0.0417582	0.610827
0.0418562	0.612101
0.0419542	0.613368
0.0420522	0.614627
0.0421502	0.615878
0.0422482	0.617122
0.0423462	0.618359
0.0424442	0.619589
0.0425423	0.620811
0.0426403	0.622026
0.0427383	0.623234
0.0428363	0.624434
0.0429343	0.625628
0.0430323	0.626814
0.0431303	0.627994
0.0432283	0.629167
0.0433263	0.630332
0.0434243	0.631491
0.0435224	0.632643
0.0436204	0.633789
0.0437184	0.634927
0.0438164	0.636059
0.0439144	0.637185
0.0440124	0.638303
0.0441104	0.639416
0.0442084	0.640521
0.0443064	0.641621
0.0444044	0.642713
0.0445025	0.6438
0.0446005	0.64488
0.0446985	0.645954
0.0447965	0.647022
0.0448945	0.648083
0.0449925	0.649138
0.0450905	0.650188
0.0451885	0.651231
0.0452865	0.652268
0.0453845	0.653299
0.0454825	0.654324
0.0455806	0.655343
0.0456786	0.656356
0.0457766	0.657364
0.0458746	0.658365
0.0459726	0.659361
0.0460706	0.660351
0.0461686	0.661336
0.0462666	0.662315
0.0463646	0.663288
0.0464626	0.664255
0.0465607	0.665217
0.0466587	0.666174
0.0467567	0.667125
0.0468547	0.668071
0.0469527	0.669011
0.0470507	0.669946
0.0471487	0.670875
0.0472467	0.671799
0.0473447	0.672718
0.0474427	0.673632
0.0475408	0.674541
0.0476388	0.675444
0.0477368	0.676343
0.0478348	0.677236
0.0479328	0.678124
0.0480308	0.679007
0.0481288	0.679885
0.0482268	0.680758
0.0483248	0.681627
0.0484228	0.68249
0.0485209	0.683349
0.0486189	0.684202
0.0487169	0.685051
0.0488149	0.685895
0.0489129	0.686735
0.0490109	0.687569
0.0491089	0.688399
0.0492069	0.689225
0.0493049	0.690046
0.0494029	0.690862
0.049501	0.691673
0.049599	0.69248
0.049697	0.693283
0.049795	0.694081
0.049893	0.694875
0.049991	0.695664
0.050089	0.696449
0.050187	0.69723
0.050285	0.698006
0.050383	0.698778
0.050481	0.699546
0.0505791	0.70031
0.0506771	0.701069
0.0507751	0.701824
0.0508731	0.702575
0.0509711	0.703322
0.0510691	0.704065
0.0511671	0.704803
0.0512651	0.705538
0.0513631	0.706269
0.0514611	0.706995
0.0515592	0.707718
0.0516572	0.708437
0.0517552	0.709151
0.0518532	0.709862
0.0519512	0.710569
0.0520492	0.711273
0.0521472	0.711972
0.0522452	0.712668
0.0523432	0.71336
0.0524412	0.714048
0.0525393	0.714732
0.0526373	0.715413
0.0527353	0.71609
0.0528333	0.716763
0.0529313	0.717433
0.0530293	0.718099
0.0531273	0.718762
0.0532253	0.719421
0.0533233	0.720077
0.0534213	0.720729
0.0535194	0.721377
0.0536174	0.722023
0.0537154	0.722664
0.0538134	0.723303
0.0539114	0.723938
0.0540094	0.724569
0.0541074	0.725197
0.0542054	0.725822
0.0543034	0.726444
0.0544014	0.727062
0.0544994	0.727677
0.0545975	0.728289
0.0546955	0.728897
0.0547935	0.729503
0.0548915	0.730105
0.0549895	0.730704
0.0550875	0.7313
0.0551855	0.731893
0.0552835	0.732483
0.0553815	0.733069
0.0554795	0.733653
0.0555776	0.734233
0.0556756	0.734811
0.0557736	0.735385
0.0558716	0.735957
0.0559696	0.736526
0.0560676	0.737091
0.0561656	0.737654
0.0562636	0.738214
0.0563616	0.738771
0.0564596	0.739325
0.0565577	0.739876
0.0566557	0.740425
0.0567537	0.740971
0.0568517	0.741513
0.0569497	0.742053
0.0570477	0.742591
0.0571457	0.743125
0.0572437	0.743657
0.0573417	0.744187
0.0574397	0.744713
0.0575378	0.745237
0.0576358	0.745758
0.0577338	0.746277
0.0578318	0.746793
0.0579298	0.747306
0.0580278	0.747817
0.0581258	0.748325
0.0582238	0.748831
0.0583218	0.749334
0.0584198	0.749835
0.0585179	0.750333
0.0586159	0.750828
0.0587139	0.751322
0.0588119	0.751812
0.0589099	0.752301
0.0590079	0.752786
0.0591059	0.75327
0.0592039	0.753751
0.0593019	0.75423
0.0593999	0.754706
0.0594979	0.75518
0.059596	0.755652
0.059694	0.756121
0.059792	0.756588
0.05989	0.757053
0.059988	0.757516
0.060086	0.757976
0.060184	0.758434
0.060282	0.75889
0.06038	0.759344
0.060478	0.759795
0.0605761	0.760244
0.0606741	0.760692
0.0607721	0.761136
0.0608701	0.761579
0.0609681	0.76202
0.0610661	0.762459
0.0611641	0.762895
0.0612621	0.763329
0.0613601	0.763762
0.0614581	0.764192
0.0615562	0.76462
0.0616542	0.765046
0.0617522	0.76547
0.0618502	0.765893
0.0619482	0.766313
0.0620462	0.766731
0.0621442	0.767147
0.0622422	0.767561
0.0623402	0.767974
0.0624382	0.768384
0.0625363	0.768793
0.0626343	0.769199
0.0627323	0.769604
0.0628303	0.770007
0.0629283	0.770408
0.0630263	0.770807
0.0631243	0.771204
0.0632223	0.771599
0.0633203	0.771993
0.0634183	0.772385
0.0635164	0.772774
0.0636144	0.773163
0.0637124	0.773549
0.0638104	0.773934
0.0639084	0.774317
0.0640064	0.774698
0.0641044	0.775077
0.0642024	0.775455
0.0643004	0.775831
0.0643984	0.776205
0.0644964	0.776577
0.0645945	0.776948
0.0646925	0.777318
0.0647905	0.777685
0.0648885	0.778051
0.0649865	0.778415
0.0650845	0.778778
0.0651825	0.779139
0.0652805	0.779499
0.0653785	0.779856
0.0654765	0.780213
0.0655746	0.780567
0.0656726	0.780921
0.0657706	0.781272
0.0658686	0.781622
0.0659666	0.781971
0.0660646	0.782318
0.0661626	0.782663
0.0662606	0.783007
0.0663586	0.78335
0.0664566	0.78369
0.0665547	0.78403
0.0666527	0.784368
0.0667507	0.784705
0.0668487	0.78504
0.0669467	0.785373
0.0670447	0.785706
0.0671427	0.786036
0.0672407	0.786366
0.0673387	0.786694
0.0674367	0.78702
0.0675348	0.787346
0.0676328	0.787669
0.0677308	0.787992
0.0678288	0.788313
0.0679268	0.788633
0.0680248	0.788951
0.0681228	0.789268
0.0682208	0.789584
0.0683188	0.789898
0.0684168	0.790212
0.0685149	0.790523
0.0686129	0.790834
0.0687109	0.791143
0.0688089	0.791451
0.0689069	0.791758
0.0690049	0.792063
0.0691029	0.792367
0.0692009	0.79267
0.0692989	0.792972
0.0693969	0.793272
0.0694949	0.793572
0.069593	0.79387
0.069691	0.794167
0.069789	0.794462
0.069887	0.794757
0.069985	0.79505
0.070083	0.795342
0.070181	0.795633
0.070279	0.795922
0.070377	0.796211
0.070475	0.796498
0.0705731	0.796785
0.0706711	0.79707
0.0707691	0.797354
0.0708671	0.797637
0.0709651	0.797918
0.0710631	0.798199
0.0711611	0.798479
0.0712591	0.798757
0.0713571	0.799034
0.0714551	0.799311
0.0715532	0.799586
0.0716512	0.79986
0.0717492	0.800133
0.0718472	0.800405
0.0719452	0.800676
0.0720432	0.800946
0.0721412	0.801215
0.0722392	0.801483
0.0723372	0.80175
0.0724352	0.802016
0.0725333	0.80228
0.0726313	0.802544
0.0727293	0.802807
0.0728273	0.803069
0.0729253	0.80333
0.0730233	0.80359
0.0731213	0.803849
0.0732193	0.804106
0.0733173	0.804363
0.0734153	0.804619
0.0735134	0.804875
0.0736114	0.805129
0.0737094	0.805382
0.0738074	0.805634
0.0739054	0.805885
0.0740034	0.806136
0.0741014	0.806385
0.0741994	0.806634
0.0742974	0.806882
0.0743954	0.807128
0.0744934	0.807374
0.0745915	0.807619
0.0746895	0.807863
0.0747875	0.808107
0.0748855	0.808349
0.0749835	0.808591
0.0750815	0.808831
0.0751795	0.809071
0.0752775	0.80931
0.0753755	0.809548
0.0754735	0.809785
0.0755716	0.810022
0.0756696	0.810257
0.0757676	0.810492
0.0758656	0.810726
0.0759636	0.810959
0.0760616	0.811191
0.0761596	0.811423
0.0762576	0.811654
0.0763556	0.811884
0.0764536	0.812113
0.0765517	0.812341
0.0766497	0.812569
0.0767477	0.812795
0.0768457	0.813021
0.0769437	0.813247
0.0770417	0.813471
0.0771397	0.813695
0.0772377	0.813918
0.0773357	0.81414
0.0774337	0.814361
0.0775318	0.814582
0.0776298	0.814802
0.0777278	0.815021
0.0778258	0.81524
0.0779238	0.815458
0.0780218	0.815675
0.0781198	0.815891
0.0782178	0.816107
0.0783158	0.816322
0.0784138	0.816536
0.0785119	0.81675
0.0786099	0.816963
0.0787079	0.817175
0.0788059	0.817386
0.0789039	0.817597
0.0790019	0.817807
0.0790999	0.818017
0.0791979	0.818225
0.0792959	0.818434
0.0793939	0.818641
0.0794919	0.818848
0.07959	0.819054
0.079688	0.819259
0.079786	0.819464
0.079884	0.819669
0.079982	0.819872
0.08008	0.820075
0.080178	0.820277
0.080276	0.820479
0.080374	0.82068
0.080472	0.820881
0.0805701	0.82108
0.0806681	0.82128
0.0807661	0.821478
0.0808641	0.821676
0.0809621	0.821874
0.0810601	0.82207
0.0811581	0.822267
0.0812561	0.822462
0.0813541	0.822657
0.0814521	0.822852
0.0815502	0.823046
0.0816482	0.823239
0.0817462	0.823432
0.0818442	0.823624
0.0819422	0.823815
0.0820402	0.824006
0.0821382	0.824197
0.0822362	0.824387
0.0823342	0.824576
0.0824322	0.824765
0.0825303	0.824953
0.0826283	0.825141
0.0827263	0.825328
0.0828243	0.825514
0.0829223	0.8257
0.0830203	0.825886
0.0831183	0.826071
0.0832163	0.826255
0.0833143	0.826439
0.0834123	0.826623
0.0835104	0.826806
0.0836084	0.826988
0.0837064	0.82717
0.0838044	0.827351
0.0839024	0.827532
0.0840004	0.827713
0.0840984	0.827892
0.0841964	0.828072
0.0842944	0.828251
0.0843924	0.828429
0.0844904	0.828607
0.0845885	0.828784
0.0846865	0.828961
0.0847845	0.829138
0.0848825	0.829314
0.0849805	0.829489
0.0850785	0.829664
0.0851765	0.829839
0.0852745	0.830013
0.0853725	0.830186
0.0854705	0.83036
0.0855686	0.830532
0.0856666	0.830704
0.0857646	0.830876
0.0858626	0.831048
0.0859606	0.831218
0.0860586	0.831389
0.0861566	0.831559
0.0862546	0.831728
0.0863526	0.831897
0.0864506	0.832066
0.0865487	0.832234
0.0866467	0.832402
0.0867447	0.832569
0.0868427	0.832736
0.0869407	0.832903
0.0870387	0.833069
0.0871367	0.833235
0.0872347	0.8334
0.0873327	0.833565
0.0874307	0.833729
0.0875288	0.833893
0.0876268	0.834057
0.0877248	0.83422
0.0878228	0.834383
0.0879208	0.834545
0.0880188	0.834707
0.0881168	0.834869
0.0882148	0.83503
0.0883128	0.835191
0.0884108	0.835351
0.0885089	0.835511
0.0886069	0.835671
0.0887049	0.83583
0.0888029	0.835989
0.0889009	0.836147
0.0889989	0.836305
0.0890969	0.836463
0.0891949	0.83662
0.0892929	0.836777
0.0893909	0.836934
0.0894889	0.83709
0.089587	0.837246
0.089685	0.837402
0.089783	0.837557
0.089881	0.837712
0.089979	0.837866
0.090077	0.83802
0.090175	0.838174
0.090273	0.838327
0.090371	0.83848
0.090469	0.838633
0.0905671	0.838785
0.0906651	0.838937
0.0907631	0.839089
0.0908611	0.83924
0.0909591	0.839391
0.0910571	0.839541
0.0911551	0.839692
0.0912531	0.839842
0.0913511	0.839991
0.0914491	0.84014
0.0915472	0.840289
0.0916452	0.840438
0.0917432	0.840586
0.0918412	0.840734
0.0919392	0.840882
0.0920372	0.841029
0.0921352	0.841176
0.0922332	0.841323
0.0923312	0.841469
0.0924292	0.841615
0.0925273	0.841761
0.0926253	0.841906
0.0927233	0.842051
0.0928213	0.842196
0.0929193	0.84234
0.0930173	0.842485
0.0931153	0.842628
0.0932133	0.842772
0.0933113	0.842915
0.0934093	0.843058
0.0935074	0.843201
0.0936054	0.843343
0.0937034	0.843485
0.0938014	0.843627
0.0938994	0.843769
0.0939974	0.84391
0.0940954	0.844051
0.0941934	0.844191
0.0942914	0.844332
0.0943894	0.844472
0.0944874	0.844611
0.0945855	0.844751
0.0946835	0.84489
0.0947815	0.845029
0.0948795	0.845168
0.0949775	0.845306
0.0950755	0.845444
0.0951735	0.845582
0.0952715	0.84572
0.0953695	0.845857
0.0954675	0.845994
0.0955656	0.846131
0.0956636	0.846267
0.0957616	0.846403
0.0958596	0.846539
0.0959576	0.846675
0.0960556	0.84681
0.0961536	0.846946
0.0962516	0.84708
0.0963496	0.847215
0.0964476	0.847349
0.0965457	0.847484
0.0966437	0.847617
0.0967417	0.847751
0.0968397	0.847884
0.0969377	0.848018
0.0970357	0.848151
0.0971337	0.848283
0.0972317	0.848416
0.0973297	0.848548
0.0974277	0.84868
0.0975258	0.848811
0.0976238	0.848943
0.0977218	0.849074
0.0978198	0.849205
0.0979178	0.849335
0.0980158	0.849466
0.0981138	0.849596
0.0982118	0.849726
0.0983098	0.849856
0.0984078	0.849985
0.0985059	0.850115
0.0986039	0.850244
0.0987019	0.850373
0.0987999	0.850501
0.0988979	0.85063
0.0989959	0.850758
0.0990939	0.850886
0.0991919	0.851013
0.0992899	0.851141
0.0993879	0.851268
0.0994859	0.851395
0.099584	0.851522
0.099682	0.851648
0.09978	0.851775
0.099878	0.851901
0.099976	0.852027
0.100074	0.852153
0.100172	0.852278
0.10027	0.852403
0.100368	0.852529
0.100466	0.852653
0.100564	0.852778
0.100662	0.852903
0.10076	0.853027
0.100858	0.853151
0.100956	0.853275
0.101054	0.853398
0.101152	0.853522
0.10125	0.853645
0.101348	0.853768
0.101446	0.853891
0.101544	0.854013
0.101642	0.854136
0.10174	0.854258
0.101838	0.85438
0.101936	0.854502
0.102034	0.854623
0.102132	0.854745
0.10223	0.854866
0.102328	0.854987
0.102426	0.855108
0.102524	0.855229
0.102622	0.855349
0.10272	0.855469
0.102818	0.855589
0.102916	0.855709
0.103014	0.855829
0.103112	0.855949
0.10321	0.856068
0.103308	0.856187
0.103406	0.856306
0.103504	0.856425
0.103602	0.856543
0.1037	0.856662
0.103798	0.85678
0.103896	0.856898
0.103994	0.857016
0.104092	0.857134
0.10419	0.857251
0.104288	0.857368
0.104386	0.857486
0.104484	0.857603
0.104582	0.857719
0.10468	0.857836
0.104778	0.857952
0.104876	0.858069
0.104974	0.858185
0.105073	0.858301
0.105171	0.858417
0.105269	0.858532
0.105367	0.858648
0.105465	0.858763
0.105563	0.858878
0.105661	0.858993
0.105759	0.859108
0.105857	0.859222
0.105955	0.859337
0.106053	0.859451
0.106151	0.859565
0.106249	0.859679
0.106347	0.859793
0.106445	0.859906
0.106543	0.86002
0.106641	0.860133
0.106739	0.860246
0.106837	0.860359
0.106935	0.860472
0.107033	0.860584
0.107131	0.860697
0.107229	0.860809
0.107327	0.860921
0.107425	0.861033
0.107523	0.861145
0.107621	0.861257
0.107719	0.861369
0.107817	0.86148
0.107915	0.861591
0.108013	0.861702
0.108111	0.861813
0.108209	0.861924
0.108307	0.862035
0.108405	0.862145
0.108503	0.862255
0.108601	0.862366
0.108699	0.862476
0.108797	0.862586
0.108895	0.862695
0.108993	0.862805
0.109091	0.862914
0.109189	0.863024
0.109287	0.863133
0.109385	0.863242
0.109483	0.863351
0.109581	0.863459
0.109679	0.863568
0.109777	0.863676
0.109875	0.863785
0.109973	0.863893
0.110071	0.864001
0.110169	0.864109
0.110267	0.864217
0.110365	0.864324
0.110463	0.864432
0.110561	0.864539
0.110659	0.864646
0.110757	0.864753
0.110855	0.86486
0.110953	0.864967
0.111051	0.865073
0.111149	0.86518
0.111247	0.865286
0.111345	0.865393
0.111443	0.865499
0.111541	0.865605
0.111639	0.86571
0.111737	0.865816
0.111835	0.865922
0.111933	0.866027
0.112031	0.866132
0.112129	0.866238
0.112227	0.866343
0.112325	0.866448
0.112423	0.866552
0.112521	0.866657
0.112619	0.866762
0.112717	0.866866
0.112815	0.86697
0.112913	0.867074
0.113011	0.867178
0.113109	0.867282
0.113207	0.867386
0.113305	0.86749
0.113403	0.867593
0.113501	0.867697
0.113599	0.8678
0.113697	0.867903
0.113795	0.868006
0.113893	0.868109
0.113991	0.868212
0.114089	0.868314
0.114187	0.868417
0.114285	0.868519
0.114383	0.868622
0.114481	0.868724
0.114579	0.868826
0.114677	0.868928
0.114775	0.86903
0.114873	0.869131
0.114971	0.869233
0.11507	0.869334
0.115168	0.869436
0.115266	0.869537
0.115364	0.869638
0.115462	0.869739
0.11556	0.86984
0.115658	0.869941
0.115756	0.870041
0.115854	0.870142
0.115952	0.870242
0.11605	0.870343
0.116148	0.870443
0.116246	0.870543
0.116344	0.870643
0.116442	0.870743
0.11654	0.870842
0.116638	0.870942
0.116736	0.871042
0.116834	0.871141
0.116932	0.87124
0.11703	0.87134
0.117128	0.871439
0.117226	0.871538
0.117324	0.871636
0.117422	0.871735
0.11752	0.871834
0.117618	0.871932
0.117716	0.872031
0.117814	0.872129
0.117912	0.872227
0.11801	0.872325
0.118108	0.872423
0.118206	0.872521
0.118304	0.872619
0.118402	0.872717
0.1185	0.872814
0.118598	0.872912
0.118696	0.873009
0.118794	0.873106
0.118892	0.873203
0.11899	0.8733
0.119088	0.873397
0.119186	0.873494
0.119284	0.873591
0.119382	0.873688
0.11948	0.873784
0.119578	0.87388
0.119676	0.873977
0.119774	0.874073
0.119872	0.874169
0.11997	0.874265
0.120068	0.874361
0.120166	0.874457
0.120264	0.874553
0.120362	0.874648
0.12046	0.874744
0.120558	0.874839
0.120656	0.874934
0.120754	0.87503
0.120852	0.875125
0.12095	0.87522
0.121048	0.875315
0.121146	0.875409
0.121244	0.875504
0.121342	0.875599
0.12144	0.875693
0.121538	0.875788
0.121636	0.875882
0.121734	0.875976
0.121832	0.87607
0.12193	0.876164
0.122028	0.876258
0.122126	0.876352
0.122224	0.876446
0.122322	0.87654
0.12242	0.876633
0.122518	0.876727
0.122616	0.87682
0.122714	0.876913
0.122812	0.877007
0.12291	0.8771
0.123008	0.877193
0.123106	0.877286
0.123204	0.877378
0.123302	0.877471
0.1234	0.877564
0.123498	0.877656
0.123596	0.877749
0.123694	0.877841
0.123792	0.877933
0.12389	0.878026
0.123988	0.878118
0.124086	0.87821
0.124184	0.878302
0.124282	0.878393
0.12438	0.878485
0.124478	0.878577
0.124576	0.878668
0.124674	0.87876
0.124772	0.878851
0.12487	0.878942
0.124968	0.879034
0.125067	0.879125
0.125165	0.879216
0.125263	0.879307
0.125361	0.879397
0.125459	0.879488
0.125557	0.879579
0.125655	0.879669
0.125753	0.87976
0.125851	0.87985
0.125949	0.879941
0.126047	0.880031
0.126145	0.880121
0.126243	0.880211
0.126341	0.880301
0.126439	0.880391
0.126537	0.880481
0.126635	0.88057
0.126733	0.88066
0.126831	0.88075
0.126929	0.880839
0.127027	0.880928
0.127125	0.881018
0.127223	0.881107
0.127321	0.881196
0.127419	0.881285
0.127517	0.881374
0.127615	0.881463
0.127713	0.881552
0.127811	0.88164
0.127909	0.881729
0.128007	0.881818
0.128105	0.881906
0.128203	0.881994
0.128301	0.882083
0.128399	0.882171
0.128497	0.882259
0.128595	0.882347
0.128693	0.882435
0.128791	0.882523
0.128889	0.882611
0.128987	0.882698
0.129085	0.882786
0.129183	0.882874
0.129281	0.882961
0.129379	0.883049
0.129477	0.883136
0.129575	0.883223
0.129673	0.88331
0.129771	0.883397
0.129869	0.883484
0.129967	0.883571
0.130065	0.883658
0.130163	0.883745
0.130261	0.883832
0.130359	0.883918
0.130457	0.884005
0.130555	0.884091
0.130653	0.884178
0.130751	0.884264
0.130849	0.88435
0.130947	0.884436
0.131045	0.884522
0.131143	0.884608
0.131241	0.884694
0.131339	0.88478
0.131437	0.884866
0.131535	0.884952
0.131633	0.885037
0.131731	0.885123
0.131829	0.885208
0.131927	0.885294
0.132025	0.885379
0.132123	0.885464
0.132221	0.885549
0.132319	0.885634
0.132417	0.885719
0.132515	0.885804
0.132613	0.885889
0.132711	0.885974
0.132809	0.886059
0.132907	0.886143
0.133005	0.886228
0.133103	0.886312
0.133201	0.886397
0.133299	0.886481
0.133397	0.886565
0.133495	0.88665
0.133593	0.886734
0.133691	0.886818
0.133789	0.886902
0.133887	0.886986
0.133985	0.887069
0.134083	0.887153
0.134181	0.887237
0.134279	0.88732
0.134377	0.887404
0.134475	0.887487
0.134573	0.887571
0.134671	0.887654
0.134769	0.887737
0.134867	0.887821
0.134965	0.887904
0.135064	0.887987
0.135162	0.88807
0.13526	0.888152
0.135358	0.888235
0.135456	0.888318
0.135554	0.888401
0.135652	0.888483
0.13575	0.888566
0.135848	0.888648
0.135946	0.888731
0.136044	0.888813
0.136142	0.888895
0.13624	0.888977
0.136338	0.88906
0.136436	0.889142
0.136534	0.889224
0.136632	0.889306
0.13673	0.889387
0.136828	0.889469
0.136926	0.889551
0.137024	0.889632
0.137122	0.889714
0.13722	0.889795
0.137318	0.889877
0.137416	0.889958
0.137514	0.89004
0.137612	0.890121
0.13771	0.890202
0.137808	0.890283
0.137906	0.890364
0.138004	0.890445
0.138102	0.890526
0.1382	0.890607
0.138298	0.890687
0.138396	0.890768
0.138494	0.890849
0.138592	0.890929
0.13869	0.89101
0.138788	0.89109
0.138886	0.89117
0.138984	0.891251
0.139082	0.891331
0.13918	0.891411
0.139278	0.891491
0.139376	0.891571
0.139474	0.891651
0.139572	0.891731
0.13967	0.891811
0.139768	0.89189
0.139866	0.89197
0.139964	0.89205
0.140062	0.892129
0.14016	0.892209
0.140258	0.892288
0.140356	0.892367
0.140454	0.892447
0.140552	0.892526
0.14065	0.892605
0.140748	0.892684
0.140846	0.892763
0.140944	0.892842
0.141042	0.892921
0.14114	0.893
0.141238	0.893079
0.141336	0.893157
0.141434	0.893236
0.141532	0.893314
0.14163	0.893393
0.141728	0.893471
0.141826	0.89355
0.141924	0.893628
0.142022	0.893706
0.14212	0.893785
0.142218	0.893863
0.142316	0.893941
0.142414	0.894019
0.142512	0.894097
0.14261	0.894175
0.142708	0.894252
0.142806	0.89433
0.142904	0.894408
0.143002	0.894485
0.1431	0.894563
0.143198	0.89464
0.143296	0.894718
0.143394	0.894795
0.143492	0.894873
0.14359	0.89495
0.143688	0.895027
0.143786	0.895104
0.143884	0.895181
0.143982	0.895258
0.14408	0.895335
0.144178	0.895412
0.144276	0.895489
0.144374	0.895565
0.144472	0.895642
0.14457	0.895719
0.144668	0.895795
0.144766	0.895872
0.144864	0.895948
0.144962	0.896025
0.145061	0.896101
0.145159	0.896177
0.145257	0.896253
0.145355	0.89633
0.145453	0.896406
0.145551	0.896482
0.145649	0.896558
0.145747	0.896633
0.145845	0.896709
0.145943	0.896785
0.146041	0.896861
0.146139	0.896936
0.146237	0.897012
0.146335	0.897088
0.146433	0.897163
0.146531	0.897238
0.146629	0.897314
0.146727	0.897389
0.146825	0.897464
0.146923	0.897539
0.147021	0.897615
0.147119	0.89769
0.147217	0.897765
0.147315	0.89784
0.147413	0.897914
0.147511	0.897989
0.147609	0.898064
0.147707	0.898139
0.147805	0.898213
0.147903	0.898288
0.148001	0.898362
0.148099	0.898437
0.148197	0.898511
0.148295	0.898586
0.148393	0.89866
0.148491	0.898734
0.148589	0.898808
0.148687	0.898882
0.148785	0.898957
0.148883	0.899031
0.148981	0.899104
0.149079	0.899178
0.149177	0.899252
0.149275	0.899326
0.149373	0.8994
0.149471	0.899473
0.149569	0.899547
0.149667	0.89962
0.149765	0.899694
0.149863	0.899767
0.149961	0.899841
0.150059	0.899914
0.150157	0.899987
0.150255	0.90006
0.150353	0.900134
0.150451	0.900207
0.150549	0.90028
0.150647	0.900353
0.150745	0.900426
0.150843	0.900498
0.150941	0.900571
0.151039	0.900644
0.151137	0.900717
0.151235	0.900789
0.151333	0.900862
0.151431	0.900934
0.151529	0.901007
0.151627	0.901079
0.151725	0.901152
0.151823	0.901224
0.151921	0.901296
0.152019	0.901368
0.152117	0.90144
0.152215	0.901512
0.152313	0.901584
0.152411	0.901656
0.152509	0.901728
0.152607	0.9018
0.152705	0.901872
0.152803	0.901944
0.152901	0.902015
0.152999	0.902087
0.153097	0.902159
0.153195	0.90223
0.153293	0.902302
0.153391	0.902373
0.153489	0.902444
0.153587	0.902516
0.153685	0.902587
0.153783	0.902658
0.153881	0.902729
0.153979	0.9028
0.154077	0.902871
0.154175	0.902942
0.154273	0.903013
0.154371	0.903084
0.154469	0.903155
0.154567	0.903225
0.154665	0.903296
0.154763	0.903367
0.154861	0.903437
0.154959	0.903508
0.155058	0.903578
0.155156	0.903649
0.155254	0.903719
0.155352	0.903789
0.15545	0.90386
0.155548	0.90393
0.155646	0.904
0.155744	0.90407
0.155842	0.90414
0.15594	0.90421
0.156038	0.90428
0.156136	0.90435
0.156234	0.90442
0.156332	0.90449
0.15643	0.904559
0.156528	0.904629
0.156626	0.904699
0.156724	0.904768
0.156822	0.904838
0.15692	0.904907
0.157018	0.904977
0.157116	0.905046
0.157214	0.905115
0.157312	0.905185
0.15741	0.905254
0.157508	0.905323
0.157606	0.905392
0.157704	0.905461
0.157802	0.90553
0.1579	0.905599
0.157998	0.905668
0.158096	0.905737
0.158194	0.905805
0.158292	0.905874
0.15839	0.905943
0.158488	0.906012
0.158586	0.90608
0.158684	0.906149
0.158782	0.906217
0.15888	0.906285
0.158978	0.906354
0.159076	0.906422
0.159174	0.90649
0.159272	0.906559
0.15937	0.906627
0.159468	0.906695
0.159566	0.906763
0.159664	0.906831
0.159762	0.906899
0.15986	0.906967
0.159958	0.907035
0.160056	0.907102
0.160154	0.90717
0.160252	0.907238
0.16035	0.907306
0.160448	0.907373
0.160546	0.907441
0.160644	0.907508
0.160742	0.907576
0.16084	0.907643
0.160938	0.90771
0.161036	0.907778
0.161134	0.907845
0.161232	0.907912
0.16133	0.907979
0.161428	0.908046
0.161526	0.908113
0.161624	0.90818
0.161722	0.908247
0.16182	0.908314
0.161918	0.908381
0.162016	0.908448
0.162114	0.908514
0.162212	0.908581
0.16231	0.908648
0.162408	0.908714
0.162506	0.908781
0.162604	0.908847
0.162702	0.908914
0.1628	0.90898
0.162898	0.909047
0.162996	0.909113
0.163094	0.909179
0.163192	0.909245
0.16329	0.909311
0.163388	0.909377
0.163486	0.909444
0.163584	0.909509
0.163682	0.909575
0.16378	0.909641
0.163878	0.909707
0.163976	0.909773
0.164074	0.909839
0.164172	0.909904
0.16427	0.90997
0.164368	0.910036
0.164466	0.910101
0.164564	0.910167
0.164662	0.910232
0.16476	0.910298
0.164858	0.910363
0.164956	0.910428
0.165055	0.910493
0.165153	0.910559
0.165251	0.910624
0.165349	0.910689
0.165447	0.910754
0.165545	0.910819
0.165643	0.910884
0.165741	0.910949
0.165839	0.911014
0.165937	0.911078
0.166035	0.911143
0.166133	0.911208
0.166231	0.911273
0.166329	0.911337
0.166427	0.911402
0.166525	0.911466
0.166623	0.911531
0.166721	0.911595
0.166819	0.91166
0.166917	0.911724
0.167015	0.911788
0.167113	0.911853
0.167211	0.911917
0.167309	0.911981
0.167407	0.912045
0.167505	0.912109
0.167603	0.912173
0.167701	0.912237
0.167799	0.912301
0.167897	0.912365
0.167995	0.912429
0.168093	0.912492
0.168191	0.912556
0.168289	0.91262
0.168387	0.912683
0.168485	0.912747
0.168583	0.91281
0.168681	0.912874
0.168779	0.912937
0.168877	0.913001
0.168975	0.913064
0.169073	0.913127
0.169171	0.913191
0.169269	0.913254
0.169367	0.913317
0.169465	0.91338
0.169563	0.913443
0.169661	0.913506
0.169759	0.913569
0.169857	0.913632
0.169955	0.913695
0.170053	0.913758
0.170151	0.91382
0.170249	0.913883
0.170347	0.913946
0.170445	0.914008
0.170543	0.914071
0.170641	0.914134
0.170739	0.914196
0.170837	0.914259
0.170935	0.914321
0.171033	0.914383
0.171131	0.914446
0.171229	0.914508
0.171327	0.91457
0.171425	0.914632
0.171523	0.914694
0.171621	0.914756
0.171719	0.914819
0.171817	0.914881
0.171915	0.914942
0.172013	0.915004
0.172111	0.915066
0.172209	0.915128
0.172307	0.91519
0.172405	0.915251
0.172503	0.915313
0.172601	0.915375
0.172699	0.915436
0.172797	0.915498
0.172895	0.915559
0.172993	0.915621
0.173091	0.915682
0.173189	0.915744
0.173287	0.915805
0.173385	0.915866
0.173483	0.915927
0.173581	0.915989
0.173679	0.91605
0.173777	0.916111
0.173875	0.916172
0.173973	0.916233
0.174071	0.916294
0.174169	0.916355
0.174267	0.916415
0.174365	0.916476
0.174463	0.916537
0.174561	0.916598
0.174659	0.916658
0.174757	0.916719
0.174855	0.91678
0.174953	0.91684
0.175052	0.916901
0.17515	0.916961
0.175248	0.917022
0.175346	0.917082
0.175444	0.917142
0.175542	0.917203
0.17564	0.917263
0.175738	0.917323
0.175836	0.917383
0.175934	0.917443
0.176032	0.917503
0.17613	0.917563
0.176228	0.917623
0.176326	0.917683
0.176424	0.917743
0.176522	0.917803
0.17662	0.917863
0.176718	0.917922
0.176816	0.917982
0.176914	0.918042
0.177012	0.918101
0.17711	0.918161
0.177208	0.918221
0.177306	0.91828
0.177404	0.918339
0.177502	0.918399
0.1776	0.918458
0.177698	0.918518
0.177796	0.918577
0.177894	0.918636
0.177992	0.918695
0.17809	0.918754
0.178188	0.918813
0.178286	0.918872
0.178384	0.918931
0.178482	0.91899
0.17858	0.919049
0.178678	0.919108
0.178776	0.919167
0.178874	0.919226
0.178972	0.919285
0.17907	0.919343
0.179168	0.919402
0.179266	0.919461
0.179364	0.919519
0.179462	0.919578
0.17956	0.919636
0.179658	0.919695
0.179756	0.919753
0.179854	0.919811
0.179952	0.91987
0.18005	0.919928
0.180148	0.919986
0.180246	0.920044
0.180344	0.920102
0.180442	0.920161
0.18054	0.920219
0.180638	0.920277
0.180736	0.920335
0.180834	0.920393
0.180932	0.92045
0.18103	0.920508
0.181128	0.920566
0.181226	0.920624
0.181324	0.920682
0.181422	0.920739
0.18152	0.920797
0.181618	0.920855
0.181716	0.920912
0.181814	0.92097
0.181912	0.921027
0.18201	0.921084
0.182108	0.921142
0.182206	0.921199
0.182304	0.921256
0.182402	0.921314
0.1825	0.921371
0.182598	0.921428
0.182696	0.921485
0.182794	0.921542
0.182892	0.921599
0.18299	0.921656
0.183088	0.921713
0.183186	0.92177
0.183284	0.921827
0.183382	0.921884
0.18348	0.921941
0.183578	0.921998
0.183676	0.922054
0.183774	0.922111
0.183872	0.922168
0.18397	0.922224
0.184068	0.922281
0.184166	0.922337
0.184264	0.922394
0.184362	0.92245
0.18446	0.922506
0.184558	0.922563
0.184656	0.922619
0.184754	0.922675
0.184852	0.922732
0.18495	0.922788
0.185049	0.922844
0.185147	0.9229
0.185245	0.922956
0.185343	0.923012
0.185441	0.923068
0.185539	0.923124
0.185637	0.92318
0.185735	0.923236
0.185833	0.923292
0.185931	0.923347
0.186029	0.923403
0.186127	0.923459
0.186225	0.923514
0.186323	0.92357
0.186421	0.923626
0.186519	0.923681
0.186617	0.923737
0.186715	0.923792
0.186813	0.923847
0.186911	0.923903
0.187009	0.923958
0.187107	0.924013
0.187205	0.924069
0.187303	0.924124
0.187401	0.924179
0.187499	0.924234
0.187597	0.924289
0.187695	0.924344
0.187793	0.924399
0.187891	0.924454
0.187989	0.924509
0.188087	0.924564
0.188185	0.924619
0.188283	0.924674
0.188381	0.924728
0.188479	0.924783
0.188577	0.924838
0.188675	0.924892
0.188773	0.924947
0.188871	0.925002
0.188969	0.925056
0.189067	0.925111
0.189165	0.925165
0.189263	0.925219
0.189361	0.925274
0.189459	0.925328
0.189557	0.925382
0.189655	0.925437
0.189753	0.925491
0.189851	0.925545
0.189949	0.925599
0.190047	0.925653
0.190145	0.925707
0.190243	0.925761
0.190341	0.925815
0.190439	0.925869
0.190537	0.925923
0.190635	0.925977
0.190733	0.926031
0.190831	0.926084
0.190929	0.926138
0.191027	0.926192
0.191125	0.926245
0.191223	0.926299
0.191321	0.926353
0.191419	0.926406
0.191517	0.92646
0.191615	0.926513
0.191713	0.926567
0.191811	0.92662
0.191909	0.926673
0.192007	0.926727
0.192105	0.92678
0.192203	0.926833
0.192301	0.926886
0.192399	0.926939
0.192497	0.926993
0.192595	0.927046
0.192693	0.927099
0.192791	0.927152
0.192889	0.927205
0.192987	0.927257
0.193085	0.92731
0.193183	0.927363
0.193281	0.927416
0.193379	0.927469
0.193477	0.927521
0.193575	0.927574
0.193673	0.927627
0.193771	0.927679
0.193869	0.927732
0.193967	0.927784
0.194065	0.927837
0.194163	0.927889
0.194261	0.927942
0.194359	0.927994
0.194457	0.928047
0.194555	0.928099
0.194653	0.928151
0.194751	0.928203
0.194849	0.928256
0.194947	0.928308
0.195046	0.92836
0.195144	0.928412
0.195242	0.928464
0.19534	0.928516
0.195438	0.928568
0.195536	0.92862
0.195634	0.928672
0.195732	0.928723
0.19583	0.928775
0.195928	0.928827
0.196026	0.928879
0.196124	0.92893
0.196222	0.928982
0.19632	0.929034
0.196418	0.929085
0.196516	0.929137
0.196614	0.929188
0.196712	0.92924
0.19681	0.929291
0.196908	0.929343
0.197006	0.929394
0.197104	0.929445
0.197202	0.929497
0.1973	0.929548
0.197398	0.929599
0.197496	0.92965
0.197594	0.929701
0.197692	0.929753
0.19779	0.929804
0.197888	0.929855
0.197986	0.929906
0.198084	0.929957
0.198182	0.930007
0.19828	0.930058
0.198378	0.930109
0.198476	0.93016
0.198574	0.930211
0.198672	0.930261
0.19877	0.930312
0.198868	0.930363
0.198966	0.930413
0.199064	0.930464
0.199162	0.930514
0.19926	0.930565
0.199358	0.930615
0.199456	0.930666
0.199554	0.930716
0.199652	0.930767
0.19975	0.930817
0.199848	0.930867
0.199946	0.930917
0.200044	0.930968
0.200142	0.931018
0.20024	0.931068
0.200338	0.931118
0.200436	0.931168
0.200534	0.931218
0.200632	0.931268
0.20073	0.931318
0.200828	0.931368
0.200926	0.931418
0.201024	0.931468
0.201122	0.931518
0.20122	0.931567
0.201318	0.931617
0.201416	0.931667
0.201514	0.931717
0.201612	0.931766
0.20171	0.931816
0.201808	0.931865
0.201906	0.931915
0.202004	0.931964
0.202102	0.932014
0.2022	0.932063
0.202298	0.932113
0.202396	0.932162
0.202494	0.932211
0.202592	0.93226
0.20269	0.93231
0.202788	0.932359
0.202886	0.932408
0.202984	0.932457
0.203082	0.932506
0.20318	0.932555
0.203278	0.932604
0.203376	0.932653
0.203474	0.932702
0.203572	0.932751
0.20367	0.9328
0.203768	0.932849
0.203866	0.932898
0.203964	0.932946
0.204062	0.932995
0.20416	0.933044
0.204258	0.933093
0.204356	0.933141
0.204454	0.93319
0.204552	0.933238
0.20465	0.933287
0.204748	0.933335
0.204846	0.933384
0.204944	0.933432
0.205043	0.933481
0.205141	0.933529
0.205239	0.933577
0.205337	0.933626
0.205435	0.933674
0.205533	0.933722
0.205631	0.93377
0.205729	0.933818
0.205827	0.933866
0.205925	0.933915
0.206023	0.933963
0.206121	0.934011
0.206219	0.934059
0.206317	0.934106
0.206415	0.934154
0.206513	0.934202
0.206611	0.93425
0.206709	0.934298
0.206807	0.934346
0.206905	0.934393
0.207003	0.934441
0.207101	0.934489
0.207199	0.934536
0.207297	0.934584
0.207395	0.934631
0.207493	0.934679
0.207591	0.934726
0.207689	0.934774
0.207787	0.934821
0.207885	0.934869
0.207983	0.934916
0.208081	0.934963
0.208179	0.93501
0.208277	0.935058
0.208375	0.935105
0.208473	0.935152
0.208571	0.935199
0.208669	0.935246
0.208767	0.935293
0.208865	0.93534
0.208963	0.935387
0.209061	0.935434
0.209159	0.935481
0.209257	0.935528
0.209355	0.935575
0.209453	0.935622
0.209551	0.935669
0.209649	0.935715
0.209747	0.935762
0.209845	0.935809
0.209943	0.935856
0.210041	0.935902
0.210139	0.935949
0.210237	0.935995
0.210335	0.936042
0.210433	0.936088
0.210531	0.936135
0.210629	0.936181
0.210727	0.936228
0.210825	0.936274
0.210923	0.93632
0.211021	0.936367
0.211119	0.936413
0.211217	0.936459
0.211315	0.936505
0.211413	0.936551
0.211511	0.936597
0.211609	0.936644
0.211707	0.93669
0.211805	0.936736
0.211903	0.936782
0.212001	0.936828
0.212099	0.936873
0.212197	0.936919
0.212295	0.936965
0.212393	0.937011
0.212491	0.937057
0.212589	0.937103
0.212687	0.937148
0.212785	0.937194
0.212883	0.93724
0.212981	0.937285
0.213079	0.937331
0.213177	0.937376
0.213275	0.937422
0.213373	0.937467
0.213471	0.937513
0.213569	0.937558
0.213667	0.937604
0.213765	0.937649
0.213863	0.937694
0.213961	0.93774
0.214059	0.937785
0.214157	0.93783
0.214255	0.937875
0.214353	0.93792
0.214451	0.937966
0.214549	0.938011
0.214647	0.938056
0.214745	0.938101
0.214843	0.938146
0.214941	0.938191
0.21504	0.938236
0.215138	0.93828
0.215236	0.938325
0.215334	0.93837
0.215432	0.938415
0.21553	0.93846
0.215628	0.938504
0.215726	0.938549
0.215824	0.938594
[truncated: 8,001 more rows]
