# Supplementary material for: Myosin with hypertrophic cardiac mutation R712L has a decreased working stroke which is rescued by omecamtiv mecarbil
Source: eLife journal article supplement (doi:10.7554/elife.63691), 2021-02-19
Supplement: fig4-data1 [file Fig4A Source Data.xlsx]

## Sheet: WT
[OM]	WT-mean	WT-SD
0	1.195	0.18
0.21	0.233	0.158
0.42	0.225	0.097
0.84	0.112	0.061
1.25	0.082	0.048
2.5	0.071	0.068
4.17	0.048	0.058
6.25	0.055	0.098
12.5	0.059	0.05
50	0.045	0.049
100	0.036	0

## Sheet: R712L
[OM]	R712L-mean	R712L-SD
0.07	0.293	0.105
2.5	0.29	0.17
4.17	0.335	0.185
6.25	0.382	0.196
10	0.41	0.27
12.5	0.437	0.175
25	0.753	0.239
50	0.798	0.191
100	0.873	0.15
