# Supplementary material for: Myosin with hypertrophic cardiac mutation R712L has a decreased working stroke which is rescued by omecamtiv mecarbil
Source: eLife journal article supplement (doi:10.7554/elife.63691), 2021-02-19
Supplement: fig4-data1 [file Fig4C Source Data.xlsx]

## Sheet: Forward Ensembles
**Timescale = 0.4 ms
WT	R712L + 50 μM OM	R712L + 200 μM OM	R712L
0.375599	0.0766459	0.225042	-0.101721
0.0409248	0.0152563	-0.0516777	0.0593391
0.111193	0.0649362	0.0804574	0.0254851
0.621012	-0.057653	0.218434	0.401126
0.24331	-0.0480917	0.177196	-0.0373044
0.360149	0.728983	0.353843	-0.0954955
0.492662	0.160277	-0.18125	-0.0240684
0.111029	0.203849	-0.299806	0.0558376
0.0801393	0.0978362	0.234599	-0.0507243
0.601505	0.256134	0.169547	-0.132243
0.608895	0.764144	0.265696	0.139939
0.271683	0.305442	0.28299	0.0612991
0.471016	0.400694	0.143641	0.508703
0.536027	0.128279	0.162242	0.613289
0.356401	0.0287874	0.125486	0.48429
0.543537	0.330755	0.228543	-0.111679
0.590852	0.223143	0.043053	0.293437
0.604907	-0.00575965	0.223478	0.530091
0.355091	0.0701546	0.294708	0.0109624
0.538365	0.298155	0.316969	0.550227
0.597203	0.222864	0.509652	0.384134
0.467436	0.237213	0.349513	0.233952
0.150595	0.0205475	0.149667	0.196463
0.611094	0.296769	0.126574	0.429819
0.398615	0.120083	0.106204	-0.18089
0.148034	0.416536	0.318325	0.106381
0.0343799	0.121847	0.202464	-0.23546
0.00253843	0.158032	0.0227021	0.182795
0.461059	0.241125	0.205525	0.161498
0.610901	0.209472	0.241256	0.0675806
0.508359	-0.00299884	0.0050721	0.474256
0.586633	0.29088	0.0434955	0.551004
0.527598	0.195887	-0.16556	-0.0397399
0.237147	0.353234	0.039161	0.0899835
0.764577	0.553519	0.0421267	0.394218
0.549732	0.284448	0.147406	0.0350727
0.55742	-0.114893	0.20734	-0.178653
0.579249	0.0167754	0.0094605	0.50634
0.438604	0.0130848	0.183113	0.311173
0.910022	-0.0997493	0.0599157	0.496012
1.00061	0.0700103	-0.0673297	-0.0974397
0.72702	0.0782237	0.182458	0.236351
0.669022	0.230527	-0.0209378	-0.125307
0.579652	0.39948	-0.119246	0.0145725
1.00333	0.331265	0.0731685	0.228748
0.957945	0.536715	0.374125	-0.32761
0.519143	0.555052	0.378709	-0.133389
0.339681	0.386689	0.257652	0.019648
0.71228	0.273255	0.180308	-0.0029218
0.852145	0.432409	-0.0518156	0.256876
0.952879	0.456173	0.207259	0.264998
0.88632	0.431482	0.259327	0.18721
0.795572	0.286848	0.215969	-0.13845
0.787053	0.402993	0.168151	-0.265374
0.562543	0.312094	0.29537	-0.177141
1.06374	0.0208176	0.286156	-0.209719
1.18493	0.131533	0.119101	0.133997
0.809194	0.481704	0.127689	0.463543
0.733758	0.403526	-0.00368825	0.376278
0.303614	0.19831	0.0628535	0.102812
0.484019	0.140388	0.119432	-0.155802
0.429418	-0.0137902	0.126728	0.137417
0.56721	-0.138601	0.157944	0.0178955
0.86417	0.010135	-0.00991496	-0.537359
0.675528	-0.000717592	0.207304	-0.111275
0.707548	0.278532	0.0824231	-0.219735
0.568054	0.40761	0.232938	-0.236122
0.506649	0.278689	-0.146692	0.182641
0.555631	0.549187	-0.114351	-0.152284
0.131788	0.229813	-0.134675	0.194736
-0.115529	0.295967	0.139147	0.0998868
0.350968	0.708178	-0.0564589	0.137065
0.50493	0.340787	0.042634	0.0892998
0.467615	0.532461	0.27262	0.145084
0.416155	0.188713	-0.113433	-0.0284102
0.393623	0.571553	0.114983	-0.663207
0.227212	0.175334	-0.032152	-0.196712
0.456654	0.201356	-0.205788	0.144916
0.601808	0.345348	-0.0736825	0.0684086
0.033747	0.410752	0.125592	0.170519
0.37098	0.15387	0.270182	0.252472
0.774234	-0.227845	0.208378	0.314106
0.686841	0.398275	0.274335	0.304718
0.483998	0.151336	0.124947	-0.0847739
0.214238	0.345304	-0.00251558	0.179468
0.257621	0.0249067	0.175135	0.462712
0.388981	0.0618448	-0.0186267	0.172574
0.251516	0.271744	0.140882	-0.220995
-0.0790525	0.170954	0.49836	-0.323669
-0.282336	0.155235	0.258538	-0.03548
-0.13276	0.339863	0.224993	-0.196637
0.069764	0.593407	0.0350975	-0.0602279
0.0537165	0.480003	0.171529	-0.0719729
0.22811	0.401039	0.383167	0.0395654
0.59416	0.317208	0.348046	-0.0851916
0.0910071	-0.0892103	0.180448	-0.0314663
0.388899	0.445458	0.0275001	0.349627
0.332306	0.844047	0.243832	0.188692
0.305264	0.485128	0.18788	-0.23221
0.130148	0.504244	0.164868	-0.481903
0.265106	0.174343	0.418027	0.165907
0.444757	-0.0222576	0.366133	0.0830293
0.0769272	0.132544	0.186273	0.176363
0.301051	0.317333	0.134127	-0.0796572
0.36396	0.824621	0.15035	0.171466
0.280351	0.736478	0.306672	0.400314
0.261718	0.202146	0.323033	0.374063
0.414723	0.298897	0.33288	-0.0325462
0.718983	0.0537734	0.305548	0.169058
0.589791	-0.0919064	0.224385	0.361383
0.922495	0.267578	0.240892	0.204128
0.657886	0.379	0.238985	0.249412
0.537974	0.458761	0.567993	-0.461264
0.831587	0.413735	0.557211	0.0796604
0.48737	0.272063	0.305253	0.233752
0.580849	0.356638	0.102163	-0.0958681
0.410443	0.00197893	0.0262098	0.230418
-0.00259386	0.41271	0.187511	0.122574
0.213406	0.418521	0.0771103	0.0848415
1.02845	-0.0666653	0.0993945	0.287
0.299541	0.113424	0.327672	0.206797
0.334692	0.11494	0.469881	-0.067584
0.560189	0.0219114	0.49888	0.151421
0.665786	0.510565	0.205652	-0.324418
0.608664	0.587231	0.559708	0.245984
0.43528	0.470518	0.251944	0.186036
0.565857	0.798673	0.113556	0.184109
0.752057	0.609946	0.155647	0.431239
0.138429	0.639358	-0.0201438	-0.083695
0.281753	0.530002	-0.090327	0.0904151
0.495693	0.245489	-0.0543627	-0.155263
0.775816	0.404086	0.238259	0.0828595
0.304424	0.415805	0.255978	0.524586
0.43362	0.46997	0.26598	0.391276
0.46676	0.312746	0.673564	0.0189388
0.360307	0.0269382	0.298191	-0.254655
0.300094	-0.0466071	0.0865808	0.276003
0.432912	0.152781	0.225709	-0.0480708
0.359484	0.403318	0.176081	-0.326773
0.331095	0.490523	0.213728	-0.194349
0.4193	0.208356	0.257382	-0.241036
0.742165	0.397429	0.138938	-0.102497
0.333439	0.241811	0.180186	-0.00777141
0.0920106	0.130605	0.350816	-0.0424117
0.253332	0.297034	0.223307	0.0914905
0.670815	0.185095	0.0185076	-0.267822
0.313433	-0.0479829	0.277807	-0.458021
0.354206	0.285259	0.235461	0.225075
0.705985	0.850279	0.300829	0.203679
0.58673	0.069716	0.155483	0.141481
0.348372	0.189188	0.0679587	-0.109238
0.525629	0.311144	0.261871	-0.188984
0.268788	0.181214	0.143068	0.402878
-0.110065	0.41359	0.0668389	0.200086
0.335794	0.33969	0.100944	-0.0680926
1.02737	0.263858	0.104968	0.437172
0.60624	0.223467	-0.0410867	0.31622
0.569703	0.523544	0.237538	0.362145
0.832997	0.396702	0.333166	0.479468
0.534906	0.508582	0.301481	0.152587
0.322783	0.219556	0.331942	0.373094
0.758809	0.0337826	0.0120456	0.191776
0.463646	-0.0884039	-0.0062489	-0.0282867
0.794482	0.253817	0.196211	-0.0704995
0.66098	0.390217	0.574101	0.0389961
0.662079	0.44946	0.468941	0.237297
0.599732	0.0926692	0.26084	0.354644
1.10937	0.58689	0.098366	0.538106
0.430304	0.606074	0.353987	0.20815
0.16541	0.129188	0.355887	-0.0795654
0.702605	0.349646	0.196752	0.0841886
0.639086	-0.0409502	0.197252	-0.0317164
0.791253	0.175543	0.414719	0.309174
0.342144	0.139285	0.32276	0.359093
0.412839	0.11891	0.486938	0.0703797
0.710072	0.16452	0.242708	0.11888
0.747211	0.220487	0.256438	-0.147219
0.201052	0.569578	0.380636	0.104334
0.343021	0.120132	0.480162	-0.473139
0.518078	0.148334	0.223301	0.0133621
0.722017	0.609984	0.399725	-0.359495
0.587378	0.184097	0.520696	-0.217973
0.84406	-0.0200171	0.226999	-0.074575
0.895713	0.367682	0.345939	-0.320167
0.592811	0.427055	0.458627	-0.100245
0.417797	0.406312	0.312745	0.0135557
0.405409	0.137769	0.293498	-0.098135
0.262616	-0.102938	0.217199	0.0255027
0.655945	0.343257	0.452649	-0.199908
0.535826	0.229422	0.26854	0.125248
0.394779	0.272992	0.0816583	-0.35107
0.694445	0.18637	0.0779534	-0.200681
0.196448	0.167094	0.223476	-0.0724939
0.367125	0.139207	0.389935	-0.124721
0.634905	0.395259	0.154688	-0.219751
0.524604	0.57437	0.363332	-0.302866
0.66942	0.0337145	0.32055	-0.127297
0.367742	0.385794	0.470341	0.194795
0.51921	0.0319613	0.516254	0.54802
0.477609	-0.051787	0.473452	0.261848
0.164392	0.249648	0.328874	0.208219
0.438273	0.0189087	0.295817	-0.03248
0.120446	-0.204683	0.273608	0.423486
0.610528	0.0256049	0.189999	0.444269
0.664417	-0.0243648	0.142272	0.112995
0.625178	0.0719969	0.341111	0.224204
0.485396	0.311307	0.112335	-0.0894678
0.441403	0.0854605	0.337146	-0.0726308
0.400677	0.204028	0.241954	0.3655
0.856104	0.664968	0.126602	0.0433074
0.830261	0.524399	-0.000176761	-0.228618
0.29649	0.540035	0.262744	0.0448373
0.255253	0.536122	0.12661	-0.487195
0.872526	0.323979	0.274881	0.0286935
0.632647	0.389626	0.142697	-0.103932
0.488112	0.315965	0.0902021	-0.615814
0.543242	0.42038	0.380048	0.143761
0.670842	0.137211	0.360026	0.154072
0.420765	0.0735926	0.276219	-0.430468
0.88002	0.152733	0.446914	0.120999
0.681532	-0.00860394	0.545113	0.57473
0.411385	-0.0397553	0.101125	0.343673
0.592796	0.194485	0.301218	0.148277
0.631305	0.0780353	0.238988	0.19226
0.713219	0.290723	0.34542	0.321356
0.990566	0.401073	0.608944	0.412548
0.632939	0.287105	0.493897	0.231175
0.798581	0.21723	0.338576	-0.196112
0.264931	0.145883	0.361602	-0.0213097
0.111534	-0.16441	0.48209	-0.127902
0.219111	0.280929	0.674842	0.371111
0.236638	0.367319	0.46957	0.257078
0.317326	0.278912	0.316356	0.0514695
0.823416	0.24557	0.3379	0.059684
0.61335	0.0120507	0.567297	0.330516
0.768535	0.330662	0.568166	0.123431
0.174633	0.289274	-0.163802	0.297875
0.448688	0.431814	0.0756099	-0.0819672
1.04667	0.358433	0.0905034	0.0660154
0.68219	0.735591	0.322279	0.572046
0.212716	0.147259	0.417241	0.448416
0.439008	-0.200232	0.404157	0.211267
0.341245	0.112784	0.318577	-0.1802
0.889512	0.238494	0.480762	0.14374
0.729436	0.24268	0.59055	-0.241054
0.197471	0.340355	0.3254	0.269883
0.675517	0.0744396	0.670046	0.170802
0.750188	0.136861	0.449501	0.0921129
0.417625	-0.01372	0.48899	0.113166
0.641051	-0.278216	0.406117	-0.147249
0.715387	0.0392059	0.560612	-0.0988156
0.458176	0.160911	0.504513	-0.017321
0.509174	-0.0293186	0.334368	-0.0716622
0.410734	0.477319	0.592944	-0.527598
0.53066	0.418546	0.325805	-0.302362
0.82756	0.201047	0.468152	0.148327
0.764414	0.313745	0.518087	0.275292
0.765988	0.250243	0.438664	-0.0318373
0.759876	-0.0574391	0.608586	-0.0878702
0.72042	0.0428136	0.356191	0.207396
0.837717	0.324197	0.552046	0.0683042
0.564246	0.179591	0.404749	0.665894
0.362369	0.462652	0.16394	0.109822
0.185259	0.211624	0.418533	0.127556
0.727171	0.158956	0.680695	-0.201975
0.630544	0.359205	0.613746	0.0322692
0.871443	0.245403	0.72698	0.238269
0.422454	0.240301	0.6798	0.384809
0.560773	0.221067	0.380752	0.0907355
0.134141	0.312694	0.474818	0.29683
0.655122	0.354346	0.142441	0.409954
0.326497	0.118012	0.476157	0.282555
0.330231	0.135532	0.440069	0.379078
0.590716	0.329086	0.387051	-0.188189
0.586016	0.272431	0.416139	0.177024
0.678854	0.407731	0.294502	0.116436
0.402788	0.273251	0.267366	-0.397595
0.421844	0.255288	0.205324	-0.310797
0.666351	0.214486	0.265616	0.0918757
0.637116	0.00405121	0.21871	0.128536
0.280047	-0.277137	0.142306	0.0806156
0.313321	0.0438992	0.100566	1.02957
0.681383	0.411761	0.313698	0.41812
0.423399	0.309441	0.181232	0.0479006
0.271421	0.0727151	0.00416872	0.273096
0.142958	-0.0153887	-0.0256311	0.0450239
0.644189	-0.0210518	0.340028	-0.0814136
0.627611	0.218405	0.111204	0.356522
0.599451	-0.0807641	0.509753	-0.0502101
0.509317	0.0646982	0.174486	0.46106
0.485833	0.14524	0.265265	-0.0491277
0.26764	-0.00843462	0.246177	-0.195665
0.159257	0.234108	0.17974	-0.0426373
0.539693	-0.0184069	-0.0627715	0.00550803
0.791713	0.294813	0.0303624	-0.0721371
0.196261	0.581189	0.288965	0.176017
-0.0515033	0.368598	-0.0601472	0.561032
0.282784	0.282618	-0.18036	-0.039758
0.324959	0.399841	0.132106	-0.234862
-0.00416064	0.262369	0.351373	-0.345859
0.433127	0.593572	0.381682	-0.0849887
0.218263	0.384442	0.345291	-0.394767
0.407193	0.513082	0.26993	0.221962
0.171898	-0.00703729	0.546629	-0.345403
0.314172	0.291056	0.473842	-0.0534165
0.292241	0.613095	0.544221	0.171444
0.551795	0.538384	0.608191	-0.165125
0.383052	0.35021	0.493638	0.369018
0.461557	0.748206	0.202972	0.23911
0.482082	0.370917	0.280378	0.184038
0.22233	-0.030599	0.458743	0.326844
0.605482	0.000786359	0.278549	-0.228683
0.725765	-0.214568	0.352375	-0.315889
0.240851	-0.0690292	0.302594	0.184113
0.286028	0.065722	0.367748	-0.0905524
0.434156	0.0408698	0.0807875	0.185027
0.387635	0.37575	0.347957	0.648449
0.502997	0.50942	0.390428	0.125272
0.602673	0.210373	0.167539	-0.307196
0.58873	0.140688	0.152409	-0.285583
0.470361	0.117212	0.515597	0.315043
-0.0806657	0.107039	0.263377	0.497791
0.134136	0.0846903	0.261597	0.202622
-0.0357528	0.0898555	0.433004	0.264963
0.382935	0.377271	0.44276	0.280314
0.426256	0.0827694	0.704733	0.0552346
0.100292	0.273361	0.287408	-0.247894
0.0958293	-0.0734444	-0.0430705	-0.0594348
0.230381	0.138067	0.293451	0.153043
0.0624915	0.385164	0.181682	-0.0566974
0.56356	0.620897	0.0242354	-0.120073
0.337234	0.0725091	-0.00369639	0.532829
0.264672	0.439145	0.309951	0.270645
0.253572	0.567237	0.174762	0.452538
0.230849	0.15602	0.32886	-0.15894
0.747243	0.168585	0.356441	-0.0473043
1.00026	0.213029	0.272299	0.294344
0.770194	0.146413	0.067561	0.47373
0.625885	-0.0773967	0.322088	0.300479
0.471854	0.00507514	0.496474	0.199658
0.517572	0.115313	0.476861	-0.0115131
0.449079	0.351802	0.296219	0.0866822
0.266653	0.557653	0.0675362	0.0548257
0.468905	0.409584	0.325998	0.130732
0.169064	0.0992993	0.227934	-0.0895034
0.0703191	0.235777	0.143954	-0.672718
0.319902	0.441585	0.297139	-0.139314
0.499662	0.376567	0.140708	0.363236
0.589082	0.331654	0.138537	-0.107535
0.636305	0.33366	0.528231	0.136077
0.669887	0.562892	0.562889	0.392855
0.869372	0.145872	0.281515	0.166923
-0.00902679	0.096651	0.199351	0.144805
0.435168	0.379388	-0.0229702	0.0847626
0.0238787	0.228593	0.250126	0.36934
0.11627	0.204337	0.542675	0.43038
0.301814	0.0687082	0.379358	0.316592
0.022783	0.289641	0.349593	-0.225738
0.0603731	-0.191074	0.257507	-0.033487
0.43805	0.0320214	0.577837	-0.497933
0.43551	0.178705	0.328107	-0.49404
0.331575	0.289695	0.373101	-0.392717
0.66523	0.67316	0.188132	-0.00153184
0.566002	-0.0365946	-0.0180691	0.0291063
0.216982	0.147986	0.214924	0.0423718
0.414159	0.0581656	0.22235	0.0500874
0.806541	-0.0912518	0.0618259	0.0663981
0.505061	0.268286	0.4331	0.0242122
0.598187	0.158778	0.577123	0.166637
0.394336	0.762484	0.503377	-0.0898822
0.704557	0.498804	0.335767	0.226919
0.545359	0.282064	0.278227	0.605343
0.450058	0.304029	0.213727	0.247303
0.613391	0.638048	0.0539797	0.131045
0.297045	0.134856	0.260961	0.222765
-0.121917	0.239769	0.0913403	0.0649881
0.34398	0.241059	0.0813375	0.43015
0.500338	0.181166	-0.0101987	0.505516
0.197969	0.181995	0.291418	0.30599
0.00491019	0.24024	0.145777	-0.12587
0.25105	0.453628	0.2151	0.0231803
0.255528	0.461934	0.102223	0.114633
0.35267	0.54738	0.14411	-0.219384
0.136959	0.197736	0.357532	0.0872097
0.576214	0.0406369	0.0972129	0.0592833
0.909671	0.215192	0.0546379	-0.180729
0.354611	0.406035	0.145761	0.254367
0.356595	0.23696	0.244736	0.307951
0.647399	0.324354	0.201112	0.490848
0.410993	0.433554	-0.0523269	0.129824
0.320567	0.18506	0.292906	0.244137
0.0874003	0.241291	0.0485397	0.456881
0.623984	0.224298	0.328401	0.295446
0.174796	0.00570553	0.305009	0.280835
0.330332	0.409604	0.360982	0.682992
0.357079	0.189549	0.0816889	0.455643
-0.0489694	0.133324	0.172085	0.047831
0.12619	0.525313	0.184759	0.102876
0.359008	0.32688	0.344763	0.455313
0.752253	0.0705532	0.25365	0.597079
0.644546	-0.138105	0.240919	0.000437574
0.241675	0.438162	0.21181	-0.0266237
0.0516474	0.355796	0.180923	0.157791
0.100136	0.477921	0.118051	-0.205504
1.00003	0.523376	0.10409	-0.128149
0.605728	0.336436	0.370917	-0.0272409
0.294755	0.616059	0.0911849	-0.266351
0.464224	0.618188	0.168398	0.0109316
0.438149	0.591335	0.259932	0.0111506
0.361966	0.321148	0.353436	0.186336
0.740337	0.441579	0.126533	0.42106
0.279374	0.355335	0.114551	0.364662
0.047131	0.291303	0.19413	0.228783
-0.0801068	0.417811	-0.0330963	0.223964
0.299347	0.150924	-0.0423605	0.19047
0.406951	0.10479	0.351341	0.291992
0.329649	0.341845	0.550671	-0.103241
0.190223	0.272722	0.458166	0.104068
0.317094	0.361289	0.278873	0.185612
-0.0259239	0.377393	0.144864	0.179049
0.447405	0.431045	0.0524985	0.14137
0.55705	0.357512	0.287369	0.388133
0.36896	0.174398	0.0626978	0.0606455
0.817434	0.254617	0.151503	-0.0978303
0.318846	-0.18598	0.395357	0.0459892
0.231575	0.439976	0.240749	-0.061259
0.392639	0.450846	0.525911	0.352361
0.249764	0.265034	0.185974	-0.101076
0.83464	0.311589	0.0991488	0.194041
0.448617	0.369645	0.170664	-0.00541499
0.291163	0.679891	0.097133	-0.108409
0.584765	0.396354	-0.23035	0.102114
0.324233	0.173923	-0.151686	0.0840417
0.225171	-0.00906646	0.0992071	0.0619931
0.375654	0.181048	0.0955665	0.08851
0.370649	0.129342	0.0817287	0.320917
0.876879	0.547786	0.104613	0.596522
0.25091	0.280592	0.432015	0.269058
0.505209	-0.0354104	0.516357	0.136299
0.608771	0.107355	0.462934	-0.0817531
0.491079	0.189614	0.371136	0.0155122
0.590011	0.512153	0.413892	-0.344963
0.282531	0.443162	0.0700995	-0.119999
0.27628	0.521128	0.120214	0.147519
0.0764836	0.119754	0.229442	-0.0126943
0.196347	0.208846	0.136722	0.160771
0.668245	0.360032	0.260995	0.436129
0.252208	0.0865806	0.0448219	-0.105696
0.571224	0.345186	0.325136	-0.0629092
0.284151	0.0898662	0.51453	0.178146
0.347536	0.425947	0.302659	-0.433709
0.0943844	0.534037	0.344493	-0.0366624
0.319492	0.539562	0.357295	-0.146148
0.147796	0.429923	0.230061	-0.149402
0.466915	0.631747	-0.0875523	-0.0300241
0.596794	0.458511	-0.200746	0.0178482
0.193882	0.0759304	-0.080906	0.0791702
0.0714125	0.239922	0.226542	-0.479516
-0.00876853	0.187381	-0.0268553	-0.208041
0.0614846	0.06622	0.195585	0.263885
0.145982	0.240175	0.203188	-0.109017
0.463193	-0.149226	0.22541	-0.273215
0.368223	-0.162778	0.18163	-0.414847
-0.126328	0.537812	0.2405	0.0355777
-0.0295996	0.499734	0.343366	-0.126282
0.13014	0.104734	0.506138	-0.00750604
0.242785	-0.00500262	0.150417	0.349704
0.273806	0.292087	0.126999	0.566783
0.447063	0.340575	0.257386	0.192223
0.467531	0.452027	0.204582	0.363096
0.398081	0.258418	0.409499	-0.12987
0.0644192	0.392754	0.483537	-0.328531
0.239605	0.548587	0.224099	0.320236
0.287903	0.224394	0.0835159	-0.219482
0.246728	0.38219	0.245068	0.0760892
0.386912	0.587785	0.157987	0.0351579
0.132699	0.214675	-0.162283	-0.00487832
-0.142829	0.372444	0.111845	0.152199
0.289336	0.327082	0.258835	0.317892
0.527758	0.429923	0.242896	-0.0465278
0.460056	0.123533	0.270395	0.101759
0.0595333	0.0771517	0.148509	0.181721
0.659529	0.408935	0.213048	0.407129
0.121205	0.320504	0.166516	0.335124
0.202903	0.234234	0.224052	0.118799
0.244595	0.39431	0.238574	0.113422
0.272158	0.504862	0.529374	-0.372012
0.136527	-0.0173564	0.285198	-0.0697152
-0.0458054	-0.0443816	0.167975	0.262386
0.572909	0.00974455	0.508708	0.0197576
0.2072	0.384262	0.306407	0.172802
0.0277808	0.80336	0.164014	0.0127882
-0.209684	0.609555	-0.130616	-0.142513
0.23632	0.289143	0.280656	-0.100437
0.78652	0.303991	0.0572692	-0.108896
0.387675	0.375123	0.266153	0.212507
0.0171324	0.174206	0.140762	-0.0290531
0.13707	0.13345	0.466334	0.110898
-0.270221	0.334639	0.399249	0.286279
-0.308269	0.386394	0.278059	-0.0873773
0.0791017	0.396029	0.218392	-0.379287
0.242649	0.262449	0.200373	0.165758
0.186295	0.366663	0.26074	-0.0579301
0.045236	0.238855	0.378516	0.0773166
0.341433	0.224961	0.28119	0.240602
0.424213	0.279804	0.0257314	0.139207
-0.13666	0.345473	0.142229	0.143223
0.071903	0.279123	-0.0119198	0.453928
0.272297	0.169434	-0.206672	0.183068
0.08769	0.024842	0.187609	0.037579
0.194373	0.024171	0.0488927	-0.0613265
0.431413	0.313305	0.0963224	-0.419765
0.114476	0.528069	0.337512	-0.164139
-0.0682425	-0.0872545	0.558012	0.234294
0.183846	0.145099	0.29607	0.295119
-0.119138	0.184411	0.263801	0.294669
0.0669235	0.135485	0.300511	0.253278
0.378248	-0.20437	0.212854	0.516539
0.221587	0.152466	0.362142	0.364041
0.497388	0.0314822	0.329265	0.199729
0.0958624	0.0606403	0.264875	-0.313334
0.0973564	0.163209	0.0917749	-0.130305
0.113388	0.498104	0.144793	0.0238974
0.727359	0.66659	0.276714	-0.561075
0.785488	0.44589	0.105218	0.306719
0.325882	-0.00155978	0.138632	0.353473
0.405586	0.0391242	0.248515	0.0292232
-0.106383	0.512307	-0.163863	0.239153
0.149206	0.460255	0.0498741	0.268207
-0.0667371	0.571486	-0.0661526	0.427996
-0.15846	0.527952	0.0658474	0.0865525
0.0917836	0.390057	0.236628	-0.307999
0.551023	0.210746	0.324643	0.348776
-0.0840706	0.329019	0.305899	0.0907288
0.24897	0.205392	0.60455	0.185994
0.170396	0.543935	0.400733	0.189254
-0.0112728	0.327356	0.275037	-0.208837
-0.818845	0.0455717	0.385676	-0.0514091
-0.256791	0.851196	0.196817	0.608066
-0.0664332	0.729745	0.104059	0.395512
0.356646	0.334908	-0.0016396	0.264505
0.418238	0.30886	-0.0915692	0.281486
-0.07705	0.361483	0.179842	0.118164
0.152494	0.113188	0.110341	-0.0557448
0.273413	0.110141	0.406701	0.374826
-0.141762	0.49541	0.572019	0.0529033
-0.348258	0.200782	0.392804	0.257845
-0.167016	0.276939	0.265703	0.447666
0.0135387	0.0271332	0.317003	0.666065
-0.0118624	0.395747	0.505063	0.209906
0.246355	0.336037	0.0161157	0.273482
0.202675	0.377488	0.0848555	0.194866
-0.0993639	0.247799	-0.0805365	0.269416
-0.0639377	0.242186	0.24073	-0.345164
0.279083	0.0689878	0.161451	0.150095
0.522343	0.451102	0.0869188	-0.162745
0.38556	0.634276	0.342771	0.455982
0.254821	0.359565	0.126018	0.378365
0.359766	0.371704	0.124377	0.618941
0.241698	0.0327137	0.0161943	0.469272
0.646552	0.28001	0.218294	0.42325
0.0225974	0.33821	0.341262	-0.0762854
0.157795	0.267966	0.310731	0.091188
-0.158669	0.345579	0.190135	0.394547
0.122549	0.406477	0.0440247	0.514135
0.336254	0.156978	0.139484	0.506775
0.259712	0.214577	0.230601	-0.10018
0.334682	0.105982	0.0136757	0.505995
0.168576	0.123591	0.113646	0.241814
0.458461	0.389183	0.466683	-0.307395
0.277659	0.148436	0.366058	-0.413831
0.716493	0.220143	0.339913	-0.345582
0.0373659	0.479071	0.150952	-0.260593
0.276001	0.371031	0.0614189	0.332349
0.162911	0.136824	0.269001	0.411538
0.10583	0.0225826	0.217818	0.143911
0.550319	-0.371427	0.586285	-0.0826051
0.912739	0.0609158	0.434742	0.146571
-0.348899	0.458818	0.399792	-0.0569577
-0.0283633	0.398465	0.301399	0.0780938
0.243883	-0.0365849	0.234935	0.438016
0.200077	0.21879	0.451155	0.196375
0.380413	0.225611	0.395893	0.101212
0.323956	0.0184513	0.286612	-0.0912325
0.525268	0.324921	0.311742	0.158177
0.481871	0.470891	0.33258	0.382124
-0.0843073	0.252318	0.177553	0.156389
0.00586769	0.47616	0.20319	0.0807367
0.145981	0.220067	0.264953	0.261151
0.646572	0.294237	0.0937287	0.0653916
0.0555549	-0.0565155	0.135048	0.296614
0.277301	0.132485	0.288779	-0.0258134
0.581642	0.112941	0.154778	-0.126681
0.171109	0.279524	0.369178	-0.0343179
0.104718	0.390947	0.305884	0.124402
0.395444	0.21788	0.465159	0.135633
0.312516	0.386258	0.257994	0.339703
0.310571	0.434981	0.0945277	0.391249
0.552245	0.297101	0.225071	0.158256
0.367796	-0.0532074	-0.0679752	0.158127
-0.128942	0.321844	0.156466	-0.208021
0.271724	0.0835226	0.282498	0.156758
0.842152	0.341286	0.244512	0.237802
0.271415	0.118831	0.438502	-0.182042
0.315479	-0.0414063	0.37499	-0.178016
0.26641	0.226451	0.0957658	0.0144469
-0.275168	0.0575581	0.419602	0.310617
0.0573555	0.0296414	0.291607	0.737085
0.214526	-0.0961472	0.222429	0.416079
0.536339	-0.00851466	0.173308	0.199318
0.388609	-0.0644874	0.0599052	0.211231
0.265877	0.390393	0.183763	0.262046
0.48002	0.348287	0.34616	0.197683
0.218541	0.165462	0.234123	-0.0262839
0.190702	0.17053	0.291467	-0.421482
0.656584	-0.00123693	-0.0183336	-0.112496
0.569358	0.141947	0.0713522	0.270635
0.723881	0.333503	0.0888053	-0.249461
0.65929	0.0723616	-0.0141373	0.128742
0.2979	0.523781	0.0533566	0.520233
0.181646	0.359875	-0.0732025	-0.0823239
0.483192	0.292164	0.373023	-0.284384
0.72041	0.438703	0.42846	0.185071
0.325876	0.497766	0.209575	-0.38447
0.331258	0.457464	0.241132	-0.276187
0.0850823	0.37349	-0.00800604	0.152864
0.245957	0.287036	0.289567	-0.225861
0.459306	0.0557097	0.172976	-0.120879
0.36222	0.34802	-0.287991	-0.106516
0.280586	0.290822	0.287938	0.204772
0.190631	0.113142	-0.250063	-0.00205274
-0.100318	0.089938	0.0365151	-0.176298
-0.115099	-0.153783	-0.027048	-0.176887
0.373776	0.307642	-0.019536	-0.161994
0.32978	0.499699	0.0425062	-0.0259261
0.487454	-0.0503819	0.158407	0.347283
0.231274	-0.0686731	0.126689	0.329566
0.0706673	-0.170722	0.275605	0.110013
0.632074	0.29684	0.248888	-0.12736
0.364871	0.0390586	0.193475	-0.155856
0.238522	-0.00847061	0.031994	0.142089
-0.0126263	0.258394	0.215037	0.137421
0.325036	0.189567	0.2676	0.0733882
0.428831	-0.0292097	0.186672	-0.0568487
0.198259	-0.203744	-0.180769	-0.0601604
0.407528	0.174687	-0.0276213	-0.217403
0.312419	0.456721	0.134885	-0.436407
0.690365	0.141693	-0.00897625	0.329885
0.447591	0.220654	-0.0593131	-0.0492868
-0.0474235	0.296828	0.190953	0.193099
0.100222	0.204332	0.16311	0.0965762
0.338177	0.315182	0.0267934	0.120577
0.584713	0.30839	0.0911112	-0.0104063
0.223085	0.0688921	0.539809	-0.156682
0.332625	0.310901	0.239892	-0.232275
0.407362	0.323493	0.0743971	-0.0296336
0.0944294	0.460776	0.323719	0.304766
0.332864	0.328413	0.386297	0.815317
0.75254	0.185011	0.299917	-0.0566433
0.407314	0.33181	0.419136	-0.186976
0.59229	0.548537	0.429153	0.0517156
0.504898	0.437441	0.27012	-0.077977
0.324333	0.183985	0.321975	0.118773
0.416782	0.451892	0.291383	-0.0570943
-0.042792	0.135608	0.280586	0.114187
0.474486	0.0306641	0.311663	0.301015
0.202687	0.528195	0.286329	-0.566667
0.225198	0.294749	0.487418	-0.465355
0.427604	0.195602	0.419297	-0.0239351
0.576852	0.208827	0.0915206	-0.192805
0.759778	0.0543747	0.111223	-0.128285
0.220682	-0.0485534	0.179104	0.157019
0.483126	0.28915	-0.0770457	-0.322818
0.422885	0.277598	0.323702	-0.459249
-0.182402	0.0562262	-0.0858074	-0.0530675
0.44621	-0.000732813	0.0823741	0.138762
0.608944	-0.103869	-0.254237	0.206375
0.09144	-0.0701624	-0.095729	0.242175
0.0204057	0.235244	-0.0712464	0.166999
0.330108	0.307646	0.187652	0.366663
0.290301	0.382522	0.182511	0.400938
0.250195	0.177896	0.0214755	0.370575
0.0256043	0.111312	0.013333	-0.101072
0.426619	0.0687685	0.0846153	0.00924131
0.21539	0.246329	0.317512	-0.0182851
0.335035	0.271479	0.214842	0.217584
0.623962	0.114203	0.370499	0.142074
0.246898	0.386994	0.160999	-0.455248
0.318787	0.526884	0.0882462	-0.399274
0.387335	0.0900161	0.0194487	-0.0299723
0.0737158	-0.219445	0.224023	0.264708
0.323918	0.118151	0.352699	-0.175918
0.376684	0.21213	0.175679	0.11337
0.179496	0.383666	0.164434	-0.138122
0.388199	0.19326	0.131268	0.0725858
0.549758	0.565718	0.0477922	-0.053555
-0.169103	0.225439	0.155403	-0.113999
0.345194	0.00931889	0.231153	0.277126
0.378837	0.130767	0.142782	-0.0959331
0.478223	0.352636	0.102971	0.302614
0.505355	0.372234	0.132366	0.390293
0.602995	0.397103	0.314671	0.160918
0.378725	0.186202	0.376156	-0.195011
0.203895	0.28019	0.216998	0.119173
0.66173	0.338341	0.255068	0.352476
0.167643	0.210785	0.373945	0.264383
0.305856	0.335606	0.116485	-0.00567104
0.588718	-0.0166871	0.113721	0.255943
0.761023	-0.138214	0.267334	0.102044
0.522874	0.142277	0.0539002	-0.0765048
0.151622	0.156534	0.109179	-0.393991
0.429531	0.0869993	0.189878	-0.445356
0.162321	0.36311	0.137399	0.320199
0.322265	0.293768	0.270277	0.141396
0.506899	0.217849	-0.0492058	0.238126
0.165	0.120367	0.0191233	0.251401
0.408978	0.273757	0.0350678	0.349681
-0.0659191	0.147771	0.302367	0.0986674
0.124958	0.0497545	-0.166554	0.296189
0.0666261	0.152091	-0.102008	0.227612
0.0899315	-0.0990936	0.0937168	0.155419
0.101533	0.137438	-0.0524928	-0.135362
0.172415	0.0803391	-0.174063	-0.0720556
0.552025	-0.0148957	-0.0694076	-0.113392
0.611841	0.220744	-0.0178016	0.0160679
0.299941	-0.0340545	0.213871	-0.00993336
0.757296	0.0902566	0.0307665	-0.129041
0.599337	-0.0949375	0.178992	0.0252228
0.349897	0.0615838	0.172114	0.231682
0.390441	-0.102367	0.459453	0.0331254
-0.00290296	-0.313789	0.190641	0.0577169
0.297061	0.0451894	-0.0684813	0.286361
0.279879	0.308258	0.153334	0.032569
0.161931	0.093962	-0.042182	0.269354
0.243399	0.138251	-0.168791	0.0947105
0.12708	0.217073	-0.0176487	-0.0102522
-0.00527341	0.530577	0.153361	0.255631
0.577432	-0.101383	-0.100016	0.114307
0.293173	0.048778	0.0227999	0.00419387
0.677552	0.101017	0.262979	0.590483
0.735305	0.323921	0.17184	0.366629
0.197087	0.401632	0.161882	-0.0230429
0.258026	0.419299	0.347374	0.20377
0.215977	0.235367	0.25811	-0.148462
0.505718	-0.0611596	0.00481912	-0.135582
0.521504	0.264984	0.249224	0.0800207
0.62237	0.10438	0.340427	0.0894357
0.0325543	0.139942	0.191282	0.536251
0.0455469	0.259002	0.460743	0.108405
0.491861	-0.0442742	0.346876	0.0474501
0.5547	0.0903363	0.393058	0.0293374
0.268925	-0.115133	0.174692	0.0785317
-0.0730272	0.0982923	0.154693	0.282023
-0.173263	0.401442	0.128738	0.211567
-0.00439261	0.0638638	0.022991	0.472728
0.189699	-0.0986429	0.243658	0.510435
0.239251	0.299062	0.20129	0.188384
0.0730735	0.280809	0.136089	0.23065
0.084816	0.101412	0.437582	0.341268
0.747962	0.250832	0.338682	0.405679
0.364351	0.0648071	0.127967	0.416015
0.229138	0.0671449	0.241503	-0.0818963
-0.0383828	-0.0167884	0.0470046	0.248656
0.328545	0.309318	0.0616208	-0.0653656
0.083432	0.190426	0.0320928	0.146673
0.120412	0.456453	-0.0384323	0.235987
-0.366821	0.199452	-0.0281092	0.532858
-0.660107	0.230634	0.176456	0.373064
0.000535942	0.0251946	0.00571222	-0.0708797
-0.146582	-0.149841	0.226338	0.479196
0.291817	0.00743261	0.0999878	0.280335
-0.160448	0.210487	0.0587598	0.201399
-0.014925	0.588794	0.34122	0.0724563
-0.322421	0.449957	0.231222	-0.0166133
-0.0732832	0.589449	0.329569	0.300465
0.173691	0.572952	0.29656	-0.0743249
0.0702384	0.494352	0.220344	0.124217
0.205384	-0.0655657	0.39148	0.138959
0.321395	0.106892	0.169628	0.0873802
0.206973	0.478383	0.146175	-0.419931
0.465672	0.670058	0.0397831	0.294281
0.186359	0.456043	0.016331	0.244597
0.0144947	-0.100131	0.266771	0.0634834
0.364733	0.138577	0.272913	0.157157
0.11493	0.319982	0.211082	-0.0417824
-0.108222	0.545124	0.217045	0.178761
-0.148555	0.193436	0.325699	0.0589361
0.42261	0.251543	0.0733179	0.206945
0.293676	0.154615	0.385865	0.224667
-0.136378	0.160224	0.155645	0.282923
-0.140273	-0.189218	0.249521	-0.286751
0.357527	0.189583	0.0859702	-0.492592
0.342711	0.144705	0.234515	-0.347647
-0.400295	0.0339266	0.355412	0.22789
-0.139378	-0.0385132	0.217476	0.381723
0.188101	0.15219	0.153266	0.0539861
0.337782	0.684543	0.0855165	-0.236625
0.704272	0.268557	-0.0390876	0.258557
0.768121	0.17808	0.136385	0.185306
0.269315	-0.0413506	0.163228	0.050852
0.635221	0.16851	0.505452	0.11467
0.187042	0.0978242	0.504861	0.161548
0.09235	0.219425	0.311847	0.416758
0.255921	0.437101	-0.0340271	0.692747
0.455442	0.588776	0.274892	0.377516
0.633244	0.71538	0.0224555	0.14569
0.243516	0.605299	0.352209	0.07448
-0.0148634	0.432841	0.342991	0.248384
0.225679	0.535992	0.0969387	-0.0875777
0.083325	0.18482	0.343664	0.12307
0.451808	0.196493	0.495872	-0.173936
0.213228	-0.0521771	0.413141	0.122337
-0.0102074	0.113447	0.0312504	0.171018
0.715169	0.0991996	0.122003	0.292234
0.289692	0.138362	0.0711852	0.0886395
0.320731	0.142244	-0.0163017	0.187444
0.543877	-0.288289	-0.192384	-0.0779427
0.14048	0.0625863	0.0448289	-0.190763
0.293834	0.433293	0.172147	0.0662759
0.31189	-0.14561	0.21602	-0.2896
0.134143	0.327942	0.0892632	-0.096699
0.144111	0.266112	0.500358	0.167125
0.140266	0.250136	0.470604	-0.0865653
0.770299	0.24221	0.374658	0.100748
0.474536	0.302243	0.063516	0.106537
0.824458	0.0403081	0.182796	-0.358246
0.682237	0.0061559	-0.020146	0.265374
0.377879	-0.0401295	-0.234688	0.293989
0.400779	-0.197647	-0.0317654	0.211715
0.166151	0.0390826	0.0451639	0.272126
0.647981	0.465699	-0.1341	0.104179
0.94923	0.0251542	-0.314714	-0.209206
0.976272	0.258028	-0.0328071	-0.337004
0.0439978	0.542357	0.0924113	-0.218127
-0.000743238	0.270976	0.144777	0.278988
0.474949	0.139658	0.303412	0.518067
0.798615	0.109043	0.332217	-0.106105
0.231649	0.449216	-0.0862033	0.125505
0.679599	0.455537	0.0764797	0.606815
0.342512	0.303328	0.192162	0.374911
0.206971	-0.0329806	0.0801239	0.0367564
0.716513	0.205199	-0.0321209	0.0111085
0.881014	0.363991	0.0253113	-0.0584619
0.460747	0.367126	0.0116092	0.432863
0.26813	0.507336	-0.288176	0.450868
0.184074	0.517033	-0.11148	0.169608
0.194471	0.373512	-0.0376129	0.0954401
0.440492	0.380446	0.153344	0.100333
0.629061	0.451297	0.238309	-0.160915
0.399418	0.493607	-0.0733247	0.273991
0.359062	0.0967819	-0.0355994	0.310577
0.31001	0.487962	0.00440843	0.0313216
-0.0462458	0.343112	0.409567	0.399574
0.659428	0.235342	0.0807723	0.134401
0.427735	0.10095	0.0454754	0.209383
0.299863	-0.201037	0.150572	0.0957781
0.589721	0.0401585	0.200838	0.270975
0.182059	0.289179	0.321088	0.0813629
0.479777	0.122089	0.458337	0.0101898
0.0759074	-0.0238825	0.594851	0.0529365
0.216557	0.173758	0.289198	-0.264604
0.487658	0.559473	0.144296	-0.287095
0.443959	-0.238063	0.202308	0.156533
0.850312	-0.185699	0.192523	-0.0489685
0.614979	-0.0729467	0.55535	0.275305
0.332375	0.126796	0.268343	0.429371
0.256477	-0.0377458	0.034526	-0.131111
0.154134	0.16402	0.0456298	0.464581
0.850774	0.137379	0.401618	0.59545
-0.044978	-0.110282	-0.123295	0.514147
-0.0659072	0.0653121	-0.0943268	0.651552
0.0052497	0.191238	0.128792	-0.146066
0.762708	0.536541	0.0273552	0.108855
0.120719	0.332055	0.218803	0.050497
0.350841	0.147776	0.340006	0.20988
0.640779	0.252802	0.303452	0.190685
-0.419037	0.31121	0.245404	0.143957
0.533082	0.204804	0.249089	-0.189907
0.225346	0.0972543	-0.0210511	0.198746
-0.353772	-0.247615	0.108508	-0.0899337
0.256985	-0.115984	0.32274	0.00103077
0.0973311	0.279273	0.518247	-0.208515
0.290784	0.331359	0.455317	0.0873128
0.15639	0.097814	0.503149	0.196493
0.342149	0.262526	0.209569	-0.0319681
0.297696	0.535832	0.0181784	0.236478
0.635284	0.318333	0.0211601	0.0865343
0.440709	0.278611	0.184955	-0.00631631
0.26499	0.201243	0.056642	0.00227944
0.250657	-0.0179216	0.185055	-0.0167378
0.54274	0.0548379	0.139479	0.147697
0.685574	0.0806245	0.196732	0.413984
0.227825	0.18311	-0.0745643	0.0423766
0.610755	-0.0831651	0.134134	-0.107402
0.205568	-0.0395981	0.222899	-0.146274
0.224861	-0.104107	0.176008	0.0803723
0.070709	-0.0046107	0.16816	0.287238
0.407289	-0.0153228	-0.0205346	0.346421
0.423611	0.0334296	0.028014	0.44323
0.560664	0.445499	-0.0682392	0.423785
0.254979	0.784215	0.0763906	0.301087
0.648814	0.445956	0.257464	-0.165558
0.857118	0.43906	0.296252	-0.390915
0.854515	0.271135	0.360958	-0.468543
0.221181	0.335552	0.121025	0.0372608
0.402068	0.254665	0.121776	-0.142603
0.41063	0.0327628	0.0701097	0.305959
-0.115419	0.0747408	0.0350364	0.224845
-0.11117	-0.133207	0.122652	0.222932
0.538252	-0.135608	0.176009	-0.455519
0.565491	-0.0620818	0.164674	-0.384797
0.285562	0.136445	0.245089	0.37094
0.42434	0.229385	0.0594506	0.0734921
0.283371	0.102254	0.0990036	0.180842
0.52957	-0.068235	-0.14589	-0.137544
0.496167	-0.177195	0.128251	0.27265
0.232892	0.169782	0.114774	0.374903
0.281245	0.328583	-0.0437734	0.0716921
0.731037	0.203967	0.00547836	0.237419
0.661478	0.0588747	-0.0321905	0.451877
0.401059	-0.149806	-0.0188089	0.205746
0.485653	0.0225937	-0.0470561	0.0221214
0.542035	0.0136047	0.143107	-0.0134519
0.696814	-0.0030224	0.145774	0.403703
0.872695	-0.103928	-0.00501476	0.670517
0.734421	0.0611428	0.0744327	-0.0473262
0.384027	0.0332761	0.0800631	-0.267298
0.40439	-0.246632	-0.0205594	0.14037
0.687822	0.142551	-0.330168	0.333565
0.893462	0.0808043	-0.0366868	0.294359
0.630399	-0.300804	0.138088	-0.186131
0.75567	-0.170456	0.385764	0.471083
0.407281	0.00264436	0.0965541	0.209736
0.808668	0.24766	0.0143508	0.0176325
0.614414	0.382163	0.243156	-0.22071
0.115842	0.0521318	-0.0305166	-0.317202
0.470557	0.195962	0.0646693	0.134923
0.325664	0.453583	0.0499611	0.458812
0.281756	0.600633	0.199141	0.209547
0.0597931	0.287366	0.403914	0.324985
0.732946	0.128033	0.0720475	-0.00809016
0.516714	0.287283	0.273825	0.288555
0.334167	0.16149	0.297314	-0.0298713
0.407229	-0.203231	0.125083	0.236504
0.103194	0.120396	0.264711	0.0523197
0.419198	0.281493	0.277583	-0.161345
0.448242	0.0805544	0.0338105	0.367548
0.194258	0.46791	0.209634	-0.0167632
0.493439	0.123061	0.598655	0.173683
0.369851	0.189732	0.248662	0.141982
-0.13969	-0.0946152	0.128878	0.119049
0.150272	-0.202621	0.329424	-0.189753
0.110781	0.0839099	-0.0918649	0.203165
0.244812	-0.321364	0.0252905	-0.0783906
0.372228	-0.101739	0.250653	0.161406
0.985446	0.0302068	-0.00463567	0.183236
0.822901	0.0030899	0.16704	0.238161
0.234	0.117727	0.0788593	0.0227486
0.467045	-0.0637061	0.376198	0.0847515
0.618363	0.436066	0.191518	0.266631
0.257217	0.330317	0.417241	0.0566091
0.595137	-0.0534378	0.287702	-0.0474519
0.753228	-0.115555	0.00338282	0.0140775
0.827441	0.24472	0.229786	0.0992863
1.1418	0.12476	0.44614	0.159999
1.26066	0.238061	0.299294	0.170046
1.45237	0.504781	0.223073	0.0229271
1.33321	0.26792	0.299704	0.36163
1.2231	0.199795	0.323814	0.23021
1.66845	0.2204	0.150243	0.334469
1.15363	0.387926	0.117798	0.56385
0.556707	0.172565	0.0957486	0.183372
1.11057	0.0752737	0.401288	0.28476
1.05167	0.129859	0.447926	0.463793
1.21715	0.0546203	0.18368	0.0205358
0.763333	-0.0637907	0.148658	-0.128207
1.0649	0.0547924	0.285658	-0.0569597
0.972907	0.217162	0.0572266	0.344706
0.99747	0.0328712	0.033708	0.0396962
1.17886	0.203946	0.634217	0.281142
1.19615	0.20585	0.159696	0.6675
0.738418	0.224601	0.416972	-0.0737318
0.838851	0.0834791	0.370189	0.283506
0.849398	-0.137634	0.490353	0.3658
0.970021	-0.0786545	0.309727	0.309113
1.05975	-0.145117	0.212815	0.355259
0.875685	-0.20923	0.276796	0.128237
1.11633	0.152706	0.175216	0.267731
0.986585	0.0388252	0.304096	0.329415
1.16281	-0.250017	0.149551	0.266054
0.303339	0.0239495	0.207978	0.412707
0.844356	0.075523	0.147842	0.211354
1.04714	0.069631	0.0712911	0.609435
1.19306	0.132316	0.168507	0.362791
1.18994	0.225844	0.294078	0.648347
2.00989	0.312697	0.187518	0.774825
2.26822	0.107314	0.445166	0.694885
2.53077	0.23555	0.483802	0.855219
2.33098	0.279394	0.847215	0.398445
2.66055	0.562472	0.91621	0.432498
3.24479	0.554379	1.1819	0.89559
3.19119	0.647001	1.35552	1.00923
3.01511	0.824543	1.52063	1.0058
3.24757	0.853197	1.77363	0.848782
3.23341	0.92345	1.66651	0.493121
3.67013	0.957021	1.65106	0.586131
3.46134	1.17559	1.69759	0.914688
3.40934	1.18594	1.57887	0.64709
3.93995	1.3928	1.84307	0.700535
4.19084	1.36601	2.03819	1.4809
4.04609	1.42639	1.81516	0.996039
3.57823	1.66613	1.98565	0.828431
3.4364	1.66849	2.12229	1.04856
3.57987	1.82457	2.00888	1.03389
3.9661	1.83536	2.2013	0.961265
3.87206	1.75155	2.37654	0.992281
3.80205	1.99747	2.24618	0.96914
3.91276	1.79916	2.23957	0.775939
3.80876	1.69072	2.3617	1.01517
4.09583	1.70575	2.27355	0.909026
4.06426	1.77125	2.1599	0.872004
3.9863	1.69149	2.46204	0.769524
4.11245	1.8991	2.33221	1.07367
4.1382	1.81007	2.362	0.959841
3.81717	1.83748	2.52046	1.12295
4.02605	2.0682	2.51661	1.34325
3.87462	2.10462	2.46266	1.15018
3.95163	2.23989	2.4859	1.58219
3.95784	2.21518	2.48232	1.33198
4.13608	2.18307	2.52705	1.20873
3.96856	2.25193	2.53336	1.21954
4.05297	2.20502	2.47169	1.09751
4.18316	1.91235	2.51563	1.11186
4.07545	2.04867	2.60408	1.25652
4.20065	1.88644	2.59561	1.26686
4.20023	2.10573	2.65983	1.33597
4.14576	2.26118	2.61475	1.36725
4.25768	2.06917	2.64506	1.2962
4.16369	2.04868	2.6485	1.23099
4.01995	2.3554	2.70415	1.38789
4.03308	2.11025	2.54974	0.990766
4.21416	2.01059	2.64692	1.24523
4.38338	2.02657	2.66373	1.32313
4.37779	2.1755	2.61094	1.01567
4.31703	2.17037	2.66116	0.943337
4.42104	2.22127	2.84238	1.01181
4.50915	2.27247	2.81321	1.06997
4.32658	2.23644	2.81703	0.957167
4.15784	2.23074	2.79113	0.88588
4.07079	2.42404	2.81709	0.900866
3.69694	2.42867	2.78412	1.16164
4.02185	2.42311	3.02516	1.12142
3.93958	2.29062	2.91279	1.03772
4.15812	2.25232	2.89249	1.25002
4.10815	2.26538	2.92051	1.14609
4.11989	2.14407	2.91816	0.983701
4.1963	2.3821	2.86006	1.27583
4.38868	2.33579	2.99006	1.01914
4.10398	2.19158	2.81706	1.05787
3.879	2.18972	2.88801	1.26822
3.87103	2.09779	2.92195	1.09543
4.10547	2.27896	2.92976	0.985489
3.98092	2.18255	2.88223	0.894117
3.88831	2.10974	2.87236	0.933631
3.93818	2.2909	2.84457	1.17919
4.00448	2.35379	2.87531	1.2515
3.85068	2.42587	2.85102	1.17627
4.16936	2.39491	2.77669	1.36472
4.32685	2.33577	2.65785	1.26076
4.2363	2.37926	2.86554	1.38935
4.10983	2.33497	2.78385	1.37637
4.12658	2.16505	2.72088	1.12209
4.19746	2.31624	2.75664	1.05618
4.16472	2.35623	2.76769	1.09549
4.25656	2.33291	2.85399	1.02577
4.46269	2.41383	2.95608	1.18712
4.69149	2.41314	3.05105	1.30421
4.46739	2.42593	3.07516	1.25196
4.62538	2.30325	3.02975	1.22388
4.78876	2.28085	3.152	1.34951
4.5853	2.32721	3.03708	1.46529
4.45567	2.35787	3.00938	1.7461
4.44607	2.31829	2.96891	1.48584
4.29058	2.27487	2.98079	1.42323
4.27085	2.30512	2.98337	1.31197
4.55057	2.26565	2.91756	1.18534
4.4972	2.22674	2.96135	1.11369
4.8245	2.20224	2.98509	1.30011
4.56272	2.24999	3.05058	1.18119
4.49628	2.06452	3.14311	1.22862
4.33116	2.35116	3.0584	1.27908
4.45411	2.43174	3.10156	1.19506
4.34731	2.41671	3.18328	1.21441
4.1302	2.58856	2.98653	1.41275
4.2186	2.41732	3.09796	1.37114
4.58938	2.44677	2.97776	1.46447
4.10717	2.43257	2.89665	1.56169
4.15403	2.43756	2.95116	1.46408
4.59321	2.35734	2.89636	1.29489
4.48681	2.34319	2.96135	1.29954
4.44701	2.44446	3.06032	1.27175
4.35176	2.63218	3.12992	1.34012
4.60792	2.61545	3.03439	1.37424
4.37656	2.83305	2.96451	1.31434
4.462	2.7827	3.00508	1.51109
4.31182	2.61109	3.11765	1.44372
4.4693	2.50814	3.07197	1.53683
4.32686	2.58556	3.07027	1.38738
4.27337	2.54227	3.03159	1.51582
4.40752	2.50941	3.06669	1.51728
4.34102	2.37651	3.1251	1.09967
4.31134	2.59935	3.27195	1.34443
4.26831	2.49843	3.29121	1.26973
4.34821	2.53182	3.30896	1.32103
4.40142	2.5449	3.35085	1.1274
4.37541	2.5255	3.30897	1.3138
4.44118	2.63801	3.35719	1.4547
4.47949	2.57693	3.48034	1.43932
4.27483	2.53803	3.49575	1.3543
4.46924	2.44899	3.33611	1.44913
4.51658	2.3871	3.29705	1.48428
4.74901	2.56635	3.32279	1.29693
4.66595	2.63474	3.26777	1.22558
4.59096	2.50325	3.2512	1.39644
4.42113	2.43468	3.20298	1.1237
4.37793	2.46752	3.20304	1.11171
4.65292	2.55073	3.27297	1.28722
4.56288	2.46496	3.22623	1.22468
4.59975	2.54617	3.28636	1.0078
4.67216	2.49461	3.33496	1.17497
4.5571	2.43566	3.21143	1.26258
4.65185	2.44338	3.37096	1.31776
4.6644	2.64841	3.25263	1.28125
4.40493	2.56383	3.31934	1.14388
4.38064	2.72816	3.43462	1.30048
4.3791	2.73373	3.37782	1.27949
4.77601	2.64801	3.38661	1.32884
4.84531	2.63615	3.33864	1.35561
4.55254	2.64004	3.27195	1.44264
4.79829	2.62163	3.30487	1.57723
4.79078	2.44103	3.29147	1.6232
4.31927	2.41473	3.21857	1.57768
4.55628	2.43261	3.26331	1.53617
4.85182	2.4701	3.31828	1.34246
4.66358	2.52491	3.37809	1.33783
4.74415	2.54572	3.39418	1.34048
4.6568	2.57807	3.33442	1.26671
4.55364	2.60227	3.2776	1.42942
4.80182	2.60961	3.36004	1.2719
4.66525	2.54538	3.36385	1.63661
4.73802	2.69569	3.44202	1.46852
4.78779	2.63088	3.43044	1.47201
4.66408	2.51709	3.3613	1.4413
5.04459	2.51017	3.33979	1.47589
4.80475	2.474	3.33562	1.44542
4.69978	2.42242	3.31272	1.29941
4.60778	2.42075	3.22314	1.48572
4.73403	2.43114	3.27286	1.26375
4.56039	2.48992	3.29008	1.18935
4.46693	2.50438	3.27186	1.26184
4.3918	2.48769	3.38678	1.26831
4.41634	2.53498	3.32827	1.10366
4.24285	2.52878	3.28669	1.20533
4.24746	2.65908	3.29971	1.10495
4.32141	2.55197	3.32696	1.34067
4.23572	2.56558	3.34178	1.17477
4.34941	2.67932	3.4514	1.25275
4.43503	2.63075	3.39273	1.17413
4.45498	2.54187	3.35533	1.07318
4.32474	2.56129	3.34783	1.19425
4.40932	2.52216	3.36183	1.17513
4.50539	2.5682	3.39413	1.30092
4.58696	2.57955	3.42166	1.19869
4.52467	2.50129	3.36285	1.16256
4.16971	2.45987	3.23727	1.25659
4.26581	2.52465	3.31564	1.12427
4.54113	2.49309	3.4401	1.39
4.34585	2.36116	3.41622	1.44841
4.1599	2.563	3.43477	1.20091
4.17626	2.54462	3.47424	1.22411
4.49353	2.42267	3.3778	1.33694
4.55942	2.54591	3.31671	1.32113
4.58124	2.56205	3.36761	1.17786
4.80784	2.6357	3.29858	1.1769
4.64634	2.4927	3.32531	1.17518
4.52591	2.49125	3.35954	1.29463
4.61735	2.50228	3.43391	1.21391
4.70182	2.46298	3.4632	1.27967
4.44437	2.55266	3.30678	1.27033
4.2206	2.51152	3.3031	1.44673
4.22216	2.48013	3.3262	1.35075
4.39237	2.45257	3.28238	1.2913
4.4825	2.69552	3.35096	1.34455
4.75705	2.60653	3.33406	1.18232
4.15473	2.56153	3.24839	1.19873
4.23824	2.42711	3.30183	1.14531
4.53835	2.48603	3.28247	1.27425
4.49692	2.50498	3.3448	1.30876
4.72081	2.50763	3.28859	1.22979
4.7062	2.56068	3.39823	1.20886
4.66244	2.53544	3.40946	1.17913
4.29441	2.54948	3.45014	1.16085
4.34504	2.56367	3.39071	1.17248
4.29893	2.61872	3.42191	1.24657
4.47494	2.69181	3.34625	1.29649
4.49193	2.65961	3.34379	1.09653
4.49095	2.46976	3.37136	1.16595
4.57379	2.50391	3.44216	1.41754
4.60934	2.47108	3.40696	1.41914
4.48031	2.47721	3.40441	1.20234
4.46167	2.41958	3.39053	1.41203
4.404	2.54916	3.36637	1.34563
4.55491	2.67369	3.28241	1.23364
4.51482	2.4626	3.24775	1.28237
4.51616	2.4282	3.20012	1.30332
4.45171	2.44252	3.35948	1.28802
4.46475	2.43794	3.3709	1.22866
4.37236	2.46242	3.34073	1.18572
4.40328	2.53708	3.32799	1.13511
4.43468	2.57504	3.34272	1.14602
4.48602	2.50779	3.39352	1.26186
4.18713	2.4666	3.41342	1.23638
4.31586	2.59886	3.35708	1.36264
4.45647	2.63447	3.40105	1.26857
4.59217	2.55601	3.39307	1.21771
4.64699	2.79429	3.35066	1.20919
4.62689	2.70165	3.36852	1.26578
4.55232	2.55258	3.37028	1.2958
4.60799	2.55423	3.43207	1.13464
4.59532	2.56369	3.4927	1.20427
4.67378	2.4815	3.50869	1.19733
4.5259	2.47247	3.42887	1.22828
4.36769	2.58362	3.38338	1.19692
4.30981	2.63855	3.40774	1.38944
4.38078	2.7459	3.44501	1.34236
4.3495	2.71387	3.3049	1.39094
4.26819	2.73575	3.39317	1.40624
4.16768	2.74621	3.35477	1.26449
4.37068	2.71481	3.36116	1.3104
4.27814	2.66366	3.39893	1.25713
4.39163	2.68295	3.41363	1.19751
4.58142	2.64068	3.49319	1.35121
4.33059	2.63549	3.46277	1.42602
4.2701	2.69518	3.46785	1.32976
4.68047	2.69112	3.51323	1.34066
4.61477	2.80427	3.4123	1.365
4.52467	2.72954	3.41735	1.39206
4.46893	2.58484	3.41271	1.38121
4.24284	2.78674	3.31708	1.13646
4.37182	2.69498	3.45724	1.16933
4.48656	2.6726	3.45234	1.16137
4.55099	2.67155	3.42609	1.2525
4.50641	2.64617	3.38934	1.18563
4.22195	2.63952	3.33261	1.09026
4.43925	2.83025	3.3241	1.38826
4.52171	2.89587	3.3289	1.34744
4.43982	2.70353	3.25504	1.23359
4.37095	2.66514	3.33693	1.21823
4.37406	2.60055	3.43522	1.25719
4.33602	2.65652	3.30367	1.2816
4.45478	2.5522	3.28541	1.23135
3.98975	2.56823	3.22542	1.2326
4.22033	2.55185	3.2592	1.24839
4.40813	2.53911	3.21499	1.15482
4.30069	2.60481	3.40845	1.23505
4.32252	2.65669	3.35574	1.26161
4.39442	2.65777	3.40729	1.3746
4.44462	2.75156	3.37431	1.33209
4.45909	2.73426	3.38699	1.31006
4.32178	2.68821	3.42161	1.30361
4.46866	2.71221	3.50133	1.18964
4.52374	2.65685	3.45306	1.23447
4.28398	2.65469	3.39477	1.20971
4.52835	2.47602	3.48358	1.21173
4.49558	2.73047	3.42435	1.16867
4.60971	2.57284	3.35945	1.26422
4.59948	2.61299	3.42761	1.28715
4.37302	2.69765	3.41739	1.30899
4.52095	2.79917	3.53472	1.09876
4.40791	2.79666	3.55299	1.15296
4.38224	2.73183	3.56972	1.29288
4.33576	2.8956	3.58278	1.09312
4.45485	2.91002	3.55581	1.26749
4.26797	2.77822	3.44065	1.28393
4.18723	2.78947	3.47755	1.16053
4.36417	2.89117	3.54226	1.05307
4.39719	2.8766	3.61335	1.19344
4.07659	2.94609	3.51913	1.13094
4.3752	2.88762	3.46239	1.14891
4.31737	2.896	3.49312	1.34512
4.39401	2.86754	3.50833	1.3072
4.50302	2.78328	3.41458	1.18718
4.34756	2.8619	3.38507	1.32093
4.37684	2.72285	3.34104	1.32635
4.35144	2.73897	3.37075	1.35691
4.33899	2.87217	3.48327	1.31517
4.28445	2.81267	3.44039	1.28166
4.38738	2.88878	3.43339	1.13082
4.62325	2.85489	3.35624	1.27038
4.46145	2.86478	3.30708	1.13426
4.32639	2.84453	3.37654	1.13333
4.35585	2.74571	3.43288	1.09992
4.33281	2.78066	3.33604	1.18109
4.38495	2.63455	3.40105	1.18928
4.23201	2.71118	3.39111	1.15815
4.27745	2.78139	3.38652	1.14022
4.41172	2.82299	3.31309	1.1879
4.41271	2.82414	3.36869	1.15682
4.87596	2.78525	3.36381	1.12673
4.52735	2.79863	3.30571	1.14174
4.27029	2.73046	3.41631	1.01353
4.45353	2.7057	3.4584	1.01192
4.33256	2.71072	3.39158	1.08896
4.34626	2.7652	3.42116	1.00324
4.37473	2.7754	3.46156	1.00753
4.39804	2.75694	3.43079	0.918933
4.40848	2.7928	3.4032	1.02301
4.39223	2.73998	3.42951	1.0111
4.44602	2.73607	3.41886	1.15928
4.61345	2.77811	3.36013	1.17788
4.39933	2.82705	3.46421	1.25098
4.39052	2.84637	3.45334	1.16199
4.45229	2.8589	3.47628	1.04021
4.59904	2.82212	3.53183	1.19479
4.47219	2.81157	3.54369	1.22598
4.29843	2.77912	3.69829	1.12159
4.34698	2.78714	3.57544	1.05297
4.4467	2.80189	3.45829	1.04683
4.3062	2.71517	3.4682	1.05702
4.09363	2.7374	3.52017	0.95783
4.06814	2.70082	3.58859	1.0311
4.1531	2.75194	3.61907	1.13806
4.27173	2.80839	3.50988	1.09925
4.32019	2.83743	3.51001	1.0535
4.38172	2.87351	3.60189	1.15074
4.46725	2.87053	3.5955	1.22503
4.41607	2.90779	3.56118	1.26924
4.50315	2.84348	3.55431	1.23264
4.43758	2.83726	3.49194	1.25659
4.19773	2.78873	3.59127	1.2711
4.32223	2.80305	3.55856	1.09712
4.26731	2.85374	3.50694	1.08268
4.26363	2.79342	3.44927	1.06217
4.37913	2.79847	3.52473	1.12058
4.18579	2.76652	3.42491	1.0793
4.23842	2.66094	3.42919	1.15375
4.42576	2.7683	3.41416	1.3023
4.48513	2.7331	3.48274	1.18605
4.46694	2.76706	3.51043	1.20049
4.57331	2.76517	3.59941	1.19762
4.4262	2.72969	3.61334	1.30276
4.62755	2.75111	3.43707	1.24781
4.4568	2.71526	3.53891	1.21284
4.24772	2.85196	3.55045	1.20388
4.14654	2.84594	3.52322	1.19211
4.30385	2.76916	3.33011	1.23185
4.21439	2.79689	3.35002	1.35355
4.28276	2.77118	3.42199	1.21094
4.41716	2.71429	3.38235	1.34407
4.4473	2.78289	3.41463	1.28182
4.50327	2.72817	3.39042	1.28824
4.30069	2.71503	3.42468	1.1237
4.38593	2.72986	3.39317	1.17381
4.34882	2.75284	3.37537	1.19788
4.28097	2.81393	3.47226	1.23021
4.18902	2.78535	3.4947	1.22936
4.11509	2.77298	3.38601	1.1746
4.25547	2.81979	3.49879	1.0889
4.09623	2.81521	3.51929	1.08541
4.3652	2.8664	3.50404	1.0797
4.40101	2.76891	3.47879	1.15044
4.32102	2.67357	3.54341	1.18038
4.36411	2.70033	3.55875	1.0773
4.30135	2.69329	3.50498	1.10229
4.11951	2.66473	3.53898	1.23801
4.26513	2.65018	3.64241	1.175
4.40109	2.78733	3.51061	1.17169
4.28605	2.85128	3.59238	1.11509
4.20802	2.84899	3.56333	1.22323
4.08759	2.78975	3.4751	1.1984
4.23005	2.75784	3.46589	1.1068
4.31976	2.72255	3.38571	0.947096
4.05808	2.64865	3.38015	1.06216
4.07266	2.68525	3.39593	1.08622
4.30671	2.66817	3.41482	1.15942
4.32486	2.68143	3.4831	1.14879
4.37785	2.7087	3.46655	1.03683
4.26015	2.72822	3.41617	1.20793
4.34547	2.66959	3.54826	1.22653
4.44568	2.71634	3.60691	1.18702
4.49028	2.85933	3.5742	1.22468
4.49099	2.86019	3.53576	1.24565
4.50745	2.70612	3.53238	1.26308
4.4019	2.72835	3.47303	1.16858
4.38658	2.73408	3.46521	1.19268
4.38423	2.68295	3.40431	1.14454
4.52069	2.60908	3.51357	1.26423
4.41116	2.59704	3.36539	1.07908
4.30907	2.68228	3.34091	1.06587
4.34752	2.72146	3.40617	1.00055
4.23778	2.64177	3.35338	1.20594
4.38486	2.73113	3.36028	1.14996
4.19943	2.66029	3.4437	1.15589
4.26336	2.6799	3.46478	1.25583
4.27284	2.71156	3.53741	1.16982
4.34859	2.70098	3.53351	1.09912
4.29564	2.6577	3.45584	1.05662
4.16915	2.69684	3.5435	1.24548
4.25375	2.6541	3.52647	1.25878
4.25085	2.73987	3.45577	1.18985
4.20765	2.8248	3.42377	1.31022
4.19458	2.81147	3.45396	1.19626
4.23605	2.83938	3.47255	1.16014
4.20742	2.84116	3.50737	1.13053
4.30579	2.74976	3.47414	1.12409
4.21803	2.81724	3.46634	1.12241
4.16821	2.66584	3.56378	1.2537
4.27898	2.70693	3.57454	1.13735
4.22198	2.73331	3.52186	1.08639
4.39245	2.7418	3.48379	1.11954
4.15571	2.69397	3.47295	1.20152
4.33524	2.74441	3.43393	1.28119
4.3569	2.74813	3.50399	1.20647
4.307	2.69863	3.46821	1.28589
4.34737	2.8332	3.40582	1.39601
4.11239	2.84852	3.43088	1.31349
4.28686	2.78592	3.50174	1.39005
4.18639	2.84741	3.43496	1.32376
4.22533	2.75361	3.43855	1.44459
4.39482	2.77125	3.51184	1.32891
4.32904	2.67382	3.52438	1.31528
4.50897	2.64495	3.58779	1.41082
4.4041	2.57391	3.63986	1.38189
4.25096	2.70838	3.51919	1.3319
4.12395	2.68829	3.41908	1.19971
4.17639	2.72273	3.50467	1.29696
4.10143	2.69166	3.48245	1.37576
4.07258	2.66294	3.45858	1.27384
4.11348	2.71998	3.38008	1.31385
4.27872	2.69031	3.37577	1.29862
4.28231	2.77628	3.53272	1.22977
4.35753	2.72197	3.49267	1.23331
4.35036	2.64225	3.55956	1.35998
4.312	2.70774	3.55802	1.32676
4.34748	2.79357	3.56423	1.38855
4.21424	2.74075	3.61093	1.40605
4.00423	2.66261	3.62258	1.35765
4.14928	2.66137	3.47243	1.40762
4.15233	2.71457	3.35811	1.32969
4.12542	2.78432	3.36279	1.38504
4.22153	2.71838	3.29591	1.35355
4.30281	2.71485	3.40929	1.31597
4.42427	2.77043	3.42613	1.26111
4.32679	2.75926	3.42116	1.30637
4.32904	2.74243	3.51362	1.27014
4.37184	2.70814	3.54434	1.22605
4.35419	2.75865	3.46936	1.33557
4.46166	2.71193	3.41146	1.30498
4.43359	2.70532	3.43721	1.24684
4.29	2.78518	3.43782	1.23199
4.19357	2.68739	3.34155	1.27947
4.31825	2.67772	3.32647	1.21777
4.38402	2.74701	3.3771	1.15953
4.38601	2.66865	3.36228	1.34189
4.20816	2.68364	3.38978	1.33435
4.2557	2.65622	3.37692	1.34476
4.30478	2.73966	3.42303	1.28499
4.41605	2.74039	3.50621	1.33435
4.22315	2.6635	3.53671	1.3524
4.25482	2.66792	3.43362	1.35093
4.28393	2.74472	3.44167	1.3652
4.16039	2.77418	3.46696	1.24486
4.09199	2.85115	3.49047	1.15199
4.0602	2.81495	3.49553	1.26043
4.32992	2.72559	3.55234	1.28283
4.4289	2.74614	3.51471	1.25314
4.29399	2.80818	3.47964	1.41644
4.3057	2.82018	3.53188	1.39131
4.3125	2.77509	3.52724	1.37817
4.30535	2.76098	3.51354	1.36276
4.20891	2.76648	3.51644	1.31434
4.31921	2.74292	3.4536	1.38645
4.37707	2.7729	3.56969	1.36863
4.41461	2.79555	3.58499	1.35647
4.30094	2.79583	3.57836	1.31943
4.47957	2.78048	3.58439	1.22664
4.35146	2.85897	3.48724	1.34678
4.4018	2.79866	3.43639	1.26663
4.38869	2.78312	3.4562	1.29768
4.36082	2.81959	3.51241	1.25026
4.28418	2.71798	3.55657	1.20133
4.46599	2.85026	3.58014	1.32384
4.51529	2.78266	3.49219	1.17065
4.45741	2.69926	3.57426	1.19731
4.4766	2.66573	3.58086	1.19251
4.40982	2.72076	3.47746	1.23049
4.4617	2.69064	3.50038	1.3008
4.27457	2.72509	3.54314	1.1595
4.37012	2.64972	3.48331	1.32565
4.52288	2.69337	3.55343	1.20149
4.51883	2.71501	3.39092	1.19669
4.36967	2.65229	3.40291	1.33055
4.4253	2.68611	3.4592	1.2358
4.42543	2.74097	3.43724	1.21604
4.30519	2.82362	3.44541	1.22748
4.45968	2.83267	3.52525	1.18355
4.34331	2.75799	3.51991	1.13455
4.36933	2.71146	3.4817	1.2134
4.38881	2.69116	3.53377	1.18194
4.35457	2.66393	3.55495	1.22077
4.2898	2.68805	3.52757	1.16788
4.34483	2.71974	3.46495	1.18849
4.41547	2.75598	3.46522	1.28765
4.21914	2.74388	3.47333	1.20082
4.29643	2.80984	3.49453	1.25814
4.38897	2.76943	3.47734	1.25826
4.31339	2.78051	3.45312	1.29909
4.34481	2.75606	3.47985	1.27035
4.31887	2.64488	3.48546	1.39148
4.26426	2.68176	3.48686	1.29526
4.35012	2.72187	3.47561	1.30677
4.39087	2.76624	3.40991	1.2391
4.3908	2.79979	3.42122	1.24836
4.45382	2.69498	3.48803	1.24781
4.35721	2.61498	3.48109	1.30608
4.31081	2.70454	3.38801	1.35136
4.41043	2.65014	3.42148	1.33041
4.30122	2.70882	3.37127	1.35984
4.40701	2.75864	3.40225	1.33839
4.4431	2.74164	3.52936	1.22546
4.29088	2.74698	3.40663	1.24208
4.40558	2.6905	3.45755	1.27106
4.38699	2.77943	3.49927	1.31911
4.499	2.73475	3.52848	1.29429
4.44464	2.68149	3.50461	1.20815
4.38482	2.69196	3.46489	1.20646
4.46029	2.7125	3.44927	1.30417
4.46182	2.69256	3.46142	1.31418
4.44838	2.73371	3.46954	1.32753
4.37475	2.71416	3.52979	1.25544
4.47078	2.74236	3.51846	1.22845
4.2897	2.7611	3.47248	1.31304
4.28064	2.85098	3.51462	1.23096
4.36989	2.81378	3.50222	1.21064
4.36646	2.79843	3.44259	1.32264
4.49548	2.83582	3.54324	1.28818
4.49425	2.78597	3.53674	1.21705
4.48245	2.7808	3.54098	1.2401
4.35865	2.79478	3.46898	1.14707
4.39879	2.69574	3.5138	1.13632
4.40562	2.72508	3.47754	1.24692
4.29849	2.68694	3.42067	1.16843
4.34954	2.71457	3.48311	1.21974
4.42991	2.73784	3.43401	1.16426
4.28998	2.71496	3.46699	1.197
4.30114	2.72574	3.52892	1.24756
4.3114	2.7726	3.52053	1.21299
4.16795	2.78717	3.50671	1.21498
4.26701	2.78002	3.48218	1.23381
4.37601	2.74923	3.55032	1.25663
4.56479	2.7399	3.50249	1.20491
4.3852	2.73123	3.50713	1.24072
4.4783	2.7135	3.53069	1.23096
4.40772	2.65377	3.54134	1.17842
4.36448	2.62739	3.51336	1.16307
4.33138	2.6093	3.58874	1.15682
4.37916	2.66428	3.58542	1.24987
4.32993	2.64272	3.5057	1.31348
4.39484	2.64527	3.48864	1.30194
4.33704	2.64746	3.51204	1.27416
4.42352	2.65551	3.4312	1.27331
4.53109	2.70776	3.41958	1.25526
4.40386	2.67421	3.43656	1.24497
4.39977	2.61891	3.42116	1.21106
4.34509	2.6881	3.39401	1.24557
4.3216	2.6847	3.48942	1.28791
4.45331	2.69417	3.43062	1.30804
4.43524	2.70867	3.35809	1.26341
4.37013	2.69838	3.36801	1.23259
4.34172	2.60859	3.37753	1.32158
4.3537	2.71815	3.41949	1.28902
4.42208	2.75569	3.44967	1.28261
4.37394	2.68221	3.40698	1.26916
4.47003	2.77236	3.43701	1.2667
4.43956	2.70331	3.38853	1.18986
4.32226	2.65806	3.45	1.14473
4.37806	2.60147	3.45143	1.18522
4.51007	2.59667	3.46358	1.25247
4.47828	2.63447	3.47397	1.26301
4.38198	2.65138	3.46193	1.25514
4.44723	2.80531	3.39688	1.21139
4.46448	2.76285	3.49268	1.31233
4.37498	2.76642	3.51291	1.29173
4.44042	2.74749	3.52535	1.29841
4.35044	2.78655	3.52515	1.26851
4.28008	2.70166	3.47133	1.32932
4.34281	2.69906	3.51623	1.24655
4.38042	2.7046	3.5372	1.32805
4.33634	2.73578	3.5086	1.25137
4.35614	2.71439	3.5525	1.17397
4.31565	2.70204	3.58714	1.18513
4.19839	2.65016	3.494	1.1666
4.29397	2.68215	3.45852	1.18031
4.40019	2.79131	3.48747	1.20357
4.44239	2.7624	3.48825	1.19728
4.45549	2.74364	3.56595	1.15645
4.36217	2.7387	3.50139	1.1447
4.33533	2.79546	3.53003	1.19033
4.31498	2.6996	3.41564	1.19589
4.20185	2.72572	3.45223	1.17623
4.29533	2.66466	3.4392	1.20356
4.33314	2.72179	3.34412	1.19287
4.27204	2.65178	3.41284	1.23751
4.37136	2.71204	3.3642	1.28792
4.2988	2.75995	3.4405	1.23128
4.26501	2.65821	3.42563	1.30979
4.31582	2.69922	3.45956	1.31237
4.3716	2.79313	3.38638	1.29365
4.44295	2.75726	3.35236	1.32768
4.37099	2.78372	3.32091	1.27246
4.26905	2.70098	3.3581	1.3081
4.29931	2.63598	3.42607	1.25166
4.32341	2.70924	3.4205	1.24873
4.33543	2.67749	3.40685	1.31623
4.26801	2.69067	3.42408	1.26489
4.23157	2.68093	3.38487	1.21282
4.40263	2.68269	3.35067	1.26448
4.32438	2.73122	3.32053	1.24513
4.2804	2.74877	3.40171	1.29866
4.28622	2.73067	3.41184	1.32629
4.27113	2.7685	3.4465	1.35442
4.26984	2.72549	3.38304	1.33445
4.22182	2.72646	3.42698	1.2546
4.22242	2.71961	3.43537	1.28332
4.30526	2.64817	3.39733	1.19845
4.15027	2.70576	3.49338	1.25969
4.20455	2.64252	3.46656	1.2641
4.26219	2.62773	3.37365	1.188
4.32222	2.71613	3.40926	1.15831
4.3586	2.66636	3.41495	1.23729
4.32715	2.64756	3.42432	1.3066
4.31193	2.70847	3.43642	1.26987
4.41837	2.73767	3.46093	1.23963
4.3231	2.77828	3.42485	1.28516
4.40934	2.7456	3.39127	1.2878
4.38102	2.75647	3.45139	1.32264
4.44007	2.66373	3.5082	1.33512
4.35842	2.75281	3.50046	1.23331
4.41144	2.73487	3.44624	1.25099
4.38702	2.68325	3.45991	1.28948
4.3528	2.68427	3.48573	1.31359
4.39375	2.70907	3.42875	1.33144
4.40379	2.71168	3.43526	1.29314
4.33324	2.73087	3.39404	1.25954
4.39306	2.68836	3.37776	1.31616
4.46207	2.61899	3.39268	1.34769
4.40466	2.64932	3.40241	1.36829
4.4092	2.65338	3.41505	1.28813
4.35223	2.69804	3.4543	1.23601
4.41248	2.62972	3.4712	1.26537
4.4341	2.62281	3.45453	1.26209
4.47217	2.65893	3.4521	1.21773
4.44652	2.71581	3.46244	1.24989
4.46436	2.64751	3.4242	1.22253
4.4255	2.68253	3.47428	1.21323
4.48814	2.64944	3.44908	1.23277
4.39089	2.65226	3.40224	1.23066
4.50378	2.71093	3.43461	1.24178
4.59124	2.69955	3.4234	1.19049
4.45827	2.68896	3.46728	1.16178
4.51302	2.67751	3.45427	1.2266
4.37591	2.64121	3.49455	1.24478
4.35348	2.67282	3.47858	1.21916
4.3934	2.71615	3.52623	1.21524
4.36115	2.68842	3.44616	1.24185
4.19198	2.67767	3.4322	1.20322
4.33134	2.69933	3.43819	1.1681
4.45175	2.70529	3.46369	1.20366
4.44959	2.67046	3.42438	1.19935
4.48496	2.65364	3.37365	1.19869
4.39811	2.72468	3.38377	1.24674
4.25623	2.734	3.47243	1.28248
4.23339	2.71811	3.43048	1.25945
4.3517	2.72438	3.40176	1.23499
4.33283	2.74248	3.45323	1.2261
4.39139	2.71934	3.4763	1.22718
4.33087	2.64056	3.51188	1.24135
4.37268	2.60029	3.52645	1.22541
4.3099	2.66722	3.49423	1.19285
4.28826	2.60809	3.46827	1.22516
4.39499	2.64634	3.42576	1.19899
4.31148	2.77799	3.42242	1.23217
4.27238	2.79484	3.38951	1.22723
4.33615	2.70588	3.42474	1.26198
4.3587	2.73437	3.35052	1.297
4.43621	2.77703	3.40026	1.27387
4.37722	2.79695	3.52009	1.26672
4.29375	2.85071	3.4579	1.24176
4.38892	2.8785	3.43509	1.25514
4.33689	2.8409	3.41772	1.21565
4.33913	2.80678	3.35275	1.22951
4.39706	2.73295	3.43688	1.20407
4.28949	2.7451	3.36833	1.22265
4.36332	2.72062	3.35719	1.23078
4.30866	2.687	3.40441	1.19823
4.45957	2.66641	3.44299	1.22882
4.50434	2.70712	3.45641	1.21004
4.41087	2.67458	3.48673	1.21416
4.42327	2.67875	3.42245	1.21465
4.29671	2.65585	3.47812	1.20481
4.31138	2.70716	3.4786	1.21891
4.36987	2.63785	3.42301	1.26705
4.38009	2.65762	3.3914	1.24146
4.36038	2.71201	3.39202	1.23795
4.43027	2.743	3.41472	1.25755
4.37629	2.72988	3.43914	1.24432
4.35996	2.71076	3.34652	1.18589
4.33963	2.6612	3.39841	1.23622
4.33236	2.68421	3.45404	1.25565
4.38476	2.72711	3.40903	1.24384
4.35116	2.71161	3.41419	1.23087
4.32056	2.69259	3.41158	1.18896
4.28828	2.6956	3.45441	1.21418
4.3786	2.69588	3.43663	1.2404
4.33097	2.72448	3.40239	1.22209
4.23668	2.69064	3.45342	1.21766
4.28049	2.79227	3.50098	1.18836
4.27942	2.77372	3.49351	1.2203
4.32947	2.75914	3.42327	1.21706
4.40554	2.7178	3.48584	1.26209
4.30858	2.71816	3.49006	1.22249
4.26276	2.78923	3.46435	1.22374
4.29757	2.71713	3.3995	1.26743
4.28157	2.64205	3.42407	1.22337
4.29596	2.71727	3.41855	1.21057
4.41324	2.72388	3.4467	1.21354
4.33072	2.67731	3.51446	1.26082
4.29335	2.65522	3.47983	1.27701
4.37465	2.72843	3.45496	1.22121
4.40785	2.72279	3.42874	1.29984
4.51616	2.67937	3.36049	1.29092
4.42222	2.71512	3.42971	1.26389
4.38798	2.66189	3.48889	1.24506
4.33377	2.6962	3.42141	1.24442
4.38812	2.6954	3.47642	1.22912
4.38481	2.64254	3.42356	1.27741
4.30649	2.69814	3.40163	1.2622
4.32388	2.6878	3.46534	1.24171
4.25985	2.7226	3.42758	1.19051
4.30405	2.71702	3.38017	1.20077
4.36813	2.66819	3.42367	1.16647
4.32084	2.73619	3.44075	1.23557
4.24268	2.63946	3.37839	1.21575
4.26499	2.6348	3.3498	1.18029
4.32361	2.67442	3.34141	1.18779
4.30178	2.72174	3.41592	1.18369
4.43001	2.77532	3.41802	1.17062
4.39831	2.76956	3.4377	1.1594
4.41707	2.79427	3.41513	1.20505
4.44305	2.73268	3.36366	1.18828
4.32597	2.72973	3.41525	1.2206
4.41651	2.74311	3.40197	1.21775
4.42214	2.74989	3.43463	1.22834
4.42495	2.737	3.4178	1.18262
4.46742	2.7262	3.39833	1.21382
4.37261	2.66959	3.45069	1.18591
4.36186	2.6707	3.42029	1.17988
4.37913	2.70169	3.40131	1.19945
4.3953	2.74159	3.42071	1.24359
4.31325	2.73803	3.43374	1.22583
4.42501	2.6979	3.44826	1.21252
4.36922	2.74231	3.40858	1.20231
4.31309	2.77328	3.42413	1.23488
4.32856	2.78636	3.46885	1.23234
4.31645	2.77989	3.43199	1.19781
4.26483	2.74918	3.37398	1.21229
4.26343	2.67537	3.36858	1.22247
4.28733	2.66942	3.42605	1.19204
4.17841	2.75773	3.36932	1.22202
4.13778	2.69932	3.3701	1.2339
4.23624	2.73276	3.41281	1.24493
4.23596	2.77422	3.42066	1.24757
4.29854	2.72171	3.41766	1.23146
4.24952	2.75536	3.4269	1.26679
4.29922	2.68953	3.4655	1.25401
4.27428	2.75802	3.45803	1.20594
4.27807	2.6944	3.4585	1.25799
4.24929	2.65796	3.42215	1.26133
4.35599	2.70156	3.4263	1.25085
4.33685	2.7225	3.40396	1.18716
4.40136	2.67124	3.35311	1.2317
4.37017	2.70405	3.3729	1.24367
4.39265	2.6804	3.41042	1.20615
4.32355	2.66281	3.43114	1.24784
4.38811	2.69688	3.41938	1.24621
4.34988	2.67338	3.47081	1.25145
4.40829	2.70173	3.40802	1.25389
4.3258	2.68582	3.40238	1.24612
4.39089	2.67494	3.41524	1.23139
4.34144	2.74253	3.41688	1.23702
4.33095	2.70025	3.41319	1.22481
4.3227	2.74405	3.48601	1.25014
4.28913	2.66829	3.43804	1.16548
4.21901	2.67607	3.45004	1.20681
4.22226	2.74816	3.43425	1.20931
4.2542	2.76678	3.44778	1.19322
4.28974	2.79997	3.42367	1.1884
4.27953	2.73986	3.43974	1.20853
4.31635	2.73725	3.46792	1.18989
4.26999	2.69767	3.45392	1.19229
4.29487	2.63151	3.506	1.20188
4.29238	2.65272	3.5289	1.22874
4.22916	2.65896	3.52831	1.25792
4.34953	2.72415	3.47671	1.23589
4.29745	2.65205	3.46109	1.26717
4.28828	2.68108	3.43554	1.23953
4.23452	2.74411	3.44053	1.23885
4.23092	2.68667	3.43995	1.24642
4.22524	2.73323	3.41667	1.21212
4.21696	2.76006	3.46685	1.18335
4.32581	2.74326	3.42627	1.24487
4.33006	2.73203	3.43693	1.24946
4.27695	2.74379	3.45689	1.25587
4.27442	2.73238	3.49795	1.25636
4.32219	2.71369	3.43928	1.20654
4.34165	2.67336	3.46735	1.24615
4.31345	2.68526	3.42032	1.19178
4.19356	2.7353	3.37647	1.18949
4.32179	2.67853	3.38827	1.21275
4.24722	2.65369	3.37722	1.21488
4.30053	2.62095	3.36419	1.21888
4.30078	2.62239	3.41024	1.21393
4.3351	2.64276	3.3925	1.16991
4.37939	2.69603	3.41939	1.16792
4.34939	2.74496	3.36829	1.19614
4.32802	2.71325	3.42383	1.22313
4.3366	2.7151	3.41553	1.24792
4.33279	2.72748	3.4079	1.20269
4.38206	2.69192	3.40688	1.2218
4.3087	2.64384	3.37284	1.22749
4.37594	2.61918	3.40747	1.24504
4.34939	2.66074	3.4521	1.22441
4.317	2.64674	3.43424	1.20677
4.26341	2.64054	3.40945	1.20467
4.29713	2.62866	3.40721	1.24776
4.28757	2.61834	3.38351	1.23342
4.33604	2.58279	3.33808	1.20349
4.30379	2.65422	3.40789	1.24099
4.33925	2.73976	3.38271	1.22408
4.40902	2.67812	3.45018	1.22629
4.26609	2.66921	3.50104	1.16278
4.22217	2.70924	3.40026	1.20363
4.27516	2.75739	3.38218	1.19552
4.29433	2.73595	3.41312	1.16646
4.26148	2.6301	3.45722	1.19565
4.27447	2.71221	3.44493	1.20391
4.24612	2.71187	3.45601	1.18065
4.2488	2.715	3.45832	1.18624
4.26469	2.69974	3.46874	1.19137
4.27567	2.74624	3.46944	1.19536
4.34669	2.75791	3.44604	1.17706
4.34677	2.72596	3.51301	1.16362
4.32036	2.77415	3.4979	1.17002
4.37135	2.77	3.48709	1.19075
4.40693	2.80045	3.43192	1.20087
4.42582	2.81713	3.46411	1.19466
4.38445	2.82193	3.44312	1.15375
4.40889	2.80053	3.47288	1.17819
4.36671	2.69159	3.48929	1.18667
4.40605	2.72259	3.46846	1.23356
4.41844	2.74676	3.4675	1.21722
4.38364	2.67278	3.42347	1.23788
4.328	2.67181	3.41377	1.2422
4.25386	2.71974	3.41109	1.20616
4.31113	2.61555	3.35562	1.20342
4.34617	2.64172	3.44951	1.21638
4.37036	2.70188	3.40343	1.2368
4.32992	2.65577	3.41353	1.24557
4.32739	2.59935	3.448	1.20487
4.28908	2.61405	3.41996	1.19476
4.23448	2.69447	3.41824	1.21826
4.21683	2.77516	3.39195	1.19042
4.24627	2.68323	3.37018	1.18685
4.23952	2.65081	3.34309	1.22024
4.23719	2.61135	3.36243	1.23563
4.29287	2.59656	3.3544	1.19702
4.34373	2.68618	3.38362	1.22178
4.37067	2.61162	3.38651	1.20132
4.39447	2.59022	3.43659	1.21017
4.3067	2.6644	3.39397	1.19303
4.26521	2.67471	3.40568	1.1861
4.33172	2.70579	3.42461	1.187
4.34301	2.64623	3.41288	1.19522
4.26794	2.69244	3.43616	1.20885
4.28276	2.6946	3.43255	1.24637
4.34012	2.68577	3.37031	1.22164
4.38184	2.63498	3.34972	1.24418
4.39192	2.64326	3.37871	1.21856
4.28086	2.69212	3.39991	1.18
4.32535	2.6522	3.39256	1.20314
4.36906	2.70227	3.37189	1.19602
4.29933	2.72702	3.39361	1.15878
4.2845	2.69267	3.40911	1.16669
4.22581	2.73302	3.38329	1.16736
4.20304	2.65934	3.38867	1.21065
4.21806	2.68267	3.37677	1.18444
4.18431	2.69263	3.38759	1.18633
4.25238	2.68331	3.39967	1.19747
4.22742	2.70242	3.38784	1.22589
4.26454	2.67259	3.34568	1.23448
4.2767	2.68381	3.34423	1.23258
4.35673	2.6655	3.37854	1.20816
4.34518	2.7069	3.41751	1.19277
4.18491	2.68065	3.40084	1.18209
4.27817	2.69719	3.39013	1.16072
4.30994	2.73085	3.36992	1.1148
4.25024	2.66521	3.38765	1.16195
4.2284	2.62034	3.4059	1.16029
4.30079	2.63263	3.41514	1.18078
4.32852	2.67137	3.42753	1.18906
4.3211	2.63146	3.43587	1.18188
4.31486	2.65587	3.4198	1.20011
4.37001	2.65418	3.38714	1.20577
4.3159	2.66623	3.38443	1.23526
4.25699	2.70084	3.37725	1.21885
4.27988	2.69396	3.37918	1.20626
4.35132	2.65819	3.39095	1.20108
4.30071	2.65164	3.35833	1.17009
4.3284	2.64407	3.38321	1.1542
4.30624	2.62203	3.37546	1.16718
4.32805	2.64027	3.3558	1.16421
4.31093	2.64628	3.36996	1.20666
4.30965	2.65432	3.37167	1.17631
4.39933	2.64306	3.33597	1.23812
4.38827	2.67065	3.37379	1.26471
4.3352	2.66226	3.35121	1.20564
4.32983	2.6941	3.37766	1.17219
4.34203	2.68749	3.35295	1.23809
4.4236	2.7	3.34866	1.24726
4.30515	2.66329	3.36949	1.1913
4.33266	2.67456	3.35454	1.17536
4.28989	2.67655	3.38941	1.17971
4.33474	2.71567	3.38934	1.23868
4.38132	2.70132	3.3757	1.20763
4.40306	2.69337	3.3271	1.22568
4.29263	2.66319	3.37429	1.23725
4.35767	2.72523	3.4098	1.18892
4.37451	2.72574	3.34413	1.19375
4.38636	2.72272	3.3189	1.20805
4.22408	2.68144	3.33169	1.1751
4.42993	2.68997	3.34647	1.19193
4.44672	2.6229	3.31938	1.21321
4.38887	2.66314	3.32426	1.21418
4.39726	2.70201	3.31453	1.21484
4.31877	2.67608	3.33356	1.19317
4.30339	2.69636	3.32453	1.23928
4.31731	2.66605	3.34503	1.22315
4.33337	2.63268	3.3622	1.21568
4.30323	2.69202	3.40017	1.20863
4.35531	2.7131	3.39194	1.21398
4.34825	2.67992	3.34655	1.19861
4.31893	2.68854	3.37883	1.20242
4.29739	2.68211	3.37022	1.19251
4.3135	2.68323	3.34894	1.1754
4.38198	2.70786	3.39532	1.22342
4.4	2.65765	3.37481	1.21463
4.37675	2.62452	3.38977	1.22891
4.38311	2.68917	3.3341	1.18529
4.40285	2.69649	3.37494	1.17828
4.36869	2.71448	3.38516	1.18515
4.34761	2.67573	3.35559	1.19007
4.41674	2.64672	3.36251	1.20328
4.35163	2.68542	3.38134	1.19841
4.3693	2.67477	3.39943	1.23159
4.36656	2.63475	3.38499	1.20365
4.29876	2.71808	3.43797	1.20891
4.29085	2.68503	3.35935	1.21623
4.34287	2.70305	3.34237	1.21753
4.33762	2.68161	3.35491	1.21935
4.35368	2.70195	3.34973	1.18013
4.3815	2.7541	3.3601	1.14468
4.37199	2.67349	3.35435	1.19185
4.43948	2.61999	3.37675	1.18463
4.42487	2.64843	3.38139	1.17021
4.38302	2.66226	3.39399	1.20581
4.41529	2.65837	3.39097	1.22409
4.38396	2.63489	3.37239	1.18924
4.37877	2.63853	3.37517	1.16646
4.34735	2.61097	3.35479	1.18271
4.39935	2.61378	3.37053	1.20877
4.36939	2.62624	3.36681	1.2363
4.4068	2.62451	3.37044	1.24543
4.39555	2.66421	3.33327	1.21984
4.38977	2.6366	3.32924	1.23002
4.3914	2.61522	3.35365	1.22605
4.36286	2.6274	3.31646	1.17616
4.37943	2.64839	3.36964	1.16076
4.31929	2.62916	3.34775	1.17895
[truncated: 1,503 more rows]

## Sheet: Reverse Ensembles
**Timescale = 0.4 ms
WT	R712L + 50 μM OM	R712L + 200 μM OM	R712L
3.32095	1.82467	2.26529	1.2223
3.32095	1.82319	2.26867	1.22144
3.32095	1.82166	2.27602	1.22298
3.32095	1.82107	2.28062	1.22314
3.32095	1.82017	2.27384	1.22128
3.32095	1.82179	2.27331	1.2218
3.32095	1.81878	2.26976	1.22122
3.32095	1.82352	2.26922	1.21987
3.32095	1.82477	2.27183	1.22019
3.32095	1.82321	2.26869	1.22104
3.32095	1.82691	2.26507	1.22191
3.32095	1.82444	2.26566	1.22256
3.32095	1.8248	2.27216	1.22226
3.32095	1.82315	2.26264	1.22162
3.32095	1.8213	2.26783	1.22264
3.32095	1.82086	2.26418	1.22202
3.32095	1.82154	2.2719	1.22191
3.32095	1.8196	2.27554	1.22254
3.32095	1.82244	2.27241	1.22282
3.32095	1.82318	2.27558	1.22292
3.32095	1.82466	2.27547	1.2223
3.32095	1.82417	2.27843	1.2221
3.32095	1.82258	2.2746	1.22213
3.32095	1.82151	2.26627	1.22212
3.32095	1.82326	2.27175	1.22238
3.32095	1.82335	2.27378	1.22253
3.32095	1.82201	2.27605	1.22252
3.32095	1.8222	2.27725	1.22314
3.32095	1.82305	2.27751	1.2235
3.32095	1.82102	2.28024	1.22328
3.32095	1.82205	2.28202	1.22429
3.32095	1.82177	2.28453	1.22296
3.32095	1.82309	2.28315	1.22158
3.32095	1.82327	2.27983	1.22231
3.32095	1.82247	2.27127	1.2219
3.32095	1.82008	2.27016	1.22192
3.32095	1.82221	2.265	1.22138
3.32095	1.82342	2.26749	1.22152
3.32095	1.8212	2.26734	1.22058
3.32095	1.82332	2.26031	1.22106
3.32095	1.82265	2.26077	1.22321
3.32095	1.82476	2.26602	1.22197
3.32095	1.82418	2.26885	1.2218
3.32095	1.82468	2.26954	1.2219
3.32095	1.82491	2.26943	1.22269
3.32095	1.82326	2.26269	1.22339
3.32095	1.8237	2.26521	1.22246
3.32095	1.82191	2.26321	1.22191
3.32095	1.82424	2.26256	1.22135
3.32095	1.82352	2.2604	1.22144
3.32095	1.82101	2.25402	1.22172
3.32095	1.82151	2.26018	1.2218
3.32095	1.82203	2.26305	1.22276
3.32095	1.82293	2.26104	1.22265
3.32095	1.82435	2.26888	1.22201
3.32095	1.8228	2.2684	1.22116
3.32095	1.82065	2.277	1.22179
3.32095	1.82421	2.27668	1.22188
3.32095	1.82318	2.27448	1.22193
3.32095	1.82217	2.27194	1.2219
3.32095	1.82561	2.27492	1.22252
3.32095	1.82429	2.27871	1.22189
3.32095	1.82496	2.27934	1.22178
3.32095	1.82446	2.28309	1.2224
3.32095	1.82278	2.27816	1.2223
3.32095	1.8231	2.27928	1.22272
3.32095	1.82161	2.26903	1.22234
3.32095	1.82135	2.27461	1.22197
3.32095	1.82304	2.27553	1.22151
3.32095	1.82146	2.27161	1.22241
3.32095	1.8213	2.27204	1.22275
3.32095	1.82128	2.27638	1.2224
3.32095	1.82342	2.27143	1.22165
3.32095	1.82236	2.27529	1.22274
3.32095	1.82345	2.27997	1.22218
3.32095	1.82247	2.27294	1.22239
3.32095	1.82258	2.26757	1.22214
3.32095	1.82443	2.27169	1.2221
3.32095	1.82723	2.27381	1.2243
3.32095	1.82704	2.2629	1.22209
3.32095	1.82281	2.25964	1.22283
3.32095	1.82216	2.26227	1.22257
3.32095	1.82415	2.27137	1.22239
3.32095	1.82385	2.2698	1.22289
3.32095	1.82232	2.27229	1.22167
3.32095	1.82162	2.2824	1.22043
3.32095	1.81967	2.28157	1.2214
3.32095	1.8191	2.27144	1.22125
3.32095	1.8194	2.26044	1.22154
3.32095	1.82258	2.25752	1.22156
3.32095	1.82063	2.25899	1.22236
3.32095	1.82333	2.25729	1.22164
3.32095	1.82082	2.25655	1.22115
3.32095	1.82089	2.26083	1.22011
3.32095	1.82502	2.26772	1.21991
3.32095	1.82182	2.27344	1.22115
3.32095	1.82515	2.27697	1.22085
3.32095	1.82487	2.27101	1.22121
3.32095	1.82311	2.27333	1.22198
3.32095	1.82317	2.27821	1.22185
3.32095	1.82523	2.26931	1.2232
3.32095	1.82308	2.26776	1.22278
3.32095	1.82195	2.27196	1.22293
3.32095	1.82137	2.26596	1.22218
3.32095	1.82138	2.27474	1.22189
3.32095	1.82314	2.27277	1.22331
3.32095	1.82208	2.26961	1.22282
3.32095	1.82418	2.27068	1.22252
3.32095	1.82275	2.27059	1.22217
3.32095	1.82227	2.27558	1.22208
3.32095	1.8235	2.27824	1.22185
3.32095	1.82601	2.28486	1.22294
3.32095	1.82434	2.28548	1.22379
3.32095	1.82355	2.28738	1.22353
3.32095	1.82307	2.27652	1.22392
3.32095	1.81929	2.2709	1.22172
3.32095	1.81942	2.26949	1.22037
3.32095	1.81881	2.26479	1.22102
3.32095	1.81942	2.27282	1.22267
3.32095	1.82093	2.27672	1.22239
3.32095	1.82162	2.27043	1.22149
3.32095	1.82392	2.27206	1.22067
3.32095	1.82424	2.28307	1.22176
3.32095	1.82332	2.27345	1.22187
3.32095	1.82119	2.27093	1.22138
3.32095	1.82505	2.27402	1.2213
3.32095	1.82457	2.26981	1.22259
3.32095	1.82316	2.27889	1.22268
3.32095	1.82199	2.26996	1.22138
3.32095	1.82146	2.27069	1.22315
3.32095	1.82273	2.26822	1.22281
3.32095	1.82214	2.26304	1.22096
3.32095	1.82322	2.2712	1.2212
3.32095	1.82307	2.26607	1.22203
3.32095	1.82375	2.27181	1.22176
3.32095	1.82553	2.27366	1.22144
3.32095	1.82375	2.27352	1.22273
3.32095	1.82295	2.27077	1.22298
3.32095	1.82285	2.27443	1.22301
3.32095	1.8237	2.27321	1.22257
3.32095	1.82465	2.27442	1.2219
3.32095	1.826	2.27013	1.22146
3.32095	1.82409	2.26363	1.22211
3.32095	1.82244	2.26587	1.22215
3.32095	1.82203	2.26353	1.22314
3.32095	1.82264	2.26601	1.22186
3.32095	1.82444	2.26578	1.22229
3.32095	1.82425	2.27321	1.22325
3.32095	1.82318	2.27431	1.223
3.32095	1.82105	2.27602	1.22324
3.32095	1.82177	2.27764	1.22339
3.32095	1.82358	2.28275	1.22258
3.32095	1.82537	2.28219	1.22316
3.32095	1.82164	2.28366	1.22212
3.32095	1.82307	2.27738	1.2222
3.32095	1.82496	2.27902	1.22241
3.32095	1.82478	2.27861	1.22265
3.32095	1.82566	2.2765	1.22307
3.32095	1.82603	2.27533	1.22235
3.32095	1.82528	2.27463	1.22111
3.32095	1.82573	2.27962	1.22145
3.32095	1.82766	2.27591	1.22154
3.32095	1.82834	2.27092	1.22207
3.32095	1.82744	2.27683	1.22284
3.32095	1.82373	2.27968	1.22182
3.32095	1.82447	2.27518	1.22267
3.32095	1.82387	2.28061	1.22292
3.32095	1.81905	2.282	1.22287
3.32095	1.81803	2.28429	1.22178
3.32095	1.81837	2.28232	1.22126
3.32095	1.81905	2.28007	1.22228
3.32095	1.82134	2.27953	1.22168
3.32095	1.82424	2.28564	1.22186
3.32095	1.82207	2.2896	1.22194
3.32095	1.82027	2.28094	1.22071
3.32095	1.81919	2.28534	1.22126
3.32095	1.82115	2.28818	1.22257
3.32095	1.82335	2.29118	1.22255
3.32095	1.82485	2.29351	1.22193
3.32095	1.82393	2.27859	1.22093
3.32095	1.82325	2.28164	1.22213
3.32095	1.82216	2.27466	1.22272
3.32095	1.82154	2.2728	1.22294
3.32095	1.8213	2.27312	1.22322
3.32095	1.82112	2.27685	1.22246
3.32095	1.8245	2.26973	1.22311
3.32095	1.82265	2.26729	1.22267
3.32095	1.82402	2.27397	1.22299
3.32095	1.82292	2.27262	1.22239
3.32095	1.82302	2.2756	1.22176
3.32095	1.82527	2.27638	1.2224
3.32095	1.82317	2.27657	1.22143
3.32095	1.82195	2.27697	1.22124
3.32095	1.8199	2.27268	1.22157
3.32095	1.81828	2.26709	1.22094
3.32095	1.81837	2.26496	1.2203
3.32095	1.82119	2.26218	1.22186
3.32095	1.8232	2.26004	1.22217
3.32095	1.8245	2.26775	1.22225
3.32095	1.82294	2.26431	1.22261
3.32095	1.82491	2.26816	1.22195
3.32095	1.82347	2.27037	1.22149
3.32095	1.82586	2.27793	1.22158
3.32095	1.82355	2.27909	1.22161
3.32095	1.82431	2.27979	1.22187
3.32095	1.82173	2.28052	1.22121
3.32095	1.82281	2.27855	1.22256
3.32095	1.8226	2.27505	1.22234
3.32095	1.82324	2.27281	1.22111
3.32095	1.82283	2.26984	1.22135
3.32095	1.82034	2.27656	1.22222
3.32095	1.82332	2.27581	1.22281
3.32095	1.82207	2.26799	1.22173
3.32095	1.82519	2.27367	1.22136
3.32095	1.82655	2.27864	1.22231
3.32095	1.82625	2.27493	1.22305
3.32095	1.8253	2.2699	1.22114
3.32095	1.82398	2.26955	1.22164
3.32095	1.82531	2.26747	1.22151
3.32095	1.82618	2.27419	1.22127
3.32095	1.82424	2.26844	1.22217
3.32095	1.8217	2.26771	1.22198
3.32095	1.82046	2.2709	1.22183
3.32095	1.82145	2.26047	1.22227
3.32095	1.8205	2.26499	1.22323
3.32095	1.82167	2.26543	1.22256
3.32095	1.82211	2.27047	1.22193
3.32095	1.82199	2.26905	1.22279
3.32095	1.82022	2.26776	1.22164
3.32095	1.8198	2.27491	1.22203
3.32095	1.81988	2.27972	1.22092
3.32095	1.82258	2.27557	1.22039
3.32095	1.82295	2.27691	1.22102
3.32095	1.82267	2.28052	1.22224
3.32095	1.82334	2.28046	1.22223
3.32095	1.82378	2.2757	1.22306
3.32095	1.82302	2.27142	1.22284
3.32095	1.82305	2.27017	1.22292
3.32095	1.82249	2.26827	1.22202
3.32095	1.82404	2.2745	1.22095
3.32095	1.82434	2.27352	1.22108
3.32095	1.82196	2.27666	1.22193
3.32095	1.82318	2.27213	1.22182
3.32095	1.82371	2.2716	1.2225
3.32095	1.82218	2.27752	1.2215
3.32095	1.82602	2.27724	1.22223
3.32095	1.82536	2.27292	1.22235
3.32095	1.82524	2.27151	1.22112
3.32095	1.82473	2.27283	1.22275
3.32095	1.82428	2.27087	1.22271
3.32095	1.82378	2.2643	1.22188
3.32095	1.82335	2.26866	1.22302
3.32095	1.82052	2.26801	1.22204
3.32095	1.82334	2.2548	1.22186
3.32095	1.82265	2.26479	1.22164
3.32095	1.82212	2.26407	1.22175
3.32095	1.82261	2.26753	1.22369
3.32095	1.82129	2.27373	1.22287
3.32095	1.8205	2.27525	1.22326
3.32095	1.8216	2.27701	1.22175
3.32095	1.82285	2.27972	1.22205
3.32095	1.8213	2.27298	1.22268
3.32095	1.82048	2.26975	1.22162
3.32095	1.821	2.26897	1.22187
3.32095	1.82161	2.27418	1.22267
3.32095	1.8204	2.26608	1.22399
3.32095	1.82172	2.26997	1.22437
3.32095	1.82102	2.27237	1.22315
3.32095	1.82081	2.27046	1.22361
3.32095	1.82215	2.27337	1.22252
3.32095	1.82356	2.27632	1.2222
3.32095	1.82371	2.27953	1.22294
3.32095	1.8255	2.28566	1.22237
3.32095	1.82687	2.27901	1.22214
3.32095	1.82437	2.27976	1.22184
3.32095	1.82372	2.27611	1.22207
3.32095	1.82269	2.27193	1.22274
3.32095	1.82202	2.27847	1.22173
3.32095	1.82141	2.27858	1.22099
3.32095	1.82331	2.2829	1.22075
3.32095	1.82303	2.2759	1.22031
3.32095	1.82389	2.25997	1.22109
3.32095	1.824	2.26845	1.22142
3.32095	1.82213	2.26987	1.22294
3.32095	1.8236	2.27001	1.22145
3.32095	1.8225	2.27885	1.22145
3.32095	1.82109	2.27367	1.2217
3.32095	1.81998	2.27659	1.22171
3.32095	1.82339	2.28237	1.22203
3.32095	1.82039	2.28237	1.22226
3.32095	1.82093	2.28721	1.2215
3.32095	1.82191	2.29662	1.22241
3.32095	1.82129	2.29169	1.22245
3.32095	1.82435	2.27562	1.22107
3.32095	1.82278	2.27572	1.22211
3.32095	1.82071	2.2798	1.22266
3.32095	1.82069	2.28172	1.22257
3.32095	1.82236	2.27655	1.22219
3.32095	1.82178	2.28354	1.22217
3.32095	1.81967	2.29078	1.22398
3.32095	1.82287	2.28403	1.22237
3.32095	1.82278	2.28286	1.2222
3.32095	1.82117	2.28295	1.22274
3.32095	1.82061	2.27847	1.22253
3.32095	1.8202	2.28173	1.22273
3.32095	1.82087	2.27449	1.22257
3.32095	1.82067	2.27374	1.22157
3.32095	1.82449	2.27367	1.2231
3.32095	1.82184	2.27608	1.22233
3.32095	1.82067	2.28247	1.22234
3.32095	1.82379	2.26778	1.22167
3.32095	1.82421	2.26814	1.2222
3.32095	1.82348	2.27174	1.22135
3.32095	1.82062	2.2703	1.22264
3.32095	1.82041	2.27427	1.22114
3.32095	1.82023	2.27509	1.22166
3.32095	1.82412	2.26762	1.22233
3.32095	1.82394	2.26558	1.22267
3.32095	1.82238	2.26556	1.2222
3.32095	1.82507	2.26933	1.2225
3.32095	1.82431	2.26427	1.22236
3.32095	1.8232	2.26594	1.22205
3.32095	1.8243	2.27216	1.22281
3.32095	1.82515	2.27349	1.22165
3.32095	1.8252	2.26279	1.22267
3.32095	1.82397	2.26356	1.22293
3.32095	1.82477	2.27292	1.22202
3.32095	1.82361	2.28084	1.22117
3.32095	1.82056	2.28425	1.22186
3.32095	1.82311	2.27503	1.22196
3.32095	1.82382	2.28014	1.22145
3.32095	1.82194	2.27744	1.22176
3.32095	1.82092	2.28287	1.22249
3.32095	1.822	2.27958	1.22176
3.32095	1.82152	2.2835	1.22208
3.32095	1.82181	2.28156	1.22207
3.32095	1.82085	2.28171	1.22262
3.32095	1.82238	2.28464	1.22243
3.32095	1.82323	2.2821	1.22193
3.32095	1.82347	2.28464	1.22172
3.32095	1.82505	2.28854	1.22206
3.32095	1.82356	2.28878	1.22185
3.32095	1.82212	2.29542	1.22195
3.32095	1.82259	2.29666	1.22198
3.32095	1.82381	2.2882	1.2217
3.32095	1.82201	2.29038	1.22334
3.32095	1.82382	2.29637	1.22289
3.32095	1.82463	2.291	1.22243
3.32095	1.82367	2.28892	1.22242
3.32095	1.82669	2.29439	1.22294
3.32095	1.8254	2.28708	1.22199
3.32095	1.82924	2.28809	1.22238
3.32095	1.82993	2.29825	1.22298
3.32095	1.82738	2.29033	1.22295
3.32095	1.82673	2.28731	1.22269
3.32095	1.82569	2.28192	1.22249
3.32095	1.82609	2.28275	1.22153
3.32095	1.82431	2.28302	1.22206
3.32095	1.82076	2.29075	1.22272
3.32095	1.82198	2.28942	1.22251
3.32095	1.82314	2.28019	1.22354
3.32095	1.82445	2.27837	1.22368
3.32095	1.824	2.26078	1.22329
3.32095	1.82447	2.26299	1.22195
3.32095	1.8247	2.26589	1.22185
3.32095	1.82125	2.27464	1.22222
3.32095	1.82185	2.27134	1.22115
3.32095	1.82309	2.27625	1.22204
3.32095	1.82338	2.27492	1.22247
3.32095	1.82328	2.27772	1.22258
3.32095	1.82311	2.28164	1.22299
3.32095	1.82281	2.2835	1.22235
3.32095	1.82243	2.28533	1.2227
3.32095	1.82259	2.27083	1.22283
3.32095	1.8248	2.27136	1.22172
3.32095	1.82561	2.28372	1.22187
3.32095	1.82533	2.2816	1.22229
3.32095	1.82249	2.27926	1.22278
3.32095	1.8207	2.29267	1.2206
3.32095	1.82021	2.28574	1.22048
3.32095	1.82013	2.29151	1.22164
3.32095	1.82153	2.28965	1.22099
3.32095	1.82176	2.28922	1.22183
3.32095	1.82142	2.2914	1.22187
3.32095	1.82132	2.29554	1.22171
3.32095	1.82115	2.28888	1.22211
3.32095	1.82103	2.28475	1.22201
3.32095	1.82146	2.28854	1.2217
3.32095	1.8217	2.27294	1.22237
3.32095	1.82424	2.27736	1.22132
3.32095	1.82294	2.27784	1.22068
3.32095	1.82139	2.28	1.22144
3.32095	1.82161	2.28837	1.22147
3.32095	1.82118	2.28426	1.22171
3.32095	1.82178	2.29081	1.22149
3.32095	1.82442	2.28818	1.21979
3.32095	1.82355	2.28366	1.22135
3.32095	1.82506	2.28057	1.22066
3.32095	1.82624	2.27553	1.22166
3.32095	1.82585	2.27174	1.22042
3.32095	1.82618	2.26894	1.22074
3.32095	1.82479	2.26584	1.22155
3.32095	1.82556	2.26594	1.22158
3.32095	1.82185	2.28037	1.2223
3.32095	1.8255	2.27053	1.22146
3.32095	1.82421	2.27669	1.22151
3.32095	1.82704	2.27305	1.22201
3.32095	1.8245	2.27921	1.22156
3.32095	1.82014	2.28627	1.22213
3.32095	1.81985	2.28538	1.22302
3.32095	1.82099	2.27016	1.22272
3.32095	1.82188	2.27229	1.22216
3.32095	1.82274	2.28086	1.22244
3.32095	1.82158	2.26912	1.2222
3.32095	1.82162	2.2753	1.22211
3.32095	1.82286	2.28431	1.2222
3.32095	1.82291	2.29276	1.22231
3.32095	1.82104	2.28999	1.2224
3.32095	1.82155	2.28858	1.22267
3.32095	1.82457	2.28433	1.22229
3.32095	1.82437	2.28217	1.22201
3.32095	1.82527	2.2872	1.22076
3.32095	1.82522	2.28564	1.22097
3.32095	1.82377	2.29062	1.22057
3.32095	1.82384	2.29476	1.22085
3.32095	1.82052	2.29274	1.22239
3.32095	1.82246	2.29549	1.22261
3.32095	1.82409	2.29131	1.22199
3.32095	1.82134	2.28044	1.22127
3.32095	1.82242	2.28149	1.22191
3.32095	1.82232	2.27599	1.22255
3.32095	1.82263	2.26838	1.22116
3.32095	1.82669	2.27737	1.22097
3.32095	1.82384	2.28176	1.22082
3.32095	1.82366	2.2864	1.22191
3.32095	1.82287	2.28754	1.22065
3.32095	1.82226	2.28996	1.22183
3.32095	1.82325	2.28496	1.22147
3.32095	1.82415	2.29077	1.22233
3.32095	1.82171	2.28393	1.22279
3.32095	1.81936	2.28695	1.22318
3.32095	1.81712	2.2883	1.22337
3.32095	1.81811	2.29043	1.22184
3.32095	1.81804	2.28765	1.22239
3.32095	1.81975	2.28958	1.22239
3.32095	1.8212	2.28625	1.22245
3.32095	1.82175	2.27974	1.22336
3.32095	1.82506	2.27691	1.22194
3.32095	1.82501	2.28215	1.2225
3.32095	1.82389	2.28499	1.22139
3.32095	1.82474	2.28946	1.22116
3.32095	1.8253	2.28019	1.22207
3.32095	1.82246	2.27368	1.22226
3.32095	1.82189	2.28386	1.22219
3.32095	1.82336	2.27928	1.22164
3.32095	1.82371	2.26881	1.22136
3.32095	1.82336	2.27216	1.2222
3.32095	1.82356	2.26958	1.22147
3.32095	1.8223	2.27158	1.22125
3.32095	1.82196	2.28278	1.22308
3.32095	1.82042	2.27634	1.22195
3.32095	1.82301	2.27779	1.22161
3.32095	1.82474	2.27919	1.22179
3.32095	1.82517	2.27902	1.22241
3.32095	1.8246	2.2729	1.2225
3.32095	1.82254	2.27036	1.22218
3.32095	1.82437	2.26951	1.22304
3.32095	1.82124	2.2787	1.22331
3.32095	1.82156	2.27044	1.22253
3.32095	1.82168	2.27976	1.22202
3.32095	1.81861	2.28001	1.22252
3.32095	1.82109	2.27992	1.22214
3.32095	1.82378	2.28392	1.2215
3.32095	1.82589	2.28285	1.22293
3.32095	1.82624	2.28349	1.2224
3.32095	1.82746	2.28643	1.22332
3.32095	1.82751	2.28461	1.22342
3.32095	1.82598	2.28293	1.22321
3.32095	1.82612	2.284	1.22281
3.32095	1.82292	2.28674	1.22228
3.32095	1.82629	2.28437	1.22279
3.32095	1.82115	2.28441	1.22219
3.32095	1.82103	2.28705	1.22234
3.32095	1.82234	2.29023	1.22174
3.32095	1.82199	2.29132	1.22299
3.32095	1.82226	2.28873	1.22226
3.32095	1.82236	2.28861	1.22206
3.32095	1.82517	2.28524	1.22196
3.32095	1.82367	2.28574	1.22206
3.32095	1.82446	2.27353	1.22217
3.32095	1.82344	2.27687	1.22226
3.32095	1.82495	2.27402	1.22084
3.32095	1.8252	2.27011	1.22249
3.32095	1.82281	2.2679	1.22269
3.32095	1.82368	2.27667	1.22152
3.32095	1.82291	2.28102	1.2215
3.32095	1.82181	2.29142	1.22242
3.32095	1.8238	2.28431	1.22225
3.32095	1.82299	2.27759	1.22204
3.32095	1.82197	2.29133	1.22193
3.32095	1.82181	2.28444	1.22177
3.32095	1.82239	2.28451	1.22221
3.32095	1.82133	2.28956	1.22297
3.32095	1.82021	2.28089	1.22216
3.32095	1.82108	2.2845	1.22197
3.32095	1.81973	2.29123	1.2232
3.32095	1.81945	2.28864	1.22197
3.32095	1.82236	2.28398	1.22243
3.32095	1.82102	2.28156	1.22245
3.32095	1.82062	2.28635	1.22412
3.32095	1.82045	2.2888	1.22409
3.32095	1.82232	2.28642	1.2235
3.32095	1.81955	2.28626	1.22295
3.32095	1.82167	2.2899	1.22298
3.32095	1.82484	2.28713	1.2224
3.32095	1.82287	2.2885	1.22264
3.32095	1.82448	2.28101	1.22393
3.32095	1.82256	2.28209	1.22312
3.32095	1.82189	2.28186	1.22296
3.32095	1.82208	2.27843	1.22297
3.32095	1.82165	2.27688	1.22266
3.32095	1.82359	2.27971	1.22305
3.32095	1.82098	2.27645	1.22323
3.32095	1.81992	2.28288	1.22315
3.32095	1.8207	2.28325	1.22285
3.32095	1.82517	2.28457	1.22301
3.32095	1.82565	2.27589	1.22267
3.32095	1.82135	2.27618	1.22276
3.32095	1.81968	2.27161	1.2222
3.32095	1.82265	2.27593	1.22206
3.32095	1.82106	2.28185	1.22319
3.32095	1.81835	2.27068	1.22268
3.32095	1.82099	2.27578	1.22238
3.32095	1.82006	2.28289	1.22189
3.32095	1.81864	2.28966	1.22304
3.32095	1.81898	2.27823	1.22206
3.32095	1.82142	2.27586	1.22253
3.32095	1.82233	2.28386	1.22201
3.32095	1.82111	2.27627	1.22273
3.32095	1.82297	2.27367	1.22256
3.32095	1.82224	2.27775	1.22261
3.32095	1.82252	2.28432	1.22265
3.32095	1.82317	2.27575	1.22276
3.32095	1.82078	2.2773	1.22318
3.32095	1.82004	2.28135	1.22292
3.32095	1.82079	2.27626	1.22326
3.32095	1.82125	2.27404	1.22312
3.32095	1.82191	2.27332	1.22295
3.32095	1.8208	2.28185	1.22236
3.32095	1.82318	2.27912	1.22391
3.32095	1.82414	2.27042	1.2227
3.32095	1.82529	2.28048	1.2223
3.32095	1.82433	2.27146	1.22194
3.32095	1.82146	2.26962	1.2222
3.32095	1.81957	2.28068	1.22247
3.32095	1.82084	2.27714	1.22274
3.32095	1.81666	2.27583	1.22407
3.32095	1.81866	2.28304	1.22317
3.32095	1.81741	2.2821	1.22383
3.32095	1.81883	2.27757	1.2229
3.32095	1.81913	2.28692	1.22319
3.32095	1.82189	2.29029	1.22435
3.32095	1.82226	2.28789	1.2241
3.32095	1.82445	2.29497	1.22282
3.32095	1.82561	2.29042	1.2216
3.32095	1.82494	2.2913	1.22146
3.32095	1.82315	2.28969	1.22173
3.32095	1.82259	2.2829	1.22309
3.32095	1.82143	2.28143	1.22277
3.32095	1.81864	2.27931	1.22384
3.32095	1.81835	2.27577	1.22415
3.32095	1.82142	2.28362	1.22354
3.32095	1.82099	2.29243	1.22312
3.32095	1.82321	2.28105	1.22353
3.32095	1.82409	2.28109	1.22258
3.32095	1.82223	2.28362	1.22216
3.32095	1.82325	2.28297	1.22285
3.32095	1.82218	2.28523	1.22349
3.32095	1.82117	2.28063	1.22221
3.32095	1.82154	2.27874	1.22376
3.32096	1.82114	2.28053	1.224
3.32091	1.82135	2.28906	1.22384
3.32106	1.8245	2.2875	1.22367
3.32067	1.82309	2.28531	1.22358
3.3215	1.82428	2.28773	1.22357
3.31967	1.8241	2.28491	1.22356
3.32901	1.82309	2.28435	1.22343
3.32622	1.82399	2.29267	1.22441
3.32343	1.82296	2.28695	1.22425
3.33009	1.82187	2.30224	1.22223
3.33029	1.82172	2.28592	1.22262
3.32999	1.8212	2.28456	1.22353
3.33811	1.82227	2.28899	1.22219
3.32807	1.81901	2.28845	1.22351
3.33078	1.82118	2.29486	1.22301
3.33132	1.82071	2.29103	1.22307
3.32502	1.82051	2.29589	1.2227
3.32827	1.82041	2.29026	1.22283
3.33404	1.82231	2.28172	1.22213
3.3386	1.82181	2.27485	1.2215
3.34323	1.82188	2.28249	1.22332
3.34153	1.81871	2.28675	1.22516
3.33821	1.82176	2.29111	1.22396
3.34653	1.8209	2.29224	1.23175
3.33339	1.81945	2.28901	1.22662
3.33996	1.81951	2.2919	1.22989
3.3326	1.82092	2.29469	1.21921
3.34593	1.82072	2.28908	1.22674
3.33877	1.81926	2.2957	1.2231
3.32769	1.82251	2.2977	1.21478
3.32106	1.82473	2.2904	1.21664
3.32669	1.82307	2.28582	1.20911
3.33094	1.82361	2.27897	1.21676
3.33802	1.82392	2.27623	1.2305
3.33523	1.82226	2.27536	1.22694
3.3376	1.82285	2.28435	1.22529
3.34579	1.82515	2.28692	1.22836
3.34114	1.82321	2.29209	1.23221
3.33104	1.82396	2.29446	1.22705
3.331	1.8234	2.29652	1.22217
3.33412	1.8228	2.28899	1.22277
3.33314	1.82093	2.29916	1.21393
3.33367	1.82045	2.29843	1.2158
3.33647	1.81918	2.28113	1.2127
3.34237	1.81899	2.28529	1.22904
3.33384	1.82094	2.28778	1.22414
3.33074	1.81829	2.28102	1.22124
3.33857	1.81895	2.27214	1.23104
3.33637	1.82216	2.27025	1.22761
3.34323	1.8242	2.28827	1.22624
3.342	1.82591	2.27698	1.22696
3.33301	1.82637	2.27606	1.22882
3.33772	1.82543	2.28207	1.22579
3.33554	1.82142	2.28333	1.21905
3.34015	1.8201	2.27697	1.2262
3.3408	1.81933	2.2761	1.22209
3.34363	1.82157	2.27866	1.21923
3.34448	1.82181	2.27584	1.2283
3.34808	1.8213	2.28089	1.22504
3.34869	1.82268	2.27846	1.22833
3.34319	1.82192	2.28159	1.22755
3.3397	1.82194	2.28741	1.22697
3.34441	1.82283	2.27452	1.22641
3.32835	1.82406	2.27512	1.21658
3.33322	1.82238	2.28311	1.22118
3.333	1.8231	2.28705	1.22082
3.33361	1.82574	2.27781	1.22
3.3355	1.8235	2.28466	1.22
3.33524	1.8226	2.29707	1.22175
3.33834	1.82393	2.29813	1.21729
3.33941	1.82406	2.29051	1.22112
3.33189	1.82053	2.29111	1.22746
3.33265	1.821	2.28947	1.22094
3.33611	1.82084	2.28462	1.2291
3.3321	1.82099	2.28857	1.22639
3.33243	1.82153	2.29017	1.2364
3.33575	1.82393	2.28625	1.23818
3.33092	1.82477	2.28692	1.23533
3.32735	1.82256	2.28372	1.23271
3.34687	1.82067	2.28586	1.2258
3.34838	1.82273	2.28519	1.23538
3.34597	1.82329	2.27929	1.23284
3.34547	1.82166	2.29074	1.22834
3.34308	1.82102	2.28655	1.2313
3.34422	1.82073	2.27632	1.2293
3.33862	1.81907	2.27246	1.21999
3.34072	1.81875	2.2735	1.21959
3.34109	1.81861	2.26857	1.21873
3.34057	1.81777	2.27371	1.22453
3.33463	1.81767	2.27705	1.22527
3.33839	1.82276	2.27261	1.22607
3.3306	1.82303	2.27168	1.2216
3.33611	1.82216	2.26524	1.225
3.34101	1.82351	2.27726	1.21949
3.33578	1.82481	2.28248	1.21135
3.33473	1.82277	2.27742	1.21197
3.33966	1.82322	2.2767	1.22207
3.33154	1.81913	2.25959	1.22683
3.32505	1.82066	2.26769	1.21814
3.33517	1.82211	2.26587	1.2261
3.33771	1.82132	2.27336	1.23588
3.32739	1.81894	2.27499	1.22159
3.33437	1.82036	2.27534	1.22631
3.3288	1.82364	2.27933	1.23424
3.33289	1.82229	2.27899	1.22723
3.33317	1.82207	2.28172	1.22533
3.33527	1.82353	2.29453	1.22361
3.33532	1.82324	2.29559	1.2214
3.33313	1.82111	2.29129	1.2294
3.33952	1.81854	2.29404	1.22755
3.33358	1.81974	2.30105	1.22381
3.3374	1.81769	2.29516	1.22861
3.33019	1.81921	2.28292	1.21778
3.33216	1.8223	2.28924	1.2177
3.34216	1.82319	2.29747	1.22823
3.34762	1.82532	2.29964	1.22852
3.34103	1.82274	2.29262	1.23143
3.3399	1.82199	2.29181	1.23492
3.34271	1.8214	2.28318	1.22514
3.33183	1.8236	2.27784	1.21878
3.3339	1.82065	2.28537	1.22103
3.33788	1.82031	2.29496	1.22528
3.3374	1.82381	2.2895	1.22329
3.33979	1.82098	2.28538	1.23511
3.33301	1.81901	2.29021	1.23094
3.32713	1.81878	2.28037	1.22643
3.33052	1.82022	2.28066	1.22355
3.33855	1.8195	2.29041	1.22021
3.33701	1.81589	2.28888	1.22201
3.3336	1.81781	2.28399	1.22212
3.3346	1.81889	2.28794	1.22049
3.32645	1.8195	2.29412	1.21847
3.33198	1.82149	2.28618	1.22084
3.33529	1.82213	2.28572	1.22399
3.33587	1.8206	2.28451	1.22399
3.32818	1.82184	2.27966	1.22871
3.32631	1.82096	2.27963	1.22514
3.33581	1.82166	2.2719	1.22372
3.33622	1.82167	2.27109	1.22146
3.34139	1.82149	2.26945	1.21761
3.33595	1.82099	2.27568	1.21771
3.33497	1.82042	2.27636	1.21898
3.33263	1.82194	2.2689	1.21433
3.3347	1.82492	2.27144	1.21936
3.33624	1.82224	2.27214	1.22039
3.33788	1.82397	2.27172	1.21651
3.34243	1.8222	2.27459	1.21717
3.33785	1.82188	2.27972	1.2211
3.33853	1.82281	2.28646	1.2179
3.33553	1.8189	2.29187	1.2146
3.33631	1.82969	2.29391	1.21044
3.3346	1.83346	2.28503	1.21221
3.34222	1.82311	2.28755	1.20901
3.34082	1.82847	2.29637	1.21084
3.34651	1.84184	2.28679	1.2185
3.34301	1.83429	2.28643	1.21891
3.34513	1.82947	2.29713	1.22129
3.34278	1.82751	2.29881	1.2164
3.33968	1.83067	2.30409	1.224
3.33826	1.82268	2.30361	1.22267
3.33717	1.81811	2.30016	1.2177
3.33532	1.81641	2.29584	1.21511
3.34009	1.82086	2.2965	1.214
3.33557	1.82353	2.30087	1.21601
3.33415	1.82652	2.28397	1.21652
3.34095	1.82451	2.28443	1.20765
3.34087	1.82303	2.29124	1.22275
3.33876	1.82102	2.28802	1.22123
3.34142	1.82055	2.28641	1.21966
3.33713	1.81801	2.28097	1.22802
3.34031	1.81597	2.27435	1.22112
3.34409	1.82162	2.28031	1.22685
3.33873	1.81114	2.28722	1.22785
3.33754	1.81336	2.28087	1.23179
3.33903	1.81875	2.2922	1.23443
3.3344	1.8116	2.29616	1.22596
3.33368	1.81748	2.28507	1.22902
3.33448	1.82537	2.28072	1.23074
3.33677	1.83051	2.28118	1.23031
3.33803	1.8241	2.27948	1.22917
3.33429	1.81865	2.28405	1.23447
3.33832	1.81896	2.2752	1.23315
3.34427	1.81927	2.28219	1.22202
3.34631	1.82596	2.28105	1.23062
3.33179	1.82062	2.27442	1.22448
3.33006	1.82591	2.27884	1.22717
3.3306	1.8273	2.2707	1.21725
3.33272	1.82797	2.28015	1.22296
3.34268	1.82734	2.27792	1.23398
3.32882	1.82737	2.28314	1.22819
3.33198	1.82418	2.27663	1.22224
3.33781	1.82436	2.27238	1.22177
3.34041	1.83064	2.28648	1.23335
3.34577	1.8285	2.2903	1.22515
3.34649	1.83626	2.29019	1.2309
3.3431	1.83775	2.29875	1.21573
3.34748	1.8366	2.29353	1.21693
3.34574	1.82875	2.28671	1.22974
3.34901	1.82521	2.29726	1.23002
3.35173	1.82775	2.29988	1.23038
3.33913	1.82234	2.29757	1.23255
3.33973	1.83297	2.29939	1.22888
3.33091	1.82949	2.29848	1.23823
3.32723	1.83501	2.295	1.23743
3.33602	1.83772	2.29094	1.2336
3.3253	1.83299	2.29992	1.23831
3.33299	1.82932	2.29434	1.23805
3.33205	1.82621	2.2824	1.23738
3.32653	1.82686	2.28864	1.2226
3.34159	1.81726	2.29278	1.21933
3.34137	1.82912	2.29133	1.22591
3.34449	1.82898	2.29453	1.2196
3.35089	1.83084	2.30458	1.22186
3.34114	1.83203	2.3016	1.22639
3.35149	1.84059	2.29833	1.23305
3.3405	1.82968	2.2913	1.23639
3.34102	1.82078	2.28799	1.22586
3.33344	1.82228	2.28376	1.22888
3.33047	1.82354	2.28525	1.22408
3.34178	1.82063	2.27424	1.21617
3.33665	1.81694	2.28215	1.21596
3.33732	1.81537	2.27221	1.20824
3.34209	1.82308	2.26818	1.20996
3.3429	1.81543	2.26858	1.22088
3.34141	1.82286	2.27331	1.22453
3.3405	1.83328	2.28034	1.22189
3.33605	1.82358	2.28404	1.22786
3.33778	1.82457	2.28295	1.22325
3.3365	1.82615	2.27187	1.22117
3.34458	1.82469	2.2693	1.21902
3.34029	1.83084	2.26917	1.22106
3.33977	1.82907	2.27074	1.23155
3.33437	1.82642	2.27049	1.2237
3.33611	1.82686	2.25552	1.23702
3.33759	1.82786	2.25866	1.22365
3.34313	1.82193	2.26216	1.22174
3.33942	1.82069	2.26999	1.22191
3.33645	1.82966	2.27157	1.22101
3.33646	1.82691	2.26771	1.228
3.33398	1.82423	2.27146	1.23638
3.33021	1.83754	2.27115	1.22935
3.33394	1.83754	2.28288	1.22791
3.33081	1.83798	2.28021	1.23297
3.33311	1.83505	2.27555	1.22214
3.33483	1.83541	2.27184	1.22494
3.33412	1.82945	2.27987	1.2251
3.32772	1.83263	2.27968	1.22083
3.33358	1.83033	2.28029	1.22067
3.32922	1.82608	2.2832	1.2203
3.32771	1.83121	2.28296	1.22305
3.34059	1.83725	2.28514	1.21974
3.33437	1.82664	2.28205	1.21843
3.33473	1.8181	2.29164	1.22217
3.33951	1.81886	2.29738	1.2242
3.32941	1.82096	2.29344	1.22123
3.34022	1.82118	2.29311	1.22245
3.3312	1.81562	2.28907	1.21775
3.33334	1.81595	2.2894	1.22605
3.3337	1.81731	2.27603	1.22628
3.33413	1.8123	2.27712	1.22411
3.32976	1.81507	2.28741	1.23359
3.33147	1.82121	2.28734	1.22715
3.33349	1.82583	2.2824	1.23119
3.33027	1.82189	2.28298	1.23209
3.34051	1.82217	2.27739	1.22586
3.33721	1.82434	2.28478	1.22949
3.34262	1.82058	2.29179	1.23022
3.33722	1.82403	2.29543	1.23632
3.33098	1.82091	2.28522	1.22382
3.33321	1.83099	2.2836	1.22846
3.32942	1.82523	2.28168	1.22779
3.33237	1.81758	2.27299	1.22894
3.33461	1.82646	2.26702	1.22456
3.33884	1.82366	2.26107	1.22609
3.3401	1.82773	2.2708	1.22913
3.34482	1.82997	2.26664	1.22935
3.33766	1.83341	2.26552	1.23094
3.33414	1.82562	2.28766	1.22754
3.33578	1.81602	2.28798	1.2295
3.3403	1.82568	2.26759	1.23039
3.33877	1.82428	2.2815	1.22885
3.33401	1.82012	2.27935	1.22258
3.33082	1.82066	2.27047	1.21494
3.33283	1.82988	2.26188	1.21792
3.33404	1.83525	2.2641	1.2237
3.33252	1.83145	2.27729	1.22343
3.33201	1.83068	2.27666	1.21923
3.33601	1.82683	2.27384	1.22465
3.34085	1.83339	2.2837	1.22647
3.33647	1.83271	2.28716	1.22922
3.33883	1.81911	2.28987	1.23346
3.34229	1.81366	2.28737	1.22875
3.34353	1.81206	2.2943	1.22807
3.34452	1.8136	2.30604	1.22811
3.34098	1.81381	2.29496	1.2226
3.33373	1.82142	2.28643	1.21441
3.33734	1.8282	2.29333	1.2184
3.33138	1.81521	2.29404	1.22244
3.3326	1.81964	2.29769	1.22401
3.34585	1.82234	2.29136	1.22832
3.33327	1.82969	2.2939	1.23107
3.34167	1.82486	2.28461	1.22792
3.34068	1.81664	2.29058	1.22796
3.34297	1.81926	2.29758	1.22659
3.3381	1.82603	2.3005	1.2302
3.33038	1.82501	2.30225	1.23504
3.33442	1.828	2.2934	1.22136
3.33838	1.83269	2.28717	1.22249
3.34098	1.8257	2.29006	1.22207
3.34243	1.83259	2.28291	1.22245
3.33934	1.83093	2.28343	1.21765
3.34221	1.8242	2.28118	1.21332
3.3458	1.8257	2.28415	1.22884
3.33742	1.81908	2.28618	1.22822
3.33787	1.82207	2.28367	1.22709
3.33932	1.81207	2.28566	1.22769
3.33975	1.8218	2.28459	1.22198
3.33837	1.82101	2.29008	1.22851
3.34195	1.82616	2.28877	1.22899
3.33564	1.83109	2.28967	1.22731
3.33257	1.83073	2.28431	1.22698
3.325	1.82736	2.28574	1.22619
3.3391	1.83244	2.27998	1.23213
3.334	1.83033	2.27518	1.22535
3.33585	1.82449	2.27869	1.22602
3.32899	1.82049	2.28021	1.22391
3.32782	1.82859	2.27852	1.23316
3.34397	1.83669	2.28108	1.23247
3.34569	1.82754	2.26922	1.22847
3.336	1.82346	2.26764	1.23593
3.33562	1.83437	2.26685	1.22709
3.33836	1.81771	2.26974	1.22168
3.33548	1.82086	2.27959	1.22078
3.33756	1.8391	2.28614	1.21735
3.3352	1.83213	2.28189	1.22174
3.32668	1.82834	2.27518	1.22111
3.32639	1.83021	2.27067	1.21495
3.33142	1.83987	2.2869	1.23001
3.34383	1.82535	2.28664	1.22416
3.3316	1.82641	2.29119	1.22396
3.32713	1.82303	2.29144	1.22478
3.33416	1.82795	2.28787	1.23314
3.32815	1.82593	2.28861	1.23518
3.33196	1.82969	2.28141	1.22755
3.32992	1.82578	2.28623	1.23661
3.34108	1.81944	2.28795	1.23095
3.33782	1.82079	2.27982	1.2323
3.32389	1.83381	2.28737	1.23269
3.33107	1.83015	2.28526	1.23524
3.32427	1.83168	2.28022	1.2275
3.32487	1.83542	2.28841	1.22896
3.33704	1.83657	2.28924	1.21705
3.33318	1.83614	2.28362	1.22134
3.33661	1.8339	2.28821	1.2201
3.33553	1.82999	2.28031	1.22225
3.33213	1.83525	2.27862	1.22226
3.33348	1.83558	2.28386	1.22536
3.32677	1.83139	2.29059	1.22109
3.32876	1.83319	2.28239	1.22811
3.3304	1.82492	2.27863	1.22231
3.32653	1.81997	2.28825	1.21921
3.33719	1.82798	2.28746	1.22173
3.33488	1.82915	2.27362	1.21956
3.3447	1.83328	2.264	1.22025
3.33983	1.83258	2.26172	1.21361
3.33744	1.84576	2.2717	1.22106
3.33169	1.84046	2.27029	1.22909
3.32374	1.83823	2.27738	1.22621
3.33333	1.83773	2.28115	1.2405
3.33254	1.83218	2.28268	1.23191
3.33167	1.82313	2.27423	1.22937
3.32823	1.82651	2.28208	1.22555
3.32692	1.83164	2.28035	1.21424
3.32441	1.83413	2.27647	1.23231
3.32534	1.83812	2.27951	1.22606
3.33204	1.82894	2.28803	1.2236
3.33078	1.82906	2.29009	1.22585
3.31576	1.82876	2.29483	1.23194
3.32685	1.83248	2.29407	1.22962
3.3299	1.82625	2.28239	1.22394
3.3331	1.82798	2.28246	1.22478
3.33892	1.83776	2.29301	1.22702
3.32643	1.82254	2.29506	1.23103
3.32633	1.83464	2.29314	1.22996
3.33459	1.83571	2.28478	1.22493
3.33547	1.82432	2.2867	1.22943
3.33482	1.82735	2.29174	1.22391
3.33711	1.82495	2.28828	1.22493
3.32826	1.82708	2.29196	1.22435
3.32754	1.82455	2.28706	1.22313
3.34114	1.8325	2.29299	1.21376
3.34399	1.83601	2.29458	1.22123
3.34138	1.83836	2.28517	1.23165
3.34514	1.82756	2.28749	1.22963
3.33797	1.83879	2.29678	1.22426
3.33507	1.83797	2.28721	1.22623
3.32906	1.83581	2.28252	1.22796
3.33631	1.83054	2.28977	1.23195
3.32964	1.83074	2.28975	1.2285
3.32866	1.8404	2.29564	1.23497
3.33499	1.82795	2.29465	1.22881
3.33018	1.83303	2.29406	1.23469
3.33674	1.84358	2.2768	1.2363
3.32162	1.84571	2.28698	1.22971
3.32681	1.84332	2.28384	1.22601
3.3197	1.8362	2.28319	1.2135
3.32099	1.8223	2.27827	1.22245
3.33532	1.82627	2.28794	1.22567
3.33661	1.82046	2.29105	1.22771
3.32437	1.82669	2.30152	1.23219
3.33009	1.83797	2.29706	1.23426
3.33875	1.82833	2.29739	1.22904
3.33454	1.82858	2.29528	1.2332
3.34667	1.82178	2.29726	1.24402
3.34164	1.82211	2.29743	1.23027
3.32943	1.81923	2.29225	1.2155
3.3336	1.81703	2.2845	1.21643
3.33316	1.81922	2.286	1.21042
3.33005	1.83023	2.28211	1.21348
3.33213	1.83018	2.28625	1.2254
3.34114	1.8295	2.28094	1.22526
3.33502	1.83271	2.27128	1.21916
3.34043	1.83221	2.27254	1.22847
3.34361	1.83285	2.27527	1.22911
3.33941	1.83756	2.27686	1.22882
3.34078	1.82515	2.28773	1.23019
3.33021	1.83368	2.28303	1.23364
3.33447	1.83187	2.28023	1.2358
3.33036	1.82939	2.27926	1.22295
3.32599	1.82905	2.2796	1.21435
3.33577	1.8282	2.27516	1.22046
3.33492	1.82272	2.27706	1.22404
3.33433	1.82881	2.27426	1.23084
3.34094	1.8256	2.27343	1.23143
3.34271	1.82515	2.27042	1.22734
3.34254	1.83607	2.27604	1.23202
3.33642	1.83104	2.28357	1.23245
3.34154	1.82757	2.2831	1.22425
3.33144	1.84633	2.28554	1.22238
3.33523	1.84347	2.289	1.23243
3.3433	1.8371	2.28734	1.2197
3.3298	1.83935	2.28604	1.21669
3.33209	1.82884	2.28115	1.22355
3.34148	1.83027	2.28146	1.22825
3.33676	1.82514	2.28938	1.22653
3.33163	1.8308	2.28682	1.22063
3.32922	1.83731	2.2828	1.23515
3.33115	1.82731	2.28331	1.22885
3.32878	1.82642	2.28897	1.22322
3.34029	1.82333	2.29393	1.22709
3.34483	1.82117	2.28781	1.2227
3.34184	1.82793	2.28815	1.22666
3.33771	1.83811	2.28758	1.2185
3.34749	1.83081	2.2788	1.21263
3.34539	1.83844	2.28921	1.21056
3.35143	1.84268	2.28126	1.22447
3.35165	1.82905	2.26876	1.22086
3.34714	1.82378	2.27296	1.22766
3.34318	1.82163	2.2782	1.23123
3.33426	1.8293	2.28218	1.22672
3.33581	1.83193	2.28066	1.2274
3.34032	1.82707	2.27924	1.22493
3.33623	1.82694	2.28233	1.22538
3.33553	1.83118	2.28807	1.22267
3.32474	1.83258	2.28772	1.22784
3.33226	1.828	2.28387	1.22766
3.33481	1.83237	2.28255	1.2331
3.3253	1.83773	2.27862	1.24131
3.32423	1.83062	2.27737	1.23521
3.33216	1.8317	2.27533	1.21752
3.33413	1.83252	2.28308	1.21703
3.32066	1.83405	2.28718	1.22653
3.32671	1.83239	2.288	1.22099
3.34459	1.83462	2.29373	1.22572
3.33065	1.82901	2.28847	1.21901
3.33525	1.82721	2.2902	1.22027
3.3357	1.82147	2.29009	1.21859
3.3364	1.8288	2.29954	1.21693
3.34093	1.83283	2.3007	1.22082
3.34229	1.83721	2.29051	1.22316
3.33736	1.83219	2.28479	1.23272
3.33708	1.82668	2.28731	1.23278
3.34044	1.83099	2.28564	1.22802
3.33672	1.82663	2.29577	1.22087
3.33758	1.82781	2.29723	1.23139
3.33268	1.83135	2.28779	1.22401
3.33776	1.83678	2.2818	1.22232
3.33126	1.83104	2.28036	1.22702
3.33474	1.84869	2.27515	1.22236
3.34634	1.83145	2.2744	1.21922
3.34216	1.8353	2.27452	1.22022
3.33595	1.84595	2.27413	1.22584
3.33623	1.83651	2.27091	1.22999
3.33053	1.83574	2.27715	1.22957
3.33536	1.8412	2.27766	1.22374
3.34214	1.83095	2.27865	1.21797
3.34002	1.83234	2.27685	1.22702
3.33655	1.8318	2.2727	1.22848
3.34432	1.82897	2.28037	1.2047
3.3453	1.82476	2.28724	1.21848
3.33329	1.82358	2.277	1.22904
3.33474	1.84155	2.2636	1.21783
3.32434	1.82703	2.27667	1.20753
3.33261	1.82636	2.27809	1.2122
3.33082	1.83796	2.27967	1.21814
3.33967	1.82457	2.28794	1.20523
3.33423	1.84353	2.28795	1.20837
3.34421	1.84202	2.28367	1.21273
3.333	1.83814	2.28574	1.21087
3.3313	1.83499	2.28631	1.20526
3.33132	1.82757	2.2958	1.2031
3.33265	1.82537	2.29293	1.21791
3.32987	1.83717	2.28738	1.22646
3.33649	1.83399	2.28651	1.21749
3.33605	1.82721	2.29329	1.21634
3.33958	1.82745	2.29328	1.21868
3.33453	1.83074	2.29448	1.20616
3.33116	1.83045	2.29224	1.21216
3.34104	1.83246	2.29592	1.21368
3.33192	1.8275	2.29804	1.22512
3.33732	1.83199	2.28566	1.23029
3.33025	1.8397	2.28321	1.22218
3.33572	1.83798	2.29628	1.22217
3.33118	1.83772	2.29396	1.22213
3.33363	1.83426	2.28328	1.21358
3.34061	1.8368	2.29167	1.21427
3.33742	1.8337	2.29334	1.20734
3.33622	1.82835	2.29032	1.20869
3.34112	1.83606	2.29064	1.20622
3.34512	1.84138	2.28906	1.20394
3.33691	1.82392	2.28825	1.20406
3.33575	1.82797	2.29035	1.21443
3.34903	1.82752	2.29168	1.21098
3.33962	1.82666	2.28866	1.21204
3.33262	1.84042	2.28784	1.2143
3.33107	1.84455	2.28731	1.22014
3.33432	1.83526	2.2864	1.2262
3.32514	1.83756	2.29364	1.21225
3.32587	1.83439	2.29425	1.22167
3.33091	1.8338	2.28828	1.21442
3.33969	1.83212	2.28962	1.21548
3.33059	1.83732	2.29367	1.21377
3.3224	1.82677	2.296	1.20877
3.3319	1.83228	2.296	1.20788
3.3265	1.83936	2.29037	1.20539
3.32739	1.83448	2.28305	1.19238
3.33452	1.83025	2.28687	1.20149
3.33247	1.81828	2.27714	1.19542
3.33118	1.82931	2.27981	1.2121
3.33418	1.82365	2.28949	1.22302
3.32649	1.81905	2.28758	1.21287
3.33032	1.82509	2.28967	1.20391
3.3422	1.82587	2.29398	1.21546
3.33853	1.81859	2.29272	1.206
3.33376	1.8306	2.28953	1.21461
3.32675	1.82182	2.28662	1.22594
3.32248	1.83139	2.28613	1.2356
3.32349	1.82503	2.27908	1.2363
3.3173	1.82612	2.2843	1.21621
3.32087	1.82805	2.28836	1.20372
3.33077	1.82365	2.28624	1.21491
3.32506	1.81754	2.29402	1.20505
3.32495	1.82197	2.29741	1.19903
3.33778	1.82388	2.28779	1.20265
3.34449	1.83524	2.29891	1.21069
3.32888	1.83343	2.28811	1.21767
3.32433	1.82516	2.28834	1.22358
3.33814	1.82974	2.293	1.20989
3.32462	1.83933	2.29758	1.22152
3.3316	1.83615	2.29315	1.21722
3.3293	1.82323	2.29902	1.21255
3.33377	1.83042	2.28983	1.21278
3.33571	1.83747	2.29438	1.19499
3.33612	1.83751	2.29431	1.19726
3.34277	1.83515	2.28689	1.20419
3.33913	1.83107	2.28068	1.19628
3.33838	1.83488	2.28125	1.21826
3.33221	1.82313	2.27117	1.20909
3.33938	1.83064	2.27238	1.21458
3.33583	1.83001	2.27738	1.21137
3.33706	1.8288	2.28472	1.2214
3.33983	1.83406	2.281	1.22667
3.32979	1.81514	2.29172	1.21727
3.32933	1.82239	2.2833	1.22436
3.33403	1.83272	2.27312	1.22414
3.33849	1.83516	2.27206	1.23302
3.33452	1.83387	2.28288	1.21659
3.33438	1.83343	2.27768	1.19953
3.33962	1.83027	2.25676	1.21319
3.33458	1.81703	2.27561	1.20974
3.34135	1.83672	2.27239	1.21768
3.33982	1.83456	2.26386	1.23411
3.34945	1.83419	2.26709	1.22454
3.33958	1.83771	2.26665	1.23781
3.33745	1.83628	2.27175	1.2317
3.33065	1.82859	2.26958	1.20492
3.32828	1.82254	2.2816	1.2088
3.34131	1.84076	2.27126	1.20027
3.33178	1.83031	2.27155	1.20895
3.33381	1.83282	2.27027	1.2092
3.32684	1.82329	2.28593	1.22645
3.32825	1.82418	2.28966	1.22034
3.33704	1.82365	2.29007	1.21377
3.33017	1.81515	2.29086	1.2162
3.34061	1.80852	2.27791	1.20905
3.3346	1.82177	2.29567	1.21974
3.33366	1.83241	2.28959	1.21576
3.33094	1.83676	2.28314	1.20405
3.33096	1.84316	2.27763	1.22453
3.32913	1.83242	2.27546	1.22876
3.32811	1.83478	2.28101	1.22028
3.3362	1.82788	2.28287	1.21417
3.33269	1.81382	2.28703	1.21443
3.33713	1.81359	2.28185	1.21452
3.33597	1.82169	2.28646	1.21887
3.34115	1.81119	2.27945	1.23075
3.34221	1.82515	2.27666	1.21489
3.33424	1.83236	2.27889	1.20281
3.33575	1.83508	2.28872	1.22916
3.33999	1.8321	2.2874	1.23239
3.34432	1.83157	2.28511	1.22619
3.33319	1.83868	2.28287	1.22463
3.33585	1.82898	2.29012	1.22673
3.33093	1.82355	2.28211	1.22907
3.34062	1.82956	2.28226	1.22155
3.34551	1.8324	2.28506	1.23095
3.33592	1.81939	2.28386	1.21339
3.3454	1.82226	2.28321	1.23243
3.33824	1.82978	2.28529	1.21365
3.33562	1.83672	2.27727	1.20348
3.33294	1.8205	2.27362	1.21303
3.32998	1.82758	2.28279	1.20092
3.33487	1.8244	2.27613	1.19709
3.32812	1.8296	2.27279	1.21538
3.32481	1.82271	2.28271	1.23178
3.32827	1.82436	2.27171	1.20404
3.32879	1.81783	2.2691	1.21586
3.33511	1.82682	2.27552	1.23442
3.34315	1.83157	2.28232	1.22108
3.32823	1.82609	2.28979	1.21395
3.33578	1.81396	2.28895	1.21325
3.34243	1.81631	2.28622	1.2196
3.33826	1.81073	2.29609	1.21663
3.335	1.81592	2.2983	1.21333
3.33703	1.82331	2.2879	1.1941
3.3315	1.8148	2.28544	1.21541
3.32637	1.81938	2.27911	1.21784
3.33845	1.83118	2.28346	1.20228
3.33833	1.8288	2.28517	1.21104
3.34731	1.8226	2.28445	1.21434
3.34624	1.8187	2.27847	1.20541
3.33698	1.82767	2.27516	1.21885
3.34132	1.82596	2.2735	1.2254
3.32997	1.82549	2.2764	1.2127
3.33582	1.81981	2.27578	1.20896
3.33869	1.81071	2.28912	1.21887
3.33008	1.82296	2.28123	1.22183
3.32952	1.81855	2.2775	1.20924
3.33613	1.8322	2.2792	1.20429
3.33456	1.82535	2.2746	1.20846
3.33868	1.824	2.27728	1.19692
3.33215	1.82435	2.2809	1.20749
3.33788	1.82393	2.28142	1.2134
3.32936	1.83635	2.27985	1.21204
3.32839	1.8269	2.27282	1.21837
3.32829	1.83581	2.27447	1.21793
3.32413	1.81073	2.28035	1.21315
3.32074	1.82029	2.28268	1.22217
3.3232	1.8143	2.28201	1.21724
3.33495	1.81491	2.28447	1.21402
3.33357	1.83254	2.28602	1.21994
3.33071	1.82844	2.2865	1.22027
3.33548	1.829	2.29036	1.22232
3.3386	1.82837	2.28315	1.20866
3.3372	1.82599	2.28383	1.21433
3.32845	1.82131	2.28584	1.21777
3.32427	1.81548	2.28623	1.22551
3.32133	1.82198	2.28722	1.24937
3.33074	1.82179	2.28871	1.21334
3.33022	1.82348	2.2923	1.22402
3.32798	1.81703	2.29513	1.22609
3.34015	1.82276	2.29549	1.22304
3.32754	1.81615	2.2883	1.20892
3.32219	1.81881	2.29337	1.2074
3.32251	1.82282	2.30381	1.20708
3.32901	1.82495	2.30213	1.21159
3.32466	1.82469	2.29142	1.21886
3.329	1.8228	2.30492	1.22023
3.33616	1.8272	2.29697	1.21164
3.32852	1.82051	2.29172	1.2158
3.32781	1.82343	2.28668	1.21751
3.33333	1.81732	2.28845	1.20782
3.34058	1.81818	2.28562	1.20741
3.33917	1.8218	2.28605	1.21799
3.34032	1.814	2.28373	1.22347
3.34165	1.8104	2.28917	1.22185
3.3429	1.81607	2.27847	1.2245
3.34123	1.80517	2.27615	1.21777
3.33931	1.80882	2.29187	1.20636
3.34318	1.81302	2.29901	1.20481
3.33481	1.81678	2.28308	1.20221
3.33198	1.81985	2.28076	1.20649
3.32892	1.81608	2.27992	1.20775
3.33746	1.82119	2.28102	1.20971
3.32957	1.81899	2.29391	1.21535
3.32899	1.82862	2.28566	1.22168
3.32955	1.8253	2.2795	1.21886
3.33434	1.82599	2.28136	1.23472
3.33737	1.82372	2.27624	1.22699
3.33422	1.82239	2.28995	1.21153
3.32976	1.81942	2.28835	1.20068
3.33474	1.8239	2.28634	1.20096
3.33541	1.81213	2.29467	1.19145
3.33997	1.8214	2.29109	1.20511
3.34214	1.81758	2.27364	1.19892
3.35143	1.82003	2.28808	1.2061
3.34643	1.82366	2.2815	1.21146
3.33809	1.82838	2.27822	1.20553
3.32399	1.82966	2.2908	1.213
3.32486	1.82253	2.26657	1.22366
3.32872	1.8243	2.27414	1.2184
3.33141	1.82133	2.26991	1.2092
3.33386	1.82123	2.27453	1.22106
3.3292	1.82355	2.27767	1.21908
3.33552	1.8151	2.27798	1.20801
3.34245	1.81626	2.27265	1.21126
3.33567	1.82747	2.2691	1.20137
3.33464	1.82212	2.25544	1.20445
3.33087	1.82961	2.27471	1.19269
3.33271	1.83261	2.27948	1.20711
3.33164	1.83146	2.29399	1.21192
3.33579	1.83073	2.28378	1.21409
3.3307	1.82926	2.28751	1.21102
3.32855	1.815	2.29737	1.21544
3.33562	1.82607	2.29191	1.22
3.33251	1.83025	2.29047	1.21307
3.32433	1.81336	2.28242	1.21559
3.3365	1.81157	2.28393	1.21479
3.33674	1.8184	2.27851	1.2124
3.33558	1.80719	2.28372	1.20325
3.34403	1.81277	2.28293	1.19595
3.34033	1.80817	2.27881	1.2051
3.33014	1.81645	2.28051	1.19321
3.32879	1.81697	2.29493	1.20936
3.32795	1.81751	2.29931	1.19645
3.32944	1.82233	2.28893	1.20839
3.32687	1.81752	2.2903	1.22499
3.33139	1.82205	2.28499	1.21218
3.33059	1.81373	2.28729	1.21479
3.32682	1.82395	2.28348	1.2234
3.33461	1.81589	2.29379	1.2232
3.33341	1.791	2.28783	1.22599
3.32955	1.81729	2.28432	1.22886
3.33164	1.81856	2.27629	1.23142
3.33316	1.81183	2.27942	1.21831
3.33325	1.80852	2.27796	1.22303
3.33585	1.82159	2.26754	1.21281
3.32908	1.82606	2.28568	1.21574
3.32868	1.81388	2.29225	1.21934
3.32986	1.80971	2.28925	1.20694
3.33372	1.80908	2.28642	1.21059
3.33486	1.81877	2.28179	1.21542
3.33364	1.80531	2.29711	1.21959
3.3268	1.82098	2.28941	1.21913
3.32788	1.81382	2.2862	1.22865
3.33883	1.80964	2.29137	1.23617
3.33379	1.82076	2.28974	1.21703
3.33864	1.80816	2.27368	1.21047
3.32989	1.80933	2.28494	1.21505
3.33687	1.81713	2.29378	1.1914
3.34154	1.82344	2.29868	1.18172
3.33239	1.83741	2.29654	1.19704
3.33413	1.83248	2.26979	1.20509
3.32587	1.82907	2.28242	1.21028
3.33204	1.83502	2.27497	1.21916
3.33595	1.82313	2.28175	1.22256
3.32718	1.81944	2.28411	1.21009
3.33343	1.81798	2.29345	1.20666
3.33103	1.81223	2.29056	1.20989
3.33687	1.81914	2.28467	1.20819
3.33521	1.83076	2.28327	1.21091
3.33361	1.83508	2.28675	1.20067
3.34358	1.80913	2.30497	1.20328
3.33592	1.80289	2.29456	1.20781
3.33387	1.8113	2.29214	1.21575
3.33299	1.82629	2.29499	1.21063
3.32994	1.81181	2.29697	1.21073
3.33199	1.80924	2.30086	1.21298
3.33466	1.79723	2.28466	1.20342
3.33953	1.79898	2.28643	1.20686
3.33367	1.80115	2.29874	1.22007
3.331	1.81651	2.29399	1.21257
3.33055	1.82281	2.2783	1.20934
3.32713	1.80999	2.294	1.2188
3.33244	1.81889	2.30785	1.21695
3.33024	1.8243	2.32168	1.19586
3.32192	1.81772	2.3261	1.19678
3.32599	1.81799	2.32745	1.22768
3.32356	1.82315	2.32035	1.23529
3.32685	1.80535	2.28115	1.24407
3.31478	1.81011	2.27063	1.22916
3.3355	1.7955	2.28472	1.203
3.32859	1.77973	2.28881	1.20794
3.32303	1.80723	2.27059	1.21449
3.33788	1.80056	2.27229	1.20266
3.3435	1.80441	2.28248	1.19945
3.3474	1.81261	2.30719	1.22692
3.35533	1.80401	2.30368	1.22649
3.35661	1.82464	2.31211	1.21972
3.32359	1.81616	2.31809	1.21981
3.32138	1.82442	2.31945	1.22362
3.35143	1.79989	2.32998	1.22024
3.33992	1.78405	2.29924	1.21229
3.34598	1.79773	2.31101	1.20281
3.33884	1.79173	2.32359	1.20201
3.36034	1.81196	2.31453	1.21482
3.35788	1.81593	2.32765	1.20513
3.33697	1.80731	2.30294	1.1997
3.33192	1.81338	2.31731	1.20305
3.33235	1.8106	2.30505	1.20067
3.33278	1.82097	2.32384	1.19398
3.33474	1.80621	2.30555	1.19189
3.32591	1.80501	2.28772	1.19785
3.37103	1.8245	2.31338	1.19411
3.34954	1.82223	2.32597	1.19218
3.31601	1.82012	2.32015	1.19673
3.33096	1.81303	2.30346	1.20125
3.32383	1.80301	2.30087	1.19938
3.32205	1.79967	2.3023	1.19069
3.35105	1.80072	2.2923	1.20113
3.33395	1.82662	2.30571	1.20128
3.32484	1.82893	2.29194	1.22055
3.33077	1.82972	2.29629	1.21475
3.31327	1.80594	2.27991	1.20961
3.32374	1.82249	2.28193	1.22247
3.31896	1.81143	2.28576	1.22239
3.34253	1.81539	2.29366	1.20948
3.33155	1.80444	2.30598	1.20685
3.31958	1.80874	2.3132	1.21327
3.33855	1.80281	2.32887	1.21522
3.3388	1.81822	2.31572	1.20951
3.3349	1.81279	2.30394	1.21019
3.33168	1.80979	2.30365	1.21212
3.31623	1.8099	2.30869	1.21959
3.32088	1.81011	2.29832	1.2146
3.32108	1.80459	2.30661	1.21185
3.32688	1.80102	2.29565	1.21099
3.34261	1.80428	2.29797	1.21335
3.33011	1.81359	2.29082	1.20404
3.34851	1.80753	2.285	1.20989
3.35119	1.81693	2.29252	1.19443
3.35208	1.82187	2.30741	1.20337
3.34568	1.81756	2.3002	1.19737
3.33286	1.82261	2.28108	1.1933
3.33074	1.81062	2.2862	1.18738
3.34338	1.80395	2.29349	1.18892
3.34307	1.79918	2.28336	1.19682
3.34269	1.79844	2.29915	1.20022
3.32636	1.80114	2.27852	1.21872
3.33486	1.80738	2.27005	1.21574
3.33749	1.80582	2.28207	1.2245
3.33854	1.82645	2.27428	1.22163
3.349	1.82611	2.27403	1.23119
3.33454	1.82046	2.27486	1.23091
3.33606	1.82423	2.27361	1.22295
3.34517	1.81331	2.28384	1.22153
3.32444	1.81999	2.29488	1.22242
3.33733	1.82045	2.29593	1.21872
3.35072	1.8185	2.29504	1.21437
3.35533	1.81135	2.28908	1.2168
3.34468	1.81119	2.29397	1.20954
3.3398	1.81632	2.27814	1.21
3.3502	1.82301	2.29334	1.19561
3.34801	1.80984	2.3057	1.21228
3.34738	1.81931	2.30435	1.21148
3.33943	1.83645	2.29234	1.22012
3.3423	1.84292	2.29653	1.23691
3.34849	1.81955	2.30602	1.21569
3.341	1.81117	2.28698	1.21593
3.3434	1.80294	2.28701	1.21369
3.35646	1.81336	2.30213	1.21936
3.35357	1.83155	2.3007	1.1981
3.35915	1.81583	2.28034	1.21311
3.33701	1.81329	2.27703	1.22318
3.33714	1.79691	2.26994	1.20822
3.3422	1.81397	2.28264	1.21874
3.35084	1.82192	2.27439	1.21438
3.35289	1.82148	2.27709	1.21218
3.36341	1.82623	2.29245	1.21037
3.37588	1.83545	2.29236	1.21595
3.35509	1.8289	2.28607	1.206
3.35487	1.81352	2.28414	1.20092
3.34703	1.81562	2.29035	1.20299
3.34694	1.80766	2.28547	1.21815
3.34612	1.82038	2.29426	1.23099
3.36167	1.80793	2.29273	1.22782
3.33164	1.81034	2.29781	1.21816
3.32734	1.81495	2.28033	1.22511
3.34991	1.81358	2.27076	1.2238
3.36605	1.79845	2.29001	1.22988
3.34968	1.80686	2.28866	1.21141
3.35151	1.81896	2.27675	1.2193
3.3338	1.83531	2.28523	1.22008
3.33369	1.82452	2.27799	1.21532
3.3482	1.8097	2.28913	1.2182
3.33762	1.82028	2.28934	1.21406
3.33563	1.81642	2.27375	1.19767
3.32591	1.8119	2.28677	1.19584
3.33329	1.82658	2.28114	1.18856
3.33989	1.80996	2.28298	1.19726
3.33807	1.80838	2.25961	1.20227
3.31933	1.80504	2.27166	1.20203
3.31068	1.81756	2.27402	1.20515
3.32181	1.82574	2.28958	1.22102
3.33657	1.81694	2.32951	1.20772
3.33137	1.82768	2.30435	1.19862
3.32653	1.83263	2.30283	1.1995
3.33851	1.82593	2.29916	1.21767
3.33252	1.81955	2.28239	1.21832
3.31408	1.81227	2.27641	1.22394
3.32559	1.83056	2.28457	1.22785
3.32164	1.84014	2.27911	1.20758
3.32797	1.8198	2.27221	1.22385
3.33686	1.83276	2.28852	1.21403
3.34775	1.81914	2.28207	1.21533
3.34114	1.81647	2.28422	1.21527
3.35366	1.83621	2.29942	1.23563
3.34816	1.82204	2.28492	1.2256
3.35971	1.83076	2.25996	1.21605
3.35022	1.84118	2.25848	1.23149
3.3536	1.82203	2.23831	1.2066
3.34818	1.8297	2.2306	1.20531
3.34328	1.83458	2.24924	1.20481
3.34669	1.81484	2.27861	1.20566
3.33993	1.82613	2.25325	1.20547
3.36261	1.81785	2.25748	1.19914
3.34967	1.82158	2.25352	1.22919
3.35182	1.81981	2.23867	1.20114
3.33867	1.80474	2.22711	1.21006
3.34125	1.82943	2.25323	1.20303
3.34869	1.84314	2.25378	1.18244
3.34553	1.81434	2.27063	1.19202
3.33366	1.82054	2.27571	1.2026
3.3218	1.83728	2.2786	1.21632
3.31391	1.82785	2.29043	1.19986
3.32004	1.83312	2.27436	1.21082
3.32579	1.83418	2.28017	1.21787
3.33241	1.84425	2.28856	1.2134
3.34528	1.84788	2.29682	1.2287
3.34776	1.84574	2.2933	1.21452
3.35642	1.84463	2.28693	1.20557
3.33408	1.83996	2.29112	1.2117
3.33567	1.82481	2.27678	1.21068
3.32677	1.84048	2.28017	1.20361
3.34246	1.8421	2.29174	1.1982
3.34612	1.8456	2.28326	1.21288
3.32396	1.83661	2.25807	1.20394
3.32726	1.8437	2.25759	1.21462
3.32562	1.83589	2.26424	1.2142
3.33053	1.85529	2.28885	1.22208
3.32371	1.86259	2.28474	1.21817
3.3244	1.84753	2.27362	1.21652
3.32522	1.86037	2.29351	1.22381
3.32929	1.84019	2.28768	1.22577
3.33092	1.82106	2.28008	1.23695
3.32874	1.83318	2.27376	1.21889
3.33932	1.82511	2.26536	1.20773
3.34091	1.83081	2.26013	1.21466
3.34491	1.83077	2.27647	1.21461
3.33829	1.83621	2.26682	1.22991
3.33758	1.83797	2.28884	1.22501
3.33946	1.8291	2.29157	1.23026
3.35757	1.82293	2.28803	1.23209
3.34963	1.83189	2.29699	1.22606
3.33881	1.84623	2.28114	1.22221
3.3309	1.84654	2.28692	1.21766
3.34204	1.83529	2.28513	1.22189
3.33072	1.82256	2.28544	1.21001
3.35145	1.83626	2.27346	1.21179
3.34125	1.82551	2.26867	1.21254
3.35495	1.8261	2.27433	1.21715
3.34462	1.84667	2.26655	1.20643
3.33522	1.8284	2.28413	1.21689
3.33307	1.8401	2.29822	1.21855
3.35248	1.83975	2.29819	1.20957
3.34787	1.84722	2.29212	1.21945
3.33781	1.84116	2.29308	1.2389
3.32911	1.84202	2.26826	1.23754
3.34583	1.84093	2.28087	1.22048
3.33041	1.84281	2.29238	1.2149
3.33238	1.84601	2.26698	1.21478
3.32049	1.84545	2.26903	1.2091
3.32029	1.84288	2.28087	1.21885
3.3261	1.84146	2.2752	1.20583
3.32099	1.8489	2.26373	1.19554
3.32062	1.84717	2.27479	1.20898
3.34843	1.85525	2.27026	1.22616
3.33683	1.83714	2.26526	1.23278
3.32976	1.82357	2.29124	1.23299
3.34152	1.84738	2.31223	1.21825
3.32309	1.84311	2.30947	1.22401
3.33928	1.84423	2.30076	1.22002
3.33481	1.83455	2.3027	1.20393
3.32036	1.8243	2.30805	1.21593
3.33389	1.83674	2.29386	1.21608
3.33319	1.8347	2.30203	1.22716
3.34411	1.84174	2.28403	1.22591
3.34177	1.83082	2.28208	1.219
3.35234	1.8303	2.297	1.22046
3.33317	1.85348	2.30866	1.2192
3.35238	1.8191	2.29547	1.22144
3.34936	1.82022	2.28641	1.21486
3.3391	1.84432	2.27158	1.22583
3.35034	1.81358	2.2912	1.23181
3.32579	1.81852	2.28781	1.23558
3.34798	1.82514	2.27386	1.22618
3.33303	1.83472	2.27734	1.22565
3.3282	1.83923	2.27277	1.21668
3.33475	1.81996	2.26518	1.22402
3.33466	1.84131	2.26692	1.22115
3.33457	1.83637	2.25691	1.22099
3.3314	1.82577	2.25661	1.21672
3.33617	1.81789	2.26193	1.22565
3.33294	1.81157	2.28176	1.23524
3.32492	1.81155	2.29076	1.2433
3.30793	1.81339	2.28978	1.24105
3.31925	1.833	2.29954	1.24738
3.32278	1.83365	2.30018	1.22501
3.31426	1.81948	2.27349	1.21171
3.33045	1.83747	2.26949	1.22218
3.32677	1.83193	2.26053	1.20856
3.33037	1.83311	2.27401	1.21357
3.33155	1.83086	2.25817	1.21493
3.31526	1.82534	2.24801	1.21856
3.32048	1.82272	2.28678	1.20614
3.33127	1.82	2.29825	1.20652
3.34673	1.82039	2.28681	1.21641
3.33694	1.81397	2.30429	1.21805
3.33473	1.81763	2.29453	1.21249
3.33177	1.82594	2.2964	1.22256
3.34128	1.80847	2.33543	1.21818
3.33083	1.82208	2.33309	1.23317
3.34931	1.82434	2.31919	1.23951
3.33588	1.80911	2.3091	1.22026
3.35082	1.8122	2.31498	1.21773
3.34142	1.8136	2.28753	1.2152
3.34305	1.81832	2.26942	1.22375
3.34905	1.81398	2.27615	1.22937
3.34473	1.81499	2.30427	1.22684
3.33053	1.82239	2.29762	1.23969
3.32373	1.83625	2.30042	1.23172
3.34189	1.84757	2.28458	1.23227
3.33089	1.84064	2.31255	1.21455
3.3339	1.8489	2.33534	1.20768
3.33418	1.81777	2.32025	1.24118
3.33158	1.81535	2.31168	1.23485
3.33932	1.82368	2.31864	1.24567
3.34753	1.79314	2.30472	1.25446
3.35503	1.82955	2.33722	1.23793
3.34441	1.86254	2.33514	1.23766
3.32764	1.83633	2.33158	1.24033
3.3416	1.84527	2.31057	1.22009
3.35044	1.86697	2.30621	1.21599
3.34688	1.86512	2.30064	1.21954
3.34712	1.8546	2.28675	1.2227
3.33788	1.86732	2.27105	1.21135
3.34762	1.85815	2.26569	1.2351
3.37549	1.82807	2.27048	1.23238
3.35072	1.84333	2.29841	1.21239
3.33459	1.82589	2.2918	1.23055
3.38722	1.83927	2.27477	1.22396
3.34607	1.84008	2.29792	1.22071
3.34897	1.81708	2.30589	1.20599
3.35123	1.82913	2.30212	1.18341
3.34877	1.84144	2.29796	1.21445
3.32935	1.84407	2.29338	1.2237
3.3416	1.84759	2.28575	1.23731
3.35509	1.83469	2.28749	1.23126
3.33293	1.85746	2.30453	1.22862
3.35771	1.84122	2.2904	1.22411
3.36665	1.85577	2.29623	1.21488
3.35954	1.84197	2.27355	1.20366
3.34901	1.82599	2.26496	1.20644
3.33332	1.85032	2.30965	1.21082
3.36936	1.84049	2.32445	1.21822
3.3757	1.83895	2.31075	1.21346
3.35988	1.81687	2.29509	1.19951
3.34554	1.83463	2.2557	1.20421
3.35916	1.81421	2.26454	1.21102
3.32995	1.82308	2.26031	1.21745
3.36504	1.82806	2.28207	1.21597
3.36417	1.84885	2.27779	1.21698
3.36393	1.83	2.26946	1.22614
3.36886	1.83441	2.2889	1.22373
3.35091	1.82021	2.29523	1.21258
3.36198	1.82202	2.28724	1.19694
3.35543	1.86205	2.28731	1.2082
3.33912	1.82846	2.276	1.20309
3.3583	1.83377	2.26544	1.21906
3.35033	1.83349	2.26558	1.22118
3.33999	1.84112	2.26138	1.20855
3.34936	1.83581	2.30232	1.2278
3.33969	1.8577	2.28793	1.2189
3.36401	1.85572	2.30477	1.21051
3.36522	1.86928	2.30077	1.21007
3.3709	1.89368	2.28829	1.20819
3.36333	1.87946	2.28006	1.21263
3.36172	1.86657	2.30277	1.21882
3.35259	1.84162	2.30382	1.23246
3.34362	1.86518	2.29795	1.23008
3.35876	1.81859	2.28861	1.2147
3.3522	1.82454	2.28265	1.21295
3.37656	1.81744	2.2865	1.2058
3.35651	1.84687	2.27881	1.20055
3.36831	1.85375	2.29659	1.21822
3.35611	1.87243	2.3045	1.22479
3.3811	1.8316	2.30684	1.22341
3.34538	1.86172	2.28403	1.2282
3.36608	1.86257	2.27539	1.22755
3.37992	1.84975	2.27597	1.23491
3.35995	1.85309	2.25479	1.21866
3.36297	1.8454	2.27803	1.22637
3.34812	1.8351	2.25798	1.21407
3.35507	1.83452	2.23824	1.20835
3.36312	1.82613	2.24762	1.20647
3.37552	1.83086	2.25456	1.21962
3.37012	1.83499	2.26899	1.20446
3.34649	1.83336	2.26195	1.19885
3.32679	1.82726	2.27531	1.20594
3.32419	1.82523	2.28997	1.21392
3.32329	1.82625	2.28766	1.21682
3.33686	1.80229	2.25325	1.22194
3.31791	1.84741	2.24779	1.22195
3.33443	1.86019	2.23743	1.22142
3.3545	1.84711	2.24712	1.23352
3.34212	1.85925	2.28147	1.24256
3.31965	1.82626	2.27091	1.2283
3.29499	1.83823	2.2883	1.24079
3.32503	1.86532	2.23742	1.23442
3.317	1.83571	2.24408	1.23391
3.29863	1.80956	2.2932	1.22256
3.3159	1.79372	2.25568	1.23365
3.33353	1.82295	2.2617	1.20138
3.31913	1.82427	2.26184	1.19874
3.35042	1.82755	2.23997	1.20476
3.33471	1.84178	2.24232	1.23722
3.36583	1.82711	2.2425	1.22568
3.35988	1.82115	2.22829	1.23024
3.35466	1.86183	2.24158	1.23584
3.33706	1.83207	2.24855	1.23318
3.31206	1.85772	2.27411	1.22289
3.31349	1.86162	2.26237	1.22991
3.32687	1.82665	2.2385	1.24627
3.33313	1.86053	2.27526	1.22768
3.34845	1.86368	2.26379	1.22975
3.34655	1.84016	2.28174	1.2297
3.3597	1.83458	2.27153	1.22212
3.35824	1.84908	2.26779	1.21714
3.36443	1.86088	2.28525	1.24299
3.37233	1.84008	2.29411	1.24216
3.35702	1.8586	2.27378	1.2369
3.34655	1.84788	2.26108	1.23438
3.3494	1.85484	2.26034	1.23386
3.37909	1.86838	2.28311	1.23076
3.35996	1.84185	2.30719	1.20211
3.34061	1.82532	2.29436	1.19499
3.35988	1.87758	2.31755	1.20061
3.34161	1.84225	2.28717	1.2054
3.33255	1.84781	2.30082	1.22051
3.35304	1.84859	2.31349	1.20284
3.35676	1.83523	2.28367	1.20295
3.34326	1.87313	2.27195	1.23416
3.34913	1.86983	2.29683	1.23949
3.32998	1.85352	2.27652	1.23084
3.33657	1.85825	2.27722	1.22704
3.33691	1.84433	2.25934	1.20553
3.315	1.81675	2.24319	1.20997
3.37165	1.83728	2.27307	1.23229
3.33164	1.86619	2.26503	1.23207
3.31185	1.84233	2.26954	1.22774
3.35181	1.82217	2.23193	1.22915
3.33606	1.83869	2.22708	1.23991
3.33734	1.83923	2.21367	1.26549
3.36045	1.86312	2.24674	1.23918
3.33398	1.8422	2.23759	1.24473
3.35086	1.83214	2.23464	1.23658
3.3705	1.84452	2.27712	1.2193
3.3252	1.85501	2.27492	1.23482
3.33745	1.83045	2.26206	1.22057
3.35533	1.83915	2.26403	1.22471
3.34924	1.84364	2.26443	1.21211
3.32994	1.86501	2.25941	1.22311
3.33269	1.8568	2.27495	1.23521
3.33443	1.8468	2.29811	1.23204
3.30198	1.84465	2.29511	1.23807
3.31442	1.8637	2.29245	1.24239
3.35992	1.8819	2.30308	1.24662
3.32619	1.89304	2.25171	1.24338
3.32505	1.8677	2.26514	1.23026
3.35387	1.86648	2.27321	1.22051
3.34256	1.87587	2.2615	1.2177
3.34739	1.84544	2.25807	1.22154
3.32095	1.82862	2.25375	1.22176
3.3397	1.87121	2.28697	1.19689
3.32327	1.86409	2.28453	1.21377
3.32131	1.85662	2.26784	1.23032
3.34969	1.87294	2.27344	1.21697
3.3411	1.85829	2.27062	1.21403
3.34511	1.86038	2.2631	1.2158
3.32363	1.86097	2.26585	1.24296
3.35739	1.86913	2.2543	1.2471
3.38023	1.85962	2.25743	1.23842
3.35308	1.84222	2.23783	1.25398
3.35738	1.8665	2.24407	1.2422
3.3496	1.84325	2.24599	1.24702
3.32085	1.85222	2.24609	1.24909
3.33434	1.83966	2.25718	1.23574
3.36242	1.87029	2.25909	1.218
3.34505	1.86978	2.26732	1.20835
3.35438	1.87298	2.29254	1.21957
3.354	1.87402	2.29728	1.22154
3.37457	1.85478	2.30215	1.22052
3.36979	1.82331	2.28006	1.21015
3.38091	1.84958	2.29128	1.21239
3.38479	1.88266	2.29758	1.22627
3.37006	1.86135	2.28237	1.23384
3.39413	1.86421	2.31775	1.22252
3.37759	1.8501	2.32884	1.22269
3.37557	1.85551	2.29368	1.24908
3.39061	1.86231	2.3155	1.23614
3.36615	1.86103	2.29062	1.24066
3.37353	1.87313	2.29035	1.24002
3.39834	1.84704	2.27789	1.2393
3.38256	1.84022	2.2883	1.21653
3.38816	1.87284	2.30113	1.21317
3.39332	1.86592	2.28195	1.24174
3.37153	1.84828	2.2907	1.24623
3.37402	1.8604	2.28097	1.22296
3.38456	1.8671	2.25059	1.23231
3.37371	1.84893	2.26487	1.24529
3.36338	1.84458	2.24679	1.24715
3.35621	1.86582	2.25741	1.23478
3.37245	1.84899	2.26738	1.21543
3.377	1.86168	2.29603	1.23579
3.36397	1.85483	2.31271	1.21833
3.37779	1.88934	2.29605	1.21908
3.37751	1.8883	2.28694	1.2204
3.33818	1.88551	2.29543	1.23748
3.3725	1.85677	2.29822	1.25577
3.35346	1.85267	2.30358	1.24084
3.36034	1.86647	2.30024	1.23607
3.38562	1.86404	2.3063	1.22917
3.39149	1.86617	2.29529	1.22542
3.39042	1.86497	2.29816	1.24602
3.40616	1.87154	2.3173	1.23739
3.40547	1.86752	2.31847	1.23145
3.40299	1.87672	2.29154	1.24007
3.42386	1.85791	2.30872	1.23428
3.39401	1.86192	2.26991	1.25563
3.38529	1.83401	2.29105	1.23685
3.36889	1.85858	2.31462	1.2593
3.37391	1.85931	2.29328	1.23957
3.39767	1.89935	2.2961	1.21879
3.34354	1.86688	2.32356	1.23962
3.38143	1.8574	2.30392	1.22308
3.38509	1.87592	2.32436	1.23705
3.37583	1.86804	2.32239	1.22232
3.41309	1.85222	2.32175	1.22566
3.41555	1.84992	2.31096	1.22382
3.41938	1.84601	2.31697	1.21655
3.37847	1.84485	2.29036	1.22496
3.36998	1.87678	2.2657	1.24771
3.36593	1.85195	2.26452	1.2399
3.36675	1.85826	2.26438	1.24609
3.361	1.87211	2.28712	1.24308
3.3996	1.86408	2.27263	1.25262
3.33312	1.87263	2.27142	1.26278
3.34895	1.8773	2.29601	1.24072
3.33348	1.86611	2.32006	1.24989
3.35791	1.88584	2.30985	1.26444
3.3468	1.87746	2.25267	1.23803
3.32793	1.87694	2.26016	1.25215
3.34542	1.88158	2.26636	1.24499
3.35294	1.88535	2.25265	1.26118
3.35236	1.88317	2.26467	1.24643
3.37983	1.90366	2.23734	1.25652
3.34234	1.88374	2.29684	1.25291
3.3568	1.86909	2.30466	1.23656
3.29313	1.84066	2.30171	1.21212
3.33456	1.85874	2.2897	1.2338
3.3527	1.88973	2.27085	1.23335
3.33423	1.87179	2.28503	1.23015
3.333	1.89681	2.30411	1.24039
3.32064	1.90625	2.30251	1.24086
3.34777	1.90426	2.30468	1.25998
3.37315	1.94067	2.28299	1.23652
3.34221	1.92599	2.2959	1.21085
3.35021	1.93409	2.30509	1.21887
3.36096	1.92129	2.30354	1.23362
3.37469	1.88932	2.32216	1.2582
3.37442	1.89702	2.30585	1.24759
3.37979	1.88698	2.29248	1.2524
3.35103	1.88047	2.31756	1.28562
3.34208	1.90372	2.31728	1.2638
3.36586	1.86837	2.27323	1.22521
3.342	1.87545	2.3005	1.25349
3.34512	1.89514	2.31942	1.26308
3.32921	1.90186	2.30623	1.26264
3.35483	1.87991	2.29006	1.22556
3.38515	1.9118	2.29684	1.23152
3.42278	1.89936	2.29305	1.23713
3.40415	1.83544	2.32733	1.20521
3.37165	1.8636	2.31988	1.21736
3.37277	1.88163	2.31574	1.19621
3.34981	1.87146	2.3268	1.20045
3.35732	1.89671	2.33439	1.22383
3.37824	1.85824	2.32572	1.24603
3.35908	1.85961	2.31396	1.22452
3.38031	1.84884	2.305	1.22088
3.39054	1.8656	2.29422	1.2399
3.38335	1.83977	2.32699	1.25173
3.35082	1.84427	2.33977	1.26325
3.33352	1.87032	2.32311	1.24079
3.34472	1.92758	2.31933	1.25405
3.32905	1.92075	2.32258	1.25774
3.30976	1.92417	2.35702	1.25499
3.35175	1.8648	2.30145	1.26631
3.35419	1.89658	2.30855	1.2522
3.34653	1.88659	2.32668	1.24954
3.36078	1.90133	2.30815	1.22178
3.31929	1.88661	2.308	1.2389
3.37038	1.86069	2.2968	1.25929
3.34783	1.89241	2.29964	1.25692
3.33263	1.84865	2.29633	1.22317
3.36357	1.86226	2.30059	1.24153
3.37362	1.86401	2.28072	1.22524
3.43839	1.83683	2.29195	1.24103
3.41175	1.85049	2.31133	1.21442
3.38667	1.85675	2.31676	1.22461
3.38134	1.88372	2.28788	1.22569
3.33761	1.88425	2.27865	1.19482
3.39767	1.88763	2.2794	1.21693
3.3604	1.87315	2.28373	1.21786
3.35002	1.86975	2.3091	1.23869
3.32865	1.84623	2.30363	1.2628
3.32497	1.85917	2.3084	1.22089
3.32722	1.84744	2.31128	1.23623
3.34819	1.84234	2.3128	1.215
3.34359	1.86133	2.27525	1.21828
3.35563	1.85374	2.2556	1.23124
3.34406	1.84776	2.26238	1.23758
3.35687	1.84668	2.25606	1.24828
3.37855	1.85319	2.24872	1.26098
3.37992	1.85718	2.23834	1.25496
3.39896	1.88273	2.27769	1.26443
3.40133	1.88012	2.28512	1.24763
3.37746	1.87362	2.27604	1.23535
3.38083	1.85905	2.28347	1.23074
3.33133	1.87826	2.31592	1.24227
3.37535	1.85173	2.306	1.22465
3.40379	1.86951	2.31766	1.22434
3.3772	1.8711	2.32014	1.23177
3.38846	1.86411	2.29142	1.24348
3.37988	1.8691	2.28437	1.23165
3.36104	1.8841	2.30961	1.23775
3.36041	1.88996	2.32383	1.21839
3.33272	1.87082	2.28429	1.22055
3.34043	1.90153	2.27186	1.25513
3.37538	1.89368	2.32905	1.23261
3.35658	1.8614	2.33561	1.2445
3.34938	1.84399	2.31448	1.21988
3.3725	1.88203	2.31511	1.21524
3.36871	1.88113	2.2986	1.23405
3.37776	1.87816	2.26602	1.2244
3.33095	1.88374	2.27725	1.22657
3.37045	1.86851	2.28657	1.21934
3.39531	1.87955	2.30756	1.21018
3.37111	1.88253	2.32807	1.22393
3.36182	1.8748	2.30376	1.23585
3.37267	1.83664	2.32829	1.25386
3.35201	1.86765	2.29457	1.24342
3.34827	1.91232	2.29679	1.25513
3.3223	1.85323	2.29836	1.23351
3.35998	1.86935	2.27033	1.22415
3.35283	1.87426	2.27244	1.23787
3.36503	1.87912	2.29081	1.22248
3.37356	1.86329	2.26255	1.23282
3.39338	1.86345	2.27044	1.23013
3.38941	1.88802	2.27669	1.26012
3.37848	1.86694	2.27556	1.27772
3.37889	1.85448	2.29266	1.2545
3.39257	1.86565	2.32631	1.23415
3.40559	1.86864	2.30371	1.22807
3.43111	1.89503	2.25794	1.20825
3.404	1.83857	2.25553	1.24266
3.3992	1.86939	2.27713	1.24301
3.42065	1.84539	2.29469	1.23117
3.36687	1.87137	2.34545	1.24887
3.4132	1.83006	2.29866	1.23655
3.40467	1.84196	2.28766	1.22268
3.39464	1.8608	2.29708	1.20688
3.43786	1.84614	2.30519	1.23073
3.38734	1.86141	2.31625	1.22098
3.40933	1.85727	2.29511	1.22486
3.40998	1.88523	2.29943	1.23065
3.40462	1.86902	2.25477	1.23337
3.40491	1.86882	2.28102	1.21443
3.4114	1.86312	2.24623	1.19989
3.38238	1.86204	2.31204	1.20456
3.38934	1.86862	2.34794	1.18991
3.40695	1.88949	2.33888	1.20216
3.36415	1.88635	2.36234	1.20953
3.35136	1.92653	2.36122	1.23955
3.39115	1.87579	2.32171	1.24487
3.3967	1.90721	2.3301	1.23229
3.40699	1.91055	2.35194	1.24164
3.40754	1.88254	2.32029	1.23316
3.4084	1.88795	2.30727	1.20865
[truncated: 2,278 more rows]
