# Supplementary material for: Myosin with hypertrophic cardiac mutation R712L has a decreased working stroke which is rescued by omecamtiv mecarbil
Source: eLife journal article supplement (doi:10.7554/elife.63691), 2021-02-19
Supplement: fig5-data1 [file Fig5C Source Data.xlsx]

## Sheet: Forward Ensembles
**Timescale = 0.4 ms
Buffer A (+OM)	Buffer B (no OM)	~50% Buffer A
1.4818	-0.160551	1.63267
1.57085	0.618592	0.331712
0.978736	-0.0403107	0.790427
0.864479	0.522966	0.523565
1.33078	0.56009	0.669133
0.72539	-0.453335	0.418879
1.20713	-0.202642	0.610463
0.44874	-0.437744	0.462815
0.666324	0.678991	-0.433828
1.13618	0.711306	0.6279
0.841395	0.525363	0.162747
1.0281	0.116055	0.655467
1.10935	-0.630797	1.01381
0.87073	0.141525	0.687417
0.920991	0.137195	0.541346
0.801777	1.14698	1.05068
0.847694	1.04313	0.688196
0.908906	-0.0375724	1.10305
0.74311	0.800269	1.27071
0.769566	0.543841	1.1447
0.849391	-0.252254	0.648346
0.650466	0.328591	1.05722
1.15079	-0.300117	0.771679
0.897336	-0.0316686	0.682355
1.06514	-0.256154	0.706788
1.13229	0.502517	0.915315
0.571831	0.695181	0.53837
0.753582	0.616587	1.67362
0.928746	0.256445	1.35459
0.454525	0.222165	0.575236
0.632841	-0.363194	0.16738
0.356156	0.016503	0.510403
0.712765	-0.299301	0.504523
1.05427	0.519666	0.512984
1.27145	0.109347	0.67306
0.732267	-0.357755	1.18258
0.52916	-0.439334	0.749079
0.588304	-0.671398	0.735113
0.868086	-0.212247	0.551178
0.724008	0.146219	0.197286
0.902796	0.283256	1.0638
0.757592	-0.237367	0.918648
0.815653	0.652905	0.472635
0.748139	-0.18915	0.561619
0.142723	0.426969	0.365717
0.702536	0.583249	0.585559
0.61541	0.202581	0.594643
0.596635	1.73358	0.95211
0.537258	1.03962	0.0881896
0.414651	0.357836	0.983261
1.16046	1.10434	0.701908
0.682747	0.848498	1.23065
0.785239	0.914542	1.27446
0.931028	0.291315	0.86507
0.874743	-0.310799	0.993667
0.786641	0.077242	0.465667
0.285223	-0.0257682	0.596858
0.139028	0.513668	1.03057
0.546957	0.361339	1.44431
0.800373	0.410575	0.598964
0.598675	0.131317	0.34899
0.575073	0.277054	1.15037
0.355484	0.120663	1.37022
0.909972	0.247505	1.21921
0.401131	0.490243	1.31995
0.630813	0.254699	0.692365
0.0150726	0.81043	1.28838
-0.0147162	1.19065	0.92424
0.42538	1.07042	1.14004
0.446447	0.00965722	0.838798
0.331455	0.49321	0.372071
0.434057	0.974399	1.3472
0.331332	-0.14386	1.05358
0.465547	0.360109	0.726562
0.224968	0.0441856	0.734378
-0.120952	-0.164389	0.0343766
0.21909	0.0484891	0.539355
0.330724	-0.223521	0.485818
0.329903	-0.496712	0.0961785
0.280981	0.175032	-0.544873
0.0977175	-0.678998	-0.147918
0.90347	-0.610192	0.2553
0.360503	-0.472395	-0.269865
0.00165985	0.0340915	-0.178823
0.278302	0.830778	0.5974
0.252584	-0.587399	0.512977
0.0892098	-0.049323	0.433843
0.155111	0.234779	0.373268
0.407022	0.551169	-0.0538592
-0.107285	0.48533	0.142606
-0.160586	0.674013	-0.417579
0.0507758	0.290158	-0.085348
0.0958723	0.707021	-0.654429
0.0799823	-0.0452937	-0.457754
0.370784	0.139374	-0.286098
0.383644	0.0423157	-0.374577
0.13078	-0.120972	0.0840374
0.0162398	1.00746	0.597621
0.14935	-0.436739	0.546031
0.151291	-0.216803	0.523362
0.140279	0.400172	0.180906
0.233313	0.100123	1.15008
0.0217371	0.0967913	0.293799
-0.431072	0.435716	0.496451
-0.297067	1.04109	0.207126
-0.0656964	0.0517937	0.0120894
-0.305175	-0.269203	-0.00229208
-0.399221	0.115722	0.21978
0.00401679	1.34277	0.66965
-0.0597052	0.104111	0.289656
0.144825	0.290596	0.502365
-0.0391626	0.493261	0.621534
0.0705648	1.04126	0.644993
0.203398	0.430116	0.411341
-0.111158	1.17091	0.973571
0.249895	0.934453	-0.0371506
0.194858	0.674758	0.312501
0.128489	0.0756688	0.484281
0.121661	1.2943	1.41033
0.0687739	0.607766	1.0427
0.28012	0.819257	0.234123
0.518215	0.459705	0.855927
0.0321823	0.426272	0.808608
-0.100438	0.766692	0.124013
-0.222379	0.634323	-0.29097
0.248494	0.167449	0.28316
0.184121	0.286084	-0.24514
0.231147	1.4561	0.704388
0.53996	1.33371	0.324842
0.101671	0.771972	0.809891
0.258422	0.616589	0.333707
-0.0204426	0.282845	0.0597104
-0.0591826	-0.825689	0.0023859
0.419894	-0.11469	-0.200151
0.0438154	1.11097	0.264112
-0.360754	0.598188	0.353687
0.081291	0.738368	-0.125032
-0.305957	0.143684	0.130592
-0.0148741	0.92743	0.454558
-0.193242	1.00726	0.522307
-0.440787	0.664793	0.215479
0.0345022	1.50108	0.638474
0.0708318	-0.109734	0.261576
0.0577336	0.117711	0.221023
0.0473118	1.05069	1.0064
-0.154763	0.714767	0.465542
0.33077	1.1305	0.293478
0.405815	-0.278648	0.652365
0.635595	1.00491	0.500414
0.741714	1.21858	0.504056
0.573121	1.09903	1.07471
1.00021	1.37241	1.09987
1.08806	1.82987	1.61151
1.46841	1.02997	1.90291
1.34472	0.647379	2.04522
1.26041	0.770689	1.68798
1.31617	1.22295	1.92903
1.37171	1.93229	2.07296
1.5532	1.7968	2.28562
1.41505	1.77581	1.76034
1.44516	1.22455	1.85871
1.62711	1.25864	1.94511
1.84447	1.79982	1.61489
1.64515	1.44721	2.31998
1.85711	1.47465	2.00565
2.01096	1.92045	2.61341
2.05423	2.70339	2.49054
2.40499	1.76124	2.58486
2.63744	0.898603	2.55178
2.37882	1.95029	2.10508
2.30617	2.28567	2.42087
2.22573	2.34261	2.16699
2.09627	2.10048	1.78558
2.16609	1.62001	2.4795
2.37195	1.89407	2.69536
2.46365	1.84167	2.31545
2.58778	2.56086	2.13251
2.63015	1.93124	2.25386
2.84484	1.94805	2.05291
2.97147	2.38311	2.57792
3.05286	1.37791	2.83579
2.78223	1.7414	2.84792
3.03048	1.77976	2.61675
2.87285	1.82197	2.45793
3.03001	2.59999	3.04815
2.81121	2.36716	3.00807
2.66782	2.91722	3.04279
2.83653	3.01015	2.63612
2.81638	2.49945	2.52655
2.78826	1.73092	2.50829
2.9958	1.75412	2.6795
3.20831	1.82842	2.62102
3.00542	2.04902	2.55922
3.04623	2.15549	2.32067
3.13366	1.71857	2.97093
2.95365	1.95694	2.68716
3.12927	2.31518	3.18611
3.26479	1.91948	3.05382
3.17697	2.03868	3.1871
3.25351	2.11666	3.08039
3.35555	1.56899	3.32347
3.38067	2.18205	3.02256
3.47082	2.0322	2.86957
3.42472	1.75123	2.45896
3.39239	2.01774	2.94986
3.54965	2.41303	2.90677
3.76405	2.15992	2.83129
3.55714	2.79892	2.94585
3.47898	2.92921	2.67596
3.3698	2.38821	2.69097
3.39298	2.8832	3.10966
3.56726	2.39678	2.68958
3.43908	2.3415	2.58198
3.40268	2.39827	2.89659
3.5207	2.67436	3.12656
3.52519	2.00007	2.79182
3.45865	2.66391	2.65823
3.56662	2.18148	2.37315
3.40814	2.47733	2.4885
3.35804	2.42909	2.68602
3.36856	2.73981	2.61055
3.40139	2.57346	2.65015
3.59343	2.67157	2.65375
3.53702	2.38547	2.65612
3.41133	2.4721	2.98577
3.40018	2.47434	2.95698
3.57634	2.52687	2.82839
3.60653	2.37845	2.55017
3.71309	2.24298	2.53592
3.8861	2.1404	2.37724
3.69687	2.2885	2.71036
3.51539	2.35498	2.67919
3.6082	2.70409	2.88496
3.97585	2.5125	2.20881
4.01524	2.66319	2.33413
3.95994	2.76946	2.49551
4.11775	2.8728	2.91827
3.8938	2.51085	3.16631
3.82116	2.79021	2.75688
3.77804	2.30797	2.77563
4.05017	2.58926	2.83355
3.86938	2.50781	2.91606
3.85208	2.55786	2.35576
3.87466	1.93702	2.83804
3.97947	2.17229	2.87665
3.88398	2.07943	2.69864
3.93469	2.10783	2.69265
3.99807	2.72448	2.3691
3.96313	2.75901	2.70892
3.93256	2.66895	2.29415
3.96744	2.79789	2.85779
4.07767	2.80869	3.18635
4.1278	2.69178	3.00013
4.16279	2.97273	3.0801
4.1161	2.86744	3.35381
4.04754	3.26014	3.2519
4.23161	2.95784	3.21766
4.0794	3.06637	3.21712
4.0978	3.17365	3.00712
4.14413	3.19678	3.15567
4.26621	3.05945	3.29308
4.41565	2.61633	2.90015
4.3258	2.42918	2.99868
4.30859	2.808	2.82673
4.34825	3.1545	2.45345
4.36786	3.02135	2.51154
4.35689	2.91022	3.05197
4.32302	3.01075	3.15632
4.24653	3.2132	3.09524
4.28979	2.85153	2.86548
4.54566	2.95317	2.47426
4.54645	3.09649	2.39295
4.49654	3.06579	2.79666
4.40542	2.95648	2.89962
4.56988	2.83905	2.96365
4.56369	3.13409	3.01419
4.48124	3.08652	3.09694
4.36981	2.55558	3.29062
4.51267	2.43487	2.83917
4.5238	2.45196	3.31671
4.43619	2.66102	3.27543
4.48906	2.91596	3.08691
4.56957	2.79453	3.34299
4.38616	3.40589	3.32076
4.44815	3.3767	3.01519
4.29193	3.4911	2.85522
4.40713	3.21086	3.0189
4.5851	2.86624	2.76255
4.41432	3.47251	3.2635
4.65538	3.43528	3.02619
4.72414	3.28564	3.05074
4.66371	3.43084	2.91709
4.57084	3.39001	2.72709
4.51316	3.07944	3.07339
4.66135	2.77543	3.21882
4.63985	2.91958	3.36591
4.50504	3.09725	3.28589
4.5114	2.64865	3.07634
4.53068	3.43702	3.24025
4.4146	3.02255	3.00142
4.61056	3.48407	2.94372
4.64671	3.57562	2.92434
4.68104	3.16509	2.73751
4.948	3.12599	3.24471
4.94762	2.61379	3.39295
4.98236	3.28408	3.32169
4.87763	3.21653	3.41989
4.76292	3.53891	3.27608
4.84333	3.59722	3.51561
4.71361	3.27425	3.60684
4.57331	3.14436	3.35465
4.59399	3.32904	3.40056
4.73616	2.89581	3.13737
4.7724	2.88838	3.23395
4.61635	2.77239	3.35156
4.45483	3.15962	3.43977
4.38367	3.35038	3.57881
4.76966	3.02805	3.31785
4.96383	3.19766	3.42745
4.86596	3.41772	3.37306
4.95287	3.38643	3.9099
4.70305	3.56631	3.68076
4.72858	3.4667	3.74114
4.82973	3.13722	3.64033
4.54843	3.3265	3.1709
4.60975	3.09842	3.3214
4.52654	2.82238	3.52576
4.63432	3.10613	3.57859
4.84695	2.78418	3.29901
4.80712	2.8786	3.69012
4.718	3.29521	3.55848
4.62266	3.17462	3.50747
4.85108	3.19817	3.70726
4.81305	2.90349	3.70117
4.75798	3.31304	3.55713
5.00208	3.21052	3.77796
4.68956	3.42262	3.67345
4.64315	3.31286	3.37458
4.70808	3.25311	3.43357
4.74246	3.0096	3.30407
4.87911	2.68832	3.73285
4.87033	2.78251	3.75194
4.89719	2.65448	3.79276
4.87464	2.68586	3.4779
4.80449	3.05089	3.96095
4.83763	2.60307	3.81318
5.06007	2.85861	3.41162
4.81911	3.19543	3.67266
4.77127	3.47674	3.56342
4.75757	2.94268	3.36366
4.69306	3.01304	3.29766
4.76435	3.52493	3.17863
4.90651	3.19546	3.56362
4.64081	2.94746	3.74721
4.87945	3.04559	3.74547
4.77097	2.92965	3.59115
4.9717	2.54049	3.58581
4.99382	2.80204	3.39713
5.0818	3.16094	3.55951
4.98168	3.1129	3.4274
4.97588	3.22498	3.9094
5.00614	3.15176	3.67278
4.72452	3.54218	3.68179
4.88511	3.25412	3.55962
4.93717	3.09809	3.50972
4.74317	3.25104	3.76428
4.89072	3.11107	3.56338
4.8141	3.25215	3.61942
4.79044	2.92745	3.66409
4.92555	2.93315	3.88617
4.86139	2.6756	3.83233
4.94622	3.10921	3.87908
5.04987	2.71283	3.72049
5.01865	3.12174	3.48247
5.12252	2.99208	3.62622
5.16214	3.2751	3.49722
5.05598	3.27486	4.01872
5.04829	3.40483	3.94216
5.0719	3.67585	3.6504
4.97602	3.05469	3.83719
5.04068	2.8479	3.7013
4.92463	2.62815	3.68695
5.16541	3.09082	3.63214
5.11355	2.63307	3.55152
5.02815	2.86874	3.64304
5.14837	3.20048	3.87636
5.28227	3.06839	3.81664
5.1285	3.27094	3.5943
5.10443	2.60935	3.68584
5.06107	2.9505	3.66041
5.07955	3.22006	3.67372
5.23502	3.04388	3.6822
5.31181	3.10647	3.69663
5.19376	3.60578	3.8045
5.21731	3.45975	3.9596
5.15528	3.34168	3.8535
5.05783	3.62657	3.99764
5.10362	3.42605	3.98179
5.12611	3.47644	3.76123
5.0723	3.14013	3.80425
5.3898	3.28013	3.75809
5.3725	2.9411	3.42623
5.32426	2.78752	3.3743
5.38944	2.85109	3.74978
5.51612	2.84449	3.8555
5.35645	2.79379	3.81256
5.14154	2.79045	3.77678
5.02539	2.74383	3.65003
5.07982	2.741	3.74462
4.93342	2.82583	3.62578
5.01065	2.81371	3.62313
5.23523	2.86391	3.54168
5.12508	2.86107	3.79735
5.01999	2.96307	3.73435
5.14055	2.64885	3.57357
5.20405	2.9043	3.66715
5.20817	2.92539	3.76975
5.14552	3.18436	3.59124
5.14388	3.20072	3.74876
5.12262	2.96242	3.85859
5.27609	3.55325	3.85897
5.18282	3.06929	3.7489
5.08942	2.88411	3.83869
5.11882	2.94055	3.68125
5.20288	3.04793	3.67197
5.34718	2.57892	3.7675
5.10493	2.65288	3.52015
5.11169	3.22971	3.4435
5.26582	3.24403	3.493
5.25303	3.03495	3.64512
5.17296	2.41467	3.37457
5.20316	2.42558	3.49002
5.0928	2.79767	3.85402
5.11399	2.90098	3.91393
5.04533	2.77479	3.48514
5.02188	3.04362	3.71611
5.1417	2.66831	4.04138
5.08119	2.33747	4.04364
5.01728	2.40578	4.03823
5.09921	2.09473	3.84742
5.07499	2.10841	3.7717
4.96503	2.64691	4.01889
5.01669	2.53976	3.70701
5.21394	2.41353	4.05988
5.29593	2.67742	3.80142
5.34943	2.76678	3.57228
5.23307	2.82699	3.37057
5.23044	2.82932	3.64148
5.05823	2.73951	3.9157
4.94025	3.33693	3.77425
4.94762	3.29283	3.5818
4.98109	2.70682	3.49029
5.01475	2.46752	3.50438
5.18209	2.57969	3.56916
5.2366	2.68588	3.67061
5.09863	2.93525	3.83778
5.18819	2.84595	3.90292
5.15927	2.40172	3.58642
5.11215	2.68844	3.69271
4.93885	3.08181	3.66481
5.06576	2.96094	3.49526
5.0991	2.90438	3.52306
4.93151	2.90798	3.40378
5.03878	2.98773	3.6521
5.05176	2.66765	3.55938
5.06652	2.89196	3.68797
5.10107	2.57282	3.85302
5.03111	2.63147	3.8364
4.99438	2.63883	3.9156
5.01819	2.73549	4.06825
5.04822	2.55317	3.97938
5.12818	2.86829	3.79867
5.03062	2.93345	3.87446
5.00986	2.68572	3.69689
4.99665	2.60629	3.47011
5.02228	2.75703	3.82696
5.08367	2.59979	3.72091
5.19542	2.71507	4.07344
4.96177	2.95759	4.19535
5.05435	2.36272	3.6422
5.11226	2.39614	3.73699
5.27596	2.55064	3.58586
5.05752	2.7222	3.67205
4.76784	2.71708	3.85973
4.86781	2.61462	3.61188
5.04925	2.77247	3.55468
5.14041	2.58976	3.53278
4.87499	2.69564	3.83815
5.02213	2.60003	3.79304
4.97659	2.63762	3.75527
5.01359	2.87527	3.62629
4.91201	2.73568	3.57407
4.93011	2.65272	3.68261
4.93638	2.25159	3.97517
4.93719	2.3283	3.7547
5.15277	2.43439	3.72768
5.17005	2.41998	3.68151
4.97838	3.08988	3.73688
4.92271	2.80636	3.793
4.96701	2.51471	3.9726
4.99343	2.81843	3.71856
4.85247	2.88737	3.92529
4.94247	2.73643	3.78002
4.90645	2.73777	3.84274
4.82909	2.5986	4.09584
4.92508	2.89966	3.62846
4.89061	2.72864	3.83631
4.87804	2.81445	3.89116
4.9208	2.74843	3.74981
5.08784	2.82891	3.54404
4.92883	2.71778	3.67921
4.99642	2.6806	3.71964
4.84171	2.3546	3.84995
4.87884	2.41275	4.03026
4.99263	2.57663	4.09069
5.06019	3.04813	3.94006
5.00838	3.00169	3.83527
5.00844	2.77378	3.63864
4.8998	2.89748	3.85516
5.11082	2.75173	4.04829
5.10761	2.65659	3.74832
4.99644	2.87172	3.60286
4.93047	2.93707	3.58461
4.90961	2.8469	3.76069
4.81065	2.85738	3.74514
4.92231	2.88384	3.57091
4.87912	2.78086	3.57784
4.87083	2.57926	3.73143
4.90716	2.80648	3.84724
4.96911	2.82949	4.12187
5.09489	2.49144	4.06629
5.02656	2.68684	4.03252
5.16889	2.71916	4.04375
5.07591	2.68259	3.92613
4.92547	2.66427	3.81233
4.91079	2.7186	3.94713
4.71244	2.68022	3.76791
4.9322	2.55871	3.98403
4.89135	2.59848	3.75017
4.87353	2.75947	3.67754
4.82041	2.42858	3.76907
4.85535	2.35951	3.79054
4.92036	2.79205	3.88099
5.07064	2.74053	3.88602
5.09534	2.88802	3.81391
5.1603	3.07536	4.19541
5.05653	3.08307	4.06418
5.029	3.03563	3.89316
5.1365	3.12239	4.00838
4.95898	2.90926	3.78161
4.96651	2.60148	3.93309
4.84703	2.75073	3.82172
4.84807	3.08239	3.62136
4.8848	2.6937	3.68559
5.06642	2.90868	3.8173
5.09439	3.02739	3.81401
5.12802	3.02037	3.89843
5.21661	2.99167	3.92398
5.07396	3.02007	3.75373
5.02007	3.40481	3.76448
5.1612	3.06389	3.86431
5.05067	2.99645	4.03091
5.02382	3.03239	3.8479
5.06858	2.99236	4.07298
5.1493	2.68613	4.10984
5.0873	2.71631	3.89375
5.20037	2.71476	4.15249
5.20957	2.41545	4.11673
5.24774	2.54344	4.05975
5.10049	2.44805	3.96458
5.02389	2.26112	3.70401
4.9584	2.3389	3.57332
5.13638	2.48215	3.70101
5.01406	2.60291	3.62171
4.99886	2.77335	3.67832
5.09515	3.07012	3.6413
5.16249	2.94235	3.65565
5.16499	3.47333	3.52045
5.15328	2.94776	3.73324
5.01263	2.93355	3.56334
5.01544	2.93676	3.4583
5.13046	3.03653	3.37859
5.19258	3.21925	3.53106
5.1242	3.26204	3.74167
5.2059	3.25214	3.70254
5.09961	2.81615	3.61604
5.08619	2.85972	3.61058
5.14189	3.06064	3.7399
5.19684	2.86961	3.5062
5.24214	2.94558	3.76239
5.10507	2.90737	3.75344
5.11028	2.7257	3.69731
5.10024	2.48421	3.76548
5.08193	2.66785	3.85878
4.98936	2.81991	3.58202
5.03811	2.85885	3.56781
4.93152	3.18619	3.77013
5.04709	3.04326	3.85334
5.04266	3.32139	3.61548
5.02077	3.16536	3.66226
5.15409	3.37853	3.96661
5.07523	3.28858	3.79511
5.12521	2.90965	3.64913
5.07757	2.88394	3.74529
5.1345	2.74193	3.83404
5.08681	2.95545	3.70364
5.10169	2.95514	3.78264
5.07604	2.95577	3.84761
5.04824	2.72909	3.76647
5.01548	2.81872	3.52611
5.06722	2.59976	3.71168
5.24845	2.73798	3.81261
5.07164	2.83094	3.96787
5.1594	2.70636	3.99889
5.21963	3.19843	4.0497
5.19369	3.07313	3.88627
5.13966	2.96146	3.80225
4.97741	3.00374	3.91594
4.94771	3.05754	3.99853
4.99346	3.22476	4.06814
4.88788	3.0259	3.76438
5.03414	3.01448	3.91904
5.09412	3.1209	3.67377
5.03002	2.89467	3.72709
5.12025	3.05412	3.73181
5.2225	2.83255	3.817
5.25471	2.82398	3.5677
5.1005	3.02244	3.792
4.96403	3.2497	3.81851
4.96346	3.0929	3.92999
4.8358	2.99313	3.99741
4.84376	2.90543	3.88415
4.99728	3.10736	3.91034
4.84945	3.21409	3.95912
4.9575	3.09078	4.09662
5.08383	2.9629	4.07756
4.96764	2.91332	4.30836
5.12546	2.95931	3.89375
5.05162	2.90625	4.10486
5.11167	3.3354	3.96348
5.16616	2.97585	3.7807
5.23622	2.87474	3.39737
5.26606	3.11102	3.55508
5.0822	2.96007	3.69813
5.09915	2.71008	3.8946
5.13243	2.86535	3.82656
5.15516	2.95058	3.86813
5.14786	2.86482	3.93264
4.97515	2.56692	4.03138
5.0156	2.48063	3.90433
4.92635	2.58425	3.79732
4.90257	2.7966	3.85918
5.04646	2.99999	3.94425
5.07751	3.06	3.77361
5.11969	2.84799	3.97107
5.01079	2.74561	4.24344
5.09213	2.76227	3.91943
4.97206	2.79223	3.97327
5.0207	2.74545	3.98608
5.10583	2.73884	3.71019
5.01577	2.88	3.72502
4.88917	2.98362	3.73
5.04231	2.86951	3.75393
5.00464	2.95793	4.0551
5.06308	2.68074	4.05518
5.02175	2.89581	4.17069
4.9836	2.9703	3.88299
4.92592	2.81025	3.96997
4.99137	2.93517	4.03635
5.07216	3.07286	3.7165
5.22962	3.02732	3.92259
5.27884	3.11767	3.9438
5.13498	3.21611	4.00389
5.32273	3.23723	3.99812
5.2435	3.0564	4.08197
5.23641	3.06342	4.16761
5.10187	3.42242	4.07989
4.94152	3.21387	3.89556
4.93707	3.16571	3.81668
4.98118	3.09595	4.05769
5.02896	3.01713	4.08748
5.11067	3.11561	3.99492
5.11059	3.08301	3.91352
5.08902	2.98945	3.87905
5.20749	2.98819	4.02389
5.21223	3.04957	4.06385
5.22266	2.93848	4.00494
5.02835	3.29627	4.03219
5.13612	3.09741	4.20148
5.15488	3.08158	4.13908
5.18521	2.77548	4.1008
5.11686	2.67026	3.79004
5.2397	2.87333	3.73488
5.26932	2.69688	3.91334
5.19907	2.68347	3.94174
5.23267	3.09637	4.02125
5.12331	3.17001	4.1043
5.1523	2.9741	3.98698
5.06642	2.92571	3.90465
4.88515	2.87765	4.06563
5.02669	2.94613	4.15647
4.93031	2.84855	4.23391
5.1134	2.95482	4.15127
5.08422	2.95664	4.29279
5.10727	2.65879	4.06977
4.95095	2.53225	4.09337
4.97219	2.56758	3.87491
5.07097	2.62867	4.14021
5.13979	2.79761	3.92751
5.05872	2.84773	4.00064
4.97921	3.01354	3.92011
5.03719	3.27976	4.10381
4.99712	3.35739	3.69949
5.0699	3.18507	3.84985
5.02493	3.07047	3.94944
5.06054	2.95835	3.85531
5.05181	2.73381	3.6461
5.11057	2.96315	3.85846
5.05481	2.87685	3.76594
5.14283	2.85871	3.77402
5.10008	2.95728	3.86353
5.15333	3.12006	3.72233
5.08131	3.06397	3.80278
5.0281	3.14962	3.78278
5.02413	2.96706	3.75484
5.05407	2.8467	3.92455
4.97067	2.7557	3.97773
5.08848	3.18854	3.88605
5.12478	3.17233	3.98242
5.18569	3.17241	3.93633
5.04401	3.0059	3.70956
5.04621	2.97461	4.02505
5.02568	2.75894	3.91135
5.06648	2.65589	3.97409
5.06042	2.78732	4.14964
5.14795	2.69931	3.93503
5.10452	2.64415	3.84998
4.97085	2.96946	3.88142
5.07948	2.98795	4.07115
5.08958	2.77872	4.01242
5.19958	2.74812	4.10446
5.2261	2.88059	4.22991
5.24831	3.05503	4.27059
5.25411	2.98984	4.03445
5.30037	2.93512	3.99376
5.2161	2.82041	3.77968
5.06911	3.09311	3.95166
5.07182	3.0064	3.95872
5.06941	2.98093	4.28544
5.14979	3.2182	4.07326
4.94792	3.2916	4.10448
4.99591	2.94206	4.23736
5.19378	2.82355	4.11069
5.22793	2.83542	4.13379
5.18983	2.85528	4.12065
5.15575	2.80185	3.90697
5.21962	2.98592	4.0683
5.19242	3.00301	4.21669
5.08793	2.87753	4.13736
5.18888	2.65825	4.15332
5.26472	2.65776	4.29882
5.04576	2.72618	4.09657
5.11677	2.87006	4.04731
5.09315	2.91986	4.04891
5.09797	3.02074	3.97209
5.22746	2.95325	4.11069
5.04863	3.14791	4.12946
5.10778	3.07348	4.15403
5.1007	3.0349	4.37878
5.07587	3.04234	4.04568
5.03838	2.83742	4.10519
5.08419	2.83536	3.86291
5.02497	2.85548	4.03184
5.26716	2.73396	4.23569
5.1021	2.81343	3.86482
5.13516	2.71346	4.0282
5.12148	2.78127	4.30434
5.11057	2.93009	4.21159
5.03643	2.84268	4.32123
5.16458	2.71183	4.13477
5.05179	2.92856	3.98275
4.90428	2.90155	3.98893
4.98225	3.07273	3.84601
5.12184	2.89773	4.01015
5.06055	2.74261	3.97765
5.07538	2.84274	3.63527
5.14433	3.16638	3.74667
5.16475	3.01833	3.75897
5.18075	2.68784	3.84488
5.22127	2.71669	4.26451
5.07767	2.60179	4.26377
5.11707	2.80191	4.30778
5.01482	2.77489	4.16923
5.05931	2.84607	4.3785
5.12174	3.07557	4.46804
5.15122	2.92496	4.45783
5.31284	2.98268	4.06281
5.02691	2.86648	4.10073
4.94569	2.81491	3.93255
5.17742	3.04128	4.03666
5.10449	3.01739	4.23422
5.15983	3.01604	4.01855
5.07878	2.78323	4.00014
5.01066	2.76364	4.11439
5.03351	2.86832	4.16834
4.91284	2.91244	3.98431
4.98982	2.8085	4.20102
5.10454	3.01327	4.18283
4.97952	2.77666	4.12663
4.85987	2.84654	4.13047
5.00828	2.93932	3.90474
5.03669	2.96856	3.97574
5.06991	2.62914	4.08954
5.04777	2.65956	4.05073
5.06414	2.61806	3.89061
5.13158	2.72847	3.8726
4.97484	2.56958	3.94494
5.01112	2.6302	3.89951
4.91213	2.77221	3.89365
4.86502	2.65243	4.12606
4.91455	2.65268	4.20374
5.08186	2.77944	4.16104
5.14105	2.94781	4.20213
4.98188	2.9304	4.25424
5.16973	2.82749	4.317
5.13268	2.70251	4.02093
5.0195	2.6751	3.98947
5.11665	2.69928	4.11199
5.03705	2.89731	4.24979
5.10013	2.76256	4.28093
5.06283	2.62422	4.12517
5.11295	2.83993	4.29632
5.03147	2.97576	4.29135
5.08845	2.99941	4.15248
4.97322	2.92359	4.30248
5.05848	2.81963	4.14092
5.01044	2.86649	4.2777
5.03925	2.86599	4.01575
4.97826	2.99495	3.90291
5.03001	2.90881	4.10923
4.95632	3.00077	3.9659
4.99904	2.94164	4.03593
4.94236	2.93572	4.06284
4.86762	2.86024	4.18442
4.96628	2.83951	3.91407
5.07178	3.03301	4.07417
4.87698	2.7338	4.0934
4.91504	2.87234	4.11606
5.00794	2.70051	4.08009
5.04412	2.89254	4.29377
5.14712	2.95996	4.02056
4.97008	2.97233	4.12631
4.96655	2.76494	4.03024
4.87325	2.85713	4.2131
4.83299	2.89088	4.23854
4.90302	2.65291	4.25
4.7818	2.7226	4.34267
4.91918	2.64123	4.19927
5.01892	2.6041	4.02649
5.00516	2.61066	4.17175
5.10871	2.35713	4.30509
5.11412	2.56483	4.32078
4.99496	2.95127	4.13138
4.9381	3.09141	4.2742
4.93403	2.92266	4.1834
4.86739	2.87701	4.29704
4.88334	2.8474	3.92239
4.92005	2.79571	4.19955
4.89935	2.73969	4.24165
4.91595	2.77053	4.11571
4.82499	2.79693	4.15713
4.972	2.63074	4.13853
5.07756	2.42951	4.13125
5.02223	2.51153	3.97967
5.0138	2.46784	3.90342
5.10772	2.62655	4.0434
5.13965	2.67203	4.25991
5.09508	2.59622	4.20861
4.95641	2.89281	4.16021
4.96491	2.81371	4.22812
4.90159	2.90426	4.06554
5.04196	2.84972	4.27436
5.10836	2.65555	4.23408
5.00487	2.76754	4.1715
4.91206	2.62967	3.902
5.01936	2.61754	3.85446
5.01732	2.54839	3.9421
4.98469	2.51362	3.81858
4.95443	2.81627	3.66887
4.96322	2.60418	3.80697
4.88822	2.78728	3.95303
4.8467	2.91458	3.87076
4.99477	2.81599	3.90556
5.02341	2.83608	3.76006
5.01881	2.93985	3.78414
4.9313	2.91082	3.77696
4.94019	3.09776	3.7906
5.09391	2.96273	3.86505
5.11079	2.94569	3.83958
4.95502	2.65892	3.9628
4.94756	2.68997	4.03659
4.92821	2.79984	4.04097
4.88742	2.90951	4.00705
4.89357	2.7123	3.89668
4.83741	2.65596	3.96048
4.98704	2.54717	3.89078
4.96604	2.61484	3.8789
5.03227	2.75051	4.08688
5.20952	2.5248	3.97521
5.10545	2.6427	4.03629
5.2093	2.7224	4.02084
5.14811	2.61658	3.99318
4.96009	2.73157	3.98307
4.80448	2.85133	4.00236
4.75046	2.64863	4.05563
4.80978	2.66643	3.93907
4.85169	2.57751	3.87158
4.80229	2.51407	3.92096
4.85859	2.7567	4.12164
4.93401	2.98924	4.23592
4.93333	2.80096	4.05407
5.01273	2.84036	3.97297
5.02811	2.73926	3.75952
4.95398	2.62004	3.86864
5.01985	2.66424	3.98318
4.96335	2.59649	3.95857
4.95935	2.67551	3.98351
4.90318	2.74824	3.96975
5.0901	2.61888	3.87842
4.92734	2.76659	3.9425
4.99195	2.65736	3.90819
5.03775	2.64945	3.96881
5.1027	2.72104	4.01301
5.06218	2.65165	3.87193
5.12024	2.8108	3.91339
5.112	3.03248	4.13554
5.10374	2.79148	3.96549
5.04127	3.0256	3.87886
4.99108	2.92071	3.90114
4.98655	2.74668	4.02642
4.89554	2.58918	4.0813
4.94741	2.68199	4.03512
5.03676	2.68563	3.93956
5.14082	2.42689	4.05306
5.04813	2.63538	4.16806
4.97036	2.78165	4.21277
4.97871	2.80906	4.09877
5.02481	2.86765	4.01723
5.06969	2.79878	3.80248
5.07564	2.77441	3.85098
5.08266	2.78964	3.85843
5.04019	2.73549	3.91192
5.08858	2.876	4.03232
4.98548	2.6307	3.95696
5.06475	2.60082	4.05212
5.12353	2.71367	4.12735
5.09274	2.48483	4.02069
5.15899	2.59243	4.06938
5.06155	2.61347	3.82586
5.01532	2.5502	3.79271
4.9932	2.47716	3.85695
4.96272	2.5059	3.64854
4.95951	2.65346	3.86909
5.04821	2.90282	3.83425
4.97715	2.92686	3.95594
5.05311	2.93116	4.01354
5.04347	2.81015	4.1692
5.08984	2.6363	4.19328
5.09421	2.73614	4.10541
5.11263	2.6582	4.02362
5.15742	2.4889	3.89502
5.04948	2.71634	3.85657
5.02797	2.84471	3.85713
4.96082	2.76002	3.85905
5.00276	2.8099	3.78195
5.09116	2.58272	3.81181
5.10745	2.70481	3.83112
5.1737	2.68483	3.9485
5.1838	2.54003	3.93366
5.13495	2.72852	3.9861
5.07608	2.6805	4.02406
5.17949	2.72052	3.99396
5.17696	2.76161	3.933
5.14936	2.70848	4.05768
5.13114	2.59075	3.94092
5.0552	2.68202	4.02671
5.1054	2.75751	4.02482
5.19378	2.93579	4.01813
5.14113	2.8818	4.0114
5.11888	2.99005	3.86273
5.08976	2.92675	3.91967
5.08875	3.13328	3.88042
5.0953	2.97864	3.9822
4.98751	2.89859	3.96905
4.94785	2.7886	3.95148
5.01033	2.81783	4.00628
5.0254	2.82513	3.94124
4.9971	2.75561	3.87258
4.98706	2.81662	3.97289
4.95636	2.65588	3.9435
4.93782	2.66614	3.98946
5.02269	2.51026	3.98102
5.0441	2.64407	3.96337
5.03642	2.65657	3.75341
5.04848	2.4443	3.88781
5.12443	2.56466	3.8124
5.02388	2.77549	3.96992
5.06249	2.60021	4.03202
5.0173	2.44808	3.9335
5.09532	2.61701	3.94767
5.07844	2.45572	3.96979
5.02119	2.43043	3.99758
5.12417	2.53564	4.01691
5.22553	2.36226	4.09285
5.23964	2.61075	4.13623
5.13772	2.58728	4.06052
5.08354	2.79986	3.95249
5.07292	2.56105	3.88904
5.06887	2.55568	3.94915
5.07324	2.80595	3.93106
5.04607	2.88022	3.88571
5.0462	2.83831	3.95601
4.96959	2.74063	3.96603
5.00594	2.9111	3.95103
4.97287	2.78915	4.03441
4.93969	2.70801	3.9846
5.05824	2.76919	4.01641
5.01823	2.85224	3.97656
5.07598	2.79379	3.76003
5.0844	2.61766	3.78525
5.05439	2.56489	3.88726
4.97146	2.67447	3.98675
5.04591	2.62914	3.90465
4.99299	2.69497	4.00549
5.00079	2.88534	3.80766
5.01857	2.89013	4.01506
5.03459	2.6528	3.96903
5.11148	2.80507	3.89188
5.04195	2.7636	3.91851
5.11454	2.68017	3.93272
5.0517	2.65638	4.12078
5.00198	2.57129	4.18238
5.02085	2.48792	4.08831
5.08429	2.64989	3.98973
5.15516	2.6865	3.98953
5.06742	2.8	4.1304
5.05619	2.763	4.11627
5.07995	2.78548	4.12813
5.1684	2.78644	4.03905
5.10501	2.54243	4.15054
5.13103	2.45799	4.10804
5.13879	2.55239	4.00761
5.164	2.19357	4.05229
5.05898	2.3219	3.96266
5.07479	2.3636	3.95279
4.91428	2.58813	3.94987
4.89086	2.63165	3.9773
5.00716	2.41297	3.93856
4.95866	2.57825	3.77407
4.96338	2.76019	3.97864
5.00256	2.72452	3.90785
5.10137	2.74486	3.7416
5.08564	2.52035	3.90597
5.08419	2.3964	3.91657
4.99436	2.34147	3.94432
5.00146	2.43328	3.91094
4.97399	2.27856	3.92582
4.9672	2.48677	3.87275
4.91988	2.4924	3.77845
5.02611	2.69228	3.79194
5.07222	2.58988	3.81367
5.03097	2.46437	4.04176
5.00508	2.62918	3.83103
5.03531	2.73895	4.00429
5.02037	2.84538	3.95902
4.98501	2.75603	3.88319
5.0957	2.6133	4.10723
5.15098	2.49494	4.14018
5.00356	2.33326	4.19454
5.10637	2.33736	4.02587
5.13881	2.43355	4.13135
5.08305	2.59429	4.10799
5.10531	2.71275	3.95977
5.12789	2.67465	3.84254
5.10613	2.82596	3.751
5.12862	2.88571	3.87066
5.13594	2.50928	3.82678
5.0601	2.47713	3.72692
4.94654	2.6598	3.82391
4.96156	2.89599	3.78519
4.99415	2.53578	3.83326
4.99514	2.6276	3.94465
4.94827	2.51758	3.98368
5.05375	2.62177	4.08587
5.10888	2.49107	4.11214
5.00955	2.66954	3.93407
4.96321	2.79882	3.96672
5.13755	2.6658	3.95894
5.08647	2.6357	3.97445
5.1037	2.66478	3.95473
4.96662	2.52036	3.75457
4.90347	2.63475	3.95707
4.9513	2.69433	3.92996
4.9341	2.67143	4.009
4.94062	2.683	4.10482
5.05509	2.65519	3.92166
5.03769	2.74918	3.82115
4.95766	2.73416	3.88298
4.92987	2.76794	3.9109
4.99613	2.76971	3.93112
5.00687	2.78988	3.9819
4.99939	2.82437	3.831
4.97234	2.61648	3.92395
4.91109	2.68675	3.79173
4.91318	2.5708	3.93992
5.01236	2.80604	3.8919
5.03008	2.77144	3.89221
4.92309	2.8951	3.90234
4.99675	2.71159	3.91239
4.95492	2.47706	3.94273
5.00331	2.55028	3.93697
4.94729	2.78703	3.92257
5.04811	2.76239	4.02001
5.0467	2.77272	4.02296
4.99092	2.83336	4.00994
4.96529	2.76798	3.92891
4.97452	2.67426	4.00475
5.0492	2.64316	3.96212
5.00199	2.68387	4.03421
4.99223	2.71448	3.96536
5.10548	2.66414	3.9882
5.1375	2.57832	4.10245
5.04459	2.68014	4.08925
5.09575	2.61828	4.05243
5.09093	2.58602	4.0159
5.03216	2.68407	4.00544
4.96953	2.83489	3.82839
4.92825	2.74411	3.73663
4.89588	2.48653	3.85869
4.93194	2.5824	3.91175
5.0148	2.62902	3.80782
5.06033	2.71105	3.87417
5.05517	2.91962	4.00503
4.96529	2.77637	4.0711
4.93262	2.84505	4.05517
5.07906	2.89702	4.01683
4.99104	2.69795	4.05115
5.00559	2.59761	3.88649
4.9817	2.51145	3.91612
4.98997	2.71611	4.08331
5.11028	2.61115	3.95779
5.01194	2.64771	4.02514
4.96734	2.74876	3.93726
5.03131	2.82545	3.98179
4.95973	2.71276	4.13639
4.92754	2.47899	4.0218
4.9816	2.57796	3.98299
5.03776	2.57363	3.90498
5.05284	2.58217	3.90014
4.96315	2.54268	3.88214
5.01567	2.63207	3.98752
5.06517	2.58932	3.99525
5.01617	2.59776	4.06636
5.08885	2.59033	3.97172
5.08186	2.61158	4.11907
4.97952	2.72035	4.01752
5.02689	2.64643	3.96194
4.99802	2.45714	3.91303
4.97265	2.59086	3.90706
5.07381	2.74233	3.9788
5.07944	2.65363	3.89198
5.04938	2.65509	3.90823
5.06579	2.63391	3.96832
5.10942	2.65357	4.05097
5.12509	2.57942	4.08958
5.11136	2.47806	4.08705
5.13301	2.4119	4.07642
5.0533	2.62033	4.09471
5.00584	2.43751	4.04826
4.94703	2.65326	3.86681
4.98304	2.65526	3.9506
4.90433	2.67095	3.94914
4.93025	2.73008	4.06145
4.94898	2.67584	4.18628
5.01704	2.5561	4.18706
5.02925	2.81407	4.17215
5.07212	2.62682	4.10705
5.08039	2.49299	3.88526
5.11582	2.69808	3.93458
5.07792	2.8148	3.96067
5.07167	2.66398	4.06254
5.01953	2.62574	3.89097
4.98768	2.67795	3.9325
4.92201	2.67153	3.974
5.00099	2.77236	3.82038
4.96447	2.72834	3.95726
5.02402	2.77725	4.0817
5.01949	2.80423	4.04485
5.03733	2.87821	4.0761
5.10916	2.90662	4.04122
5.17892	2.67625	4.04912
5.08315	2.70367	3.94919
5.11866	2.82729	3.92043
5.0643	2.73898	3.90582
5.05244	2.66063	3.96589
4.97287	2.61783	4.00463
5.00212	2.5699	4.01768
5.03131	2.67844	4.00627
5.01643	2.69146	3.95893
5.02244	2.56193	4.01331
5.01881	2.69708	3.99915
5.06166	2.67185	3.95239
5.04576	2.71333	3.8916
5.10795	2.75489	4.00797
4.97634	2.69525	4.03533
4.9372	2.60697	3.92954
4.96696	2.48053	4.02176
4.90793	2.60424	4.03182
4.8509	2.56565	4.01308
4.96059	2.4618	4.11625
4.99288	2.53198	4.02996
4.95204	2.50693	4.01016
5.07858	2.71153	3.93717
5.09854	2.6475	3.9147
5.02248	2.86068	3.91423
4.99054	2.71205	4.01374
5.01404	2.7734	3.92051
5.02181	2.81957	3.97224
4.96823	2.79265	4.06751
5.06064	2.74097	4.00409
4.98573	2.73811	3.92637
5.01895	2.69872	3.86617
5.04521	2.48987	3.81464
5.08229	2.66064	3.93131
5.0591	2.63027	3.91913
4.9697	2.50318	3.9503
5.00946	2.56162	3.86832
5.05955	2.78685	3.92946
5.01336	2.7765	3.85869
5.02586	2.80768	3.94079
4.95974	2.88794	3.96297
4.93832	2.65321	3.98022
4.9426	2.70725	4.01984
5.03675	2.94015	4.17115
5.03429	2.85626	4.18445
5.02558	2.80283	4.12208
5.0736	2.75593	4.00546
5.08084	2.52454	4.05227
5.08751	2.49454	4.11928
5.116	2.75049	4.02477
5.03348	2.91559	3.91902
5.09199	2.61384	3.9683
4.96839	2.48855	3.94768
4.97505	2.51738	3.95526
5.08912	2.78062	4.04825
4.9898	2.64655	3.94438
4.98135	2.80226	3.99623
4.95632	2.81805	3.88274
4.99225	2.70395	3.85823
4.97816	2.7331	4.01302
5.03996	2.77253	3.92404
5.02481	2.77982	3.9576
4.98106	2.74772	4.0754
5.01919	2.71283	3.98368
5.04315	2.60832	4.09262
5.1304	2.65446	4.00799
5.12531	2.55796	3.99534
5.06126	2.68549	3.97342
5.08712	2.59378	3.81713
5.0992	2.56001	3.89829
5.04182	2.67457	3.95398
5.07804	2.67465	3.90289
5.07078	2.65694	3.94862
5.03402	2.68619	3.95153
4.96382	2.73891	3.91246
4.97319	2.68074	3.9491
5.04082	2.68991	3.97362
4.99755	2.65481	3.97643
5.0681	2.726	3.99557
5.06776	2.77693	4.03759
5.00168	2.73314	3.93945
5.04208	2.85381	3.92984
5.0246	2.69212	3.83535
5.02551	2.58803	3.84264
5.06349	2.79721	3.86915
5.00748	2.75002	3.83197
5.05205	2.77217	3.88576
5.08671	2.69876	3.96524
5.03196	2.77137	3.9526
5.0185	2.70477	4.0066
5.07824	2.66953	4.00623
5.06963	2.64929	4.02888
5.04657	2.58778	4.04144
5.06042	2.5178	3.9346
5.06582	2.66209	3.82562
5.01876	2.53813	3.86362
5.00753	2.54768	3.89282
5.06234	2.80045	3.95032
5.04754	2.78804	3.93431
4.9709	2.50393	4.07443
5.0398	2.54677	4.06741
5.08592	2.82019	4.0023
5.10568	2.78524	4.04168
5.07321	2.50247	3.86641
5.06851	2.73385	3.90573
5.08457	2.8076	3.88939
5.05223	2.94863	3.94355
5.08037	2.86277	3.86861
5.06964	2.89928	3.9368
5.0809	2.87147	3.88028
5.09279	2.71134	3.9224
5.05544	2.62244	3.84456
4.97991	2.53993	3.96434
5.04386	2.52234	3.96051
5.03329	2.61002	3.98617
4.97054	2.83823	3.97927
4.98019	2.75669	3.91885
4.95699	2.59972	3.93871
4.99583	2.61565	3.8052
4.97235	2.47307	3.87882
4.98878	2.58993	3.85907
5.02316	2.60035	3.87038
5.07058	2.63734	4.00122
5.1193	2.7776	4.02062
5.11418	2.91613	3.93333
4.99794	2.70799	3.87892
5.05725	2.62222	3.9889
5.15317	2.63742	4.1227
5.12583	2.58364	4.10616
5.05358	2.65741	3.9595
5.00622	2.4357	3.97078
5.13591	2.51857	3.9461
5.15483	2.64647	3.85672
5.0962	2.61772	3.83452
5.16307	2.73602	3.69744
5.05074	2.77767	3.7568
5.08487	2.62819	3.7681
5.13002	2.64826	3.76301
5.10626	2.59132	3.95831
5.14731	2.60087	3.88244
5.13307	2.71305	3.95276
5.12114	2.72771	4.00761
5.10991	2.52039	4.07125
5.02047	2.68888	4.07632
5.01491	2.80869	3.96483
5.02702	2.85197	3.86284
5.01126	2.70668	3.93129
5.02129	2.64765	3.87656
5.04981	2.69196	3.88521
5.03647	2.55625	3.89327
5.01593	2.72998	3.85217
5.10474	2.91853	3.86142
5.05674	2.79816	3.8954
5.0395	2.78701	3.9021
5.09757	2.91701	3.84184
5.01864	2.85171	3.94546
5.10325	2.85165	3.93567
5.08548	2.74292	3.96238
5.06098	2.60001	3.96702
5.10953	2.64639	3.93689
5.13162	2.66298	3.96108
5.15351	2.74182	4.06555
5.0517	2.64917	3.99839
5.05622	2.55291	3.95595
5.06203	2.59157	3.93098
5.01343	2.61364	3.93244
4.99242	2.66196	3.87349
4.95984	2.7192	4.03419
4.974	2.82529	3.97841
5.01964	2.72452	3.86446
5.02129	2.87976	3.7486
5.06137	2.62989	3.77689
4.95014	2.62558	3.82006
4.9959	2.50888	3.86415
5.02257	2.57853	3.90229
5.13223	2.77056	3.86921
5.1193	2.85801	3.96161
5.08679	2.94856	3.9784
5.07225	2.96286	3.94858
5.06841	2.94362	3.95081
5.05494	2.91168	3.86797
5.09345	2.83217	3.85837
5.1354	2.81878	3.8865
5.08486	2.94617	3.98941
5.11517	2.85306	3.98967
5.0771	2.68657	3.93921
5.10239	2.92347	3.9558
5.10241	2.75078	4.01635
5.18972	2.86294	3.7816
5.09245	2.83119	3.7307
5.08721	2.76625	3.79405
5.0406	2.67447	3.78691
5.06015	2.80319	3.87872
5.07007	2.67741	3.90058
5.03324	2.7047	3.97773
5.08981	2.75646	3.99401
4.96954	2.72731	4.0227
5.0125	2.77028	4.02682
5.02445	2.79585	3.92857
5.0023	2.52249	3.98673
5.06068	2.56966	3.9439
5.00355	2.64104	3.93522
4.9673	2.56326	4.04987
5.03498	2.44614	3.94259
5.02508	2.58203	3.96713
5.03303	2.65053	4.02728
4.96574	2.76544	3.92552
5.00727	2.68957	4.05786
4.9638	2.67433	4.02521
5.04615	2.86076	3.94583
5.08032	2.77395	4.04689
5.04029	2.89379	3.9962
5.02956	3.0309	3.96403
5.03765	2.82282	3.99507
5.03391	2.77233	3.93787
5.03057	2.71529	3.83888
5.07182	2.81938	4.00537
5.02435	2.76961	3.87151
4.99621	2.57955	3.86805
4.98618	2.50543	3.94831
4.98696	2.58842	3.91413
4.9879	2.76962	3.89007
5.01312	2.95714	3.9349
4.99824	2.72446	3.89605
5.01853	2.77038	3.90541
5.01284	2.83291	3.94719
4.98629	2.77397	3.87388
4.98782	2.67858	3.96563
5.02725	2.81218	3.99341
5.04746	2.82024	3.91631
5.01491	2.55151	3.92071
5.01489	2.65108	3.92099
5.01283	2.63226	3.88202
5.00809	2.56669	4.00299
4.99204	3.05968	3.94289
5.02324	2.90668	4.05025
5.06695	2.87703	4.01958
5.10903	2.93124	3.99774
5.04403	2.87263	4.02483
5.07426	2.96746	3.96064
5.1015	2.84145	3.98297
5.0787	2.68994	3.97325
5.02385	2.77515	3.93931
5.04198	2.56548	3.9469
5.05333	2.57602	3.93551
5.08343	2.44248	3.99769
5.01422	2.46393	3.97164
5.00437	2.73754	3.9963
5.03112	2.73639	4.05112
5.04129	2.53585	3.98642
4.99256	2.7125	3.91589
5.0232	2.84269	3.80906
5.09585	2.73589	3.82935
5.03664	2.83892	3.87736
5.0314	2.8105	3.77073
5.0187	2.65673	3.7395
5.06619	2.63043	3.79361
5.01736	2.83793	3.81312
4.96855	2.57772	3.81156
4.99561	2.71378	3.86039
4.9707	2.59772	3.93605
5.04783	2.73912	3.91399
5.00601	2.66284	3.96431
5.0254	2.60312	3.93685
5.0531	2.76593	3.91697
5.04351	2.82402	3.95102
5.09906	2.71222	3.89501
5.03595	2.6175	3.86117
5.00038	2.68668	3.82765
5.00229	2.6688	3.84713
4.95862	2.64774	3.88998
4.95645	2.60196	3.95795
5.02552	2.68623	3.99964
5.04938	2.75389	3.96836
5.03987	2.75645	3.90794
5.0617	2.65102	3.99907
5.09777	2.65497	3.95865
5.03835	2.78887	3.94903
5.00945	2.64464	4.02715
5.00998	2.60236	3.92515
5.01164	2.64749	3.96117
5.0098	2.58063	3.87626
5.00715	2.73375	3.96268
4.98047	2.91075	3.92882
4.99353	2.8027	4.0246
4.95582	2.70722	3.91242
4.9829	2.68157	3.95179
5.01449	2.60836	3.97879
5.01073	2.78866	3.93931
4.98239	2.76735	3.83593
5.02229	2.70897	3.7876
5.02933	2.658	3.9251
5.01557	2.57461	3.9402
4.98015	2.70054	3.82945
4.98596	2.78096	3.87713
5.02092	2.7793	3.96002
4.96996	2.77058	3.98049
5.01367	2.7833	3.99666
4.98318	2.80688	3.94883
4.96601	2.75513	3.87096
5.00607	2.5645	3.95974
4.95469	2.68661	3.8074
4.93537	2.71466	3.87101
5.02556	2.80729	3.87378
4.99302	2.70486	3.83815
5.02921	2.54852	3.91868
5.0376	2.65772	3.81722
4.99786	2.66241	3.75853
5.01605	2.75855	3.7631
5.01304	2.5362	3.84304
5.07789	2.557	3.82147
5.06648	2.52657	3.96616
5.0108	2.54837	4.07068
4.97642	2.7524	3.93261
4.99606	2.87519	4.03591
5.01485	2.92392	3.98727
4.99026	2.84683	4.0259
4.99319	2.72714	3.95597
5.01602	2.74841	3.97543
4.99068	2.88777	3.98285
5.05283	2.64356	3.97497
5.03788	2.71297	3.91422
5.07878	2.74778	4.04217
5.07237	2.75976	3.95813
5.0765	2.84172	4.00543
5.07586	2.87526	4.08852
5.03697	2.78602	4.01948
5.10389	2.80941	3.99848
5.01849	2.68775	4.02249
5.01887	2.70868	4.0885
5.04274	2.70868	3.94638
5.02156	2.68439	3.89822
5.02029	2.63651	4.0026
5.01868	2.7252	3.98439
5.04307	2.78266	4.00652
4.96359	2.76568	4.01323
4.95283	2.73309	4.02458
4.99922	2.81943	4.11927
4.95324	2.73833	4.03228
4.99902	2.84462	3.95523
5.03694	2.69773	4.04698
5.0203	2.65852	3.97289
5.07298	3.00904	3.90788
5.00068	2.66304	3.85942
5.05161	2.70585	3.93685
5.07271	2.67953	3.96221
5.03342	2.83235	3.96453
5.03287	2.91148	4.06098
5.03544	2.70894	3.98188
5.00889	2.72476	4.0072
5.03564	2.70295	3.97856
5.01262	2.70221	4.04123
5.07873	2.75679	4.05155
5.01679	2.69437	3.97091
4.97087	2.7795	4.00397
5.00098	2.77348	3.99165
4.9966	2.74251	4.09646
5.01118	2.72306	3.98296
4.99067	2.63142	4.03426
5.00163	2.71527	4.06796
5.03244	2.74675	4.19625
5.01819	2.75558	4.08145
5.00905	2.81169	4.08101
5.02536	2.6507	4.05864
4.99424	2.75448	4.01661
5.05209	2.68386	4.11725
5.00866	2.62196	4.05085
5.0065	2.6681	4.18421
5.02745	2.63912	4.15408
5.05138	2.77208	4.14321
5.03434	2.65869	4.16404
5.00429	2.53642	4.15073
5.0394	2.46242	4.08575
5.04792	2.54615	3.99934
5.02687	2.55634	4.0145
4.98408	2.71032	3.98269
5.07529	2.61759	3.99814
4.98935	2.64197	3.97022
4.95485	2.62595	3.97451
4.98002	2.558	4.00579
4.93482	2.65059	4.03218
4.94371	2.61558	4.07075
4.935	2.59701	4.06661
4.94044	2.55785	4.05493
4.96394	2.51474	4.00777
5.01008	2.60307	4.08817
4.99521	2.6651	4.00232
4.98128	2.73767	3.99907
5.0454	2.72206	3.93404
5.01359	2.6458	3.91226
5.06251	2.54299	3.94869
5.0237	2.69449	4.04806
5.05339	2.80717	4.08253
5.03807	2.70513	4.0888
5.02733	2.73293	4.0091
4.9842	2.64605	3.99568
4.99484	2.679	3.97582
5.00568	2.61472	4.08917
5.00445	2.58263	4.03463
5.06692	2.71977	4.13473
5.0491	2.74189	4.02919
5.06056	2.74636	4.0362
5.09012	2.8435	3.97494
5.02166	2.87303	4.04958
4.99101	2.71432	4.04831
4.96914	2.76523	4.08263
5.01151	2.6965	3.99695
5.04754	2.80111	3.96182
4.97103	2.64996	4.06856
4.99994	2.66355	4.02432
4.98044	2.54326	3.98592
4.99647	2.55566	3.95127
5.00141	2.64256	3.99654
4.98573	2.73126	4.0791
4.98013	2.63976	4.06213
4.97668	2.62838	4.06002
4.96272	2.51337	4.01033
4.9506	2.53154	4.01757
4.99718	2.56146	4.04168
5.00032	2.62421	3.92153
5.06689	2.65251	4.03869
5.07166	2.68094	4.00702
5.12495	2.6247	3.99029
5.10883	2.67522	3.99145
5.02585	2.63242	3.95293
5.08828	2.52567	3.9398
5.05187	2.61363	4.03855
4.99322	2.61906	4.03961
4.98816	2.60584	3.99313
5.04425	2.61835	4.06131
5.04511	2.58969	4.02665
5.0627	2.61631	3.97009
5.10122	2.71918	4.00268
5.06854	2.78592	4.0985
5.05252	2.70563	4.10662
5.04878	2.63099	4.02244
5.06184	2.58515	4.09285
5.01845	2.48945	4.06644
5.01404	2.4377	4.10585
5.02738	2.45139	4.04913
5.02981	2.48263	3.97518
5.02599	2.6253	3.97498
5.0269	2.57226	3.97253
4.99395	2.61831	4.03283
4.9791	2.71482	4.03098
5.02789	2.59952	4.11347
5.01135	2.56653	4.1172
5.06699	2.48344	4.09379
5.00543	2.48932	4.18662
4.97799	2.73448	3.96811
4.98278	2.61082	4.01992
5.01096	2.59713	3.94913
5.04066	2.67427	4.01091
5.01431	2.72037	4.11492
5.03564	2.83392	4.05293
5.04101	2.77527	4.00691
5.07696	2.67792	4.03583
5.05107	2.68851	4.14319
5.02898	2.87521	4.05314
4.98845	2.72966	4.07166
5.01565	2.58008	4.08693
4.9762	2.71376	4.0911
4.9679	2.68023	4.0781
5.01012	2.66418	3.99129
4.99635	2.68568	3.91309
4.9968	2.50334	3.94962
4.98348	2.49256	3.93534
4.97224	2.42968	3.93635
4.98722	2.60259	4.02013
4.99904	2.54161	4.04397
5.02868	2.57078	4.00051
5.03682	2.57499	4.06331
4.98993	2.55959	4.01521
4.95544	2.54619	4.08458
5.0227	2.53638	4.11304
5.02915	2.43566	3.94558
5.02838	2.57868	3.97913
5.03699	2.64846	4.03803
5.01658	2.61898	3.96035
5.0601	2.611	3.92931
5.06268	2.70454	4.01512
5.05397	2.69833	4.07258
5.06452	2.64663	4.08071
5.03039	2.67119	4.00309
4.98415	2.6687	4.05152
5.00588	2.61226	4.0761
4.99737	2.57651	4.06316
5.03529	2.75209	4.0773
4.99087	2.77553	4.00422
5.00458	2.71386	4.06962
5.0474	2.70498	4.10452
5.00789	2.60798	4.07616
5.01072	2.60486	3.97869
5.01463	2.64057	3.88739
5.03958	2.68375	3.89781
5.03791	2.6556	3.87068
5.04816	2.55935	3.88337
5.02381	2.56553	3.93382
4.99588	2.61571	3.92141
5.01384	2.62603	3.94649
5.01333	2.64189	3.94269
4.96122	2.63596	3.94322
5.02224	2.7665	4.0703
4.97563	2.70239	4.00771
4.96951	2.68311	4.03487
4.96332	2.77344	4.05823
4.98072	2.73855	4.0134
4.98814	2.67455	4.01455
4.98971	2.80319	4.00857
4.97942	2.80852	3.94585
4.98753	2.70223	3.91192
5.02479	2.61882	3.91677
5.00069	2.71911	4.01699
4.99574	2.75313	4.06266
5.00136	2.69725	4.0966
4.95335	2.73052	4.05965
4.96592	2.72512	4.01709
4.97253	2.7357	3.99989
4.94658	2.60091	4.04291
4.94252	2.80024	3.96036
4.99904	2.68507	3.99683
5.01412	2.6484	3.97375
4.98432	2.56774	3.94121
4.93661	2.56768	3.95606
4.94787	2.72867	3.928
5.02084	2.56078	3.90244
5.01505	2.66199	3.87458
5.0375	2.68344	3.9558
5.04654	2.65957	3.98707
5.00956	2.80955	4.068
5.01046	2.79431	4.08045
4.99953	2.72462	3.94052
5.02594	2.74255	3.9356
5.01938	2.71164	3.99687
5.01436	2.65763	3.98419
5.03882	2.59887	3.94329
4.98234	2.61351	3.94011
4.973	2.60645	3.91136
4.94377	2.58105	4.00083
4.9694	2.6096	3.97083
4.99375	2.68028	3.95758
4.97686	2.62601	3.91464
4.9742	2.71134	3.99526
4.98853	2.78822	3.96656
4.9632	2.72849	4.02684
4.94663	2.7102	4.08081
4.97243	2.63372	3.98232
4.99108	2.61833	3.93554
4.98387	2.67437	3.99316
4.90029	2.74413	3.96222
4.91964	2.65523	4.00978
4.93733	2.69115	4.01107
4.91957	2.68858	4.09218
4.92517	2.66441	4.05412
4.92504	2.71458	4.03645
4.91307	2.7187	4.03558
4.99661	2.63171	3.9528
4.99264	2.53459	4.02132
4.96669	2.61561	3.95052
4.89599	2.66012	3.92938
4.99677	2.6658	4.01041
4.99491	2.68272	3.94267
5.02347	2.67743	3.88299
5.02839	2.6349	3.98417
5.00272	2.59208	4.00072
4.96748	2.69977	4.01541
4.95536	2.69991	3.92788
4.97021	2.67456	4.00641
4.94675	2.72431	4.01368
4.96531	2.68305	3.90487
4.98776	2.65414	3.9144
4.89048	2.65062	3.91236
4.92978	2.54344	3.84278
5.00994	2.55886	3.8888
5.01581	2.48274	3.88709
4.98474	2.61853	3.99931
4.92567	2.72631	3.95054
4.9377	2.7231	3.91475
4.95442	2.63439	3.96776
4.94788	2.64352	3.98417
4.95541	2.71618	3.92796
4.91889	2.70042	4.03519
4.95931	2.71773	4.0388
4.97006	2.69583	4.06791
4.91068	2.65689	4.08475
4.84979	2.61971	4.01131
4.89932	2.66768	3.9919
4.94884	2.69419	3.99006
4.89988	2.65944	3.95504
4.96068	2.75767	4.00408
4.98506	2.73506	3.95894
4.99071	2.78608	3.9757
4.92572	2.82723	3.94484
4.93372	2.68823	3.95884
4.95212	2.65514	4.01572
4.9266	2.58026	3.94206
4.93865	2.59742	4.0136
4.93198	2.57231	4.01609
4.90171	2.59632	3.96086
4.91893	2.58374	4.01526
4.96605	2.68907	3.90486
4.99439	2.71459	3.93488
4.99536	2.73897	3.95646
4.97841	2.72447	3.98222
4.94038	2.6797	3.99694
4.98235	2.63632	4.00379
4.90377	2.65503	3.93991
4.90973	2.60526	3.96845
4.92208	2.55303	4.03589
4.88802	2.58254	4.03906
4.91287	2.6231	3.97057
4.93351	2.61488	3.93769
4.96695	2.62111	4.03194
4.96655	2.76777	4.05137
4.9773	2.72597	4.02622
4.93134	2.61812	3.99221
4.94421	2.78632	3.92228
4.91034	2.80014	3.8884
4.91035	2.7869	3.90255
4.91249	2.72665	3.91814
4.90421	2.64457	3.92524
4.88447	2.56743	3.97753
4.83466	2.62538	3.99257
4.91213	2.65846	3.97781
4.90534	2.63264	3.98342
4.90882	2.62895	4.01319
4.91678	2.55082	4.01931
4.95367	2.68595	3.99138
4.93044	2.81128	3.97629
4.95778	2.79182	3.90653
4.99936	2.83372	3.86822
4.94444	2.77872	3.92041
4.91436	2.66156	3.9412
4.91968	2.62991	3.93296
4.93212	2.74923	3.88885
4.92414	2.65889	3.94636
4.92324	2.61392	4.03391
4.87468	2.6149	4.01106
4.94746	2.7206	4.0373
4.95925	2.76978	4.10573
4.90888	2.78762	4.08779
4.94105	2.71511	4.02879
4.95751	2.73131	3.94534
4.98213	2.72024	3.97221
4.92113	2.76172	4.03555
4.92652	2.69299	3.9498
4.90894	2.59621	3.85694
4.92515	2.70189	3.97253
4.90053	2.65978	3.98171
4.84906	2.60394	4.00018
4.90462	2.68204	4.01788
4.94155	2.68028	3.94936
4.97582	2.58857	3.96692
4.91509	2.70544	3.95988
4.93941	2.63209	3.93925
5.00532	2.67056	3.92909
4.95803	2.75976	3.93512
4.95379	2.72894	3.81947
4.91729	2.79551	3.90036
4.93572	2.78831	3.89755
4.96293	2.7846	3.9754
4.9715	2.71398	3.96293
4.94638	2.62686	3.93888
4.92919	2.6372	3.92768
4.89643	2.72556	3.9602
4.95721	2.59253	3.95577
4.98239	2.5657	3.99011
4.94398	2.5205	4.02014
4.96958	2.67526	3.9993
4.89006	2.63945	4.01265
4.8885	2.62928	3.9217
4.89395	2.63124	3.92711
4.81715	2.77491	3.9706
4.87429	2.66241	3.82665
4.89953	2.65535	3.89006
4.93636	2.67492	3.92565
4.96545	2.69923	3.92602
4.93194	2.57009	4.01496
4.95412	2.6411	3.89833
4.84588	2.63092	3.92067
4.90227	2.63916	3.96356
4.90192	2.74066	3.93767
4.86883	2.64336	3.93825
4.92955	2.62395	3.93472
4.94395	2.70994	3.9674
4.96018	2.73897	3.95248
4.94173	2.72609	3.92283
4.90719	2.75723	3.94959
4.8786	2.76484	4.0279
4.91647	2.75329	4.00167
4.90605	2.71856	3.95135
4.82047	2.63594	3.85986
4.92641	2.67514	3.91152
4.94189	2.69282	3.93805
4.91637	2.70675	3.86704
4.91444	2.69141	3.86781
4.95705	2.65378	3.87382
4.95206	2.73235	3.91074
4.90621	2.77892	3.91206
4.9244	2.75494	3.92131
4.91153	2.71914	3.93488
4.89828	2.78115	3.95506
4.92612	2.729	3.9267
4.89544	2.67777	3.96481
4.91397	2.60977	3.93019
4.93159	2.66041	3.91028
4.89451	2.66882	3.95982
4.8951	2.69086	3.926
4.93957	2.67362	3.99007
4.95563	2.6249	4.05508
4.97102	2.61504	3.90799
4.95785	2.70144	3.91026
4.97629	2.59446	3.96075
4.87757	2.63095	3.94286
4.92355	2.5866	3.88382
4.90457	2.58374	3.91122
4.91119	2.62024	3.96155
4.88049	2.65418	3.9732
4.93105	2.72728	3.98663
4.94893	2.63048	3.97392
4.93304	2.61934	3.95765
4.91237	2.67221	3.94984
4.91952	2.61884	4.01488
4.90684	2.71186	3.98745
4.9113	2.5449	3.97587
4.93461	2.58798	3.93606

## Sheet: Reverse Ensembles
**Timescale = 0.4 ms
Buffer A (+OM)	Buffer B (no OM)	~50% Buffer A
1.95667	2.80154	2.57621
1.95667	2.80351	2.61282
1.95667	2.85787	2.60256
1.95667	2.82116	2.58505
1.95667	2.83498	2.5858
1.95667	2.76431	2.60268
1.95667	2.81949	2.60037
1.95667	2.78672	2.58287
1.95667	2.72687	2.62186
1.95667	2.74086	2.64848
1.95667	2.69418	2.62856
1.95667	2.74569	2.63497
1.95667	2.84993	2.63875
1.95667	2.82068	2.61888
1.95667	2.80825	2.62587
1.95667	2.83113	2.65353
1.95667	2.85902	2.63027
1.95667	2.81027	2.6392
1.95667	2.77278	2.6325
1.95667	2.77793	2.6253
1.95667	2.72185	2.60291
1.95667	2.73584	2.59715
1.95667	2.71355	2.58182
1.95667	2.82685	2.57953
1.95667	2.79613	2.60297
1.95667	2.77881	2.57119
1.95667	2.84837	2.57916
1.95667	2.82898	2.61757
1.95667	2.82082	2.64213
1.95667	2.81691	2.66267
1.95667	2.82144	2.66814
1.95667	2.80406	2.65686
1.95667	2.76342	2.60876
1.95667	2.8141	2.59285
1.95667	2.78123	2.58367
1.95667	2.75768	2.61058
1.95667	2.81981	2.61339
1.95667	2.79888	2.60733
1.95667	2.82299	2.62391
1.95667	2.8104	2.61477
1.95667	2.80249	2.61495
1.95667	2.80209	2.62566
1.95667	2.74366	2.64046
1.95667	2.77231	2.62021
1.95667	2.76326	2.62895
1.95667	2.77085	2.66058
1.95667	2.76967	2.63369
1.95667	2.78306	2.62293
1.95667	2.75337	2.63885
1.95667	2.78085	2.64037
1.95667	2.82764	2.59801
1.95667	2.79227	2.60375
1.95667	2.84238	2.60178
1.95667	2.81302	2.60354
1.95667	2.88192	2.61008
1.95667	2.88586	2.63888
1.95667	2.86538	2.64893
1.95667	2.85816	2.62243
1.95667	2.80361	2.5998
1.95667	2.87496	2.6245
1.95667	2.85169	2.63117
1.95667	2.81915	2.61158
1.95667	2.84325	2.60399
1.95667	2.82458	2.60041
1.95667	2.76566	2.5805
1.95667	2.76443	2.5767
1.95667	2.75656	2.57503
1.95667	2.79008	2.56492
1.95667	2.79592	2.56376
1.95667	2.8069	2.62486
1.95667	2.77272	2.62806
1.95667	2.79689	2.61767
1.95667	2.75709	2.63381
1.95667	2.71044	2.64937
1.95667	2.71026	2.62493
1.95667	2.78434	2.63034
1.95667	2.81255	2.58122
1.95667	2.75334	2.59964
1.95667	2.80646	2.61699
1.95667	2.86962	2.60754
1.95667	2.76568	2.57895
1.95667	2.809	2.59606
1.95667	2.86768	2.63542
1.95667	2.81333	2.6192
1.95667	2.80543	2.6165
1.95667	2.79964	2.63412
1.95667	2.7814	2.63054
1.95667	2.8316	2.60503
1.95667	2.81984	2.5742
1.95667	2.79077	2.58855
1.95667	2.82909	2.56397
1.95667	2.75582	2.58228
1.95667	2.75878	2.61925
1.95667	2.82936	2.62995
1.95667	2.83591	2.65552
1.95667	2.84627	2.62457
1.95667	2.86946	2.61561
1.95667	2.80186	2.60845
1.95667	2.76371	2.63485
1.95667	2.77474	2.59952
1.95667	2.80026	2.59547
1.95667	2.78904	2.63747
1.95667	2.86958	2.60346
1.95667	2.84614	2.57987
1.95667	2.80652	2.57705
1.95667	2.79067	2.5943
1.95667	2.76534	2.58567
1.95667	2.77538	2.54244
1.95667	2.78195	2.56541
1.95667	2.76474	2.57842
1.95667	2.75611	2.5857
1.95667	2.77036	2.60956
1.95667	2.80147	2.61729
1.95667	2.80054	2.59891
1.95667	2.82644	2.61379
1.95667	2.80173	2.60321
1.95667	2.79475	2.61157
1.95667	2.77446	2.61178
1.95667	2.74568	2.60952
1.95667	2.75362	2.60361
1.95667	2.7542	2.59672
1.95667	2.72339	2.61494
1.95667	2.75926	2.65086
1.95667	2.76149	2.61824
1.95667	2.73933	2.64005
1.95667	2.75424	2.61633
1.95667	2.77802	2.61814
1.95667	2.75629	2.61878
1.95667	2.7353	2.59423
1.95667	2.71043	2.62708
1.95667	2.72315	2.60909
1.95667	2.6928	2.65085
1.95667	2.70136	2.62652
1.95667	2.75378	2.6457
1.95667	2.7534	2.65336
1.95667	2.777	2.6156
1.95667	2.73375	2.62036
1.95667	2.78923	2.61043
1.95667	2.77702	2.60311
1.95667	2.74578	2.61489
1.95667	2.73077	2.62055
1.95667	2.72946	2.60716
1.95667	2.74486	2.62439
1.95667	2.74541	2.61135
1.95667	2.68158	2.60191
1.95667	2.78738	2.60406
1.95667	2.77397	2.63053
1.95667	2.75813	2.60193
1.95667	2.81613	2.59741
1.95667	2.76582	2.64054
1.95667	2.80743	2.63353
1.95667	2.81507	2.61635
1.95667	2.84263	2.6167
1.95667	2.86298	2.60017
1.95667	2.80174	2.60064
1.95667	2.82792	2.59544
1.95667	2.84208	2.62473
1.95667	2.83403	2.634
1.95667	2.82767	2.6331
1.95667	2.86532	2.59599
1.95667	2.85914	2.59063
1.95667	2.78687	2.58538
1.95667	2.8394	2.60391
1.95667	2.8022	2.63249
1.95667	2.81925	2.60464
1.95667	2.74574	2.61678
1.95667	2.77778	2.60245
1.95667	2.85255	2.6387
1.95667	2.81842	2.62844
1.95667	2.78453	2.62281
1.95667	2.7819	2.61605
1.95667	2.86345	2.6361
1.95667	2.80455	2.64064
1.95667	2.84871	2.63476
1.95667	2.73712	2.61944
1.95667	2.74648	2.63617
1.95667	2.83074	2.658
1.95667	2.82041	2.61871
1.95667	2.82353	2.6285
1.95667	2.84895	2.57527
1.95667	2.82801	2.58185
1.95667	2.88685	2.60458
1.95667	2.8857	2.59139
1.95667	2.86247	2.64508
1.95667	2.90605	2.61582
1.95667	2.90228	2.62759
1.95667	2.89167	2.60089
1.95667	2.78953	2.62588
1.95667	2.7572	2.60986
1.95667	2.80404	2.62332
1.95667	2.7634	2.57644
1.95667	2.77908	2.58821
1.95667	2.80604	2.64569
1.95667	2.85478	2.61038
1.95667	2.87867	2.58677
1.95667	2.80828	2.58546
1.95667	2.83611	2.60031
1.95667	2.80426	2.60655
1.95667	2.74128	2.62365
1.95667	2.74322	2.63189
1.95667	2.68863	2.60245
1.95667	2.69413	2.62097
1.95667	2.76638	2.61664
1.95667	2.7924	2.59184
1.95667	2.77599	2.62561
1.95667	2.81284	2.63397
1.95667	2.78406	2.60692
1.95667	2.76775	2.58469
1.95667	2.75751	2.61705
1.95667	2.77186	2.64099
1.95667	2.84822	2.633
1.95667	2.79894	2.61419
1.95667	2.89148	2.59755
1.95667	2.79772	2.5974
1.95667	2.78471	2.59301
1.95667	2.77705	2.61946
1.95667	2.77188	2.62765
1.95667	2.82232	2.62872
1.95667	2.87884	2.63119
1.95667	2.83573	2.62824
1.95667	2.82407	2.60995
1.95667	2.85956	2.63144
1.95667	2.78356	2.64227
1.95667	2.79643	2.64228
1.95667	2.79173	2.62322
1.95667	2.76429	2.6168
1.95667	2.76436	2.5938
1.95667	2.76605	2.59775
1.95667	2.79656	2.58959
1.95667	2.7733	2.61047
1.95667	2.75889	2.62151
1.95667	2.77527	2.6107
1.95667	2.78927	2.59772
1.95667	2.77139	2.57671
1.95667	2.78633	2.61046
1.95667	2.74899	2.58475
1.95667	2.80502	2.56546
1.95667	2.81308	2.54463
1.95667	2.79671	2.54229
1.95667	2.84925	2.56547
1.95667	2.80203	2.58429
1.95667	2.84465	2.53239
1.95667	2.85024	2.54371
1.95667	2.80407	2.56901
1.95667	2.82994	2.55683
1.95667	2.8315	2.55971
1.95667	2.86925	2.56191
1.95667	2.79055	2.57286
1.95667	2.82506	2.63933
1.95667	2.81862	2.60056
1.95667	2.82509	2.59971
1.95667	2.79592	2.57918
1.95667	2.80201	2.60728
1.95667	2.83013	2.56435
1.95667	2.81893	2.60575
1.95667	2.82969	2.58414
1.95667	2.81166	2.51412
1.95667	2.83441	2.59597
1.95667	2.85243	2.61603
1.95667	2.84298	2.58539
1.95667	2.79125	2.55419
1.95667	2.73192	2.56465
1.95667	2.7564	2.54618
1.95667	2.77752	2.54128
1.95667	2.78367	2.58683
1.95667	2.76321	2.59396
1.95667	2.78706	2.58266
1.95667	2.80408	2.61625
1.95667	2.83033	2.58733
1.95667	2.85463	2.56837
1.95667	2.83064	2.63597
1.95667	2.81955	2.6331
1.95667	2.81668	2.61631
1.95668	2.77924	2.63345
1.95667	2.71186	2.58386
1.95668	2.74653	2.62017
1.95667	2.77672	2.61366
1.95666	2.77821	2.60219
1.95672	2.80888	2.57639
1.95655	2.83903	2.57947
1.95711	2.81756	2.59406
1.9547	2.82489	2.54619
1.95464	2.8091	2.55393
1.95033	2.83235	2.57104
1.95925	2.87574	2.58734
1.95076	2.77849	2.57585
1.96103	2.77937	2.58546
1.96589	2.78594	2.59591
1.9573	2.78244	2.66014
1.96576	2.73384	2.63251
1.95391	2.70091	2.56173
1.94996	2.82268	2.57515
1.94109	2.81168	2.5786
1.9369	2.81648	2.59147
1.94869	2.82239	2.63303
1.95529	2.78751	2.6443
1.95077	2.83083	2.5979
1.95738	2.83383	2.60715
1.95416	2.82436	2.66142
1.97173	2.81034	2.63689
1.97416	2.79832	2.59647
1.98972	2.82892	2.62018
1.97605	2.78132	2.64328
1.97051	2.79768	2.64413
1.96832	2.7916	2.66473
1.97889	2.85132	2.61523
1.97766	2.84886	2.62915
1.97674	2.82297	2.59344
1.97738	2.86699	2.60271
1.97891	2.81437	2.6243
1.97051	2.78013	2.5709
1.97412	2.76474	2.58198
1.98032	2.75491	2.62594
1.98003	2.77994	2.63277
1.96936	2.76463	2.60764
1.97776	2.72455	2.62552
1.9869	2.82714	2.66081
1.98349	2.78994	2.61145
1.97949	2.78163	2.61888
1.97153	2.7924	2.62373
1.966	2.84763	2.6271
1.96408	2.86006	2.64702
1.96409	2.82113	2.63908
1.9702	2.87781	2.60484
1.9639	2.84521	2.54517
1.96552	2.85499	2.53972
1.975	2.85013	2.59812
1.97284	2.86717	2.60975
1.97268	2.81127	2.6426
1.97776	2.81599	2.65024
1.98051	2.73686	2.62801
1.964	2.76567	2.65717
1.97466	2.76443	2.65465
1.97101	2.78973	2.65988
1.96416	2.7731	2.66412
1.96739	2.79685	2.65878
1.9626	2.77761	2.63509
1.97613	2.82805	2.63589
1.9638	2.77659	2.62503
1.96725	2.76506	2.63089
1.96762	2.77441	2.67408
1.97638	2.75472	2.63046
1.96403	2.75413	2.58667
1.97247	2.71067	2.60682
1.97499	2.76547	2.63051
1.96518	2.80964	2.62253
1.96144	2.79173	2.63235
1.96782	2.8971	2.64157
1.96613	2.8281	2.59049
1.96719	2.82674	2.52649
1.97109	2.80217	2.54349
1.96805	2.71016	2.58347
1.97178	2.83077	2.58537
1.97084	2.78588	2.59951
1.96054	2.77386	2.57204
1.97978	2.78904	2.53908
1.97724	2.83594	2.56547
1.97701	2.81589	2.55013
1.9836	2.80328	2.56778
1.97498	2.80233	2.60672
1.97935	2.8228	2.6251
1.97364	2.84624	2.58216
1.96498	2.83623	2.5907
1.98187	2.80104	2.56529
1.98923	2.83374	2.6089
1.98745	2.79831	2.60418
1.98749	2.80367	2.58907
1.9879	2.79346	2.55022
1.97792	2.77753	2.50629
1.98075	2.72663	2.52967
1.97639	2.7731	2.55564
1.9847	2.84894	2.57332
1.98089	2.82957	2.56092
1.98962	2.78889	2.56164
1.98207	2.80613	2.55994
1.97762	2.8229	2.54728
1.96866	2.86147	2.5883
1.99144	2.83958	2.58271
1.97164	2.87888	2.57564
1.95484	2.82593	2.55727
1.97216	2.8568	2.58744
1.96389	2.88535	2.63214
1.98035	2.82881	2.64116
1.9813	2.80682	2.67721
1.99464	2.7203	2.67355
1.98325	2.78452	2.61136
1.98624	2.80328	2.59833
1.98417	2.81464	2.61889
2.01066	2.84888	2.61827
1.99608	2.86476	2.6173
1.98874	2.83693	2.59812
2.00621	2.85426	2.60304
1.99183	2.93751	2.59434
1.9979	2.85097	2.58966
2.00587	2.74415	2.55719
1.99895	2.75074	2.52606
2.01991	2.6961	2.57081
1.9977	2.71821	2.56859
2.01305	2.78296	2.56488
2.01254	2.78812	2.56017
1.99399	2.74186	2.62145
1.99991	2.82297	2.66053
1.99605	2.83553	2.65021
1.98306	2.8234	2.67668
1.99017	2.83129	2.64447
1.99655	2.84967	2.60821
1.99709	2.85839	2.6096
2.0005	2.79137	2.61188
1.9995	2.74477	2.58579
1.99232	2.7728	2.60065
2.00373	2.80699	2.62686
2.00067	2.85795	2.62284
1.99677	2.85861	2.64424
1.99005	2.83918	2.58806
1.99459	2.85648	2.63898
2.00329	2.87155	2.63316
1.9767	2.82468	2.62522
1.98933	2.8102	2.6744
1.99589	2.84516	2.68567
1.99105	2.77332	2.64431
1.98303	2.77403	2.68562
1.97549	2.81998	2.67294
1.98595	2.84114	2.58722
1.99463	2.82243	2.61364
2.01274	2.76801	2.63191
1.98644	2.87942	2.59989
1.97554	2.84302	2.5737
1.98218	2.79344	2.57987
1.99727	2.83579	2.58363
2.00427	2.79151	2.58836
2.01051	2.82639	2.60475
2.02045	2.77078	2.64462
2.0059	2.72183	2.60888
2.01385	2.71349	2.59209
2.02788	2.78872	2.65449
2.03457	2.77755	2.60425
2.00701	2.82339	2.61481
2.0214	2.8318	2.6142
2.04249	2.79735	2.60629
2.03453	2.82414	2.60716
2.04618	2.80992	2.61423
2.0283	2.7978	2.64851
2.01113	2.80036	2.65017
2.00047	2.83497	2.64209
1.99933	2.82907	2.62981
2.02565	2.87222	2.6118
1.99059	2.91995	2.61443
1.98724	2.87	2.59046
2.01438	2.76203	2.62764
2.01402	2.76927	2.65432
2.0323	2.82195	2.63831
2.04794	2.79421	2.61283
2.07078	2.81454	2.64924
2.06809	2.77407	2.67545
2.07346	2.78088	2.65703
2.0683	2.77352	2.65634
2.06113	2.74752	2.65449
2.04399	2.77862	2.62423
2.06459	2.80661	2.63928
2.03234	2.84999	2.62319
2.02031	2.86975	2.63524
2.0194	2.85699	2.68164
2.03392	2.78605	2.6795
2.04458	2.85929	2.64642
2.03031	2.82678	2.61427
2.02427	2.7948	2.62838
2.03931	2.82484	2.58652
2.02847	2.79548	2.65258
2.03435	2.78351	2.63853
2.05074	2.77849	2.61961
2.02868	2.81005	2.69975
2.01712	2.84906	2.6086
2.02656	2.85941	2.62179
2.01368	2.81071	2.6568
2.02881	2.76053	2.6522
2.04594	2.8253	2.62786
2.03644	2.82631	2.59941
2.03973	2.66811	2.58058
2.02647	2.76994	2.57716
2.03346	2.81302	2.62815
2.03259	2.76512	2.70563
2.06716	2.70943	2.55657
2.05628	2.74196	2.53854
2.04378	2.78469	2.59027
2.03611	2.67934	2.52161
2.04394	2.7007	2.68385
2.05451	2.73507	2.59453
2.05686	2.7203	2.6165
2.05281	2.68231	2.60885
2.05091	2.67683	2.58873
2.05392	2.77053	2.58956
2.06152	2.80617	2.59377
2.05668	2.75414	2.58461
2.03986	2.74126	2.58607
2.04469	2.77771	2.62726
2.04554	2.70486	2.62285
2.04196	2.73224	2.61674
2.03533	2.74818	2.63636
2.04231	2.82054	2.66154
2.0609	2.86056	2.70599
2.07567	2.7959	2.66854
2.04721	2.79436	2.66674
2.06809	2.77634	2.63997
2.06672	2.73274	2.64754
2.06459	2.73997	2.66436
2.06815	2.68459	2.60306
2.08252	2.7085	2.62878
2.07269	2.69424	2.61602
2.06124	2.68268	2.62825
2.06757	2.68219	2.52689
2.03903	2.73531	2.60847
2.03688	2.70594	2.62294
2.02401	2.73166	2.57357
2.04143	2.73463	2.66463
2.0253	2.77149	2.68368
2.03838	2.83091	2.61785
2.03456	2.72805	2.69135
2.05265	2.78392	2.64984
2.03863	2.72465	2.57747
2.05407	2.73831	2.56884
2.03887	2.72798	2.64212
2.0488	2.68673	2.57964
2.03902	2.68571	2.5697
2.05214	2.66422	2.65551
2.02901	2.588	2.61251
2.03841	2.65648	2.61667
2.02099	2.60953	2.57741
2.03679	2.7155	2.51999
2.05421	2.79336	2.52563
2.03357	2.74324	2.54212
2.05115	2.66827	2.56122
2.0396	2.73978	2.64372
2.04171	2.677	2.59382
2.068	2.74992	2.63535
2.05048	2.81778	2.61836
2.04511	2.88183	2.63341
2.05455	2.88555	2.58036
2.04021	2.7362	2.57676
2.04513	2.66312	2.55104
2.05151	2.73628	2.52249
2.03242	2.67715	2.51717
2.04131	2.6274	2.52318
2.03885	2.65962	2.54146
2.03272	2.71667	2.60649
2.05543	2.75479	2.59135
2.05013	2.80276	2.57595
2.05081	2.70441	2.64244
2.03446	2.78434	2.67864
2.02642	2.74969	2.65108
2.02563	2.732	2.53956
1.99489	2.73122	2.57184
2.00816	2.59729	2.6153
2.04468	2.61264	2.61205
2.02974	2.652	2.63913
2.03538	2.6086	2.6188
2.01941	2.76112	2.55984
2.00933	2.70287	2.50422
2.02528	2.7402	2.57197
2.0455	2.7233	2.57001
2.02404	2.7957	2.52182
2.01111	2.83613	2.60313
2.03885	2.77619	2.49212
2.06305	2.82029	2.53511
2.05328	2.79817	2.62801
2.05122	2.85318	2.60235
2.0591	2.76338	2.61545
2.06001	2.63824	2.62517
2.02797	2.74195	2.60563
2.04487	2.70417	2.58084
2.01995	2.75952	2.65298
2.02678	2.8914	2.59925
2.03887	2.80827	2.57027
2.03463	2.88988	2.5663
2.03529	2.85344	2.57184
2.04774	2.66668	2.58474
2.04158	2.68617	2.64299
2.05146	2.63001	2.65435
2.03214	2.68791	2.54202
2.04463	2.68941	2.65987
2.07552	2.80404	2.6079
2.06392	2.75982	2.58614
2.02906	2.72079	2.60995
2.05034	2.7374	2.55991
2.02378	2.67838	2.55412
2.02517	2.77163	2.49119
2.03847	2.74644	2.57765
2.0319	2.669	2.66595
2.03843	2.80199	2.66916
2.04322	2.83056	2.65754
2.03687	2.77943	2.63437
2.04635	2.73612	2.53309
2.04189	2.72694	2.55098
2.04197	2.74525	2.54992
2.04356	2.76418	2.55065
2.06862	2.84421	2.53243
2.04833	2.75567	2.55136
2.04461	2.66637	2.62333
2.03573	2.86115	2.63157
2.06238	2.86665	2.52725
2.05877	2.82675	2.52751
2.0241	2.8014	2.6006
2.02454	2.83421	2.53745
2.03617	2.86166	2.50843
2.06518	2.78036	2.60768
2.05149	2.83415	2.569
2.05926	2.71572	2.57894
2.04766	2.85048	2.56873
2.04278	2.7194	2.58237
2.04266	2.64897	2.59608
2.01737	2.70635	2.5932
2.03509	2.64651	2.60911
2.02696	2.61776	2.59125
2.02189	2.75552	2.66731
2.02389	2.8696	2.63376
2.03203	2.6642	2.67801
2.05164	2.7632	2.57287
2.04829	2.88338	2.61208
2.01823	2.77829	2.60734
2.02993	2.7277	2.57885
2.04268	2.71678	2.57514
2.04399	2.77314	2.53515
2.04309	2.75983	2.5365
2.05107	2.73305	2.52521
2.04504	2.60932	2.56006
2.05701	2.75263	2.55857
2.05127	2.77049	2.55339
2.0249	2.65276	2.59679
2.04267	2.69872	2.66187
2.02394	2.726	2.58355
2.05834	2.65673	2.60353
2.04585	2.76208	2.64714
2.04313	2.7963	2.65237
2.06598	2.72242	2.64464
2.05539	2.70246	2.55848
2.01191	2.7615	2.54228
2.01735	2.80432	2.50839
2.02802	2.71411	2.61561
2.04802	2.66733	2.64109
2.04483	2.67611	2.63927
2.05215	2.6266	2.59557
2.02833	2.69467	2.59114
2.03038	2.72031	2.60182
2.03808	2.69621	2.56994
2.02177	2.7468	2.57507
2.06108	2.75204	2.61496
2.06353	2.73426	2.59417
2.04363	2.80804	2.64679
2.06238	2.77077	2.58303
2.06111	2.74981	2.53514
2.05781	2.78892	2.58979
2.05531	2.78521	2.59357
2.04002	2.7778	2.55546
2.02836	2.684	2.50743
2.01712	2.73214	2.54617
2.02324	2.75891	2.55623
2.02059	2.82545	2.54982
2.04373	2.99815	2.53932
2.07597	2.76273	2.60579
2.08138	2.82569	2.56952
2.07731	2.83161	2.56785
2.08284	2.80191	2.56912
2.05267	2.70709	2.54775
2.06031	2.69993	2.53144
2.04614	2.71203	2.51424
2.04897	2.70263	2.51041
2.07576	2.77117	2.51495
2.0459	2.80282	2.55275
2.06232	2.73385	2.6245
2.07577	2.76975	2.53037
2.04877	2.76741	2.50617
2.06119	2.72734	2.51815
2.04707	2.70914	2.45975
2.06018	2.7827	2.5223
2.07734	2.82942	2.46144
2.09094	2.7995	2.44539
2.06983	2.83833	2.49311
2.05883	2.78798	2.48813
2.06418	2.702	2.46118
2.06456	2.70351	2.48566
2.10099	2.66189	2.49449
2.08743	2.70579	2.51353
2.08296	2.70752	2.56566
2.08293	2.72381	2.56584
2.09133	2.76164	2.50509
2.10093	2.8054	2.59841
2.09051	2.78691	2.59359
2.07241	2.88127	2.49155
2.07973	2.8202	2.51876
2.05375	2.71492	2.50223
2.06005	2.64099	2.54445
2.05508	2.65499	2.60165
2.07702	2.58137	2.58298
2.06617	2.69962	2.59187
2.0617	2.64864	2.48712
2.08653	2.69511	2.52697
2.10423	2.72408	2.58862
2.10918	2.70205	2.64869
2.12321	2.75718	2.58067
2.08883	2.81917	2.51729
2.09708	2.79286	2.5075
2.10737	2.74129	2.52735
2.11763	2.79906	2.5571
2.1022	2.78813	2.55527
2.10405	2.71726	2.51742
2.12059	2.72549	2.52347
2.1002	2.67208	2.53211
2.13662	2.69747	2.52354
2.12239	2.62637	2.47262
2.09671	2.71814	2.54149
2.09096	2.75243	2.5527
2.09345	2.76511	2.62282
2.12382	2.73654	2.56504
2.09547	2.77933	2.52763
2.11116	2.79124	2.60985
2.10431	2.73587	2.59088
2.08304	2.7372	2.54172
2.0791	2.74828	2.52188
2.08412	2.73728	2.61819
2.09037	2.67149	2.5403
2.10755	2.61811	2.47371
2.10364	2.67172	2.45885
2.05603	2.60329	2.51828
2.06063	2.70693	2.51416
2.08729	2.64352	2.56137
2.10164	2.70899	2.57988
2.04269	2.81462	2.52573
2.06313	2.72883	2.579
2.07975	2.75175	2.61753
2.11488	2.83043	2.58848
2.13318	2.82476	2.53436
2.14031	2.86706	2.54418
2.12737	2.86812	2.57281
2.11075	2.89992	2.57437
2.08312	2.80645	2.50764
2.09273	2.83569	2.46565
2.09034	2.76219	2.59185
2.1224	2.7717	2.57335
2.11938	2.77303	2.52218
2.12714	2.69025	2.51723
2.1427	2.71905	2.54201
2.13144	2.76818	2.56103
2.18241	2.77841	2.56387
2.21865	2.79023	2.57581
2.2038	2.86215	2.52675
2.17139	2.91729	2.52192
2.14859	2.81993	2.58741
2.18204	2.76616	2.45602
2.11865	2.77587	2.53333
2.14006	2.62688	2.49388
2.16687	2.53956	2.49438
2.16393	2.64251	2.60896
2.12999	2.67975	2.57381
2.19556	2.71701	2.60492
2.1974	2.78393	2.56807
2.15976	2.82203	2.62254
2.1478	2.72605	2.57962
2.12167	2.72965	2.57057
2.09518	2.73275	2.52668
2.12418	2.71998	2.59526
2.11418	2.74864	2.58992
2.09776	2.69367	2.59184
2.09037	2.69631	2.59229
2.10702	2.71217	2.51686
2.13498	2.76476	2.53603
2.14601	2.73381	2.58271
2.10592	2.72814	2.5271
2.11524	2.73444	2.53796
2.12687	2.66182	2.56212
2.11281	2.68476	2.54525
2.13857	2.78683	2.49824
2.08445	2.7343	2.54252
2.08431	2.70333	2.62204
2.10775	2.76609	2.61832
2.13441	2.74675	2.58723
2.1413	2.60008	2.57678
2.13611	2.57694	2.55004
2.16512	2.78839	2.50439
2.16932	2.8407	2.6062
2.20572	2.8937	2.61399
2.20085	2.81768	2.6287
2.16248	2.65402	2.56037
2.1667	2.68052	2.51164
2.11551	2.73294	2.55833
2.09273	2.64361	2.45635
2.11605	2.61811	2.51756
2.10677	2.81623	2.53187
2.11576	2.83999	2.52069
2.15031	2.78438	2.5402
2.13696	2.78891	2.52172
2.11805	2.82782	2.60459
2.14759	2.76753	2.57409
2.20007	2.73012	2.52263
2.16221	2.6465	2.55698
2.1047	2.6387	2.51939
2.13294	2.73742	2.54756
2.13969	2.66872	2.55881
2.13205	2.65113	2.61309
2.11383	2.66791	2.62596
2.1557	2.64201	2.52711
2.15609	2.62475	2.53593
2.1488	2.60967	2.5671
2.12268	2.61287	2.61406
2.09082	2.60196	2.67927
2.10548	2.59772	2.61972
2.10032	2.62368	2.56757
2.10306	2.65662	2.60621
2.1002	2.63299	2.57797
2.12086	2.58545	2.52285
2.13397	2.66682	2.52536
2.1476	2.64733	2.52582
2.10088	2.7722	2.60515
2.11715	2.74625	2.66042
2.0933	2.70437	2.56539
2.10223	2.80615	2.60275
2.10147	2.78878	2.55257
2.12079	2.67852	2.51573
2.12767	2.66906	2.46062
2.07631	2.72699	2.50003
2.11035	2.74331	2.56813
2.13162	2.71389	2.58345
2.14733	2.71578	2.57651
2.15962	2.73564	2.5524
2.14622	2.79173	2.54558
2.14259	2.75035	2.50231
2.12117	2.72533	2.51009
2.13589	2.72174	2.63145
2.12988	2.73036	2.63435
2.11872	2.68176	2.59473
2.10112	2.72887	2.56355
2.07963	2.62786	2.62202
2.14307	2.68187	2.60873
2.15684	2.63004	2.55899
2.17027	2.62532	2.58954
2.16103	2.59817	2.61421
2.1508	2.58094	2.66672
2.14933	2.62487	2.59085
2.15717	2.64917	2.6207
2.1499	2.77296	2.60675
2.1447	2.76514	2.58756
2.14101	2.82765	2.5697
2.15724	2.79203	2.57467
2.13612	2.86262	2.50775
2.15674	2.85468	2.57855
2.13151	2.79891	2.61331
2.0804	2.79443	2.62432
2.11671	2.81256	2.58701
2.12157	2.75315	2.57922
2.11799	2.74145	2.59724
2.09964	2.76913	2.53493
2.14556	2.72144	2.55461
2.13958	2.7304	2.60699
2.12724	2.61245	2.54416
2.13639	2.73999	2.57
2.15355	2.73563	2.67726
2.17272	2.77263	2.6613
2.12143	2.87446	2.65143
2.10723	2.71808	2.60053
2.10416	2.70922	2.48745
2.15755	2.7011	2.57139
2.1536	2.75412	2.58034
2.14088	2.63829	2.63435
2.12455	2.72079	2.59703
2.10242	2.77961	2.54547
2.07652	2.68152	2.51759
2.13894	2.74443	2.52819
2.08535	2.70896	2.59014
2.10588	2.7049	2.58673
2.12677	2.69717	2.59903
2.12403	2.72747	2.60578
2.09027	2.64653	2.57259
2.10598	2.63093	2.48559
2.11959	2.64037	2.54324
2.17325	2.7394	2.60666
2.17957	2.85094	2.63216
2.09135	2.85049	2.56921
2.18408	2.76991	2.555
2.1872	2.83728	2.55914
2.17935	2.83155	2.56654
2.16978	2.87244	2.49103
2.16323	2.73199	2.5698
2.17142	2.77343	2.67671
2.16816	2.78183	2.64492
2.11735	2.74905	2.71107
2.12537	2.78081	2.63018
2.11864	2.74598	2.58574
2.11865	2.6592	2.54608
2.11581	2.61976	2.62042
2.07226	2.59018	2.63656
2.12196	2.61634	2.58826
2.13277	2.65865	2.63438
2.16816	2.67768	2.59575
2.09885	2.68715	2.56992
2.06976	2.7688	2.58098
2.10647	2.66415	2.55092
2.07987	2.61861	2.60281
2.0873	2.63167	2.63656
2.13225	2.74528	2.66125
2.11407	2.74434	2.70301
2.1407	2.79384	2.58456
2.12174	2.81308	2.58143
2.14039	2.70407	2.68232
2.13629	2.77915	2.6701
2.09452	2.69844	2.66746
2.12328	2.7181	2.65385
2.13982	2.71545	2.5983
2.13542	2.8483	2.62073
2.12367	2.79047	2.56739
2.14087	2.75375	2.54955
2.12566	2.82956	2.68102
2.09534	2.69884	2.60849
2.08609	2.67272	2.61494
2.04682	2.69265	2.59979
2.05559	2.69236	2.56817
2.04955	2.68802	2.61069
2.10672	2.66642	2.57431
2.14368	2.84162	2.5115
2.17109	2.64166	2.49167
2.11338	2.705	2.42785
2.1398	2.69615	2.49841
2.17076	2.5647	2.5172
2.13073	2.62374	2.5521
2.11505	2.68228	2.55856
2.06405	2.77329	2.60104
2.08317	2.65222	2.65237
2.09078	2.7319	2.5596
2.12547	2.74938	2.51658
2.09862	2.71363	2.48192
2.09441	2.82189	2.54761
2.14853	2.71758	2.64884
2.19365	2.713	2.66872
2.19236	2.74478	2.59691
2.16826	2.71032	2.64488
2.15974	2.64861	2.64113
2.14308	2.6053	2.67567
2.11406	2.72205	2.6785
2.06755	2.65828	2.64704
2.03005	2.71826	2.62657
2.02791	2.72161	2.56058
2.10303	2.76623	2.64069
2.14665	2.7394	2.69078
2.172	2.73888	2.66122
2.16731	2.82347	2.55632
2.19645	2.79187	2.54821
2.151	2.84933	2.5171
2.13749	2.75632	2.56398
2.1406	2.67501	2.51742
2.12186	2.71955	2.54794
2.07828	2.75176	2.5294
2.03647	2.84001	2.51691
2.05212	2.81608	2.5689
2.06448	2.85337	2.48282
2.10156	2.85423	2.48879
2.08861	2.80388	2.52874
2.05691	2.81081	2.58287
2.10771	2.76086	2.5504
2.08892	2.76692	2.59867
2.12898	2.71814	2.55631
2.11929	2.71912	2.53344
2.11518	2.68715	2.61323
2.09894	2.72597	2.61466
2.0969	2.6339	2.66295
2.1036	2.7285	2.59037
2.13133	2.75595	2.61724
2.06675	2.66408	2.68791
2.071	2.72685	2.60014
2.11138	2.88078	2.55576
2.091	2.88909	2.51576
2.10362	2.74995	2.57673
2.12146	2.70408	2.65131
2.11091	2.68775	2.63462
2.08883	2.66059	2.56135
2.12778	2.70461	2.55193
2.118	2.62977	2.58205
2.07413	2.60793	2.57657
2.10955	2.67717	2.62479
2.13155	2.77397	2.64723
2.13677	2.79722	2.56424
2.16132	2.78687	2.52583
2.12999	2.693	2.5857
2.10577	2.70318	2.64041
2.06927	2.69219	2.54855
2.10728	2.5764	2.52551
2.10024	2.69317	2.55828
2.09514	2.67833	2.52923
2.12179	2.7794	2.52534
2.14506	2.77339	2.52979
2.12279	2.72391	2.46998
2.09122	2.69872	2.441
2.07959	2.67844	2.53977
2.09955	2.72487	2.50543
2.12126	2.68013	2.44668
2.10709	2.75003	2.55804
2.04964	2.79512	2.53454
2.08483	2.8435	2.52976
2.08032	2.82715	2.58316
2.09805	2.8328	2.58571
2.114	2.77818	2.55939
2.11225	2.79145	2.49596
2.10687	2.77088	2.48509
2.13269	2.73817	2.52995
2.1151	2.7167	2.52878
2.11525	2.75983	2.56746
2.12343	2.83761	2.58963
2.09321	2.87384	2.53293
2.12838	2.88098	2.55664
2.08798	2.92091	2.59429
2.08254	2.78232	2.58594
2.10854	2.67193	2.63452
2.11786	2.77492	2.62653
2.13475	2.67024	2.51972
2.16017	2.69728	2.54388
2.13892	2.71124	2.59569
2.17803	2.72704	2.62667
2.17215	2.62602	2.57625
2.14896	2.63131	2.55892
2.1398	2.634	2.54429
2.12062	2.68048	2.47585
2.11122	2.65513	2.53004
2.12877	2.69804	2.50688
2.10789	2.69886	2.5792
2.14708	2.84418	2.57842
2.12283	2.8711	2.56168
2.12152	2.75761	2.5543
2.17883	2.74662	2.58634
2.1716	2.73662	2.54825
2.18836	2.79563	2.50311
2.19104	2.80645	2.53016
2.18347	2.80865	2.60019
2.1325	2.89436	2.53861
2.13896	2.83887	2.55383
2.0941	2.83018	2.6042
2.08546	2.7328	2.60344
2.02047	2.66546	2.50721
2.06749	2.85432	2.44529
2.12338	2.87194	2.53837
2.11624	2.93938	2.52648
2.12509	3.01583	2.54425
2.13309	2.90081	2.57631
2.14076	2.88784	2.58525
2.15973	2.89791	2.5151
2.17172	2.78627	2.54621
2.19147	2.74777	2.59823
2.17551	2.73875	2.62497
2.1255	2.79115	2.66121
2.16057	2.68122	2.64031
2.21001	2.82131	2.63153
2.18532	2.87409	2.60178
2.18615	2.74417	2.54972
2.1776	2.82674	2.60219
2.18633	2.80467	2.67417
2.19643	2.8008	2.65113
2.19232	2.69195	2.57847
2.21001	2.5435	2.66192
2.2139	2.7643	2.65519
2.20034	2.78322	2.54756
2.17569	2.88032	2.59589
2.18191	2.79726	2.63234
2.17681	2.79504	2.62441
2.16027	2.78289	2.46628
2.20813	2.71722	2.51494
2.22843	2.63364	2.58329
2.17834	2.68425	2.48914
2.18936	2.70573	2.53022
2.18092	2.74203	2.47581
2.20482	2.7382	2.42466
2.19178	2.65967	2.50741
2.18601	2.67825	2.57142
2.22104	2.72258	2.51182
2.18526	2.79319	2.49002
2.21102	2.75687	2.54076
2.19222	2.70776	2.50978
2.15579	2.79186	2.51194
2.1868	2.75434	2.58582
2.16725	2.68906	2.50169
2.16789	2.60746	2.59728
2.15652	2.69159	2.66117
2.20329	2.62278	2.50373
2.18287	2.74015	2.52604
2.19504	2.79062	2.56019
2.17132	2.7085	2.56508
2.1197	2.78545	2.66929
2.13175	2.77894	2.66176
2.20194	2.73105	2.68998
2.19405	2.70999	2.73349
2.18604	2.68785	2.6453
2.15647	2.70687	2.71423
2.22345	2.71162	2.59262
2.2626	2.79763	2.59837
2.20509	2.8119	2.67552
2.23599	2.7572	2.59179
2.22377	2.72767	2.51236
2.20215	2.6977	2.57067
2.20487	2.64468	2.51715
2.23647	2.71935	2.56457
2.23602	2.75261	2.64115
2.23206	2.75121	2.54224
2.25942	2.78278	2.56672
2.24444	2.84992	2.61123
2.25441	2.93281	2.65836
2.21783	2.82569	2.57606
2.20876	2.82626	2.57242
2.23062	2.71833	2.66288
2.27339	2.67766	2.65027
2.19159	2.67965	2.6305
2.23968	2.76643	2.51955
2.22213	2.7113	2.50343
2.25952	2.6566	2.54669
2.26575	2.68609	2.59814
2.22526	2.76569	2.53728
2.2647	2.78836	2.48746
2.25996	2.80499	2.50934
2.2526	2.78229	2.63179
2.30302	2.74236	2.62857
2.27201	2.78919	2.53512
2.31162	2.8941	2.51116
2.24021	2.8242	2.50394
2.2377	2.8729	2.46159
2.26095	2.83701	2.44835
2.2781	2.84662	2.42256
2.23252	2.74503	2.37492
2.26887	2.82487	2.45173
2.26858	2.66715	2.52931
2.22823	2.61281	2.48868
2.23847	2.69414	2.45283
2.24172	2.82637	2.50925
2.28205	2.77109	2.483
2.28287	2.79258	2.5137
2.24188	2.85617	2.55961
2.24584	2.82963	2.4764
2.28507	2.72955	2.53305
2.23172	2.7999	2.50516
2.22428	2.90588	2.41692
2.21352	2.80829	2.49955
2.19667	2.87607	2.51161
2.20274	2.84281	2.49411
2.19203	2.79397	2.57217
2.2049	2.7757	2.62504
2.21511	2.91078	2.55501
2.2175	2.92943	2.61177
2.17928	2.80998	2.68701
2.23387	2.76751	2.58093
2.23135	2.81208	2.5898
2.27375	2.80081	2.54402
2.23323	2.58239	2.50772
2.21966	2.5854	2.502
2.23023	2.6057	2.52297
2.28874	2.61357	2.5795
2.34022	2.78789	2.61799
2.29638	2.60716	2.66673
2.28076	2.6294	2.61939
2.23352	2.80507	2.59678
2.27743	2.81756	2.60801
2.28877	2.80278	2.55092
2.30143	2.77836	2.49992
2.27402	2.65565	2.47033
2.29679	2.66256	2.45171
2.23383	2.7783	2.52096
2.21654	2.78122	2.54034
2.23687	2.7757	2.5063
2.22731	2.78023	2.50296
2.27677	2.815	2.47054
2.27758	2.95333	2.4848
2.29927	2.88549	2.51585
2.29284	2.84379	2.48132
2.31191	2.77876	2.53212
2.29609	2.72286	2.52879
2.18703	2.84586	2.50653
2.24099	2.75485	2.4719
2.261	2.74838	2.47758
2.26301	2.70345	2.51366
2.25702	2.72024	2.43404
2.16874	2.78428	2.56161
2.24175	2.80111	2.52425
2.26787	2.77475	2.56909
2.32044	2.82569	2.51563
2.33375	2.88521	2.50428
2.3575	2.82655	2.53485
2.36044	2.77256	2.46158
2.29914	2.69068	2.51173
2.32728	2.6438	2.64558
2.28529	2.75581	2.53868
2.29465	2.76655	2.58964
2.25869	2.56342	2.55969
2.24853	2.68736	2.48582
2.23404	2.85847	2.6231
2.24327	2.74641	2.54269
2.26341	2.69313	2.52994
2.35731	2.69116	2.45673
2.3449	2.86591	2.53246
2.35953	2.9271	2.50444
2.34205	2.85213	2.50019
2.29162	2.93722	2.56197
2.30467	2.86945	2.44762
2.26785	2.91035	2.46663
2.27523	2.87215	2.45138
2.27478	2.82647	2.50092
2.20186	2.67026	2.51967
2.26186	2.64149	2.53042
2.26919	2.75005	2.60976
2.29312	2.73019	2.54507
2.31927	2.69952	2.57874
2.28005	2.67636	2.50283
2.264	2.69846	2.49795
2.30252	2.7526	2.58701
2.24948	2.77085	2.68165
2.29657	2.61853	2.68084
2.28783	2.69479	2.70511
2.34177	2.90292	2.62693
2.33809	2.84708	2.49201
2.30602	2.82224	2.61301
2.27037	2.85805	2.53601
2.30021	2.83848	2.50508
2.32444	2.65466	2.4429
2.33362	2.66527	2.45863
2.30152	2.79999	2.4767
2.25676	2.84362	2.64616
2.25971	2.72148	2.57365
2.29415	2.77551	2.54631
2.25032	2.86513	2.59847
2.23179	2.89047	2.55652
2.19976	2.84844	2.6144
2.25032	2.70124	2.51568
2.24481	2.81647	2.55589
2.22421	2.70302	2.40178
2.29358	2.72267	2.42819
2.29928	2.72656	2.6008
2.30608	2.81157	2.56317
2.28305	2.9483	2.6789
2.25339	2.87142	2.62971
2.22924	2.78928	2.58126
2.28925	2.74221	2.65065
2.30127	2.74818	2.68019
2.33757	2.84938	2.67876
2.33036	2.8349	2.63152
2.32067	2.76372	2.50294
2.32075	2.83151	2.52135
2.38163	2.81627	2.41253
2.38696	2.96653	2.42339
2.35292	2.84867	2.49041
2.32438	2.92068	2.51929
2.28034	2.79608	2.72755
2.29632	2.71796	2.70484
2.29815	2.83553	2.5559
2.31881	2.67221	2.58106
2.26165	2.77989	2.61351
2.2633	2.7661	2.60468
2.27753	2.78912	2.52307
2.20153	2.78647	2.50707
2.28836	2.73792	2.53203
2.28826	2.80207	2.5048
2.2492	2.90603	2.68286
2.2104	2.88307	2.56646
2.18577	2.88993	2.58639
2.18242	2.8825	2.57926
2.21495	2.93114	2.56457
2.18658	3.03951	2.63312
2.24369	2.85013	2.59736
2.28187	2.89508	2.60695
2.27358	3.01286	2.50368
2.32753	2.84857	2.58585
2.3727	2.99224	2.63045
2.36881	2.95653	2.50124
2.3891	3.00241	2.5484
2.37089	2.97288	2.53635
2.34059	2.99967	2.615
2.36459	2.95243	2.6534
2.2917	2.82979	2.57696
2.32922	2.69048	2.55501
2.37227	2.83432	2.57229
2.39527	2.80945	2.69371
2.36191	2.82177	2.62158
2.33215	2.84365	2.5392
2.32428	2.85956	2.62243
2.39605	2.96457	2.66394
2.36687	2.77771	2.59393
2.33814	2.61464	2.5493
2.35541	2.72628	2.55865
2.35213	2.80994	2.56721
2.34146	3.0009	2.50814
2.40838	2.92309	2.49771
2.40041	2.88496	2.54526
2.35348	3.08492	2.47358
2.30342	3.01869	2.53217
2.35437	2.70555	2.54539
2.39988	2.85615	2.52622
2.39672	2.95425	2.55014
2.38485	2.94679	2.48276
2.36057	2.78932	2.53994
2.34473	2.85525	2.60587
2.27828	2.80428	2.53047
2.29541	2.64383	2.4928
2.32308	2.68411	2.51286
2.32601	2.54409	2.51911
2.33604	2.56257	2.58627
2.32201	2.71298	2.54889
2.34534	2.8707	2.54714
2.31914	2.77216	2.51525
2.2632	2.74979	2.50802
2.26903	2.86055	2.50959
2.23883	2.92234	2.61993
2.25455	3.06407	2.67957
2.23826	2.94151	2.7313
2.28828	2.95655	2.73531
2.30572	2.99475	2.60583
2.34463	2.95882	2.68595
2.2947	3.00111	2.56153
2.26412	2.87199	2.53212
2.29864	2.82334	2.52223
2.3566	2.63985	2.45202
2.38556	2.77266	2.46505
2.34212	2.96072	2.44046
2.31809	2.89085	2.48929
2.35045	2.68703	2.50461
2.40178	2.84917	2.49452
2.36146	2.78366	2.51943
2.38373	2.87642	2.43119
2.44661	2.64466	2.48648
2.40415	2.70113	2.5708
2.30705	2.72407	2.57386
2.34874	2.52631	2.63592
2.36109	2.65407	2.56928
2.29674	2.69209	2.54797
2.30411	2.87714	2.5959
2.35075	2.99664	2.48475
2.28251	2.74431	2.58673
2.29903	2.82666	2.62673
2.36305	2.71959	2.62146
2.31051	2.7489	2.60042
2.27468	2.79335	2.56484
2.31156	2.79407	2.50084
2.35703	2.87785	2.3999
2.33758	2.9608	2.47764
2.35832	2.91963	2.54094
2.37177	2.96694	2.51857
2.35609	2.85724	2.50266
2.38428	2.79946	2.57412
2.35251	2.80327	2.53512
2.39278	2.89819	2.62982
2.37632	2.73399	2.62231
2.41673	2.74604	2.61718
2.38354	2.81004	2.59201
2.33513	2.89953	2.70272
2.31751	2.83084	2.52197
2.3794	2.89364	2.50108
2.44065	2.69755	2.4955
2.31254	2.63506	2.53644
2.31716	2.91053	2.52957
2.3371	2.82503	2.42017
2.32572	2.87224	2.49403
2.30518	2.68966	2.44045
2.32549	2.69052	2.47312
2.306	2.84508	2.45523
2.28639	2.81591	2.53871
2.27246	2.74085	2.48494
2.31465	2.70942	2.43593
2.30553	2.67436	2.49769
2.37355	2.70855	2.6856
2.38343	2.83614	2.53077
2.33881	2.91625	2.60791
2.35759	2.83422	2.67005
2.39532	2.93045	2.78923
2.41052	2.76118	2.64723
2.39788	2.81144	2.62391
2.42198	2.86702	2.59283
2.42573	2.7216	2.58198
2.43871	2.81335	2.5433
2.44061	2.78429	2.66185
2.35895	2.97214	2.61085
2.34956	3.09401	2.53388
2.32692	2.97549	2.511
2.34045	2.83116	2.68839
2.34334	2.76091	2.58646
2.3606	2.66569	2.55327
2.48121	2.86358	2.45698
2.47135	2.85884	2.4875
2.42533	2.80095	2.50611
2.37749	2.91788	2.66334
2.36222	2.85198	2.54537
2.34945	2.75931	2.66818
2.34688	2.64585	2.73197
2.34924	2.83491	2.52041
2.37504	2.70206	2.56032
2.39238	2.72124	2.47064
2.38088	2.8204	2.61894
2.40025	2.8117	2.59533
2.42684	2.6768	2.64038
2.39797	2.56308	2.56152
2.43749	2.60784	2.58074
2.3688	2.50723	2.51546
2.33591	2.61487	2.53856
2.36259	2.64264	2.59208
2.4611	2.8084	2.63999
2.36172	2.88836	2.55546
2.42123	2.81441	2.43564
2.35573	2.86729	2.52263
2.38164	2.76434	2.62086
2.42299	2.6166	2.48781
2.41361	2.47816	2.55009
2.4117	2.70657	2.3927
2.38643	2.72656	2.53978
2.39502	2.56463	2.51102
2.36071	2.71846	2.49316
2.3381	2.87556	2.61961
2.34608	2.83856	2.68283
2.31864	2.64768	2.58673
2.32294	2.67787	2.49929
2.38033	2.8277	2.60643
2.35821	3.06049	2.6009
2.38757	2.91764	2.55607
2.35984	2.78739	2.51289
2.31483	2.84159	2.51404
2.38994	2.8162	2.5357
2.43306	2.58001	2.57096
2.48181	2.65552	2.55406
2.39164	2.686	2.72707
2.37445	2.7307	2.76093
2.37323	2.58735	2.61901
2.44335	2.6708	2.46508
2.33272	2.79	2.55926
2.32897	2.57806	2.62787
2.38945	2.73455	2.59137
2.39664	2.62576	2.59298
2.35317	2.52718	2.5761
2.32905	2.78349	2.69372
2.33682	2.81572	2.72975
2.46091	2.67654	2.82372
2.41704	2.88556	2.72858
2.43172	2.76004	2.70545
2.42904	2.75022	2.73776
2.35528	2.69708	2.73317
2.37296	2.73428	2.63249
2.35203	2.76004	2.60295
2.30663	2.68396	2.65309
2.30799	2.69512	2.56182
2.31753	2.78165	2.6389
2.3853	2.60713	2.64765
2.31935	2.90471	2.58874
2.36341	2.6803	2.6723
2.38775	2.61344	2.67809
2.31316	2.84727	2.67118
2.39445	2.79838	2.67119
2.46237	2.80805	2.48486
2.48013	2.79499	2.68176
2.44964	2.9514	2.53989
2.42646	2.8213	2.59647
2.39126	2.77733	2.51318
2.36078	2.72977	2.58704
2.4831	2.74669	2.55594
2.45541	2.80594	2.62427
2.49585	2.7649	2.55534
2.52632	2.6358	2.57319
2.48304	2.81769	2.65191
2.45299	2.83585	2.59214
2.44912	2.80249	2.69938
2.46633	2.92648	2.67321
2.45697	2.86965	2.72642
2.40577	2.83785	2.65909
2.39319	2.69179	2.71505
2.44047	2.76648	2.67451
2.5493	2.69724	2.5435
2.4601	2.70825	2.57035
2.46224	2.7457	2.54382
2.43279	2.56294	2.53038
2.39249	2.45535	2.60577
2.40156	2.63796	2.62796
2.41688	2.54257	2.64187
2.48863	2.7605	2.65963
2.40939	2.5188	2.72058
2.46587	2.71904	2.6244
2.41592	2.7894	2.6174
2.42614	2.80084	2.69589
2.475	2.75871	2.72567
2.51536	2.6781	2.51289
2.51458	2.97779	2.60521
2.50472	2.82985	2.53647
2.52989	2.7537	2.55803
2.5439	3.0362	2.40419
2.54391	2.93425	2.49869
2.46157	2.81791	2.55049
2.52562	2.8687	2.73259
2.47552	2.77579	2.72701
2.51282	2.66295	2.58939
2.49835	2.68431	2.58601
2.50429	2.69445	2.60425
2.50899	2.80945	2.64142
2.59125	2.83357	2.67325
2.52097	2.77496	2.62924
2.52566	2.65132	2.64656
2.47918	2.64719	2.51822
2.45954	2.83456	2.56573
2.50118	2.80728	2.592
2.50876	2.71835	2.67299
2.53672	2.80135	2.49471
2.5582	2.90779	2.63196
2.50014	2.78765	2.53776
2.45006	2.89785	2.52049
2.50981	2.87471	2.44327
2.50883	2.67816	2.42163
2.50966	2.8375	2.44295
2.54261	2.85294	2.57013
2.56913	2.83538	2.54934
2.60585	2.89465	2.66227
2.63645	2.82804	2.7128
2.50911	2.83146	2.69565
2.496	2.93036	2.58288
2.55591	2.8567	2.63432
2.46222	2.8294	2.61777
2.44751	2.70955	2.4422
2.48312	2.49617	2.41836
2.437	2.46385	2.54904
2.47452	2.67625	2.64757
2.56411	2.65545	2.42623
2.55601	2.75215	2.52957
2.52082	2.80332	2.54169
2.4314	2.68929	2.54457
2.42512	2.63009	2.5928
2.41351	2.9004	2.48145
2.41142	2.62568	2.48743
2.42309	2.67955	2.68795
2.42981	2.71392	2.66584
2.42247	2.67966	2.54613
2.40145	2.65125	2.57145
2.476	2.81203	2.67716
2.48182	2.87784	2.56745
2.43955	2.75575	2.63825
2.50717	2.6739	2.58598
2.48107	2.80786	2.50143
2.4338	3.04508	2.58761
2.50815	2.85709	2.4361
2.50722	2.80032	2.2995
2.64132	2.84343	2.47085
2.63745	2.85607	2.50683
2.63065	2.86262	2.45654
2.55809	2.84774	2.28767
2.48702	2.71257	2.3997
2.44109	2.76753	2.53066
2.44899	2.54012	2.55204
2.45334	2.62551	2.52909
2.45202	2.81346	2.45031
2.43042	2.95314	2.7051
2.41032	2.8238	2.44039
2.42726	2.96551	2.37711
2.52742	2.791	2.41378
2.49265	2.7564	2.53976
2.46762	2.79325	2.60184
2.52551	2.77533	2.48275
2.51194	2.95359	2.36547
2.45034	2.81899	2.45982
2.46447	2.68225	2.53162
2.51359	2.71477	2.58092
2.493	2.92183	2.63383
2.48538	2.67779	2.37649
2.54223	2.67952	2.37045
2.55628	2.81404	2.57672
2.56212	2.5736	2.50192
2.5529	2.73252	2.63675
2.47934	2.67423	2.44631
2.50369	2.87403	2.56348
2.47368	2.74993	2.55173
2.4473	2.63442	2.3549
2.51235	2.73216	2.46472
2.54628	2.73606	2.49721
2.56324	2.83579	2.54933
2.54321	2.68692	2.56543
2.57656	2.6937	2.66718
2.5529	2.75735	2.69685
2.57103	2.93958	2.62706
2.54755	2.85436	2.66943
2.53615	2.78834	2.54805
2.53458	2.8509	2.45935
2.52582	2.62636	2.47775
2.45758	2.52334	2.55252
2.47561	2.83438	2.53841
2.42448	2.88806	2.57451
2.48872	3.04988	2.46623
2.43071	2.86364	2.32984
2.44316	2.74224	2.58458
2.51066	2.68916	2.45279
2.50635	2.77322	2.43525
2.57943	2.81339	2.51479
2.58124	2.82391	2.37763
2.58381	2.61242	2.64691
2.43709	2.67316	2.59578
2.48092	2.73552	2.5217
2.50535	2.65421	2.54412
2.53186	2.84585	2.5018
2.50684	2.66431	2.49486
2.56424	2.80737	2.39932
2.57444	2.64763	2.57329
2.61327	2.61413	2.57735
2.59919	2.55965	2.6018
2.53869	2.76133	2.62023
2.59099	2.64235	2.56339
2.48854	2.60835	2.48986
2.54304	2.92463	2.61289
2.52657	2.7379	2.65757
2.59608	2.79104	2.66409
2.60435	2.93326	2.55538
2.51403	2.92094	2.55498
2.5853	2.9489	2.67869
2.60559	2.80813	2.48449
2.50098	2.61356	2.49538
2.5325	2.6273	2.50184
2.60384	2.67299	2.40713
2.56341	2.69847	2.34312
2.48942	2.70882	2.67691
2.48363	2.81326	2.5876
2.5316	2.77445	2.63514
2.56139	2.91461	2.5846
2.48448	2.98825	2.61562
2.52753	2.95955	2.66179
2.56285	2.82508	2.47391
2.53463	2.80127	2.53311
2.62084	2.81522	2.59912
2.60084	2.86951	2.65244
2.71773	2.71669	2.64125
2.70281	2.66208	2.71388
2.55722	2.79035	2.69133
2.59495	2.80899	2.68034
2.59363	2.79405	2.55939
2.61276	2.79045	2.6684
2.64301	2.67264	2.76483
2.59091	2.84825	2.69896
2.59274	2.79348	2.59321
2.59484	2.97809	2.78991
2.59378	2.86497	2.59616
2.53538	2.8362	2.63379
2.66642	2.83714	2.65742
2.63002	2.71896	2.59439
2.59702	2.64092	2.42082
2.63763	2.81639	2.47539
2.66755	2.89754	2.37321
2.56896	2.84018	2.45403
2.61173	2.87221	2.55134
2.62117	2.81212	2.61664
2.58573	2.83035	2.56467
2.69201	2.86715	2.60392
2.62921	2.82567	2.53494
2.56239	2.72667	2.70491
2.54519	2.59513	2.56995
2.56689	2.62165	2.46901
2.5011	2.89043	2.59691
2.44244	2.84932	2.51231
2.54516	2.75797	2.57127
2.46468	2.74267	2.5661
2.44889	2.78078	2.76168
2.5523	2.78735	2.78807
2.58294	2.79415	2.76489
2.58695	2.95531	2.7046
2.54886	2.74978	2.58782
2.68994	2.76146	2.50758
2.61752	2.78039	2.43755
2.56228	2.74656	2.38667
2.58258	2.70223	2.43723
2.55566	2.77744	2.55335
2.56171	2.82265	2.43315
2.50336	2.7542	2.47
2.52475	2.77525	2.47539
2.62688	2.85655	2.3926
2.62973	3.05253	2.56504
2.67122	2.88786	2.52683
2.66862	2.72532	2.56024
2.75283	2.61965	2.49451
2.70129	2.59975	2.65629
2.70083	2.65042	2.73506
2.65679	2.54813	2.6879
2.61515	2.62033	2.76924
2.68165	2.71616	2.67152
2.73526	2.81128	2.69985
2.63287	2.742	2.53674
2.6381	2.73766	2.666
2.69017	2.53121	2.53056
2.72158	2.58732	2.46501
2.64504	2.73324	2.54596
2.65885	2.57299	2.52152
2.67774	2.59343	2.49046
2.58633	2.78999	2.65782
2.80389	2.72836	2.60767
2.69485	2.61146	2.59765
2.67705	2.63456	2.64962
2.68187	2.61205	2.6319
2.70209	2.77624	2.77775
2.63601	2.69591	2.6613
2.6183	2.79226	2.51989
2.75962	2.75738	2.46183
2.67657	2.63853	2.81894
2.7603	2.75963	2.72095
2.67083	2.79966	2.77405
2.6219	2.70237	2.63425
2.66579	2.78947	2.93179
2.66634	2.79146	2.98484
2.6679	2.62787	2.67131
2.56447	2.86043	2.75227
2.65843	2.84067	2.7716
2.74935	2.76854	2.70391
2.68962	2.76288	2.72751
2.62033	2.78779	2.61626
2.69486	2.65558	2.74815
2.6883	2.67733	2.8854
2.66343	2.66955	2.83948
2.65666	2.6313	2.90375
2.61845	2.64662	2.96609
2.65942	2.641	2.83026
2.60694	2.58764	2.9876
2.60739	2.59704	2.93736
2.62974	2.53221	3.02733
2.61952	2.4701	3.02986
2.61544	2.66754	3.09319
2.63938	2.73668	2.90827
2.64362	2.75291	2.82574
2.62934	2.85249	2.77312
2.69251	2.91928	2.72589
2.67437	2.83257	2.79543
2.70835	2.93833	2.80697
2.71883	2.86595	2.84531
2.60862	2.80209	2.7651
2.64013	2.75478	2.66017
2.66017	2.65028	2.87307
2.70097	2.78401	2.90747
2.64118	2.76407	2.75346
2.65661	2.78713	2.81987
2.71167	2.77474	2.78942
2.67484	2.69624	2.98265
2.76664	2.79807	2.96542
2.83165	2.89132	3.00336
2.82302	2.64972	2.95362
2.86073	2.73419	2.7619
2.85723	2.75479	2.90475
2.81484	2.88106	2.89053
2.77466	2.7971	2.99509
2.7118	2.64514	2.99743
2.66972	2.48561	2.93276
2.74591	2.46853	3.02486
2.6394	2.62704	2.99771
2.78666	2.51285	3.34255
2.65891	2.58676	2.93857
2.67361	2.6779	2.8188
2.74144	2.67626	2.9737
2.7168	2.83012	2.98515
2.68642	2.94356	2.9331
2.71508	2.68891	3.11921
2.65745	2.69382	2.97908
2.80714	2.60863	3.10309
2.74168	2.68216	2.92521
2.69242	2.69878	2.92471
2.7484	2.667	3.11623
2.63766	2.83919	2.8989
2.67674	2.82279	2.90511
2.77845	2.73939	2.9584
2.7251	2.75447	2.72163
2.70229	2.78462	2.66158
2.73029	2.80725	2.75802
2.70392	2.89724	2.71826
2.69658	2.95274	2.85987
2.77705	2.85879	2.7719
2.69357	2.91816	2.64263
2.63006	2.73204	2.77555
2.76834	2.71389	2.9387
2.80029	2.60391	2.87
2.71594	2.48048	2.76601
2.7233	2.60495	2.73631
2.77549	2.73999	2.90623
2.73359	2.72101	2.96922
2.77213	2.98447	2.84722
2.7876	2.88384	2.82398
2.72923	2.8242	2.89182
2.75012	2.81955	3.02431
2.77299	2.7714	2.88394
2.81867	2.58802	2.95536
2.91852	2.755	3.05127
2.79986	2.75003	2.86021
2.80841	2.82282	2.6279
2.77876	2.87376	2.58602
2.67785	2.79904	2.83814
2.64308	2.58634	2.90612
2.75945	2.52593	3.0432
2.68794	2.50962	3.07295
2.72423	2.71586	2.88918
2.71256	2.78229	2.66881
2.75332	2.63055	2.97369
2.70829	2.73509	2.82766
2.72969	2.70441	2.79215
2.62317	2.71414	2.71768
2.6148	2.77987	2.95963
2.7171	2.85522	2.92978
2.73444	2.87878	2.78075
2.86005	2.78769	2.83775
2.78122	2.87374	2.88399
2.70238	3.00085	2.80888
2.77516	2.85098	3.10165
2.7696	2.85406	2.98566
2.70528	2.76148	2.95139
2.7562	2.64248	2.9955
2.75611	2.69211	2.76087
2.71559	2.82727	2.82059
2.75601	2.81403	2.91871
2.825	2.82229	2.94402
2.75634	3.08872	2.61572
2.77203	2.95871	2.69281
2.73875	2.68582	2.76679
2.77815	2.68469	2.85742
2.72688	2.62701	2.80037
2.69647	2.52697	2.70612
2.65056	2.50742	2.72879
2.81107	2.54764	2.82196
2.79218	2.3252	2.98028
2.79212	2.7318	2.90272
2.86737	2.8204	2.74009
2.77638	2.64334	2.7728
2.84062	2.69606	2.81384
2.85541	2.50215	2.82058
2.81022	2.47107	2.9953
2.81998	2.718	2.8715
2.82962	2.6861	3.08146
2.77258	2.47019	2.9175
2.73179	2.56008	2.82752
2.75613	2.58236	2.91643
2.81988	2.45473	2.92862
2.7804	2.4707	2.89304
2.80929	2.66483	2.91643
2.70919	2.60842	2.84771
2.81961	2.6321	3.01646
2.79916	2.88442	3.15085
2.83668	2.86115	2.8291
2.8247	2.83789	2.91836
2.82974	2.70648	2.90631
2.82629	2.75296	2.9495
2.85153	2.78642	3.11859
2.7966	2.69773	3.01844
2.88711	2.78707	3.00271
2.8724	2.84045	3.20454
2.79257	2.63581	3.03359
2.77377	2.76499	2.87528
2.86085	2.72399	2.81644
2.90324	2.74352	3.0755
2.88135	2.64069	3.06798
2.89614	2.86438	2.90785
2.86271	2.72009	3.119
2.85749	2.71064	3.05249
2.87243	2.72776	3.0209
2.94504	2.68189	3.29937
2.94575	2.62769	3.21447
2.85408	2.64341	3.25481
2.82232	2.61772	3.10799
2.80732	2.53037	3.16352
2.93347	2.56728	3.02215
2.89254	2.37272	3.1732
2.80203	2.48873	3.14882
2.9111	2.59891	3.21107
2.85856	2.6061	3.00715
2.82092	2.49701	3.03375
2.86389	2.52731	3.20003
2.95349	2.47254	2.98292
2.90099	2.6381	2.90903
2.94486	2.48635	3.14749
2.85255	2.67404	3.08848
2.92986	2.6442	3.04323
2.95982	2.71188	2.94284
2.78279	2.77425	3.01916
2.88007	2.58503	2.89285
2.90344	2.41402	2.9586
2.92535	2.72418	2.77173
3.05269	2.49139	2.68604
2.88707	2.59928	2.83185
2.85998	2.74731	2.84287
2.90196	2.78841	2.95219
2.921	2.78698	3.12228
2.83623	2.73581	3.11437
2.84146	2.53541	3.0937
2.99043	2.77887	3.11133
3.06633	2.80492	2.99021
2.98302	2.79714	3.01586
3.02678	2.6331	3.03925
3.12444	2.52232	3.11358
3.14585	2.58198	3.10205
3.00471	2.80258	3.03914
2.95864	3.04759	3.05657
2.97459	2.74153	3.11617
2.86618	2.6079	3.0878
2.77872	2.86411	3.08419
2.93636	2.87574	3.23678
2.97766	2.84899	3.40876
2.92525	2.74478	3.34194
2.96526	2.74201	2.93881
2.9389	2.61523	2.91292
3.00502	2.41514	3.06904
3.021	2.25282	3.11804
3.02452	2.43111	2.9364
3.04818	2.45067	2.86666
3.01301	2.53842	2.87741
3.003	2.58268	2.85137
2.91946	2.74797	2.69271
2.87203	2.66842	2.78634
2.87494	2.60485	2.73526
2.91992	2.66442	2.8332
3.00164	2.63041	2.94279
2.96464	2.61596	2.89974
2.95962	2.72441	2.84078
2.98932	2.69766	2.91262
3.0255	2.5394	3.13266
3.02218	2.54454	3.30414
3.01914	2.62587	3.33585
2.97473	2.53014	3.0452
2.92914	2.56865	2.91716
2.94651	2.63932	3.00308
3.02418	2.60419	2.99515
2.93329	2.5851	3.14349
2.89566	2.56351	3.1344
2.91982	2.84489	3.29225
2.97649	2.72065	3.19603
2.95215	2.85161	2.88239
2.97052	2.70868	2.68554
2.99306	2.69927	2.93049
2.94941	2.61618	3.10274
2.9207	2.60565	3.12589
2.91667	2.59294	3.06429
3.05347	2.59879	3.02037
3.09664	2.68796	3.15154
2.96685	2.70723	3.21572
3.04878	2.73571	3.08656
3.07054	2.75513	2.99473
2.95472	3.05408	3.10236
2.87335	2.77943	3.16747
3.01895	2.58705	3.2941
3.00274	2.50544	3.30999
2.97421	2.72009	3.00197
3.05807	2.83225	3.05936
3.00711	2.60209	2.91545
3.14776	2.78033	2.88062
3.06613	2.60197	3.07131
3.03894	2.58934	2.99463
3.05096	2.57685	3.0785
3.05499	2.64772	3.02963
3.01043	2.55686	3.13069
3.04842	2.48793	3.18345
3.22848	2.73139	3.02649
2.96778	2.50453	3.12055
3.12652	2.42364	2.91238
3.15691	2.63267	2.94356
3.00704	2.51808	3.16979
3.02689	2.53477	3.11
3.15221	2.44246	3.40032
3.03117	2.52266	3.11561
2.95398	2.67723	3.00801
3.08225	2.51518	3.2109
3.08965	2.72389	3.12644
2.97462	2.65664	2.99507
3.00223	2.61271	3.03062
3.08522	2.77531	3.14411
3.06689	2.79227	2.91991
3.0475	3.03748	3.07581
3.07665	2.80173	3.08185
3.08124	2.56322	3.00698
3.21417	2.56786	3.07546
2.99867	2.57227	3.33844
2.98554	2.75212	3.08701
3.00215	2.83352	2.93115
2.87656	2.73742	3.07915
3.01852	2.59964	3.10819
3.001	2.87862	3.05701
2.96349	2.87109	3.2043
2.93057	2.64117	3.04134
2.91258	2.66721	3.09078
2.94253	2.53571	3.06479
2.9336	2.5331	3.11405
3.15171	2.57244	3.18209
3.03489	2.41504	3.16443
2.96777	2.46009	3.2168
2.9815	2.54247	3.05974
2.98854	2.25384	2.85445
2.89474	2.54819	2.76039
2.98933	2.43034	2.68735
3.12877	2.37126	2.73306
3.04588	2.37241	2.91005
2.95169	2.63386	2.90657
2.95883	2.72547	3.0244
3.17817	2.84381	2.91807
3.15163	2.96038	3.30535
3.17385	2.8032	3.15256
3.12996	2.84156	3.25425
3.10667	2.73124	3.21838
3.1799	2.76476	3.15323
3.08754	2.59743	3.04915
3.19192	2.47293	3.18335
3.10423	2.4524	3.20929
3.0402	2.60385	3.0885
3.05574	2.68908	2.99922
3.07241	2.41101	2.82254
3.22379	2.38527	2.99705
3.0016	2.64775	3.20363
3.14544	2.46752	3.29628
3.11519	2.56876	3.37964
3.01767	2.4937	3.20867
3.12207	2.43951	3.15386
3.02503	2.62109	3.24843
3.19447	2.48365	3.39795
3.2191	2.34104	3.52176
3.15748	2.64178	3.21482
[truncated: 816 more rows]
