# Supplementary material for: Myosin with hypertrophic cardiac mutation R712L has a decreased working stroke which is rescued by omecamtiv mecarbil
Source: eLife journal article supplement (doi:10.7554/elife.63691), 2021-02-19
Supplement: fig5-data1 [file Fig5D Source Data.xlsx]

## Sheet: Sheet1
Molecule #	Displacement Size in Buffer A (nm)	Displacement Size in Buffer B (nm)	Displacement Size in ~50% Buffer A (nm)	Buffer A Contents	Buffer B Contents
mol 1	5.91	1.83	3.62	50 μM OM	no OM
mol 2	2.23	0.12	n/a	50 μM OM	no OM
mol 3	3.39	0.38	n/a	50 μM OM	no OM
mol 4	2.58	3.68	n/a	no OM	50 μM OM
mol 5	0.1	1.65	n/a	no OM	50 μM OM
mol 6	2.86	4.94	n/a	no OM	50 μM OM
